# Supplementary material
Source: MDPI journal article supplement (https://www.mdpi.com/2073-4344/10/12/1396)
Supplement: s1 [file s1]

**Comparison of the reactivity and structures for the neutral and cationic bis(imino)pyridyl iron and cobalt species by DFT calculations**

Zilong Li<sup>1,2</sup>, Yanping Ma <sup>1\*</sup>, Wen-Hua Sun<sup>1,2,3\*</sup>

<sup>1</sup> Key Laboratory of Engineering Plastics and Beijing National Laboratory for Molecular Sciences, Institute of Chemistry, Chinese Academy of Sciences, Beijing 100190, China; lizilong@iccas.ac.cn

<sup>2</sup> CAS Research/Education Center for Excellence in Molecular Sciences, University of Chinese Academy of Sciences, Beijing 100049, China

<sup>3</sup> State Key Laboratory for Oxo Synthesis and Selective Oxidation, Lanzhou Institute of Chemical Physics, Chinese Academy of Sciences, Lanzhou 730000, China

\* Correspondence: myanping@iccas.ac.cn (Y.M.); whsun@iccas.ac.cn (W.-H.S.); Tel.: +86-10-6255-7955 (Y.M. & W.-H.S.)

**Contents**

- 1. Figure S1** The DFT optimized structures of the neutral cobalt system <sup>0</sup>Co(0) in Figure 1. The bond distance is listed for the active center in Å.
- 2. Figure S2** The DFT optimized structures of the neutral cobalt system <sup>1</sup>Co(0) in Figure 1. The bond distance is listed for the active center in Å.
- 3. Figure S3** The DFT optimized structures of the cationic cobalt system <sup>1/2</sup>Co(+) in Figure 3. The bond distance is listed for the active center in Å.
- 4. Figure S4** The DFT optimized structures of the cationic cobalt system <sup>3/2</sup>Co(+) in Figure 3. The bond distance is listed for the active center in Å.
- 5. Figure S5** The DFT optimized structures of the cationic iron system <sup>1</sup>Fe(+) in Figure 5. The bond distance is listed for the active center in Å.
- 6. Figure S6** The DFT optimized structures of the cationic iron system <sup>2</sup>Fe(+) in Figure 5. The bond distance is listed for the active center in Å.
- 7. Figure S7** The DFT optimized structures of the neutral iron system <sup>1/2</sup>Fe(0) in Figure 6. The bond distance is listed for the active center in Å.
- 8. Figure S8** The DFT optimized structures of the neutral iron system <sup>3/2</sup>Fe(0) in Figure 6. The bond distance is listed for the active center in Å.
- 9. Figure S9** The DFT optimized structures of the cobalt system <sup>0</sup>LCo(+) <sup>B</sup> in Figure 9. The bond distance is listed for the active center in Å.
- 10. Figure S10** The DFT optimized structures of the cobalt system <sup>1</sup>LCo(+) <sup>B</sup> in Figure 9. The bond distance is listed for the active center in Å.
- 11. Table S1** The factors for calculating the structure parameter Δ in <sup>0</sup>Co(0).
- 12. Table S2** The factors for calculating the structure parameter Δ in <sup>1</sup>Co(0).
- 13. Table S3** The factors for calculating the structure parameter Δ in <sup>1/2</sup>Co(+).
- 14. Table S4** The factors for calculating the structure parameter Δ in <sup>3/2</sup>Co(+).
- 15. Table S5** The factors for calculating the structure parameter Δ in <sup>1</sup>Fe(+).
- 16. Table S6** The factors for calculating the structure parameter Δ in <sup>2</sup>Fe(+).
- 17. Table S7** The factors for calculating the structure parameter Δ in <sup>1/2</sup>Fe(0).
- 18. Table S8** The factors for calculating the structure parameter Δ in <sup>3/2</sup>Fe(0).

**19. Table S9** The NBO charge distribution for  $^s\text{M}(q)\text{-1}$  and  $^s\text{M}(q)\text{-2}$ , M includes iron and cobalt, s means the spin states and the q refers to the charge number.

**20. Table S10** The factors for calculating the structure parameter  $\Delta$  in  $^0\text{Co}(+)\text{B}$ .

**21. Table S11** The factors for calculating the structure parameter  $\Delta$  in  $^1\text{Co}(+)\text{B}$ .

**22.** Coordinates of all optimized structures:

Optimized Structures:

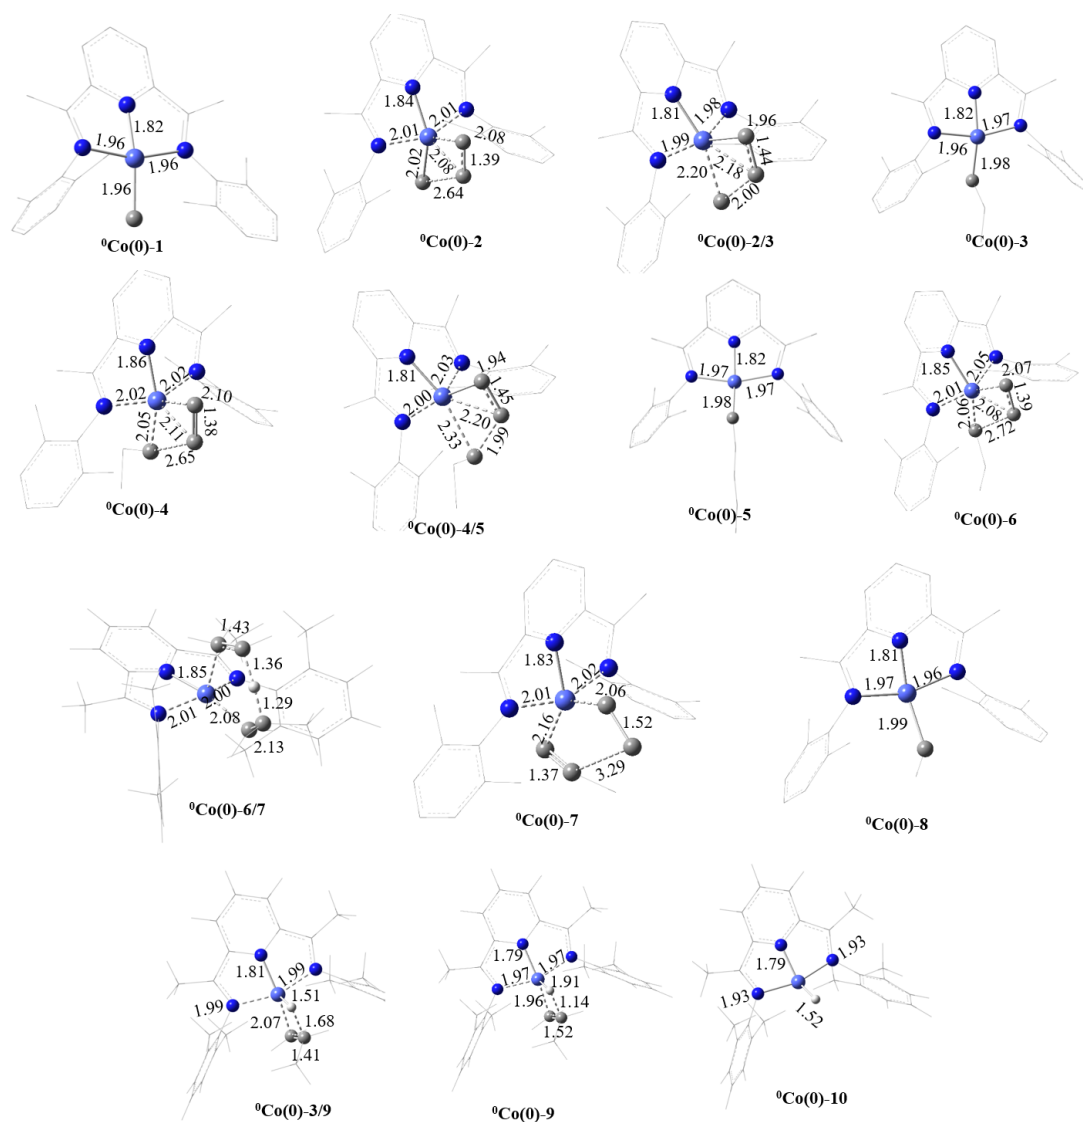

**Figure S1** The DFT optimized structures of the neutral cobalt system  $^0\text{Co}(0)$  in Figure 1. The bond distance is listed for the active center in Å.

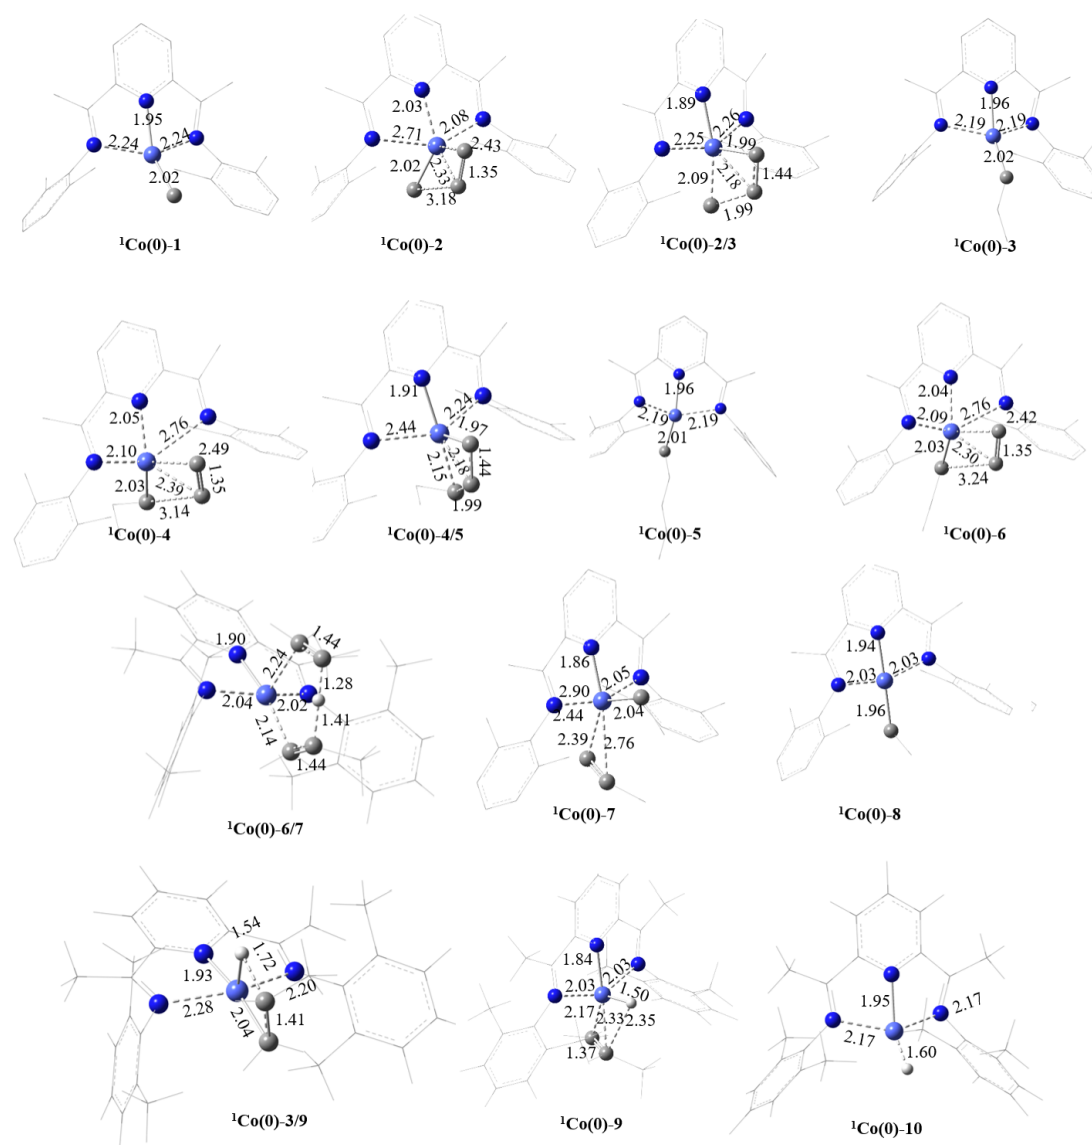

**Figure S2** The DFT optimized structures of the neutral cobalt system  $^1\text{Co}(0)$  in Figure 1. The bond distance is listed for the active center in Å.

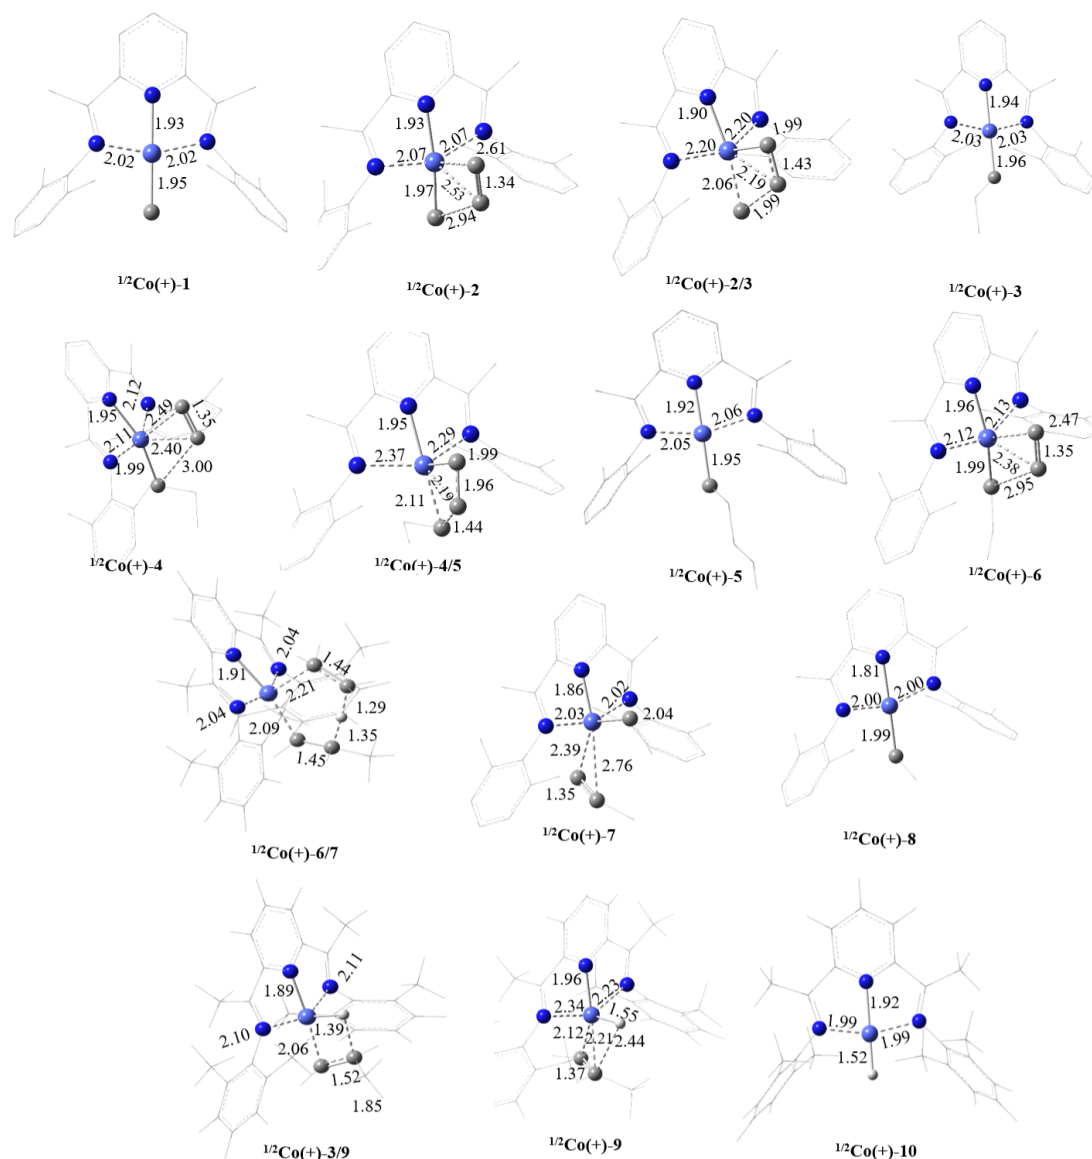

**Figure S3** The DFT optimized structures of the cation cobalt system  $^{1/2}\text{Co}(+)$  in Figure 3. The bond distance is listed for the active center in Å.

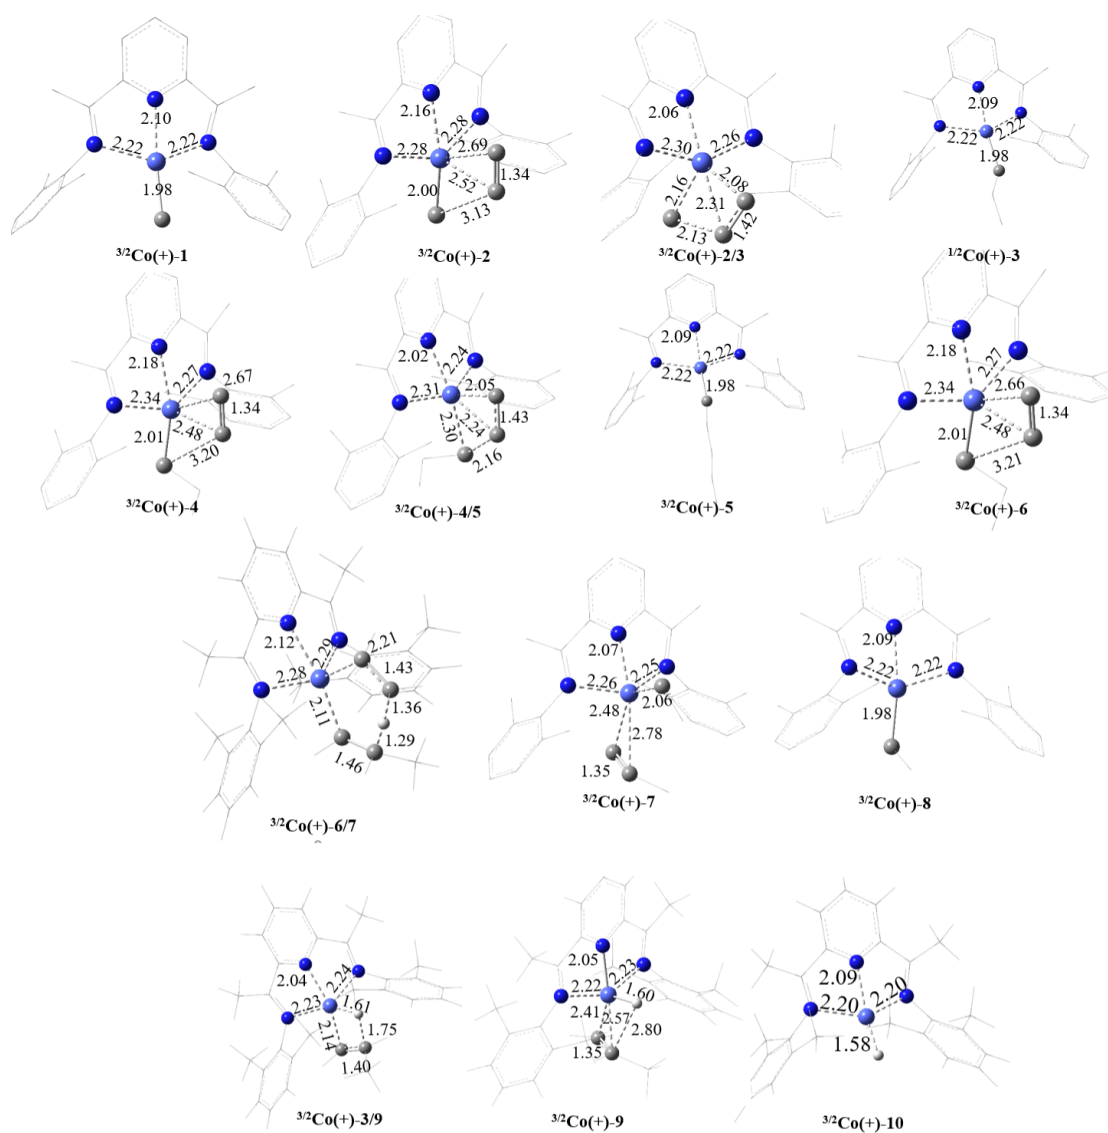

**Figure S4** The DFT optimized structures of the cation cobalt system  $^{3/2}\text{Co}(+)$  in Figure 3. The bond distance is listed for the active center in Å.

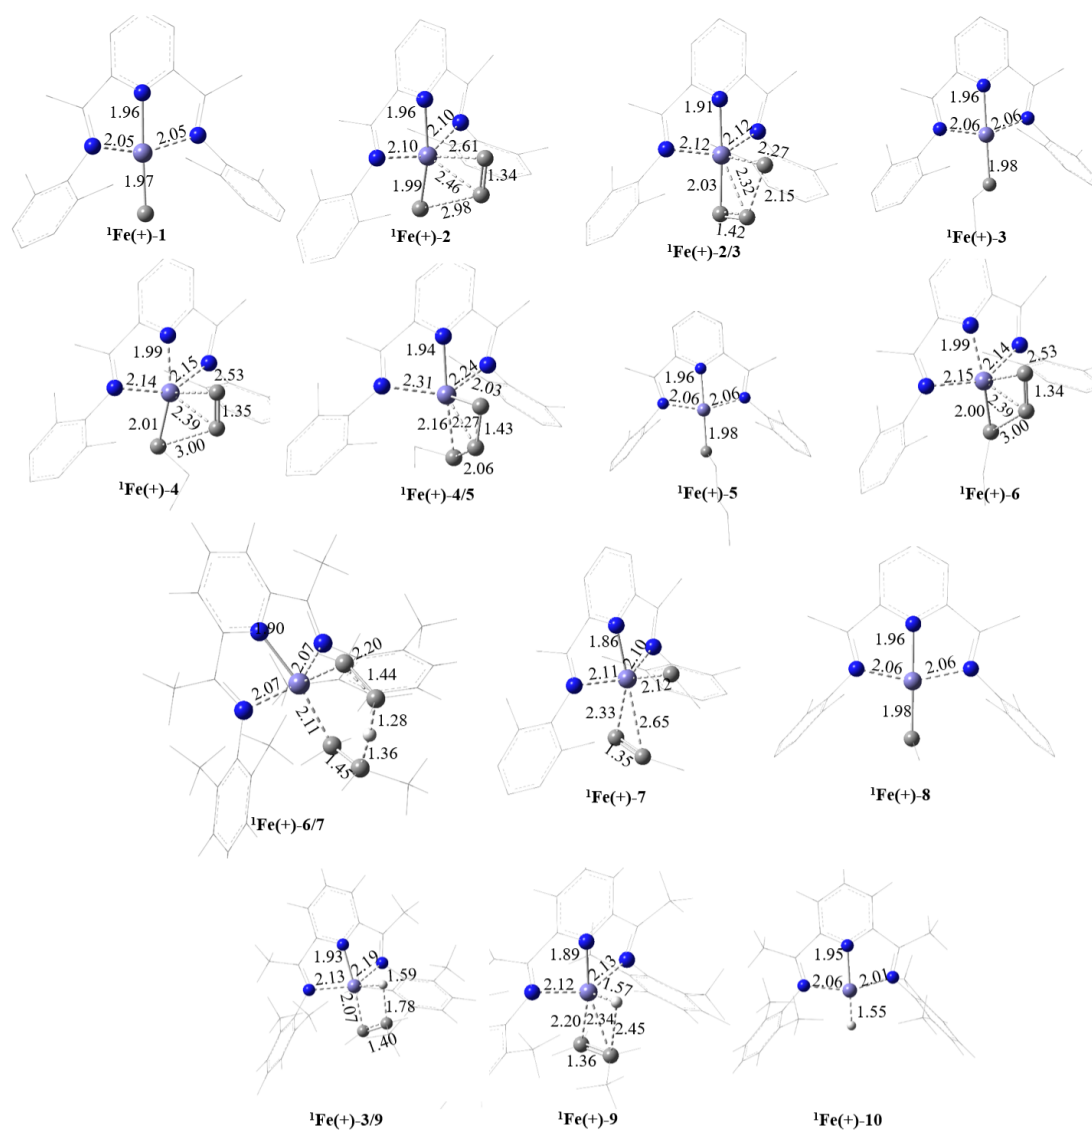

**Figure S5** The DFT optimized structures of the cation iron system  $^1\text{Fe}(+)$  in Figure 5. The bond distance is listed for the active center in Å.

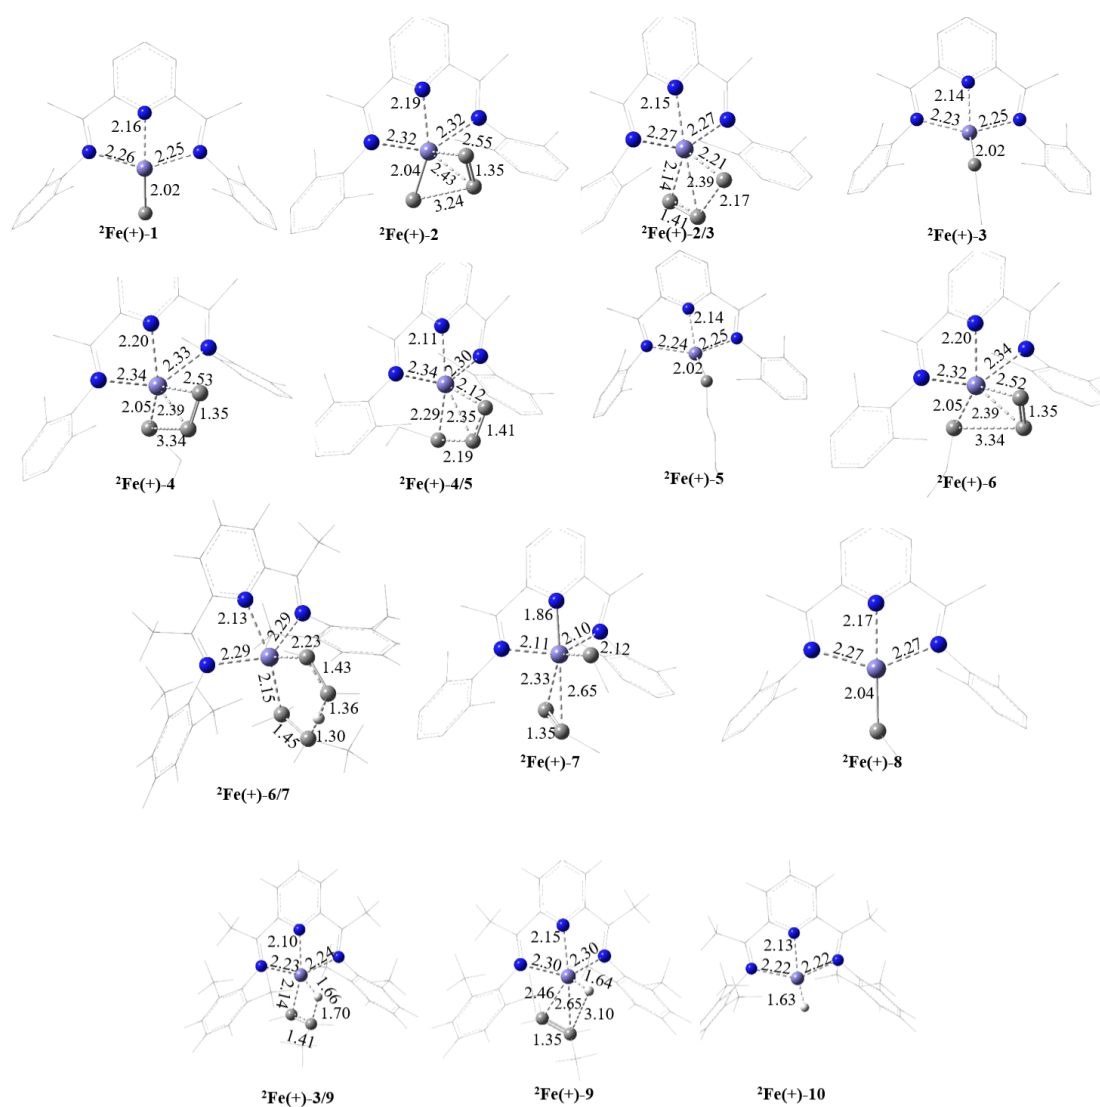

**Figure S6** The DFT optimized structures of the cation iron system  $^2\text{Fe}(+)$  in Figure 5. The bond distance is listed for the active center in Å.

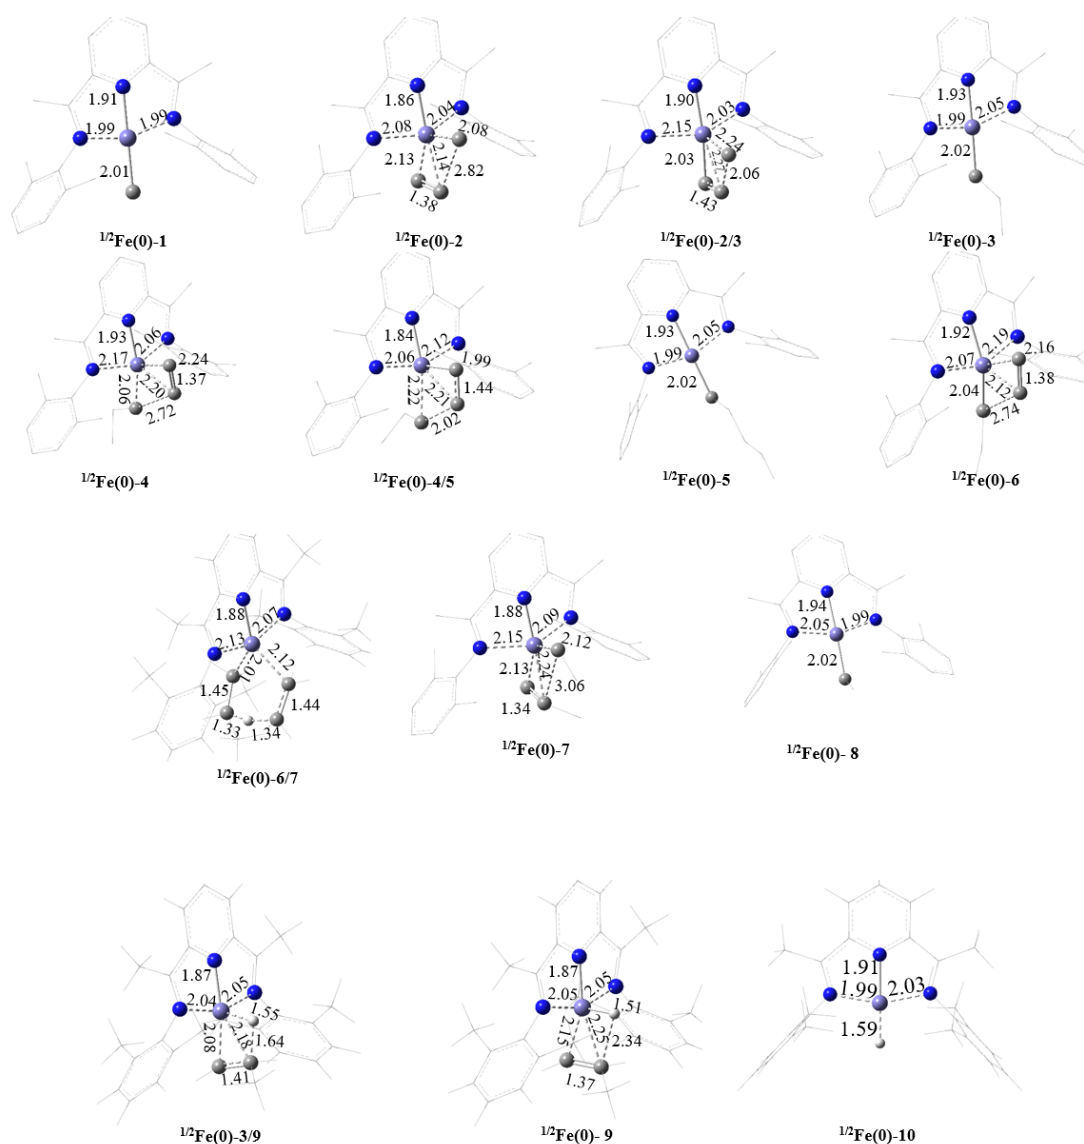

**Figure S7** The DFT optimized structures of the neutral iron system  $^{1/2}\text{Fe(0)}$  in Figure 6. The bond distance is listed for the active center in Å.



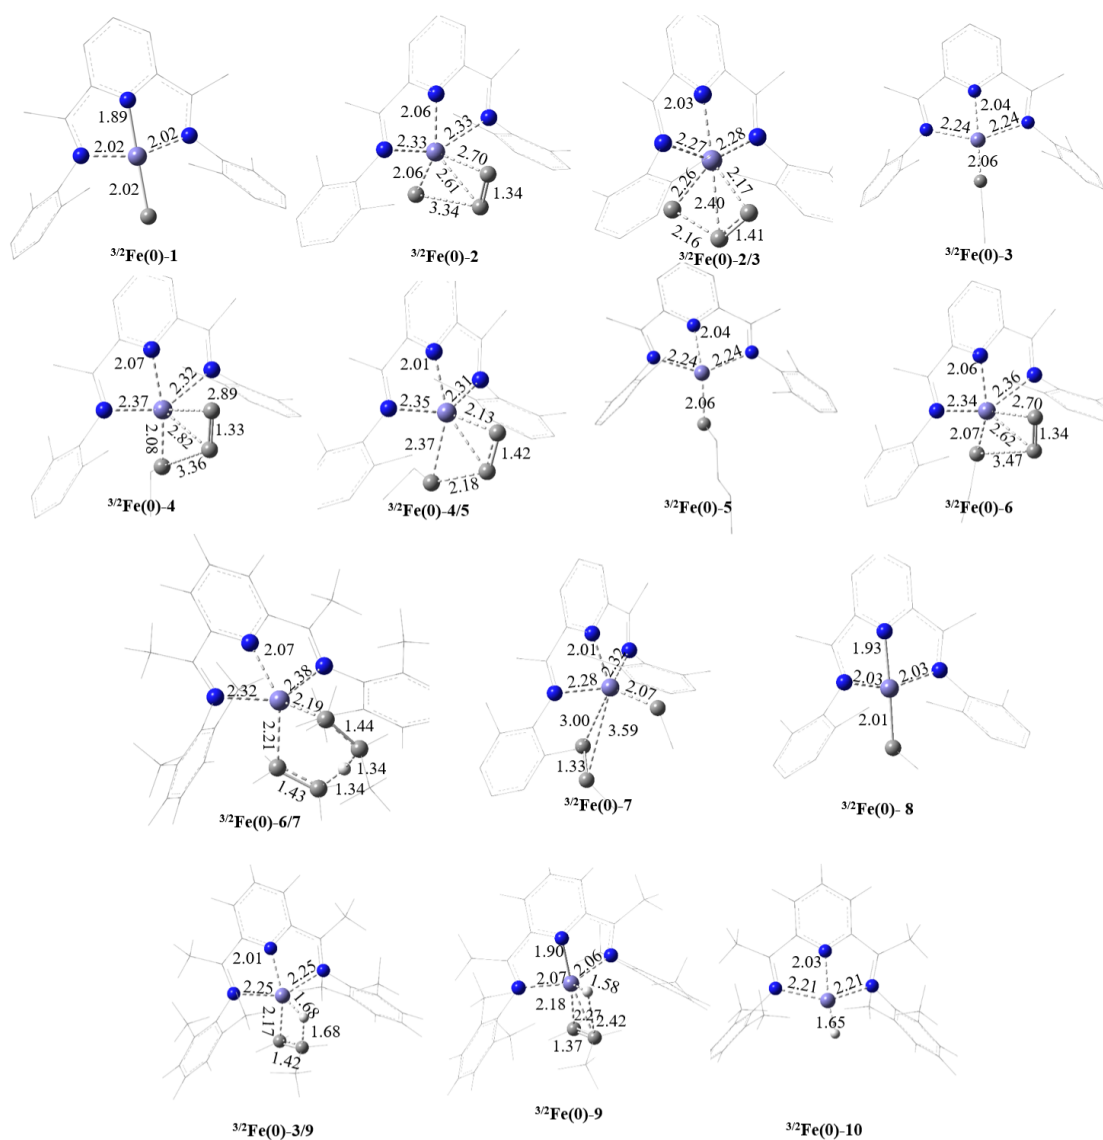

**Figure S8** The DFT optimized structures of the neutral cobalt system  $^{3/2}\text{Fe}(0)$  in Figure 6. The bond distance is listed for the active center in Å.

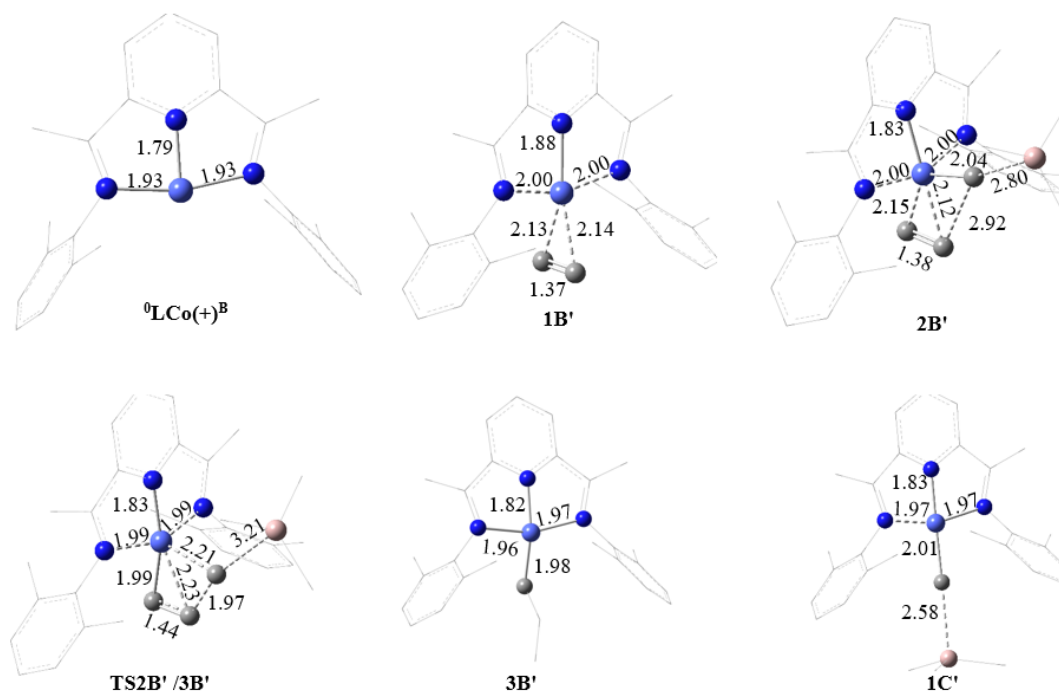

**Figure S9** The DFT optimized structures of the cobalt system  ${}^0\text{LCo}(+)^{\text{B}}$  in Figure 9. The bond distance is listed for the active center in Å.

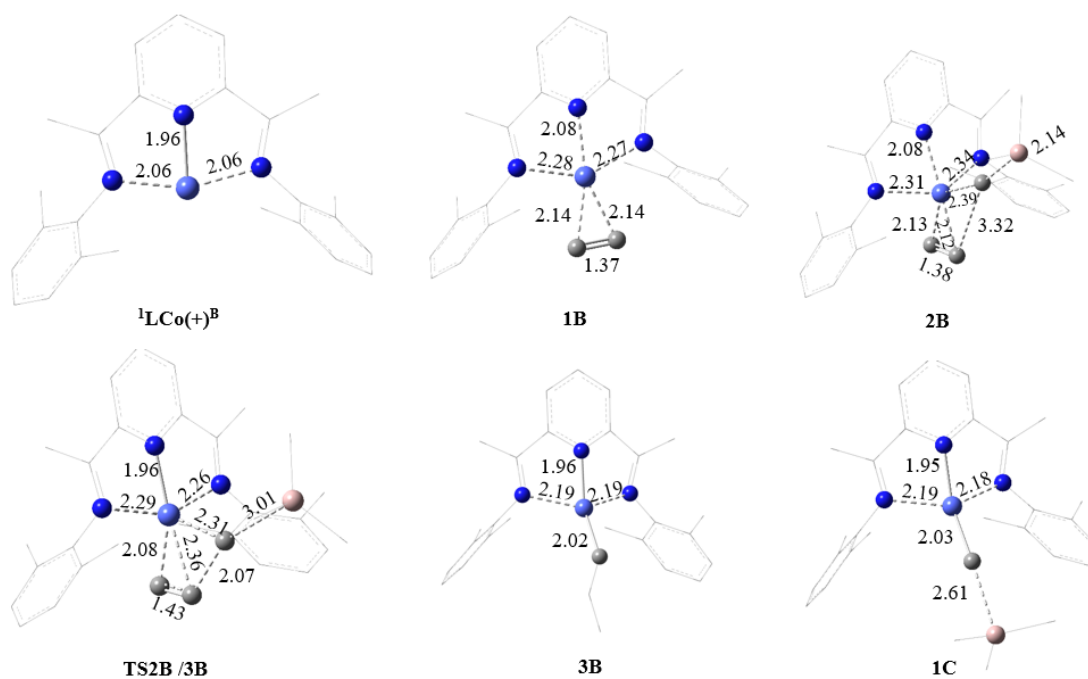

**Figure S10** The DFT optimized structures of the cobalt system  ${}^1\text{LCo}(+)^{\text{B}}$  in Figure 9. The bond distance is listed for the active center in Å.

**Table S1** The factors for calculating the structure parameter  $\Delta$  in  $^0\text{Co}(\text{O})$ .

| $^0\text{Co}(\text{O})$ | $d_1$ | $d_1'$ | $d_2$ | $d_2'$ | $d_3$ | $d_3'$ | $\Delta$ |
|-------------------------|-------|--------|-------|--------|-------|--------|----------|
| 1                       | 1.372 | 1.372  | 1.445 | 1.445  | 1.318 | 1.318  | 0.100    |
| 2                       | 1.376 | 1.376  | 1.436 | 1.436  | 1.325 | 1.325  | 0.085    |
| TS-2/3                  | 1.384 | 1.385  | 1.424 | 1.423  | 1.340 | 1.341  | 0.061    |
| 3                       | 1.374 | 1.374  | 1.442 | 1.442  | 1.320 | 1.320  | 0.096    |
| 4                       | 1.373 | 1.373  | 1.436 | 1.436  | 1.328 | 1.328  | 0.086    |
| TS-4/5                  | 1.385 | 1.384  | 1.420 | 1.422  | 1.342 | 1.341  | 0.058    |
| 5                       | 1.375 | 1.375  | 1.442 | 1.442  | 1.320 | 1.320  | 0.095    |

**Table S2** The factors for calculating the structure parameter  $\Delta$  in  $^1\text{Co}(\text{O})$ .

| $^1\text{Co}(\text{O})$ | $d_1$ | $d_1'$ | $d_2$ | $d_2'$ | $d_3$ | $d_3'$ | $\Delta$ |
|-------------------------|-------|--------|-------|--------|-------|--------|----------|
| 1                       | 1.372 | 1.372  | 1.461 | 1.461  | 1.304 | 1.304  | 0.123    |
| 2                       | 1.368 | 1.383  | 1.484 | 1.441  | 1.285 | 1.323  | 0.123    |
| TS-2/3                  | 1.377 | 1.377  | 1.454 | 1.455  | 1.308 | 1.307  | 0.112    |
| 3                       | 1.369 | 1.370  | 1.455 | 1.455  | 1.313 | 1.313  | 0.114    |
| 4                       | 1.386 | 1.369  | 1.438 | 1.485  | 1.325 | 1.284  | 0.120    |
| TS-4/5                  | 1.376 | 1.385  | 1.463 | 1.443  | 1.299 | 1.315  | 0.109    |
| 5                       | 1.370 | 1.370  | 1.455 | 1.455  | 1.312 | 1.312  | 0.114    |

**Table S3** The factors for calculating the structure parameter  $\Delta$  in  $^{1/2}\text{Co}(+)$ .

| $^{1/2}\text{Co}(+)$ | $d_1$ | $d_1'$ | $d_2$ | $d_2'$ | $d_3$ | $d_3'$ | $\Delta$ |
|----------------------|-------|--------|-------|--------|-------|--------|----------|
| 1                    | 1.337 | 1.337  | 1.491 | 1.491  | 1.297 | 1.297  | 0.174    |
| 2                    | 1.341 | 1.341  | 1.486 | 1.486  | 1.296 | 1.296  | 0.167    |
| TS-2/3               | 1.349 | 1.350  | 1.485 | 1.486  | 1.290 | 1.290  | 0.166    |
| 3                    | 1.337 | 1.337  | 1.490 | 1.490  | 1.297 | 1.297  | 0.173    |
| 4                    | 1.343 | 1.342  | 1.484 | 1.483  | 1.295 | 1.296  | 0.165    |
| TS-4/5               | 1.350 | 1.350  | 1.492 | 1.489  | 1.283 | 1.285  | 0.174    |
| 5                    | 1.340 | 1.340  | 1.485 | 1.485  | 1.297 | 1.297  | 0.167    |

**Table S4** The factors for calculating the structure parameter  $\Delta$  in  $^{3/2}\text{Co}(+)$ .

| $^{3/2}\text{Co}(+)$ | $d_1$ | $d_1'$ | $d_2$ | $d_2'$ | $d_3$ | $d_3'$ | $\Delta$ |
|----------------------|-------|--------|-------|--------|-------|--------|----------|
| 1                    | 1.338 | 1.338  | 1.497 | 1.497  | 1.286 | 1.286  | 0.185    |
| 2                    | 1.338 | 1.338  | 1.496 | 1.496  | 1.283 | 1.283  | 0.185    |
| TS-2/3               | 1.345 | 1.344  | 1.494 | 1.494  | 1.285 | 1.284  | 0.180    |
| 3                    | 1.338 | 1.338  | 1.496 | 1.496  | 1.288 | 1.288  | 0.183    |
| 4                    | 1.339 | 1.339  | 1.496 | 1.495  | 1.282 | 1.284  | 0.185    |
| TS-4/5               | 1.345 | 1.345  | 1.487 | 1.485  | 1.290 | 1.292  | 0.168    |
| 5                    | 1.338 | 1.338  | 1.495 | 1.495  | 1.288 | 1.288  | 0.183    |

**Table S5** The factors for calculating the structure parameter  $\Delta$  in  $^1\text{Fe}(+)$ .

| $^1\text{Fe}(+)$ | $d_1$ | $d_1'$ | $d_2$ | $d_2'$ | $d_3$ | $d_3'$ | $\Delta$ |
|------------------|-------|--------|-------|--------|-------|--------|----------|
| 1                | 1.344 | 1.344  | 1.481 | 1.481  | 1.300 | 1.300  | 0.159    |
| 2                | 1.352 | 1.352  | 1.473 | 1.473  | 1.302 | 1.302  | 0.146    |
| TS-2/3           | 1.357 | 1.357  | 1.467 | 1.467  | 1.305 | 1.305  | 0.136    |
| 3                | 1.347 | 1.347  | 1.476 | 1.476  | 1.302 | 1.302  | 0.150    |
| 4                | 1.352 | 1.352  | 1.471 | 1.472  | 1.300 | 1.301  | 0.145    |
| TS-4/5           | 1.360 | 1.360  | 1.474 | 1.470  | 1.294 | 1.298  | 0.144    |
| 5                | 1.348 | 1.348  | 1.475 | 1.474  | 1.303 | 1.303  | 0.149    |

**Table S6** The factors for calculating the structure parameter  $\Delta$  in  $^2\text{Fe}(+)$ .

| $^2\text{Fe}(+)$ | $d_1$ | $d_1'$ | $d_2$ | $d_2'$ | $d_3$ | $d_3'$ | $\Delta$ |
|------------------|-------|--------|-------|--------|-------|--------|----------|
| 1                | 1.337 | 1.337  | 1.498 | 1.498  | 1.285 | 1.285  | 0.187    |
| 2                | 1.342 | 1.342  | 1.492 | 1.497  | 1.284 | 1.283  | 0.182    |
| TS-2/3           | 1.343 | 1.344  | 1.491 | 1.491  | 1.285 | 1.285  | 0.177    |
| 3                | 1.339 | 1.339  | 1.495 | 1.496  | 1.289 | 1.288  | 0.182    |
| 4                | 1.343 | 1.342  | 1.496 | 1.491  | 1.283 | 1.286  | 0.180    |
| TS-4/5           | 1.347 | 1.347  | 1.488 | 1.487  | 1.288 | 1.289  | 0.170    |
| 5                | 1.339 | 1.339  | 1.496 | 1.495  | 1.288 | 1.288  | 0.182    |

**Table S7** The factors for calculating the structure parameter  $\Delta$  in  $^{1/2}\text{Fe}(0)$ .

| $^{1/2}\text{Fe}(0)$ | $d_1$ | $d_1'$ | $d_2$ | $d_2'$ | $d_3$ | $d_3'$ | $\Delta$ |
|----------------------|-------|--------|-------|--------|-------|--------|----------|
| 1                    | 1.369 | 1.369  | 1.447 | 1.447  | 1.332 | 1.332  | 0.097    |
| 2                    | 1.371 | 1.375  | 1.441 | 1.432  | 1.323 | 1.334  | 0.086    |
| TS-2/3               | 1.365 | 1.381  | 1.458 | 1.431  | 1.31  | 1.341  | 0.095    |
| 3                    | 1.375 | 1.356  | 1.432 | 1.461  | 1.346 | 1.313  | 0.099    |
| 4                    | 1.362 | 1.376  | 1.462 | 1.431  | 1.306 | 1.337  | 0.101    |
| TS-4/5               | 1.388 | 1.381  | 1.425 | 1.435  | 1.336 | 1.324  | 0.073    |
| 5                    | 1.373 | 1.355  | 1.43  | 1.461  | 1.346 | 1.314  | 0.098    |

**Table S8** The factors for calculating the structure parameter  $\Delta$  in  $^{3/2}\text{Fe}(0)$ .

| $^{3/2}\text{Fe}(0)$ | $d_1$ | $d_1'$ | $d_2$ | $d_2'$ | $d_3$ | $d_3'$ | $\Delta$ |
|----------------------|-------|--------|-------|--------|-------|--------|----------|
| 1                    | 1.371 | 1.365  | 1.448 | 1.443  | 1.332 | 1.331  | 0.095    |
| 2                    | 1.379 | 1.379  | 1.457 | 1.456  | 1.305 | 1.305  | 0.115    |
| TS-2/3               | 1.377 | 1.378  | 1.452 | 1.451  | 1.308 | 1.309  | 0.109    |
| 3                    | 1.373 | 1.373  | 1.454 | 1.454  | 1.311 | 1.311  | 0.112    |
| 4                    | 1.378 | 1.380  | 1.459 | 1.453  | 1.302 | 1.307  | 0.114    |
| TS-4/5               | 1.375 | 1.379  | 1.456 | 1.447  | 1.306 | 1.315  | 0.107    |
| 5                    | 1.371 | 1.371  | 1.454 | 1.454  | 1.311 | 1.311  | 0.112    |

**Table S9** The NBO charge distribution for sM(q)-1 and sM(q)-2, M includes iron and cobalt, s means the spin states and the q refers to the charge number.

| <sup>s</sup> M(q)-1           | <sup>1/2</sup> Co(+) | <sup>3/2</sup> Co(+) | <sup>1</sup> Fe(+) | <sup>2</sup> Fe(+) | <sup>0</sup> Co(0) | <sup>1</sup> Co(0) | <sup>1/2</sup> Fe(0) | <sup>3/2</sup> Fe(0) |
|-------------------------------|----------------------|----------------------|--------------------|--------------------|--------------------|--------------------|----------------------|----------------------|
| PBI                           | 0.060                | -0.089               | -0.030             | -0.095             | -0.449             | -0.705             | -0.540               | -0.760               |
| M                             | 0.746                | 1.060                | 0.837              | 1.090              | 0.428              | 0.911              | 0.617                | 0.818                |
| CH <sub>3</sub>               | -0.321               | -0.466               | -0.320             | -0.484             | -0.365             | -0.529             | -0.451               | -0.426               |
| 2Ar                           | 0.515                | 0.496                | 0.514              | 0.492              | 0.385              | 0.327              | 0.374                | 0.369                |
| <sup>s</sup> M(q)-2           | <sup>1/2</sup> Co(+) | <sup>3/2</sup> Co(+) | <sup>1</sup> Fe(+) | <sup>2</sup> Fe(+) | <sup>0</sup> Co(0) | <sup>1</sup> Co(0) | <sup>1/2</sup> Fe(0) | <sup>3/2</sup> Fe(0) |
| PBI                           | 0.049                | -0.073               | -0.065             | -0.072             | -0.402             | -0.677             | -0.393               | -0.774               |
| M                             | 0.648                | 1.010                | 0.968              | 1.020              | 0.192              | 0.831              | 0.283                | 0.968                |
| CH <sub>3</sub>               | -0.294               | -0.488               | -0.272             | -0.469             | -0.201             | -0.485             | -0.248               | -0.549               |
| C <sub>2</sub> H <sub>4</sub> | 0.098                | 0.078                | 0.103              | 0.072              | 0.038              | 0.036              | 0.010                | 0.054                |
| 2Ar                           | 0.498                | 0.472                | 0.490              | 0.449              | 0.373              | 0.295              | 0.347                | 0.301                |

**Table S10** The factors for calculating the structure parameter  $\Delta$  in <sup>0</sup>Co(+)<sup>B</sup>.

| <sup>0</sup> Co(+) <sup>B</sup> | d <sub>1</sub> | d <sub>1</sub> ' | d <sub>2</sub> | d <sub>2</sub> ' | d <sub>3</sub> | d <sub>3</sub> ' | $\Delta$ |
|---------------------------------|----------------|------------------|----------------|------------------|----------------|------------------|----------|
| LCo(+) <sup>B</sup>             | 1.350          | 1.350            | 1.477          | 1.477            | 1.302          | 1.302            | 0.150    |
| 1B                              | 1.343          | 1.343            | 1.479          | 1.479            | 1.299          | 1.299            | 0.158    |
| 2B                              | 1.375          | 1.375            | 1.435          | 1.435            | 1.327          | 1.327            | 0.084    |
| TS2B/3B                         | 1.381          | 1.381            | 1.433          | 1.433            | 1.330          | 1.330            | 0.077    |
| 3B                              | 1.374          | 1.374            | 1.442          | 1.442            | 1.320          | 1.320            | 0.095    |
| 1C                              | 1.364          | 1.364            | 1.452          | 1.452            | 1.312          | 1.312            | 0.114    |

**Table S11** The factors for calculating the structure parameter  $\Delta$  in <sup>1</sup>Co(+)<sup>B</sup>.

| <sup>1</sup> Co(+) <sup>B</sup> | d <sub>1</sub> | d <sub>1</sub> ' | d <sub>2</sub> | d <sub>2</sub> ' | d <sub>3</sub> | d <sub>3</sub> ' | $\Delta$ |
|---------------------------------|----------------|------------------|----------------|------------------|----------------|------------------|----------|
| LCo(+) <sup>B</sup>             | 1.334          | 1.334            | 1.497          | 1.497            | 1.298          | 1.298            | 0.181    |
| 1B                              | 1.342          | 1.342            | 1.492          | 1.492            | 1.283          | 1.283            | 0.180    |
| 2B                              | 1.346          | 1.345            | 1.484          | 1.485            | 1.288          | 1.288            | 0.168    |
| TS2B/3B                         | 1.376          | 1.375            | 1.457          | 1.456            | 1.306          | 1.306            | 0.116    |
| 3B                              | 1.369          | 1.370            | 1.455          | 1.455            | 1.313          | 1.313            | 0.114    |
| 1C                              | 1.368          | 1.368            | 1.458          | 1.458            | 1.310          | 1.310            | 0.119    |

Coordinate of all optimized structures:

B3LYP/6-311G\*[SDD]

<sup>0</sup>Co(0)

<sup>0</sup>Co(0)-1

| Atom | x           | y           | z           |
|------|-------------|-------------|-------------|
| C    | -1.18944000 | 2.46497300  | 0.13456600  |
| C    | -1.20792100 | 3.85634600  | 0.11032400  |
| C    | 0.00003800  | 4.55956200  | 0.10668100  |
| C    | 1.20798300  | 3.85632100  | 0.11037800  |
| C    | 1.18947800  | 2.46494900  | 0.13462600  |
| N    | 0.00000900  | 1.78253800  | 0.17006300  |
| H    | 0.00004900  | 5.64323200  | 0.08689200  |
| H    | -2.15189700 | 4.38958900  | 0.08895000  |
| H    | 2.15197100  | 4.38954600  | 0.08902600  |
| C    | -2.30239900 | 1.54378200  | 0.10287700  |
| C    | 2.30242100  | 1.54375000  | 0.10289100  |
| N    | 1.93606400  | 0.27914700  | 0.03822500  |
| N    | -1.93607200 | 0.27917200  | 0.03815400  |
| C    | 3.72112400  | 2.03708100  | 0.14205400  |
| H    | 3.95869500  | 2.61631600  | -0.75651500 |
| H    | 3.87604200  | 2.69942900  | 0.99884700  |
| H    | 4.43216300  | 1.21623500  | 0.21152000  |
| C    | -3.72109400 | 2.03713400  | 0.14209300  |
| H    | -3.87599600 | 2.69938000  | 0.99897000  |
| H    | -3.95865800 | 2.61648500  | -0.75640000 |
| H    | -4.43214700 | 1.21629100  | 0.21146500  |
| C    | 2.92510800  | -0.75630600 | 0.00804500  |
| C    | 3.24299700  | -1.42675600 | 1.20172600  |
| C    | 3.51234400  | -1.12009400 | -1.21626400 |
| C    | 4.18181300  | -2.45947500 | 1.15213300  |
| C    | 4.44457000  | -2.16065300 | -1.21968600 |
| C    | 4.78300300  | -2.82629600 | -0.04703600 |
| H    | 4.43771500  | -2.98377200 | 2.06829400  |
| H    | 4.90220800  | -2.45448100 | -2.15985100 |
| H    | 5.50647400  | -3.63509200 | -0.06884200 |
| C    | -2.92513100 | -0.75626500 | 0.00792900  |
| C    | -3.51213500 | -1.12021500 | -1.21644100 |
| C    | -3.24324900 | -1.42656100 | 1.20164000  |
| C    | -4.44435400 | -2.16078400 | -1.21990400 |
| C    | -4.18204600 | -2.45929400 | 1.15200300  |
| C    | -4.78300400 | -2.82627800 | -0.04723400 |
| H    | -4.90181100 | -2.45473700 | -2.16011800 |

|    |             |             |             |
|----|-------------|-------------|-------------|
| H  | -4.43811500 | -2.98347300 | 2.06818400  |
| H  | -5.50645800 | -3.63508800 | -0.06907500 |
| C  | -3.13696600 | -0.41694300 | -2.49668000 |
| H  | -3.52347300 | 0.60740700  | -2.53207600 |
| H  | -2.05168000 | -0.35234100 | -2.60547700 |
| H  | -3.53908600 | -0.94664800 | -3.36246700 |
| C  | -2.58813800 | -1.04118300 | 2.50418000  |
| H  | -1.49840300 | -1.10532000 | 2.43424500  |
| H  | -2.82083400 | -0.01106200 | 2.79215700  |
| H  | -2.91690000 | -1.69537000 | 3.31403000  |
| C  | 3.13739800  | -0.41665600 | -2.49647600 |
| H  | 2.05212700  | -0.35210400 | -2.60547600 |
| H  | 3.52384200  | 0.60772400  | -2.53164100 |
| H  | 3.53972500  | -0.94620800 | -3.36226000 |
| C  | 2.58763000  | -1.04156200 | 2.50419100  |
| H  | 2.82022000  | -0.01146500 | 2.79233800  |
| H  | 1.49791200  | -1.10574700 | 2.43404100  |
| H  | 2.91627000  | -1.69583400 | 3.31402200  |
| Co | -0.00004800 | -0.02519700 | -0.02513500 |
| C  | 0.00012500  | -1.83613300 | -0.76790400 |
| H  | 0.00001300  | -2.45919200 | 0.14722100  |
| H  | -0.88856200 | -2.12704100 | -1.33545600 |
| H  | 0.88895400  | -2.12699900 | -1.33524900 |

**<sup>0</sup>Co(0)-2**

| Atom | x           | y          | z           |
|------|-------------|------------|-------------|
| C    | 1.19341500  | 2.46349400 | -0.09732300 |
| C    | 1.20648500  | 3.84999700 | -0.21801300 |
| C    | -0.00022100 | 4.55164400 | -0.27494800 |
| C    | -1.20687000 | 3.84982400 | -0.21779800 |
| C    | -1.19343800 | 2.46340300 | -0.09711400 |
| N    | -0.00000300 | 1.78225400 | -0.02749900 |
| H    | -0.00027600 | 5.63105800 | -0.37311700 |
| H    | 2.14836600  | 4.38343600 | -0.27895300 |
| H    | -2.14895100 | 4.38297400 | -0.27850800 |
| C    | 2.31277500  | 1.56474300 | -0.07977700 |
| C    | -2.31290100 | 1.56474000 | -0.07950000 |
| N    | -1.97207500 | 0.28847000 | 0.02848200  |
| N    | 1.97176300  | 0.28846100 | 0.02837100  |
| C    | -3.72397000 | 2.06280400 | -0.24501800 |
| H    | -3.88447100 | 2.98391600 | 0.31941100  |
| H    | -3.94204600 | 2.28479000 | -1.29563700 |
| H    | -4.45396000 | 1.32808900 | 0.09008100  |
| C    | 3.72406300  | 2.06180100 | -0.24618100 |

|   |             |             |             |
|---|-------------|-------------|-------------|
| H | 3.94616900  | 2.27044400  | -1.29871700 |
| H | 3.88194800  | 2.98996800  | 0.30713900  |
| H | 4.45336100  | 1.33183100  | 0.10075300  |
| C | -2.99663400 | -0.71140800 | -0.09203100 |
| C | -3.30103900 | -1.20160800 | -1.37852700 |
| C | -3.68110100 | -1.19361400 | 1.04067000  |
| C | -4.23940200 | -2.22803400 | -1.50082400 |
| C | -4.61787500 | -2.21793000 | 0.86835100  |
| C | -4.88747300 | -2.74758900 | -0.38674800 |
| H | -4.46363600 | -2.62001300 | -2.48872700 |
| H | -5.14768900 | -2.59501400 | 1.73849700  |
| H | -5.61112200 | -3.54883500 | -0.49820300 |
| C | 2.99654800  | -0.71121200 | -0.09200100 |
| C | 3.68117700  | -1.19294900 | 1.04083600  |
| C | 3.30109400  | -1.20170600 | -1.37835100 |
| C | 4.61842200  | -2.21686300 | 0.86877200  |
| C | 4.23993100  | -2.22774500 | -1.50037600 |
| C | 4.88830100  | -2.74668200 | -0.38620200 |
| H | 5.14835700  | -2.59353400 | 1.73902400  |
| H | 4.46425800  | -2.61994100 | -2.48817600 |
| H | 5.61232500  | -3.54761500 | -0.49746200 |
| C | 3.47689400  | -0.61546700 | 2.42238900  |
| H | 3.29398900  | 0.46018700  | 2.39749600  |
| H | 2.63061600  | -1.07173900 | 2.94202200  |
| H | 4.36234900  | -0.78697600 | 3.03844000  |
| C | 2.67318100  | -0.61090200 | -2.61669800 |
| H | 1.64291800  | -0.30582900 | -2.44332900 |
| H | 3.22408700  | 0.27665700  | -2.95014000 |
| H | 2.68841300  | -1.32733500 | -3.44060600 |
| C | -3.47717900 | -0.61616200 | 2.42227800  |
| H | -2.63030500 | -1.07159500 | 2.94167000  |
| H | -3.29545100 | 0.45970100  | 2.39748500  |
| H | -4.36233300 | -0.78870100 | 3.03847000  |
| C | -2.67357800 | -0.60977500 | -2.61659800 |
| H | -3.22375600 | 0.27892300  | -2.94823100 |
| H | -1.64282800 | -0.30605200 | -2.44366100 |
| H | -2.69035600 | -1.32500300 | -3.44151700 |
| C | -0.00005200 | -1.81277400 | -0.69901300 |
| H | -0.00005300 | -1.60239200 | -1.77373400 |
| H | 0.88416400  | -2.41303800 | -0.47665400 |
| H | -0.88430900 | -2.41298500 | -0.47667200 |
| C | 0.00002700  | -1.33712400 | 1.89877000  |
| H | 0.91011300  | -1.92250600 | 1.87697000  |



|    |             |             |            |
|----|-------------|-------------|------------|
| H  | -0.90993100 | -1.92270400 | 1.87685200 |
| C  | -0.00014300 | -0.02482800 | 2.34924900 |
| H  | -0.91220500 | 0.46531900  | 2.66500400 |
| H  | 0.91178200  | 0.46553700  | 2.66506000 |
| Co | 0.00000200  | -0.03606600 | 0.27046500 |

**<sup>0</sup>Co(0)-2/3**

| Atom | x           | y           | z           |
|------|-------------|-------------|-------------|
| C    | 1.20267100  | 2.51469200  | -0.11794800 |
| C    | 1.19911600  | 3.90078100  | -0.24317400 |
| C    | -0.01311700 | 4.59487600  | -0.28465900 |
| C    | -1.22027700 | 3.89262000  | -0.21275600 |
| C    | -1.21133800 | 2.50702200  | -0.08870000 |
| N    | -0.00203400 | 1.83709900  | -0.02247200 |
| H    | -0.01800500 | 5.67388500  | -0.38872600 |
| H    | 2.13387100  | 4.44438400  | -0.31717200 |
| H    | -2.15950900 | 4.43086400  | -0.26442200 |
| C    | 2.30882400  | 1.62009000  | -0.11194000 |
| C    | -2.31224700 | 1.60430100  | -0.06306800 |
| N    | -1.94002400 | 0.32040400  | 0.03261500  |
| N    | 1.94116800  | 0.33534800  | -0.00238500 |
| C    | -3.74643300 | 2.03976700  | -0.17693800 |
| H    | -4.33349300 | 1.73932800  | 0.69631900  |
| H    | -3.82792200 | 3.12194100  | -0.27349100 |
| H    | -4.23558300 | 1.59138800  | -1.04721100 |
| C    | 3.73954800  | 2.05891200  | -0.24793100 |
| H    | 3.81197400  | 3.13163000  | -0.42525500 |
| H    | 4.32390400  | 1.83202600  | 0.64973200  |
| H    | 4.23774400  | 1.55120900  | -1.07900600 |
| C    | -2.94785500 | -0.68832700 | -0.10795000 |
| C    | -3.19626500 | -1.19004800 | -1.40541900 |
| C    | -3.66611000 | -1.18370400 | 0.99661100  |
| C    | -4.13289900 | -2.21130500 | -1.56773500 |
| C    | -4.59686800 | -2.20794700 | 0.78696900  |
| C    | -4.82675400 | -2.72887500 | -0.47874500 |
| H    | -4.32041200 | -2.60254200 | -2.56351700 |
| H    | -5.15440300 | -2.59125900 | 1.63715600  |
| H    | -5.55130400 | -3.52469200 | -0.61967600 |
| C    | 2.93663300  | -0.68542500 | -0.13031400 |
| C    | 3.67150400  | -1.14874900 | 0.97823400  |
| C    | 3.15539200  | -1.23734300 | -1.41294700 |
| C    | 4.57167600  | -2.20442400 | 0.79319400  |
| C    | 4.06023700  | -2.29055000 | -1.55002500 |
| C    | 4.75863900  | -2.78522400 | -0.45337600 |

|    |             |             |             |
|----|-------------|-------------|-------------|
| H  | 5.13921100  | -2.56496100 | 1.64694400  |
| H  | 4.22164700  | -2.72332500 | -2.53322200 |
| H  | 5.45680800  | -3.60741200 | -0.57491000 |
| C  | 3.55389900  | -0.53222900 | 2.35370800  |
| H  | 4.53779400  | -0.46844600 | 2.82601000  |
| H  | 3.13002500  | 0.47027500  | 2.32536300  |
| H  | 2.92227000  | -1.13023800 | 3.01781200  |
| C  | 2.46848300  | -0.67373300 | -2.63292700 |
| H  | 1.41999600  | -0.43814100 | -2.44563300 |
| H  | 2.93788600  | 0.26345100  | -2.95311400 |
| H  | 2.52680300  | -1.37049800 | -3.47162100 |
| C  | -3.48703200 | -0.64074900 | 2.39516100  |
| H  | -2.74129100 | -1.20909400 | 2.95898800  |
| H  | -3.16438000 | 0.40009900  | 2.39860800  |
| H  | -4.42503600 | -0.70540700 | 2.95202900  |
| C  | -2.47613600 | -0.62643700 | -2.60519300 |
| H  | -2.73563100 | 0.42281400  | -2.77900100 |
| H  | -1.39230100 | -0.65376200 | -2.47662700 |
| H  | -2.73043200 | -1.18481800 | -3.50829600 |
| C  | -0.01984700 | -2.09202300 | -0.11817500 |
| H  | 0.24016700  | -1.66638400 | -1.08894900 |
| H  | 0.68717500  | -2.89640300 | 0.06172700  |
| H  | -1.03004100 | -2.48515800 | -0.16483000 |
| C  | 0.11415100  | -1.53704200 | 1.79362100  |
| H  | 1.07016000  | -2.02291400 | 1.94453000  |
| H  | -0.71645000 | -2.19561100 | 2.02684000  |
| C  | 0.02451900  | -0.17463500 | 2.25275100  |
| H  | -0.90279400 | 0.17516900  | 2.68837900  |
| H  | 0.91037500  | 0.28805700  | 2.67067200  |
| Co | 0.00980500  | 0.06255000  | 0.31027000  |

**<sup>0</sup>Co(0)-3**

| Atom | x           | y          | z           |
|------|-------------|------------|-------------|
| C    | -1.19022100 | 2.69903200 | 0.09065500  |
| C    | -1.20735300 | 4.08769000 | 0.00535300  |
| C    | 0.00000000  | 4.79119800 | -0.02662900 |
| C    | 1.20735400  | 4.08769000 | 0.00535100  |
| C    | 1.19022200  | 2.69903200 | 0.09065400  |
| N    | 0.00000000  | 2.01600700 | 0.16461300  |
| H    | 0.00000000  | 5.87291900 | -0.09399800 |
| H    | -2.15153800 | 4.61892900 | -0.04276000 |
| H    | 2.15153900  | 4.61892800 | -0.04276300 |
| C    | -2.30446000 | 1.78299600 | 0.08871100  |

|   |             |             |             |
|---|-------------|-------------|-------------|
| C | 2.30446000  | 1.78299600  | 0.08871000  |
| N | 1.94226600  | 0.51438700  | 0.05862700  |
| N | -1.94226700 | 0.51438800  | 0.05862800  |
| C | 3.72183800  | 2.28156300  | 0.12352900  |
| H | 3.96964000  | 2.82413600  | -0.79484800 |
| H | 3.86562700  | 2.97785800  | 0.95474200  |
| H | 4.43392700  | 1.46611300  | 0.23464300  |
| C | -3.72183800 | 2.28156400  | 0.12353100  |
| H | -3.86562600 | 2.97785800  | 0.95474500  |
| H | -3.96963900 | 2.82413900  | -0.79484500 |
| H | -4.43392700 | 1.46611500  | 0.23464300  |
| C | 2.93470200  | -0.51700000 | 0.06980300  |
| C | 3.20928900  | -1.17556200 | 1.28220100  |
| C | 3.57632800  | -0.88764200 | -1.12540900 |
| C | 4.14833000  | -2.20879500 | 1.27967500  |
| C | 4.50493000  | -1.93131000 | -1.08214900 |
| C | 4.79362400  | -2.58913000 | 0.10766500  |
| H | 4.36988500  | -2.72251000 | 2.21060900  |
| H | 5.00217300  | -2.23128900 | -2.00003600 |
| H | 5.51507200  | -3.39987800 | 0.12111200  |
| C | -2.93470300 | -0.51699900 | 0.06980300  |
| C | -3.57632800 | -0.88764100 | -1.12540900 |
| C | -3.20928900 | -1.17556300 | 1.28220100  |
| C | -4.50492900 | -1.93131000 | -1.08215000 |
| C | -4.14833000 | -2.20879700 | 1.27967400  |
| C | -4.79362300 | -2.58913100 | 0.10766300  |
| H | -5.00217200 | -2.23128800 | -2.00003700 |
| H | -4.36988400 | -2.72251200 | 2.21060800  |
| H | -5.51507100 | -3.39987900 | 0.12111000  |
| C | -3.28783500 | -0.17559600 | -2.42416800 |
| H | -3.78451900 | 0.80004800  | -2.47138300 |
| H | -2.21902700 | 0.00185900  | -2.55616400 |
| H | -3.64496800 | -0.76086800 | -3.27382200 |
| C | -2.51468600 | -0.76865000 | 2.55763000  |
| H | -1.42689000 | -0.81983900 | 2.45470800  |
| H | -2.75036600 | 0.26212600  | 2.84046600  |
| H | -2.80881900 | -1.41710400 | 3.38517900  |
| C | 3.28783400  | -0.17559800 | -2.42416800 |
| H | 2.21902600  | 0.00185800  | -2.55616400 |
| H | 3.78451900  | 0.80004600  | -2.47138500 |
| H | 3.64496600  | -0.76087100 | -3.27382300 |
| C | 2.51468600  | -0.76864800 | 2.55763000  |
| H | 2.75036500  | 0.26212800  | 2.84046400  |

|    |             |             |             |
|----|-------------|-------------|-------------|
| H  | 1.42689000  | -0.81983800 | 2.45470800  |
| H  | 2.80882000  | -1.41710100 | 3.38518000  |
| C  | -0.00000100 | -1.52365300 | -0.97712000 |
| H  | -0.87897400 | -1.60105400 | -1.62855400 |
| H  | 0.87897200  | -1.60105400 | -1.62855500 |
| C  | 0.00000000  | -2.72839400 | -0.01594600 |
| H  | -0.87712800 | -2.69397500 | 0.64142400  |
| H  | 0.87712800  | -2.69397500 | 0.64142400  |
| C  | 0.00000000  | -4.08374500 | -0.74323900 |
| H  | -0.88312800 | -4.18430000 | -1.38210000 |
| H  | 0.88312900  | -4.18429900 | -1.38210000 |
| H  | 0.00000100  | -4.92387500 | -0.03852200 |
| Co | 0.00000000  | 0.20716300  | -0.01227000 |

**<sup>0</sup>Co(0)-4**

| Atom | x           | y           | z           |
|------|-------------|-------------|-------------|
| C    | 1.19275100  | 2.61014300  | -0.33263400 |
| C    | 1.20730800  | 3.96768400  | -0.64207700 |
| C    | -0.00007800 | 4.65222500  | -0.80238800 |
| C    | -1.20744000 | 3.96764600  | -0.64211300 |
| C    | -1.19283400 | 2.61010800  | -0.33265900 |
| N    | -0.00003400 | 1.94587300  | -0.18603900 |
| H    | -0.00009000 | 5.70686900  | -1.05273300 |
| H    | 2.14941800  | 4.48881100  | -0.76902000 |
| H    | -2.14957700 | 4.48872400  | -0.76908100 |
| C    | 2.31243600  | 1.72431600  | -0.17844500 |
| C    | -2.31249200 | 1.72429200  | -0.17840000 |
| N    | -1.97159000 | 0.47042400  | 0.09400400  |
| N    | 1.97157000  | 0.47044400  | 0.09393000  |
| C    | -3.72523100 | 2.20455800  | -0.37895600 |
| H    | -3.87081700 | 3.18817300  | 0.07327800  |
| H    | -3.96906800 | 2.29982500  | -1.44267900 |
| H    | -4.44804300 | 1.51985600  | 0.06160000  |
| C    | 3.72517800  | 2.20450600  | -0.37914100 |
| H    | 3.96947100  | 2.29813700  | -1.44290500 |
| H    | 3.87043300  | 3.18883000  | 0.07162900  |
| H    | 4.44791500  | 1.52058200  | 0.06276300  |
| C    | -2.99409200 | -0.53673100 | 0.02925500  |
| C    | -3.32213400 | -1.06059400 | -1.24174900 |
| C    | -3.65831100 | -0.99536000 | 1.18095300  |
| C    | -4.24858200 | -2.10052500 | -1.32086400 |
| C    | -4.58263100 | -2.03806800 | 1.05282800  |
| C    | -4.86738200 | -2.60359500 | -0.18137800 |
| H    | -4.48799500 | -2.51787800 | -2.29471700 |

|    |             |             |             |
|----|-------------|-------------|-------------|
| H  | -5.09137000 | -2.39827500 | 1.94312200  |
| H  | -5.57944500 | -3.41898900 | -0.25965100 |
| C  | 2.99410300  | -0.53667500 | 0.02904300  |
| C  | 3.65871900  | -0.99501400 | 1.18064100  |
| C  | 3.32172800  | -1.06085400 | -1.24193200 |
| C  | 4.58301700  | -2.03773000 | 1.05248300  |
| C  | 4.24816000  | -2.10080000 | -1.32107600 |
| C  | 4.86735300  | -2.60356900 | -0.18167400 |
| H  | 5.09204900  | -2.39771100 | 1.94270200  |
| H  | 4.48725500  | -2.51840600 | -2.29490000 |
| H  | 5.57939800  | -3.41897600 | -0.25998800 |
| C  | 3.48162500  | -0.35886300 | 2.53985600  |
| H  | 4.44112600  | 0.01779600  | 2.90899300  |
| H  | 2.78743200  | 0.47737200  | 2.52126500  |
| H  | 3.12264600  | -1.07932100 | 3.28044700  |
| C  | 2.73941800  | -0.48801100 | -2.51275900 |
| H  | 1.72090500  | -0.12736600 | -2.37455800 |
| H  | 3.33826200  | 0.35756500  | -2.87106700 |
| H  | 2.73501400  | -1.23457600 | -3.30960900 |
| C  | -3.48080400 | -0.35954100 | 2.54026200  |
| H  | -2.78689400 | 0.47693200  | 2.52157600  |
| H  | -4.44025700 | 0.01670100  | 2.90993800  |
| H  | -3.12123900 | -1.08008500 | 3.28048400  |
| C  | -2.74014700 | -0.48742000 | -2.51257500 |
| H  | -3.33847600 | 0.35888600  | -2.87000400 |
| H  | -1.72124700 | -0.12770700 | -2.37474100 |
| H  | -2.73683000 | -1.23350600 | -3.30987900 |
| C  | 0.00008800  | -1.83897800 | 0.26567200  |
| H  | 0.87775900  | -2.23092700 | 0.79361700  |
| H  | -0.87649700 | -2.23164800 | 0.79489000  |
| C  | -0.00071000 | -2.42723000 | -1.14796100 |
| H  | 0.87219300  | -2.08721400 | -1.70964100 |
| H  | -0.87520000 | -2.08858500 | -1.70798300 |
| C  | 0.00045300  | -3.96580600 | -1.14534300 |
| H  | 0.88399000  | -4.35765600 | -0.63106300 |
| H  | -0.88156400 | -4.35896900 | -0.62945200 |
| H  | -0.00018500 | -4.37424300 | -2.16312700 |
| Co | -0.00008600 | 0.20227700  | 0.46109500  |
| C  | 0.00044700  | -0.39268200 | 2.48610800  |
| H  | 0.91095600  | -0.94173900 | 2.67441100  |
| H  | -0.90972500 | -0.94202200 | 2.67521600  |
| C  | 0.00020600  | 0.98432100  | 2.40666100  |
| H  | -0.91235900 | 1.56059600  | 2.51044600  |

|                              |             |             |             |
|------------------------------|-------------|-------------|-------------|
| H                            | 0.91261800  | 1.56095000  | 2.50977300  |
| <b><sup>0</sup>Co(0)-4/5</b> |             |             |             |
| Atom                         | x           | y           | z           |
| C                            | 1.22933400  | 2.61767600  | -0.26830000 |
| C                            | 1.25028100  | 3.98570500  | -0.52148400 |
| C                            | 0.05165800  | 4.69127000  | -0.65674600 |
| C                            | -1.16445300 | 4.01638800  | -0.52959700 |
| C                            | -1.17942600 | 2.64810800  | -0.27525200 |
| N                            | 0.01674300  | 1.96083100  | -0.14904000 |
| H                            | 0.06590600  | 5.75507800  | -0.86436400 |
| H                            | 2.19488800  | 4.50686900  | -0.62086600 |
| H                            | -2.09557200 | 4.56035300  | -0.63515900 |
| C                            | 2.33234600  | 1.72976800  | -0.14138300 |
| C                            | -2.30157000 | 1.78617900  | -0.15321400 |
| N                            | -1.96636800 | 0.50619400  | 0.06923800  |
| N                            | 1.97313500  | 0.45417500  | 0.06147000  |
| C                            | -3.72356300 | 2.25078200  | -0.30188400 |
| H                            | -3.78156800 | 3.33433800  | -0.39889400 |
| H                            | -4.20438500 | 1.81429900  | -1.18306700 |
| H                            | -4.33415200 | 1.96164200  | 0.55838200  |
| C                            | 3.76545000  | 2.17466900  | -0.24027400 |
| H                            | 4.29570800  | 1.67053000  | -1.05346300 |
| H                            | 3.84101500  | 3.24760600  | -0.41217100 |
| H                            | 4.31747500  | 1.94753100  | 0.67709500  |
| C                            | -3.01717700 | -0.46665600 | 0.00311500  |
| C                            | -3.34439800 | -1.01208300 | -1.25818300 |
| C                            | -3.71243500 | -0.88160200 | 1.15747900  |
| C                            | -4.31785300 | -2.01172200 | -1.33022900 |
| C                            | -4.68576100 | -1.87757100 | 1.03655200  |
| C                            | -4.98190600 | -2.45359800 | -0.19253100 |
| H                            | -4.56004800 | -2.44103500 | -2.29843300 |
| H                            | -5.22255200 | -2.19767600 | 1.92524400  |
| H                            | -5.73560800 | -3.23128500 | -0.26513000 |
| C                            | 3.01350200  | -0.53221000 | -0.01317100 |
| C                            | 3.71905900  | -0.97606600 | 1.12130500  |
| C                            | 3.33718500  | -1.04602100 | -1.29300500 |
| C                            | 4.66630400  | -1.99672800 | 0.97115600  |
| C                            | 4.29420900  | -2.05509200 | -1.39668900 |
| C                            | 4.94606300  | -2.54764200 | -0.27003800 |
| H                            | 5.20207700  | -2.34585600 | 1.85011300  |
| H                            | 4.53003000  | -2.45915000 | -2.37705900 |
| H                            | 5.68067900  | -3.34105300 | -0.36520200 |
| C                            | 3.56969600  | -0.34045100 | 2.48423900  |

|    |             |             |             |
|----|-------------|-------------|-------------|
| H  | 4.52380300  | 0.09128700  | 2.80433700  |
| H  | 2.82996000  | 0.45503600  | 2.49211500  |
| H  | 3.28691700  | -1.07123800 | 3.24766300  |
| C  | 2.69474100  | -0.49382200 | -2.54270200 |
| H  | 1.63204900  | -0.29658200 | -2.40355000 |
| H  | 3.15216300  | 0.45769900  | -2.83633200 |
| H  | 2.81645200  | -1.18346500 | -3.38066700 |
| C  | -3.45703200 | -0.27035500 | 2.51435000  |
| H  | -2.64374100 | -0.77466600 | 3.04377400  |
| H  | -3.18656600 | 0.78376300  | 2.44732200  |
| H  | -4.34685200 | -0.35173400 | 3.14289900  |
| C  | -2.70759200 | -0.50850200 | -2.53176000 |
| H  | -3.29359500 | 0.31051000  | -2.96538700 |
| H  | -1.70294400 | -0.12230700 | -2.36545300 |
| H  | -2.65899100 | -1.29867800 | -3.28455200 |
| C  | -0.26394400 | -2.08033900 | 0.56326300  |
| H  | 0.15476000  | -2.90690900 | 1.13782600  |
| H  | -1.34505000 | -2.14813200 | 0.65722900  |
| C  | 0.15486500  | -2.33636800 | -0.89142100 |
| H  | 1.23801200  | -2.28354900 | -0.98806100 |
| H  | -0.26457800 | -1.58970200 | -1.56665300 |
| C  | -0.31267400 | -3.73218900 | -1.34051300 |
| H  | 0.12817800  | -4.51804700 | -0.71880900 |
| H  | -1.40027700 | -3.82877000 | -1.27780000 |
| H  | -0.01802000 | -3.92725000 | -2.37695000 |
| Co | -0.01036400 | 0.23501600  | 0.40592800  |
| C  | 0.17555700  | -1.03086500 | 2.20052200  |
| H  | 1.16910800  | -1.43156900 | 2.35658400  |
| H  | -0.58191400 | -1.63404700 | 2.69114000  |
| C  | 0.03897300  | 0.40172600  | 2.33356100  |
| H  | -0.89140400 | 0.79509600  | 2.72711100  |
| H  | 0.90725100  | 0.98290500  | 2.62445400  |

**<sup>0</sup>Co(0)-5**

| Atom | x           | y           | z           |
|------|-------------|-------------|-------------|
| C    | 1.19080900  | -3.06892500 | 0.04151500  |
| C    | 1.20743800  | -4.45501400 | -0.07766500 |
| C    | 0.00000500  | -5.15755700 | -0.12643500 |
| C    | -1.20742900 | -4.45501700 | -0.07766200 |
| C    | -1.19080300 | -3.06892700 | 0.04151700  |
| N    | 0.00000300  | -2.38788700 | 0.13356400  |
| H    | 0.00000600  | -6.23729200 | -0.22034200 |
| H    | 2.15155800  | -4.98499400 | -0.13936100 |
| H    | -2.15154800 | -4.98499900 | -0.13935600 |

|   |             |             |             |
|---|-------------|-------------|-------------|
| C | 2.30475700  | -2.15342900 | 0.06080000  |
| C | -2.30475300 | -2.15343400 | 0.06080100  |
| N | -1.94201300 | -0.88422900 | 0.05837800  |
| N | 1.94201500  | -0.88422500 | 0.05837800  |
| C | -3.72241100 | -2.65181300 | 0.08702100  |
| H | -3.97238900 | -3.17361100 | -0.84270800 |
| H | -3.86542400 | -3.36612900 | 0.90291600  |
| H | -4.43371500 | -1.83848700 | 0.21742400  |
| C | 3.72241600  | -2.65180500 | 0.08701700  |
| H | 3.86542700  | -3.36613500 | 0.90290100  |
| H | 3.97239900  | -3.17358800 | -0.84272000 |
| H | 4.43371800  | -1.83848100 | 0.21743600  |
| C | -2.93201500 | 0.14850800  | 0.09642900  |
| C | -3.19294400 | 0.78662600  | 1.32294600  |
| C | -3.58378700 | 0.54278900  | -1.08575300 |
| C | -4.12780400 | 1.82329600  | 1.34770000  |
| C | -4.50777800 | 1.58919900  | -1.01513000 |
| C | -4.78246200 | 2.22710400  | 0.18867800  |
| H | -4.33902100 | 2.32078200  | 2.28977700  |
| H | -5.01263300 | 1.90717700  | -1.92275600 |
| H | -5.50082600 | 3.03996500  | 0.22341400  |
| C | 2.93201500  | 0.14851300  | 0.09643000  |
| C | 3.58378900  | 0.54279500  | -1.08575000 |
| C | 3.19293900  | 0.78663300  | 1.32294800  |
| C | 4.50777800  | 1.58920700  | -1.01512400 |
| C | 4.12779700  | 1.82330500  | 1.34770400  |
| C | 4.78245800  | 2.22711400  | 0.18868300  |
| H | 5.01263500  | 1.90718600  | -1.92274900 |
| H | 4.33900900  | 2.32079300  | 2.28978200  |
| H | 5.50082000  | 3.03997600  | 0.22342100  |
| C | 3.31267500  | -0.14731900 | -2.40009000 |
| H | 3.83003300  | -1.11109200 | -2.46629400 |
| H | 2.24829200  | -0.34397900 | -2.53926300 |
| H | 3.65987200  | 0.46303300  | -3.23611700 |
| C | 2.48785100  | 0.35521800  | 2.58449400  |
| H | 1.40091600  | 0.41025500  | 2.47423400  |
| H | 2.71954900  | -0.68144800 | 2.84816300  |
| H | 2.77635900  | 0.98649700  | 3.42716700  |
| C | -3.31266600 | -0.14732500 | -2.40009200 |
| H | -2.24828000 | -0.34396400 | -2.53927100 |
| H | -3.83000400 | -1.11110800 | -2.46629000 |
| H | -3.65988100 | 0.46301700  | -3.23612000 |
| C | -2.48785800 | 0.35521100  | 2.58449400  |



|    |             |             |             |
|----|-------------|-------------|-------------|
| H  | -2.71955700 | -0.68145500 | 2.84816200  |
| H  | -1.40092300 | 0.41024800  | 2.47423700  |
| H  | -2.77636900 | 0.98649000  | 3.42716600  |
| C  | 0.00000100  | 1.15303200  | -0.97333600 |
| H  | 0.87909900  | 1.23026900  | -1.62398300 |
| H  | -0.87909700 | 1.23026900  | -1.62398200 |
| C  | -0.00000100 | 2.35299600  | -0.00662200 |
| H  | 0.87769100  | 2.31591900  | 0.65116800  |
| H  | -0.87769300 | 2.31591400  | 0.65116800  |
| C  | -0.00000400 | 3.71685900  | -0.72255600 |
| H  | 0.87690100  | 3.77327500  | -1.38069100 |
| H  | -0.87690900 | 3.77327100  | -1.38069100 |
| Co | 0.00000000  | -0.57766200 | -0.01012800 |
| C  | -0.00000700 | 4.91800300  | 0.22953300  |
| H  | -0.87599200 | 4.85769300  | 0.88791400  |
| H  | 0.87597800  | 4.85769600  | 0.88791500  |
| C  | -0.00000900 | 6.26771400  | -0.49338600 |
| H  | -0.00001400 | 7.10515100  | 0.21132900  |
| H  | 0.88187700  | 6.37591500  | -1.13320300 |
| H  | -0.88189200 | 6.37590800  | -1.13320900 |

**<sup>0</sup>Co(0)-6**

| Atom | x           | y          | z           |
|------|-------------|------------|-------------|
| C    | 1.05483200  | 2.70133200 | 0.24281300  |
| C    | 1.01042000  | 4.07671600 | 0.46290800  |
| C    | -0.22051900 | 4.72060100 | 0.58758400  |
| C    | -1.39729700 | 3.97294300 | 0.48938000  |
| C    | -1.32673800 | 2.60202600 | 0.26746900  |
| N    | -0.11004200 | 1.97282600 | 0.14337600  |
| H    | -0.26392400 | 5.78886400 | 0.76548700  |
| H    | 1.92897800  | 4.64539000 | 0.54787600  |
| H    | -2.36025400 | 4.45909100 | 0.59590600  |
| C    | 2.20854600  | 1.85958900 | 0.13999200  |
| C    | -2.41907600 | 1.67394000 | 0.18450100  |
| N    | -2.04715000 | 0.42015200 | -0.01899100 |
| N    | 1.92057800  | 0.57745500 | -0.05500800 |
| C    | -3.84224100 | 2.12619000 | 0.38486800  |
| H    | -4.05834800 | 2.28355200 | 1.44729800  |
| H    | -4.02955200 | 3.07343200 | -0.12532200 |
| H    | -4.55642800 | 1.39411000 | 0.01295500  |
| C    | 3.60596600  | 2.38976000 | 0.31959100  |
| H    | 3.66189300  | 3.45078200 | 0.07465700  |
| H    | 3.94437000  | 2.27436100 | 1.35501300  |
| H    | 4.32293000  | 1.86072600 | -0.30829100 |

|   |             |             |             |
|---|-------------|-------------|-------------|
| C | -3.05736300 | -0.59969900 | 0.03143300  |
| C | -3.75682700 | -0.99748800 | -1.12441500 |
| C | -3.33597400 | -1.19156000 | 1.28102400  |
| C | -4.68679800 | -2.03679200 | -1.01568300 |
| C | -4.26925300 | -2.22836600 | 1.33988500  |
| C | -4.93443900 | -2.66227200 | 0.19943500  |
| H | -5.22981800 | -2.34881700 | -1.90320000 |
| H | -4.47488600 | -2.69723900 | 2.29773100  |
| H | -5.65407800 | -3.47247400 | 0.26023300  |
| C | 3.00612900  | -0.36061000 | -0.00114500 |
| C | 3.36887400  | -0.89253800 | 1.25296200  |
| C | 3.70297400  | -0.73363700 | -1.16800600 |
| C | 4.37542200  | -1.85984300 | 1.30511300  |
| C | 4.70941500  | -1.69799800 | -1.06527500 |
| C | 5.03593800  | -2.27480100 | 0.15590400  |
| H | 4.64379200  | -2.28716800 | 2.26712200  |
| H | 5.24774700  | -1.99216000 | -1.96177800 |
| H | 5.81309900  | -3.03025100 | 0.21323900  |
| C | 2.73900600  | -0.41158800 | 2.53873700  |
| H | 3.32770400  | 0.40130800  | 2.98061500  |
| H | 1.72927700  | -0.03506200 | 2.38739100  |
| H | 2.69997700  | -1.21418800 | 3.27855000  |
| C | 3.43260100  | -0.09685600 | -2.51127100 |
| H | 2.58816100  | -0.55783100 | -3.02907900 |
| H | 3.20873300  | 0.96803400  | -2.42549300 |
| H | 4.30371200  | -0.20135400 | -3.16170200 |
| C | -2.67272100 | -0.70022200 | 2.54437100  |
| H | -1.61272800 | -0.49787300 | 2.39293400  |
| H | -3.13080700 | 0.23123900  | 2.89675500  |
| H | -2.77375800 | -1.43417100 | 3.34630300  |
| C | -3.58091100 | -0.30832900 | -2.45757200 |
| H | -3.48643000 | 0.77444800  | -2.35167000 |
| H | -2.69350700 | -0.65381500 | -2.99259600 |
| H | -4.44151700 | -0.50334000 | -3.10086000 |
| C | 0.01746400  | -1.71164600 | 0.49164300  |
| H | 0.40739700  | -1.49383700 | 1.49370900  |
| H | -1.03356900 | -1.97860800 | 0.61541800  |
| C | 0.74302300  | -2.93908500 | -0.06125600 |
| H | 1.78000800  | -2.70767800 | -0.32366600 |
| H | 0.26362800  | -3.27558600 | -0.98798000 |
| C | 0.74424600  | -4.11921000 | 0.92360400  |
| H | 1.26110400  | -3.85902200 | 1.85314600  |
| H | -0.27631100 | -4.41472000 | 1.18880600  |

|    |             |             |             |
|----|-------------|-------------|-------------|
| H  | 1.24632400  | -4.99723100 | 0.50141600  |
| Co | -0.03243600 | 0.17985100  | -0.31992400 |
| C  | -0.05366100 | -0.88622000 | -2.10189800 |
| H  | 0.87072400  | -1.43654700 | -2.20468700 |
| H  | -0.94423300 | -1.50124200 | -2.12861900 |
| C  | -0.10707000 | 0.47465800  | -2.36747400 |
| H  | -1.04282300 | 0.97496300  | -2.58278200 |
| H  | 0.78168400  | 1.02693600  | -2.64788700 |

**<sup>0</sup>Co(0)-TS6/7**

| Atom | x           | y           | z           |
|------|-------------|-------------|-------------|
| C    | 1.16009900  | 2.70705900  | -0.02135400 |
| C    | 1.17633700  | 4.09369400  | -0.13443700 |
| C    | -0.03424900 | 4.78585000  | -0.24347500 |
| C    | -1.24041400 | 4.08222200  | -0.23516900 |
| C    | -1.22621100 | 2.69330200  | -0.11457400 |
| N    | -0.03045100 | 2.02822100  | -0.00488300 |
| H    | -0.03664100 | 5.86617600  | -0.33371600 |
| H    | 2.11583300  | 4.63464300  | -0.14098600 |
| H    | -2.17776300 | 4.61927300  | -0.32078100 |
| C    | 2.27978500  | 1.81099300  | 0.12766500  |
| C    | -2.33525600 | 1.77930900  | -0.03776400 |
| N    | -1.97031900 | 0.50380700  | 0.03178100  |
| N    | 1.93803300  | 0.53172700  | 0.15815100  |
| C    | -3.76377800 | 2.24264500  | 0.04784500  |
| H    | -4.18458000 | 2.04453000  | 1.03916900  |
| H    | -3.84983100 | 3.31264100  | -0.13887800 |
| H    | -4.40323800 | 1.72258900  | -0.66921000 |
| C    | 3.68578500  | 2.32809400  | 0.26748200  |
| H    | 4.33325000  | 1.59863700  | 0.75287900  |
| H    | 4.12565700  | 2.55587600  | -0.71012500 |
| H    | 3.70972000  | 3.24791400  | 0.85539400  |
| C    | -2.98869000 | -0.46717100 | 0.31238600  |
| C    | -3.69885000 | -1.10099600 | -0.72318200 |
| C    | -3.24425600 | -0.78547200 | 1.66142800  |
| C    | -4.66682600 | -2.05163500 | -0.38536700 |
| C    | -4.21761800 | -1.74347000 | 1.95294200  |
| C    | -4.92875000 | -2.37611200 | 0.94000600  |
| H    | -5.22157100 | -2.54174600 | -1.18041100 |
| H    | -4.41514500 | -1.99508900 | 2.99095000  |
| H    | -5.68231000 | -3.11880000 | 1.18225800  |
| C    | 2.93906400  | -0.45852100 | 0.42816000  |
| C    | 3.03455200  | -0.96084900 | 1.74436500  |
| C    | 3.79111600  | -0.93593800 | -0.58428000 |

|    |             |             |             |
|----|-------------|-------------|-------------|
| C  | 3.95584900  | -1.97439600 | 2.01061000  |
| C  | 4.69721100  | -1.95553700 | -0.27219000 |
| C  | 4.77786400  | -2.48197900 | 1.00938200  |
| H  | 4.02827700  | -2.36801500 | 3.02026200  |
| H  | 5.35008300  | -2.33332200 | -1.05436800 |
| H  | 5.48242200  | -3.27725100 | 1.23127300  |
| C  | 2.20061700  | -0.38466000 | 2.86192600  |
| H  | 2.53251900  | 0.62575800  | 3.12543300  |
| H  | 1.14901400  | -0.30197600 | 2.58353400  |
| H  | 2.27567300  | -1.00031700 | 3.76046300  |
| C  | 3.80250900  | -0.35172700 | -1.97638600 |
| H  | 2.88555700  | 0.18345700  | -2.20984400 |
| H  | 4.63338700  | 0.35363500  | -2.09373300 |
| H  | 3.94315900  | -1.13261300 | -2.72795700 |
| C  | -2.47762400 | -0.11879900 | 2.77614800  |
| H  | -1.40078200 | -0.25466200 | 2.65015200  |
| H  | -2.65023900 | 0.96153500  | 2.80867700  |
| H  | -2.76599400 | -0.53015600 | 3.74552600  |
| C  | -3.42869500 | -0.79482800 | -2.17463700 |
| H  | -3.38000200 | 0.27808700  | -2.37478900 |
| H  | -2.47216100 | -1.21612900 | -2.49168000 |
| H  | -4.20790100 | -1.21911000 | -2.81119300 |
| C  | -0.03972900 | -1.88105500 | 0.07737800  |
| H  | 0.57088100  | -1.85845200 | 0.98559000  |
| H  | -1.07303100 | -2.13026500 | 0.32506000  |
| C  | 0.51798400  | -2.79546900 | -0.90852200 |
| H  | 1.59244800  | -2.97361900 | -0.81725800 |
| H  | 0.53763100  | -2.10700400 | -1.99947300 |
| C  | -0.25163000 | -4.03927400 | -1.31821100 |
| H  | -0.23153700 | -4.78174100 | -0.51217700 |
| H  | -1.30283800 | -3.80697600 | -1.51350000 |
| H  | 0.16851300  | -4.51277700 | -2.21196100 |
| Co | -0.01213900 | 0.18622700  | -0.18740400 |
| C  | 0.40216800  | -1.16340600 | -2.96598400 |
| H  | 1.37940200  | -1.28651500 | -3.42935700 |
| H  | -0.38543900 | -1.67345300 | -3.52117200 |
| C  | 0.09479300  | 0.07112300  | -2.30857600 |
| H  | -0.90108400 | 0.46046900  | -2.50161900 |
| H  | 0.85662100  | 0.84235400  | -2.40955600 |

**<sup>0</sup>Co(0)-7**

| Atom | x           | y          | z           |
|------|-------------|------------|-------------|
| C    | -1.26036600 | 2.52471000 | -0.11679000 |
| C    | -1.28219500 | 3.91904200 | -0.10824300 |

|   |             |             |             |
|---|-------------|-------------|-------------|
| C | -0.08748600 | 4.63612900  | -0.15715300 |
| C | 1.12707300  | 3.94420800  | -0.17991600 |
| C | 1.12715400  | 2.55454000  | -0.18288600 |
| N | -0.05733700 | 1.85238900  | -0.20222500 |
| H | -0.10032100 | 5.71994900  | -0.15566900 |
| H | -2.22616100 | 4.44894000  | -0.06050300 |
| H | 2.06562500  | 4.48701600  | -0.18976300 |
| C | -2.36243400 | 1.61848000  | -0.07755400 |
| C | 2.26147900  | 1.68360100  | -0.20050800 |
| N | 1.94864800  | 0.39538400  | -0.11022400 |
| N | -1.99663300 | 0.33769900  | -0.03108500 |
| C | 3.65736700  | 2.22914400  | -0.35632200 |
| H | 3.72228300  | 2.90544200  | -1.21314300 |
| H | 3.95564700  | 2.80126900  | 0.52840200  |
| H | 4.38919600  | 1.43695600  | -0.49935800 |
| C | -3.79735800 | 2.06699500  | -0.13231200 |
| H | -3.88012400 | 3.15074800  | -0.05969600 |
| H | -4.28104200 | 1.76090400  | -1.06480400 |
| H | -4.38282200 | 1.63120900  | 0.68117400  |
| C | 2.99931900  | -0.56225200 | -0.31067200 |
| C | 3.78613800  | -1.00522400 | 0.76816000  |
| C | 3.23989200  | -1.03171100 | -1.61859500 |
| C | 4.77084600  | -1.96782400 | 0.52933700  |
| C | 4.23017500  | -1.99883700 | -1.81090100 |
| C | 4.98687000  | -2.47525000 | -0.74639200 |
| H | 5.37406100  | -2.32046900 | 1.36107300  |
| H | 4.41198800  | -2.37395700 | -2.81397200 |
| H | 5.74865800  | -3.23038700 | -0.91253700 |
| C | -3.02274900 | -0.64358100 | -0.24419400 |
| C | -3.33762600 | -0.99089100 | -1.57932700 |
| C | -3.70153900 | -1.24953800 | 0.82801400  |
| C | -4.29504900 | -1.97935500 | -1.80930400 |
| C | -4.65605800 | -2.23438000 | 0.54946300  |
| C | -4.94842900 | -2.60810100 | -0.75410300 |
| H | -4.53164000 | -2.25595400 | -2.83279700 |
| H | -5.17931900 | -2.70464700 | 1.37772900  |
| H | -5.68753600 | -3.37840800 | -0.95039100 |
| C | -2.68978100 | -0.29036900 | -2.75052500 |
| H | -3.18149500 | 0.66557300  | -2.96477900 |
| H | -1.63930500 | -0.06312500 | -2.56485300 |
| H | -2.76242800 | -0.89830500 | -3.65484700 |
| C | -3.47593900 | -0.84032700 | 2.26340500  |
| H | -2.71882100 | -0.06672800 | 2.35636800  |

|    |             |             |             |
|----|-------------|-------------|-------------|
| H  | -4.40398200 | -0.46180100 | 2.70484700  |
| H  | -3.16244300 | -1.69133300 | 2.87516400  |
| C  | 2.50193700  | -0.46337200 | -2.80670700 |
| H  | 1.45008900  | -0.27846800 | -2.58739600 |
| H  | 2.93297200  | 0.49784400  | -3.10974600 |
| H  | 2.56954800  | -1.13375600 | -3.66624700 |
| C  | 3.61769400  | -0.42525800 | 2.14861700  |
| H  | 4.15946100  | 0.52295600  | 2.24470100  |
| H  | 2.57441200  | -0.21840500 | 2.37433700  |
| H  | 4.01282000  | -1.10127200 | 2.90993100  |
| C  | -0.07133800 | -1.87968000 | -0.72554700 |
| H  | -0.95626700 | -1.80247200 | -1.33963200 |
| H  | 0.85342000  | -2.08615100 | -1.25163600 |
| C  | -0.15212600 | -2.13042700 | 0.62345200  |
| H  | -1.13745500 | -2.16512400 | 1.07688800  |
| H  | -0.80541400 | -1.12418900 | 3.30255200  |
| C  | 0.92163500  | -2.87741800 | 1.37130800  |
| H  | 0.62643400  | -3.93274600 | 1.44233400  |
| H  | 1.87881700  | -2.84697100 | 0.85227800  |
| H  | 1.06818800  | -2.52468700 | 2.39085200  |
| Co | -0.02051000 | 0.06810100  | 0.20532500  |
| C  | -0.05220000 | -0.33722900 | 3.38427000  |
| H  | -0.27363800 | 0.21362300  | 4.31043900  |
| H  | 0.90848400  | -0.82990100 | 3.54846200  |
| C  | -0.03593600 | 0.61041700  | 2.18957900  |
| H  | 0.82793400  | 1.28041800  | 2.26541500  |
| H  | -0.92263700 | 1.25193000  | 2.22388300  |

**<sup>0</sup>Co(0)-8**

| Atom | x           | y          | z           |
|------|-------------|------------|-------------|
| C    | 1.19171000  | 2.55097400 | -0.18993400 |
| C    | 1.20737200  | 3.94145400 | -0.15270900 |
| C    | -0.00000800 | 4.64595300 | -0.14650800 |
| C    | -1.20738400 | 3.94144800 | -0.15270600 |
| C    | -1.19171300 | 2.55096800 | -0.18993200 |
| N    | 0.00000000  | 1.86462500 | -0.24592500 |
| H    | -0.00001000 | 5.72931100 | -0.11561100 |
| H    | 2.15141400  | 4.47424600 | -0.11999300 |
| H    | -2.15142800 | 4.47423400 | -0.11998500 |
| C    | 2.30473100  | 1.63764900 | -0.14610000 |
| C    | -2.30473300 | 1.63763700 | -0.14609900 |
| N    | -1.94131000 | 0.37034000 | -0.06187900 |
| N    | 1.94131000  | 0.37035000 | -0.06186600 |
| C    | -3.72280400 | 2.13312900 | -0.20101700 |

|   |             |             |             |
|---|-------------|-------------|-------------|
| H | -3.97752100 | 2.69855300  | 0.70164300  |
| H | -3.86328100 | 2.80715500  | -1.05074200 |
| H | -4.43332400 | 1.31401200  | -0.29467100 |
| C | 3.72280000  | 2.13314500  | -0.20103800 |
| H | 3.86328000  | 2.80711400  | -1.05080800 |
| H | 3.97750600  | 2.69863200  | 0.70158500  |
| H | 4.43332500  | 1.31402600  | -0.29463100 |
| C | -2.92978900 | -0.66328800 | -0.02294900 |
| C | -3.18077200 | -1.39988800 | -1.19559800 |
| C | -3.59150600 | -0.96131200 | 1.18188900  |
| C | -4.11539100 | -2.43552500 | -1.14378600 |
| C | -4.51334400 | -2.01195000 | 1.18932700  |
| C | -4.77867800 | -2.74514800 | 0.03910100  |
| H | -4.31933000 | -3.00762400 | -2.04421900 |
| H | -5.02432900 | -2.25663400 | 2.11608900  |
| H | -5.49591200 | -3.55935700 | 0.06476400  |
| C | 2.92979100  | -0.66327500 | -0.02293000 |
| C | 3.59146800  | -0.96133000 | 1.18192400  |
| C | 3.18081000  | -1.39985100 | -1.19558700 |
| C | 4.51331300  | -2.01196100 | 1.18936300  |
| C | 4.11543300  | -2.43548400 | -1.14377100 |
| C | 4.77868900  | -2.74512900 | 0.03912800  |
| H | 5.02427000  | -2.25666600 | 2.11613500  |
| H | 4.31939900  | -3.00756300 | -2.04421100 |
| H | 5.49592800  | -3.55933300 | 0.06479300  |
| C | 3.33425200  | -0.16570700 | 2.43818500  |
| H | 3.88915200  | 0.77929700  | 2.43853500  |
| H | 2.27759800  | 0.08204200  | 2.54934900  |
| H | 3.64958600  | -0.72434800 | 3.32171900  |
| C | 2.46575000  | -1.07246100 | -2.48257400 |
| H | 1.38005300  | -1.14119200 | -2.36653200 |
| H | 2.67602500  | -0.05276700 | -2.81923700 |
| H | 2.76522500  | -1.75651000 | -3.27897700 |
| C | -3.33434700 | -0.16563900 | 2.43813000  |
| H | -2.27770800 | 0.08216900  | 2.54930400  |
| H | -3.88929600 | 0.77933700  | 2.43844000  |
| H | -3.64966600 | -0.72426700 | 3.32167700  |
| C | -2.46568700 | -1.07251100 | -2.48257500 |
| H | -2.67594400 | -0.05281500 | -2.81924200 |
| H | -1.37999200 | -1.14125400 | -2.36651400 |
| H | -2.76515600 | -1.75655800 | -3.27898100 |
| C | 0.00001900  | -1.54644500 | 1.16670300  |
| H | 0.87925800  | -1.56732200 | 1.81910000  |

|    |             |             |             |
|----|-------------|-------------|-------------|
| H  | -0.87920400 | -1.56729800 | 1.81912300  |
| C  | -0.00000800 | -2.81636700 | 0.29254900  |
| H  | 0.88365600  | -2.88065000 | -0.35026600 |
| H  | -0.88369500 | -2.88063500 | -0.35023600 |
| Co | 0.00001100  | 0.07221600  | 0.02890300  |
| H  | -0.00000600 | -3.72888000 | 0.90699500  |

**<sup>0</sup>Co(0)-TS3/9**

| Atom | x           | y           | z           |
|------|-------------|-------------|-------------|
| C    | -1.14806300 | 2.57073500  | 0.06427900  |
| C    | -1.14032900 | 3.96128900  | 0.08726200  |
| C    | 0.07196200  | 4.65397900  | 0.11689200  |
| C    | 1.27039900  | 3.93797000  | 0.11188700  |
| C    | 1.25180400  | 2.54726100  | 0.08769200  |
| N    | 0.04433400  | 1.86685500  | 0.07855600  |
| H    | 0.08235000  | 5.73763100  | 0.13278400  |
| H    | -2.07386100 | 4.51137300  | 0.07970500  |
| H    | 2.21474700  | 4.46934500  | 0.12332500  |
| C    | -2.26512300 | 1.69098400  | 0.00045500  |
| C    | 2.35319800  | 1.64732700  | 0.04739600  |
| N    | 1.98553300  | 0.36714900  | -0.00668200 |
| N    | -1.92422100 | 0.40209300  | -0.03366300 |
| C    | 3.78859600  | 2.09511900  | 0.05452100  |
| H    | 3.86810800  | 3.17976800  | -0.00569900 |
| H    | 4.30660800  | 1.77542700  | 0.96392900  |
| H    | 4.34557400  | 1.67308800  | -0.78598100 |
| C    | -3.68903300 | 2.17273900  | -0.04944900 |
| H    | -3.73892300 | 3.25843000  | -0.12061300 |
| H    | -4.22222500 | 1.75821800  | -0.90900900 |
| H    | -4.25151400 | 1.87314400  | 0.83977100  |
| C    | 3.02062900  | -0.61907000 | -0.08229800 |
| C    | 3.57686700  | -1.15311600 | 1.09778300  |
| C    | 3.45938900  | -1.05245000 | -1.34957600 |
| C    | 4.55614000  | -2.14379600 | 0.98481900  |
| C    | 4.44117100  | -2.04487400 | -1.41406200 |
| C    | 4.98508500  | -2.59359800 | -0.25872400 |
| H    | 4.98604100  | -2.56503300 | 1.88913300  |
| H    | 4.78084600  | -2.38816200 | -2.38709500 |
| H    | 5.74215800  | -3.36847100 | -0.32683200 |
| C    | -2.99182000 | -0.54820700 | -0.12362000 |
| C    | -3.39586500 | -1.00582200 | -1.39366900 |
| C    | -3.62951300 | -1.00338200 | 1.04675600  |
| C    | -4.42409700 | -1.94932900 | -1.46786900 |
| C    | -4.65691500 | -1.94309300 | 0.92471800  |



|    |             |             |             |
|----|-------------|-------------|-------------|
| C  | -5.05112000 | -2.42055400 | -0.31999300 |
| H  | -4.73666800 | -2.31305200 | -2.44253400 |
| H  | -5.14886300 | -2.30558000 | 1.82288800  |
| H  | -5.84608500 | -3.15581200 | -0.39538000 |
| C  | -2.77507800 | -0.45709100 | -2.65519100 |
| H  | -3.17025700 | 0.53763900  | -2.89114500 |
| H  | -1.69402600 | -0.34744200 | -2.56104800 |
| H  | -2.99068700 | -1.10262900 | -3.50930600 |
| C  | -3.23322500 | -0.48811700 | 2.40908000  |
| H  | -2.15574000 | -0.33980500 | 2.48717300  |
| H  | -3.70253900 | 0.47828700  | 2.62544100  |
| H  | -3.54743000 | -1.18064300 | 3.19290900  |
| C  | 2.92564700  | -0.43124400 | -2.61794000 |
| H  | 1.85745000  | -0.22142500 | -2.55199400 |
| H  | 3.41889900  | 0.52437600  | -2.83017700 |
| H  | 3.10268400  | -1.08313900 | -3.47608000 |
| C  | 3.15939800  | -0.65712300 | 2.46154000  |
| H  | 3.65481400  | 0.28786200  | 2.71162300  |
| H  | 2.08626200  | -0.47073600 | 2.51852900  |
| H  | 3.43065500  | -1.37720100 | 3.23657700  |
| C  | 0.02836100  | -1.82000300 | -0.76003300 |
| H  | -0.92793900 | -2.07047200 | -1.20474400 |
| H  | 0.87958500  | -1.87960700 | -1.42565500 |
| C  | 0.21107100  | -2.04196100 | 0.61985800  |
| H  | 0.04393000  | -0.60839900 | 1.47163700  |
| H  | 1.23968800  | -2.16565200 | 0.94058000  |
| C  | -0.75456300 | -2.86417400 | 1.44709100  |
| H  | -1.78889900 | -2.73050700 | 1.13700900  |
| H  | -0.50618500 | -3.92301200 | 1.30829100  |
| H  | -0.67999600 | -2.64559600 | 2.51541100  |
| Co | 0.02711400  | 0.05491400  | 0.11635000  |

**<sup>0</sup>Co(0)-9**

| Atom | x           | y          | z           |
|------|-------------|------------|-------------|
| C    | 1.28344900  | 2.58177800 | -0.13753300 |
| C    | 1.31540900  | 3.97098300 | -0.10553800 |
| C    | 0.12310600  | 4.70061200 | -0.09213800 |
| C    | -1.09905100 | 4.02253000 | -0.09741600 |
| C    | -1.12615300 | 2.63306600 | -0.13000300 |
| N    | 0.06376800  | 1.91609400 | -0.17903200 |
| H    | 0.14632200  | 5.78377800 | -0.06448000 |
| H    | 2.26671100  | 4.49037300 | -0.08140600 |
| H    | -2.02731500 | 4.58172400 | -0.06695200 |
| C    | 2.36910700  | 1.66289900 | -0.12378000 |

|   |             |             |             |
|---|-------------|-------------|-------------|
| C | -2.24870500 | 1.76025500  | -0.11296600 |
| N | -1.90968700 | 0.46996100  | -0.06041800 |
| N | 1.97749000  | 0.38795400  | -0.06917300 |
| C | -3.66998900 | 2.24728200  | -0.16057600 |
| H | -4.14493600 | 2.22039600  | 0.82578600  |
| H | -3.72202600 | 3.27382100  | -0.52342500 |
| H | -4.27925200 | 1.62713800  | -0.82164400 |
| C | 3.80903400  | 2.09157200  | -0.17273300 |
| H | 3.90449600  | 3.10599500  | -0.56041300 |
| H | 4.27557000  | 2.07110700  | 0.81792000  |
| H | 4.39707300  | 1.43110000  | -0.81320200 |
| C | -2.94733500 | -0.51420400 | -0.06975500 |
| C | -3.25063700 | -1.16312000 | -1.28632400 |
| C | -3.63739600 | -0.84170600 | 1.11282300  |
| C | -4.23313900 | -2.15346300 | -1.29140500 |
| C | -4.61000000 | -1.84675800 | 1.06160500  |
| C | -4.90756400 | -2.50273300 | -0.12482700 |
| H | -4.47205900 | -2.65607600 | -2.22411800 |
| H | -5.13867300 | -2.11221900 | 1.97306100  |
| H | -5.66366500 | -3.28125400 | -0.14405100 |
| C | 2.97265500  | -0.64007100 | -0.06671800 |
| C | 3.64331100  | -0.98840200 | 1.12070900  |
| C | 3.24612100  | -1.31723800 | -1.27525000 |
| C | 4.56387900  | -2.04217800 | 1.08322300  |
| C | 4.17823500  | -2.35490700 | -1.26723200 |
| C | 4.83092000  | -2.72548300 | -0.09464200 |
| H | 5.07718100  | -2.32302800 | 1.99891200  |
| H | 4.39474700  | -2.87792600 | -2.19421800 |
| H | 5.54725100  | -3.54095700 | -0.10320400 |
| C | 3.42762500  | -0.25039300 | 2.42163800  |
| H | 4.27092200  | 0.41568100  | 2.63681300  |
| H | 2.52301000  | 0.35437100  | 2.40895000  |
| H | 3.35713000  | -0.94944500 | 3.25915200  |
| C | 2.56464300  | -0.91824700 | -2.56111300 |
| H | 1.47947900  | -1.02965600 | -2.49735700 |
| H | 2.74869100  | 0.13099200  | -2.80962400 |
| H | 2.92060600  | -1.52831400 | -3.39376600 |
| C | -3.38389100 | -0.13122900 | 2.42207100  |
| H | -2.43765500 | 0.40668300  | 2.42334800  |
| H | -4.17877100 | 0.59274200  | 2.63459400  |
| H | -3.37315600 | -0.84045700 | 3.25383500  |
| C | -2.55434900 | -0.77725800 | -2.56850700 |
| H | -2.74017100 | 0.26894300  | -2.83009300 |

|    |             |             |             |
|----|-------------|-------------|-------------|
| H  | -1.46964500 | -0.88205500 | -2.49202400 |
| H  | -2.89985400 | -1.39629900 | -3.39889500 |
| C  | 0.00965700  | -1.16240500 | 1.50226800  |
| H  | 0.85515800  | -1.15260600 | 2.18431100  |
| H  | -0.92836900 | -1.22734700 | 2.04881500  |
| C  | 0.12742900  | -2.16236300 | 0.36964400  |
| H  | 1.15585500  | -2.50941800 | 0.26768300  |
| H  | -0.05828000 | -1.64703800 | -0.63312900 |
| C  | -0.83054600 | -3.35927900 | 0.40728400  |
| H  | -0.60504100 | -3.97591400 | 1.28233600  |
| H  | -1.87213700 | -3.04680000 | 0.47964100  |
| H  | -0.72594200 | -3.98744300 | -0.48304000 |
| Co | 0.02595600  | 0.14348600  | 0.04531000  |

**<sup>0</sup>Co(0)-10**

| Atom | x           | y           | z           |
|------|-------------|-------------|-------------|
| C    | -1.19939700 | 2.42431300  | -0.16148500 |
| C    | -1.21006000 | 3.81360500  | -0.11279200 |
| C    | 0.00001200  | 4.51591100  | -0.11293600 |
| C    | 1.21007800  | 3.81360100  | -0.11281700 |
| C    | 1.19940900  | 2.42430700  | -0.16151400 |
| N    | 0.00000100  | 1.74620600  | -0.25784600 |
| H    | 0.00001400  | 5.59905000  | -0.07555800 |
| H    | -2.15211100 | 4.34862700  | -0.05928600 |
| H    | 2.15213500  | 4.34861500  | -0.05933000 |
| C    | -2.29981400 | 1.50062500  | -0.08341000 |
| C    | 2.29981700  | 1.50061400  | -0.08347300 |
| N    | 1.91054200  | 0.23798200  | -0.00214700 |
| N    | -1.91055900 | 0.23799200  | -0.00208400 |
| C    | 3.72988600  | 1.96109800  | -0.09089700 |
| H    | 3.92303800  | 2.62320700  | -0.93968100 |
| H    | 3.96572200  | 2.52578700  | 0.81748900  |
| H    | 4.42018700  | 1.12108000  | -0.15040700 |
| C    | -3.72988100 | 1.96112300  | -0.09081700 |
| H    | -3.92303200 | 2.62328000  | -0.93956100 |
| H    | -4.42018300 | 1.12111300  | -0.15039100 |
| H    | -3.96573100 | 2.52574600  | 0.81760500  |
| C    | 2.85088200  | -0.84014600 | 0.02356100  |
| C    | 3.39828200  | -1.26706200 | 1.24735000  |
| C    | 3.15889300  | -1.49321800 | -1.18418100 |
| C    | 4.27065900  | -2.35815300 | 1.23593500  |
| C    | 4.03549900  | -2.57987100 | -1.14747400 |
| C    | 4.59021300  | -3.01300700 | 0.05174800  |
| H    | 4.69839800  | -2.69924700 | 2.17420600  |

|    |             |             |             |
|----|-------------|-------------|-------------|
| H  | 4.28087100  | -3.09179200 | -2.07346900 |
| H  | 5.26674000  | -3.86173500 | 0.06398700  |
| C  | -2.85090400 | -0.84013200 | 0.02361100  |
| C  | -3.15896800 | -1.49312200 | -1.18416100 |
| C  | -3.39823100 | -1.26713700 | 1.24739900  |
| C  | -4.03555100 | -2.57979200 | -1.14748700 |
| C  | -4.27059700 | -2.35823900 | 1.23595000  |
| C  | -4.59020000 | -3.01301700 | 0.05173600  |
| H  | -4.28095800 | -3.09165800 | -2.07350300 |
| H  | -4.69828300 | -2.69940400 | 2.17421900  |
| H  | -5.26670900 | -3.86175900 | 0.06395200  |
| C  | -2.56192400 | -1.03190400 | -2.49127000 |
| H  | -2.87857500 | -0.01652700 | -2.74943400 |
| H  | -1.46930400 | -1.01294300 | -2.45091700 |
| H  | -2.86048200 | -1.69094800 | -3.30877300 |
| C  | -3.04763000 | -0.57425900 | 2.53865900  |
| H  | -1.96375800 | -0.50380600 | 2.65748600  |
| H  | -3.44042900 | 0.44752000  | 2.57475800  |
| H  | -3.45923900 | -1.11426600 | 3.39365100  |
| C  | 2.56175200  | -1.03214800 | -2.49129900 |
| H  | 1.46912800  | -1.01338700 | -2.45091200 |
| H  | 2.87823300  | -0.01673700 | -2.74951800 |
| H  | 2.86038600  | -1.69119000 | -3.30877900 |
| C  | 3.04775400  | -0.57409300 | 2.53858200  |
| H  | 3.44063900  | 0.44765600  | 2.57461400  |
| H  | 1.96389100  | -0.50354900 | 2.65742800  |
| H  | 3.45933800  | -1.11408400 | 3.39359600  |
| H  | 0.00002300  | -0.81000700 | 1.41817600  |
| Co | 0.00001100  | -0.00345500 | 0.12451000  |

<sup>1</sup>Co(0)<sup>1</sup>Co(0)-1

| Atom | x           | y          | z          |
|------|-------------|------------|------------|
| C    | -1.18657500 | 2.36864300 | 0.13461400 |
| C    | -1.20456800 | 3.75292600 | 0.26948600 |
| C    | -0.00000200 | 4.45991500 | 0.31884900 |
| C    | 1.20456400  | 3.75293600 | 0.26952200 |
| C    | 1.18658900  | 2.36864600 | 0.13467500 |
| N    | 0.00001100  | 1.69254600 | 0.00696200 |
| H    | -0.00000500 | 5.53855500 | 0.42484800 |
| H    | -2.14655400 | 4.28252800 | 0.34971400 |
| H    | 2.14654500  | 4.28254800 | 0.34975200 |
| C    | -2.37122400 | 1.51410400 | 0.14346700 |
| C    | 2.37123000  | 1.51410500 | 0.14356500 |

|   |             |             |             |
|---|-------------|-------------|-------------|
| N | 2.14346100  | 0.23042300  | 0.10936100  |
| N | -2.14345300 | 0.23042500  | 0.10938700  |
| C | 3.74332700  | 2.13870400  | 0.21001200  |
| H | 3.93258100  | 2.77734400  | -0.65798700 |
| H | 3.84243800  | 2.76721100  | 1.09970000  |
| H | 4.52062200  | 1.37791900  | 0.24896800  |
| C | -3.74332000 | 2.13871800  | 0.20981000  |
| H | -3.84256800 | 2.76695000  | 1.09968600  |
| H | -3.93239400 | 2.77762800  | -0.65801900 |
| H | -4.52064200 | 1.37794500  | 0.24842000  |
| C | 3.19230300  | -0.72851100 | 0.10985800  |
| C | 3.44905000  | -1.43118500 | 1.30341300  |
| C | 3.88644400  | -1.03636900 | -1.07669600 |
| C | 4.43018000  | -2.42370900 | 1.29881900  |
| C | 4.85512500  | -2.04256700 | -1.03607300 |
| C | 5.13370900  | -2.73119000 | 0.13906500  |
| H | 4.63806700  | -2.96460900 | 2.21762900  |
| H | 5.39253700  | -2.29039400 | -1.94690700 |
| H | 5.88876100  | -3.51071100 | 0.14889900  |
| C | -3.19230400 | -0.72850200 | 0.10985700  |
| C | -3.88636800 | -1.03641300 | -1.07674200 |
| C | -3.44916000 | -1.43108500 | 1.30342900  |
| C | -4.85508200 | -2.04257200 | -1.03612200 |
| C | -4.43033000 | -2.42358000 | 1.29882700  |
| C | -5.13377700 | -2.73111200 | 0.13904600  |
| H | -5.39243600 | -2.29044800 | -1.94697600 |
| H | -4.63830600 | -2.96439900 | 2.21766400  |
| H | -5.88885500 | -3.51060800 | 0.14886500  |
| C | -3.58450600 | -0.31638600 | -2.36738900 |
| H | -3.91186600 | 0.72855700  | -2.34366500 |
| H | -2.51293100 | -0.31399100 | -2.57807900 |
| H | -4.09354700 | -0.79639300 | -3.20538200 |
| C | -2.67702900 | -1.11539400 | 2.56000500  |
| H | -1.59998000 | -1.24426300 | 2.41086600  |
| H | -2.82246500 | -0.08066300 | 2.88517200  |
| H | -2.98158000 | -1.76837800 | 3.38023600  |
| C | 3.58473200  | -0.31622100 | -2.36731300 |
| H | 2.51316800  | -0.31367300 | -2.57805100 |
| H | 3.91221900  | 0.72867900  | -2.34350600 |
| H | 4.09375300  | -0.79623100 | -3.20531700 |
| C | 2.67685000  | -1.11552400 | 2.55995400  |
| H | 2.82255700  | -0.08089200 | 2.88533400  |
| H | 1.59978200  | -1.24403400 | 2.41066800  |

|    |             |             |             |
|----|-------------|-------------|-------------|
| H  | 2.98112300  | -1.76874300 | 3.38010000  |
| Co | 0.00003600  | -0.21477200 | -0.38311300 |
| C  | -0.00002800 | -1.56696000 | -1.87893800 |
| H  | -0.88485700 | -2.21467400 | -1.86271000 |
| H  | -0.00006900 | -1.06149800 | -2.85511600 |
| H  | 0.88479300  | -2.21468400 | -1.86275000 |

**<sup>1</sup>Co(0)-2**

| Atom | x           | y           | z           |
|------|-------------|-------------|-------------|
| C    | 1.18519200  | 2.34289400  | -0.03836600 |
| C    | 1.18085300  | 3.74798300  | -0.05708000 |
| C    | -0.01153500 | 4.43916900  | -0.00396200 |
| C    | -1.20983200 | 3.70667900  | 0.03881000  |
| C    | -1.17695800 | 2.32051400  | 0.04131600  |
| N    | 0.00211200  | 1.62806800  | 0.01913200  |
| H    | -0.02782100 | 5.52318000  | -0.00562800 |
| H    | 2.11918500  | 4.28662200  | -0.10789100 |
| H    | -2.15558800 | 4.23123800  | 0.05832100  |
| C    | 2.40087600  | 1.57077500  | -0.07369000 |
| C    | -2.43444700 | 1.53366700  | 0.00388200  |
| N    | -2.34735800 | 0.25638900  | 0.10906200  |
| N    | 2.26518700  | 0.25969100  | 0.03914600  |
| C    | -3.73988700 | 2.27828400  | -0.19136100 |
| H    | -3.92730100 | 2.96493400  | 0.63911400  |
| H    | -3.72582000 | 2.87439500  | -1.10728300 |
| H    | -4.57586900 | 1.58395400  | -0.24591000 |
| C    | 3.73424800  | 2.26193800  | -0.23323500 |
| H    | 3.77077100  | 2.86500200  | -1.14557200 |
| H    | 3.93905400  | 2.93482700  | 0.60575500  |
| H    | 4.54669900  | 1.53908100  | -0.27825900 |
| C    | -3.47761100 | -0.58949500 | -0.04457100 |
| C    | -3.85762100 | -0.99673900 | -1.34179400 |
| C    | -4.16005200 | -1.07550400 | 1.08915600  |
| C    | -4.89769000 | -1.91853300 | -1.47539900 |
| C    | -5.20166900 | -1.98814400 | 0.90395400  |
| C    | -5.56736100 | -2.42011600 | -0.36519700 |
| H    | -5.18597600 | -2.24144400 | -2.47165900 |
| H    | -5.73320400 | -2.36058900 | 1.77516600  |
| H    | -6.37330700 | -3.13632100 | -0.48868600 |
| C    | 3.39712100  | -0.60849400 | -0.04512600 |
| C    | 4.03709800  | -1.06052500 | 1.12495300  |
| C    | 3.83267600  | -1.04884900 | -1.31432100 |
| C    | 5.08816200  | -1.97552200 | 1.00724100  |
| C    | 4.88071900  | -1.96793200 | -1.38358400 |

|    |             |             |             |
|----|-------------|-------------|-------------|
| C  | 5.50549100  | -2.43831900 | -0.23346200 |
| H  | 5.58560700  | -2.32286000 | 1.90870500  |
| H  | 5.21143200  | -2.31508700 | -2.35821700 |
| H  | 6.31929700  | -3.15284700 | -0.30578500 |
| C  | 3.62751500  | -0.58418600 | 2.49826100  |
| H  | 3.22618600  | 0.42978000  | 2.48261300  |
| H  | 2.86099800  | -1.23270800 | 2.93557400  |
| H  | 4.48036100  | -0.59765400 | 3.18097500  |
| C  | 3.20161800  | -0.52215400 | -2.57841400 |
| H  | 2.11384300  | -0.58145900 | -2.53736700 |
| H  | 3.45993400  | 0.52898500  | -2.74943100 |
| H  | 3.54391600  | -1.08728000 | -3.44756700 |
| C  | -3.80189700 | -0.62240300 | 2.48411900  |
| H  | -2.88326400 | -1.09505800 | 2.84328600  |
| H  | -3.64867400 | 0.45819000  | 2.54315200  |
| H  | -4.59516700 | -0.88245900 | 3.18799100  |
| C  | -3.18009900 | -0.43113800 | -2.56512500 |
| H  | -3.48994100 | 0.60350400  | -2.75402100 |
| H  | -2.09514100 | -0.42942300 | -2.46048400 |
| H  | -3.43668000 | -1.01189400 | -3.45329400 |
| C  | -0.04179500 | -1.80753100 | -1.42003000 |
| H  | 0.02316000  | -1.44048900 | -2.45158200 |
| H  | 0.72702700  | -2.58608800 | -1.31686100 |
| H  | -1.01515900 | -2.29774800 | -1.30966000 |
| C  | -0.17780600 | -1.81453700 | 1.75996800  |
| H  | 0.67235500  | -2.48415600 | 1.67597200  |
| H  | -1.13014500 | -2.20826400 | 1.42602000  |
| C  | -0.07501200 | -0.61863500 | 2.37665400  |
| H  | -0.93602800 | 0.01740400  | 2.52963900  |
| H  | 0.86299900  | -0.26723100 | 2.78561200  |
| Co | 0.28410700  | -0.38511000 | -0.01984000 |

**<sup>1</sup>Co(0)-TS-2/3**

| Atom | x           | y          | z           |
|------|-------------|------------|-------------|
| C    | 1.18988900  | 2.39933000 | -0.20220800 |
| C    | 1.20525700  | 3.78742900 | -0.29688400 |
| C    | 0.00455000  | 4.50068000 | -0.31720100 |
| C    | -1.19848600 | 3.79228700 | -0.28042800 |
| C    | -1.18694000 | 2.40410000 | -0.18659300 |
| N    | 0.00061400  | 1.71178000 | -0.11169800 |
| H    | 0.00632000  | 5.58268600 | -0.38035300 |
| H    | 2.14893300  | 4.31627800 | -0.36491300 |
| H    | -2.14105900 | 4.32468200 | -0.33504100 |
| C    | 2.37695700  | 1.55927300 | -0.24442500 |

|   |             |             |             |
|---|-------------|-------------|-------------|
| C | -2.37585000 | 1.56749200  | -0.21282800 |
| N | -2.18139000 | 0.28740800  | -0.02897600 |
| N | 2.18284100  | 0.28035400  | -0.05638400 |
| C | -3.72539600 | 2.19178800  | -0.48030800 |
| H | -3.98741500 | 2.91382300  | 0.29936000  |
| H | -3.73407600 | 2.73089500  | -1.43200300 |
| H | -4.50903900 | 1.43669100  | -0.51300600 |
| C | 3.72307200  | 2.17998200  | -0.53670400 |
| H | 3.71483000  | 2.71879100  | -1.48853200 |
| H | 4.00220100  | 2.90137000  | 0.23756500  |
| H | 4.50354400  | 1.42230200  | -0.58460100 |
| C | -3.23820500 | -0.65304400 | -0.15271400 |
| C | -3.43632000 | -1.29074900 | -1.39556100 |
| C | -4.01945100 | -1.00782100 | 0.96603700  |
| C | -4.41238500 | -2.28428600 | -1.49532200 |
| C | -4.98748200 | -2.00454400 | 0.81938300  |
| C | -5.18604700 | -2.64609900 | -0.39808500 |
| H | -4.56651600 | -2.77694200 | -2.45124900 |
| H | -5.59362400 | -2.27836600 | 1.67839900  |
| H | -5.93984500 | -3.42133500 | -0.49131900 |
| C | 3.23418600  | -0.66588400 | -0.17527900 |
| C | 4.04703500  | -0.97999800 | 0.93359800  |
| C | 3.39718400  | -1.34931600 | -1.39892200 |
| C | 5.00166200  | -1.99145400 | 0.80051100  |
| C | 4.36392900  | -2.35289300 | -1.48637300 |
| C | 5.16172100  | -2.68150200 | -0.39584200 |
| H | 5.62932900  | -2.23675300 | 1.65267300  |
| H | 4.49148300  | -2.88053500 | -2.42744700 |
| H | 5.90576000  | -3.46725800 | -0.47883900 |
| C | 3.91211800  | -0.23089100 | 2.23636100  |
| H | 4.16043900  | 0.82969300  | 2.12587200  |
| H | 2.89388300  | -0.27137800 | 2.62806700  |
| H | 4.58077800  | -0.64564700 | 2.99337700  |
| C | 2.56442800  | -0.98414800 | -2.60295800 |
| H | 1.49434300  | -1.00663400 | -2.38159200 |
| H | 2.78287700  | 0.02949600  | -2.95509100 |
| H | 2.75440700  | -1.66941900 | -3.43148400 |
| C | -3.82530200 | -0.33004400 | 2.29977700  |
| H | -2.83537200 | -0.53369100 | 2.71510300  |
| H | -3.91414700 | 0.75765400  | 2.22731500  |
| H | -4.56761300 | -0.67578200 | 3.02204200  |
| C | -2.62180500 | -0.89490500 | -2.60208700 |
| H | -2.83837200 | 0.13014500  | -2.92076100 |



|    |             |             |             |
|----|-------------|-------------|-------------|
| H  | -1.54904800 | -0.93230400 | -2.39621200 |
| H  | -2.83014500 | -1.55399500 | -3.44727800 |
| C  | -0.11927300 | -2.19313400 | 0.40293000  |
| H  | 0.15327700  | -1.91482900 | -0.63371800 |
| H  | 0.54687500  | -3.01357100 | 0.66037100  |
| H  | -1.15096700 | -2.53843500 | 0.41173800  |
| C  | 0.13138600  | -1.34796300 | 2.18412400  |
| H  | 1.10411500  | -1.78714700 | 2.37938400  |
| H  | -0.67338800 | -1.96842800 | 2.56978900  |
| C  | 0.02236400  | 0.07527200  | 2.37336800  |
| H  | -0.90815700 | 0.48457700  | 2.75424400  |
| H  | 0.90411400  | 0.62489700  | 2.68898600  |
| Co | -0.00259100 | -0.11118800 | 0.38949500  |

**<sup>1</sup>Co(0)-3**

| Atom | x           | y           | z           |
|------|-------------|-------------|-------------|
| C    | 1.18583200  | 2.67571500  | 0.10616600  |
| C    | 1.20677500  | 4.06507000  | 0.03196000  |
| C    | 0.00009800  | 4.77249000  | 0.03276400  |
| C    | -1.20661600 | 4.06512200  | 0.03195700  |
| C    | -1.18572700 | 2.67577300  | 0.10617000  |
| N    | 0.00002700  | 2.00769300  | 0.25831300  |
| H    | 0.00011800  | 5.85468700  | -0.02788900 |
| H    | 2.14657300  | 4.59810200  | -0.05356500 |
| H    | -2.14638800 | 4.59819900  | -0.05356500 |
| C    | 2.33869100  | 1.79857900  | -0.03424000 |
| C    | -2.33863600 | 1.79868500  | -0.03424700 |
| N    | -2.05967300 | 0.52199100  | -0.15754700 |
| N    | 2.05967500  | 0.52188100  | -0.15758000 |
| C    | -3.73055200 | 2.37676500  | -0.05949200 |
| H    | -3.99218600 | 2.82686700  | 0.90323900  |
| H    | -3.80972000 | 3.16383000  | -0.81412600 |
| H    | -4.47265300 | 1.61497600  | -0.29141600 |
| C    | 3.73064800  | 2.37654900  | -0.05941500 |
| H    | 3.80990700  | 3.16361100  | -0.81404500 |
| H    | 3.99229200  | 2.82661600  | 0.90332500  |
| H    | 4.47268900  | 1.61470000  | -0.29133600 |
| C    | -3.07620400 | -0.46536400 | -0.29120600 |
| C    | -3.21970600 | -1.09301600 | -1.54538200 |
| C    | -3.84885400 | -0.87263800 | 0.81430800  |
| C    | -4.16372200 | -2.11081300 | -1.68210500 |
| C    | -4.77505500 | -1.90403300 | 0.63291200  |
| C    | -4.94028100 | -2.51858300 | -0.60207400 |
| H    | -4.28437700 | -2.59294100 | -2.64792300 |

|    |             |             |             |
|----|-------------|-------------|-------------|
| H  | -5.36918100 | -2.23072500 | 1.48160900  |
| H  | -5.66318700 | -3.31932700 | -0.72086900 |
| C  | 3.07621000  | -0.46549600 | -0.29117000 |
| C  | 3.84876300  | -0.87277300 | 0.81441300  |
| C  | 3.21984800  | -1.09310100 | -1.54534300 |
| C  | 4.77497400  | -1.90417000 | 0.63309100  |
| C  | 4.16387300  | -2.11091000 | -1.68199300 |
| C  | 4.94030600  | -2.51871300 | -0.60188900 |
| H  | 5.36900600  | -2.23089500 | 1.48184100  |
| H  | 4.28462400  | -2.59301500 | -2.64781000 |
| H  | 5.66321100  | -3.31946800 | -0.72062100 |
| C  | 3.69351600  | -0.23103100 | 2.17159700  |
| H  | 4.24269300  | 0.71447700  | 2.24066500  |
| H  | 2.64878200  | -0.01641300 | 2.40142300  |
| H  | 4.08234800  | -0.88584500 | 2.95384600  |
| C  | 2.37357200  | -0.66452000 | -2.71722000 |
| H  | 1.30655000  | -0.74220500 | -2.48831900 |
| H  | 2.55477500  | 0.37878400  | -2.99361100 |
| H  | 2.57777100  | -1.28294500 | -3.59348300 |
| C  | -3.69364100 | -0.23092400 | 2.17150900  |
| H  | -2.64886800 | -0.01661600 | 2.40146900  |
| H  | -4.24253300 | 0.71474800  | 2.24053400  |
| H  | -4.08276300 | -0.88562700 | 2.95370300  |
| C  | -2.37327200 | -0.66448400 | -2.71716200 |
| H  | -2.55424100 | 0.37887400  | -2.99347000 |
| H  | -1.30628000 | -0.74241400 | -2.48817900 |
| H  | -2.57751000 | -1.28280800 | -3.59348800 |
| C  | -0.00008100 | -1.59217100 | 1.58988000  |
| H  | 0.87493800  | -1.59032100 | 2.25564500  |
| H  | -0.87489800 | -1.59010100 | 2.25590000  |
| C  | -0.00039300 | -2.89071600 | 0.76399600  |
| H  | 0.87524500  | -2.91651000 | 0.10201300  |
| H  | -0.87623800 | -2.91625300 | 0.10227700  |
| C  | -0.00041100 | -4.17018800 | 1.61519300  |
| H  | 0.88218500  | -4.20890700 | 2.26221300  |
| H  | -0.88284900 | -4.20870900 | 2.26244000  |
| H  | -0.00058800 | -5.07527900 | 0.99641500  |
| Co | 0.00003100  | 0.05375100  | 0.42648100  |

**<sup>1</sup>Co(0)-4**

| Atom | x          | y          | z           |
|------|------------|------------|-------------|
| C    | 1.19426900 | 2.41273000 | -0.52134700 |
| C    | 1.23531200 | 3.75138500 | -0.87879700 |
| C    | 0.04223800 | 4.48102800 | -1.02022600 |

|   |             |             |             |
|---|-------------|-------------|-------------|
| C | -1.15321900 | 3.82786500  | -0.81350700 |
| C | -1.16682200 | 2.46960300  | -0.44873700 |
| N | 0.01292100  | 1.75989400  | -0.29237700 |
| H | 0.06543400  | 5.52973300  | -1.29405800 |
| H | 2.18346200  | 4.24027700  | -1.05604100 |
| H | -2.08907500 | 4.36016000  | -0.92905900 |
| C | 2.45206900  | 1.63141600  | -0.41403200 |
| C | -2.39011400 | 1.74659400  | -0.22958500 |
| N | -2.27302100 | 0.49429100  | 0.18827200  |
| N | 2.38795000  | 0.44965500  | 0.08328900  |
| C | -3.71871300 | 2.42783400  | -0.46047300 |
| H | -3.83353100 | 3.29534300  | 0.19728000  |
| H | -3.82297400 | 2.78836600  | -1.48821800 |
| H | -4.54753400 | 1.75270300  | -0.25739800 |
| C | 3.73298400  | 2.26450100  | -0.92101900 |
| H | 3.63519200  | 2.58095400  | -1.96235200 |
| H | 3.99276200  | 3.15152900  | -0.33606100 |
| H | 4.56365800  | 1.56531400  | -0.85032000 |
| C | -3.41593400 | -0.35722100 | 0.26777500  |
| C | -3.97169000 | -0.89119200 | -0.91591900 |
| C | -3.95069700 | -0.70520000 | 1.52436500  |
| C | -5.02851400 | -1.79893000 | -0.81229900 |
| C | -5.01509600 | -1.60794100 | 1.57946800  |
| C | -5.54850800 | -2.16457800 | 0.42326900  |
| H | -5.44803500 | -2.22173600 | -1.72081500 |
| H | -5.43121700 | -1.87229800 | 2.54758300  |
| H | -6.36956000 | -2.87175000 | 0.48434000  |
| C | 3.52141700  | -0.40294700 | 0.14633700  |
| C | 4.28479000  | -0.47526400 | 1.32981500  |
| C | 3.82570200  | -1.22692000 | -0.95741200 |
| C | 5.32523000  | -1.40463900 | 1.39914000  |
| C | 4.87069800  | -2.14555100 | -0.83836100 |
| C | 5.61568600  | -2.24536500 | 0.33088800  |
| H | 5.91712500  | -1.46256300 | 2.30820400  |
| H | 5.10155300  | -2.78849400 | -1.68288100 |
| H | 6.42211900  | -2.96760000 | 0.40659200  |
| C | 4.01556300  | 0.44418700  | 2.49623000  |
| H | 4.00002000  | 1.49600900  | 2.19540900  |
| H | 3.05328900  | 0.23702600  | 2.97104100  |
| H | 4.78715500  | 0.33305400  | 3.26059700  |
| C | 3.06552900  | -1.09845800 | -2.25329700 |
| H | 1.98972400  | -1.04333200 | -2.08651500 |
| H | 3.35287300  | -0.19168500 | -2.79870600 |

|    |             |             |             |
|----|-------------|-------------|-------------|
| H  | 3.26752700  | -1.94735700 | -2.90920700 |
| C  | -3.41354600 | -0.10912100 | 2.80205100  |
| H  | -2.48163500 | -0.59034400 | 3.11244400  |
| H  | -3.20634400 | 0.95826300  | 2.69972100  |
| H  | -4.12806700 | -0.23628500 | 3.61809600  |
| C  | -3.47263200 | -0.48209000 | -2.28052900 |
| H  | -3.92647900 | 0.46132000  | -2.60462800 |
| H  | -2.39174300 | -0.34321100 | -2.29893000 |
| H  | -3.72977900 | -1.23482200 | -3.02843600 |
| C  | 0.00299600  | -2.07678200 | -0.38498500 |
| H  | 1.07227600  | -2.30430500 | -0.27322900 |
| H  | -0.50076900 | -2.69393600 | 0.37879600  |
| C  | -0.48201700 | -2.54668200 | -1.76119600 |
| H  | -0.09558900 | -1.89322300 | -2.55531100 |
| H  | -1.57205400 | -2.45923200 | -1.81497200 |
| C  | -0.09571300 | -3.99612500 | -2.09515800 |
| H  | 0.99178900  | -4.12527400 | -2.08998300 |
| H  | -0.50733700 | -4.69056700 | -1.35513900 |
| H  | -0.46334100 | -4.30408900 | -3.08133200 |
| Co | -0.29214800 | -0.18158000 | 0.28542300  |
| C  | 0.39315400  | -0.84084600 | 2.47383700  |
| H  | 1.34917700  | -1.27050900 | 2.20080900  |
| H  | -0.39487500 | -1.54798500 | 2.70983800  |
| C  | 0.22405100  | 0.48493300  | 2.63177700  |
| H  | -0.71467300 | 0.90468000  | 2.97158000  |
| H  | 1.03169900  | 1.18430200  | 2.46212200  |

**<sup>1</sup>Co(0)-TS-4/5**

| Atom | x           | y          | z           |
|------|-------------|------------|-------------|
| C    | 1.14936700  | 2.52116500 | -0.30167000 |
| C    | 1.13233900  | 3.90704500 | -0.47066900 |
| C    | -0.07430100 | 4.59199400 | -0.54061500 |
| C    | -1.26417500 | 3.85598600 | -0.46315100 |
| C    | -1.22501400 | 2.47898100 | -0.29224900 |
| N    | -0.02985200 | 1.80414400 | -0.18907600 |
| H    | -0.09658100 | 5.66852700 | -0.66414900 |
| H    | 2.06692100  | 4.45002800 | -0.54911600 |
| H    | -2.21602000 | 4.36576500 | -0.54633200 |
| C    | 2.36047800  | 1.73722100 | -0.25466600 |
| C    | -2.43445000 | 1.65648900 | -0.26051600 |
| N    | -2.28529200 | 0.38833100 | -0.02043500 |
| N    | 2.21996700  | 0.45855500 | 0.02014700  |
| C    | -3.77339100 | 2.30833900 | -0.53301300 |
| H    | -4.00123800 | 3.06900300 | 0.21939100  |

|   |             |             |             |
|---|-------------|-------------|-------------|
| H | -3.78446800 | 2.80556200  | -1.50658400 |
| H | -4.57637300 | 1.57358000  | -0.51914300 |
| C | 3.69356400  | 2.39822600  | -0.52416400 |
| H | 3.71384800  | 2.88319400  | -1.50448400 |
| H | 3.90881800  | 3.17137800  | 0.22020200  |
| H | 4.50586700  | 1.67422300  | -0.49076500 |
| C | -3.38002000 | -0.51344600 | -0.08631300 |
| C | -3.66862200 | -1.14880500 | -1.31367800 |
| C | -4.12291700 | -0.82799100 | 1.07098700  |
| C | -4.66459600 | -2.12740800 | -1.34894500 |
| C | -5.11248000 | -1.81054100 | 0.98778100  |
| C | -5.38004900 | -2.46923800 | -0.20713700 |
| H | -4.88246400 | -2.62197400 | -2.29146700 |
| H | -5.68428600 | -2.05580700 | 1.87838300  |
| H | -6.14763900 | -3.23524300 | -0.25013900 |
| C | 3.32681900  | -0.42878300 | -0.04737100 |
| C | 4.02785700  | -0.77931200 | 1.12517100  |
| C | 3.67197700  | -1.01420900 | -1.28481900 |
| C | 5.04700000  | -1.73127100 | 1.04304400  |
| C | 4.69386600  | -1.96617900 | -1.32023900 |
| C | 5.37838000  | -2.33166900 | -0.16652200 |
| H | 5.58914000  | -2.00038400 | 1.94527500  |
| H | 4.95684200  | -2.42105300 | -2.27125600 |
| H | 6.16899500  | -3.07390800 | -0.21081900 |
| C | 3.70584500  | -0.12265500 | 2.44414500  |
| H | 3.78420300  | 0.96692100  | 2.38533900  |
| H | 2.68639900  | -0.34127500 | 2.76886300  |
| H | 4.38791700  | -0.46436200 | 3.22545400  |
| C | 2.97323200  | -0.60432500 | -2.55811100 |
| H | 1.88699600  | -0.60602700 | -2.44789000 |
| H | 3.25077200  | 0.41055700  | -2.86258100 |
| H | 3.23517900  | -1.27392300 | -3.37989500 |
| C | -3.89555300 | -0.09233900 | 2.36821800  |
| H | -2.86437200 | -0.17204400 | 2.71509900  |
| H | -4.10695300 | 0.97740300  | 2.26890500  |
| H | -4.54538300 | -0.48240000 | 3.15420000  |
| C | -2.94793800 | -0.75293500 | -2.57920900 |
| H | -3.28262400 | 0.22570800  | -2.94151300 |
| H | -1.86990200 | -0.67518100 | -2.43055000 |
| H | -3.13451600 | -1.47486100 | -3.37702700 |
| C | 0.36928000  | -2.08607200 | 0.81737400  |
| H | 1.45796300  | -2.13762000 | 0.85705200  |
| H | -0.01825100 | -2.93160800 | 1.38452100  |

|    |             |             |             |
|----|-------------|-------------|-------------|
| C  | -0.14898300 | -2.23352400 | -0.62015500 |
| H  | 0.06256400  | -1.34151100 | -1.23677400 |
| H  | -1.23473700 | -2.34487100 | -0.61154000 |
| C  | 0.48907000  | -3.44059900 | -1.32817900 |
| H  | 1.57556100  | -3.34023400 | -1.38509400 |
| H  | 0.26744000  | -4.36667700 | -0.78936500 |
| H  | 0.10365400  | -3.54833400 | -2.34682700 |
| Co | 0.07692600  | 0.02024500  | 0.48393800  |
| C  | -0.14341700 | -0.99243600 | 2.40412300  |
| H  | 0.63603400  | -1.51248200 | 2.95545500  |
| H  | -1.11511600 | -1.44801700 | 2.56923600  |
| C  | -0.09510400 | 0.44923200  | 2.39939400  |
| H  | -1.01411900 | 0.99931300  | 2.57782700  |
| H  | 0.79078600  | 0.93913400  | 2.79427400  |

**<sup>1</sup>Co(0)-5**

| Atom | x           | y           | z           |
|------|-------------|-------------|-------------|
| C    | 1.18576600  | -3.04409300 | -0.25373900 |
| C    | 1.20659900  | -4.43518600 | -0.27448500 |
| C    | 0.00006400  | -5.14119000 | -0.32194000 |
| C    | -1.20648900 | -4.43521400 | -0.27446000 |
| C    | -1.18568800 | -3.04412300 | -0.25371800 |
| N    | 0.00002900  | -2.36618900 | -0.35668800 |
| H    | 0.00007700  | -6.22499900 | -0.33442200 |
| H    | 2.14664500  | -4.97261800 | -0.22694400 |
| H    | -2.14652100 | -4.97267000 | -0.22690000 |
| C    | 2.34070900  | -2.18024000 | -0.05985600 |
| C    | -2.34065100 | -2.18029600 | -0.05982600 |
| N    | -2.06526200 | -0.91458100 | 0.15079300  |
| N    | 2.06529100  | -0.91453100 | 0.15077000  |
| C    | -3.73098000 | -2.76261200 | -0.07746200 |
| H    | -3.97986200 | -3.17059100 | -1.06190000 |
| H    | -3.81561300 | -3.58297000 | 0.64048700  |
| H    | -4.47832600 | -2.01457800 | 0.18054100  |
| C    | 3.73105200  | -2.76252300 | -0.07749900 |
| H    | 3.81571200  | -3.58287200 | 0.64045800  |
| H    | 3.97993500  | -3.17050700 | -1.06193500 |
| H    | 4.47838200  | -2.01446900 | 0.18049000  |
| C    | -3.08477000 | 0.06058100  | 0.34028700  |
| C    | -3.24115500 | 0.60395400  | 1.63129800  |
| C    | -3.84669700 | 0.53957800  | -0.74407900 |
| C    | -4.18825500 | 1.60958200  | 1.82561200  |
| C    | -4.77694600 | 1.55501800  | -0.50405900 |
| C    | -4.95531000 | 2.08641800  | 0.76737600  |

|    |             |             |             |
|----|-------------|-------------|-------------|
| H  | -4.31873900 | 2.02719400  | 2.81978400  |
| H  | -5.36344500 | 1.93635800  | -1.33503800 |
| H  | -5.68140200 | 2.87612300  | 0.93184500  |
| C  | 3.08477600  | 0.06065400  | 0.34027600  |
| C  | 3.84668000  | 0.53969300  | -0.74408700 |
| C  | 3.24116000  | 0.60400300  | 1.63129700  |
| C  | 4.77690200  | 1.55515500  | -0.50405600 |
| C  | 4.18823400  | 1.60965300  | 1.82562300  |
| C  | 4.95526400  | 2.08653300  | 0.76738900  |
| H  | 5.36338200  | 1.93652900  | -1.33503200 |
| H  | 4.31871700  | 2.02724700  | 2.81980200  |
| H  | 5.68133500  | 2.87625500  | 0.93186700  |
| C  | 3.67100800  | -0.00831100 | -2.13926800 |
| H  | 4.17847300  | -0.97049500 | -2.26854300 |
| H  | 2.61849800  | -0.16279500 | -2.38335800 |
| H  | 4.09020000  | 0.67758300  | -2.87792800 |
| C  | 2.40183400  | 0.10238400  | 2.77887300  |
| H  | 1.33371600  | 0.21645900  | 2.57019400  |
| H  | 2.56684500  | -0.96180000 | 2.97312100  |
| H  | 2.62738200  | 0.64941700  | 3.69637900  |
| C  | -3.67102100 | -0.00844500 | -2.13925200 |
| H  | -2.61851000 | -0.16293000 | -2.38333900 |
| H  | -4.17848400 | -0.97063200 | -2.26851700 |
| H  | -4.09021300 | 0.67743700  | -2.87792300 |
| C  | -2.40180700 | 0.10237900  | 2.77887600  |
| H  | -2.56682200 | -0.96179700 | 2.97317200  |
| H  | -1.33369300 | 0.21643500  | 2.57016700  |
| H  | -2.62733000 | 0.64945000  | 3.69636400  |
| C  | -0.00003800 | 1.34364800  | -1.38580000 |
| H  | 0.87525100  | 1.40674200  | -2.04771000 |
| H  | -0.87538100 | 1.40670400  | -2.04764400 |
| C  | -0.00003100 | 2.55119400  | -0.43171300 |
| H  | 0.87634900  | 2.50939100  | 0.23001400  |
| H  | -0.87636900 | 2.50935600  | 0.23006700  |
| C  | -0.00007800 | 3.91734600  | -1.13962200 |
| H  | 0.87640800  | 3.97667500  | -1.79884100 |
| H  | -0.87661100 | 3.97664600  | -1.79878300 |
| Co | 0.00001500  | -0.40405100 | -0.38344600 |
| C  | -0.00006700 | 5.11529800  | -0.18366100 |
| H  | -0.87572900 | 5.05212700  | 0.47494000  |
| H  | 0.87564400  | 5.05215800  | 0.47487700  |
| C  | -0.00011800 | 6.46832100  | -0.90011700 |
| H  | -0.00010800 | 7.30227600  | -0.19134200 |

|                            |             |             |             |
|----------------------------|-------------|-------------|-------------|
| H                          | 0.88173800  | 6.57986000  | -1.53944400 |
| H                          | -0.88202400 | 6.57982700  | -1.53938000 |
| <b><sup>1</sup>Co(0)-6</b> |             |             |             |
| Atom                       | x           | y           | z           |
| C                          | 1.09882700  | 2.53896500  | 0.38145700  |
| C                          | 1.06808700  | 3.91790900  | 0.65294000  |
| C                          | -0.13615300 | 4.58482400  | 0.72464000  |
| C                          | -1.31915000 | 3.84744100  | 0.55289300  |
| C                          | -1.26162400 | 2.48447700  | 0.30306600  |
| N                          | -0.06939500 | 1.81996700  | 0.19685300  |
| H                          | -0.17341400 | 5.65062900  | 0.91956800  |
| H                          | 1.99642200  | 4.45619200  | 0.79787500  |
| H                          | -2.27427800 | 4.34873800  | 0.62898100  |
| C                          | 2.33334700  | 1.80555600  | 0.27202000  |
| C                          | -2.51158000 | 1.68919400  | 0.20850300  |
| N                          | -2.41814700 | 0.45314300  | -0.12618400 |
| N                          | 2.23574100  | 0.53615300  | -0.08957600 |
| C                          | -3.82198400 | 2.37373800  | 0.54470200  |
| H                          | -3.80889600 | 2.79146300  | 1.55450100  |
| H                          | -4.02107000 | 3.19905700  | -0.14477900 |
| H                          | -4.65112000 | 1.67277300  | 0.47431900  |
| C                          | 3.64788500  | 2.49454500  | 0.55451400  |
| H                          | 3.82172900  | 3.32001700  | -0.14327500 |
| H                          | 3.67796000  | 2.91563400  | 1.56401400  |
| H                          | 4.48227000  | 1.80307900  | 0.45639000  |
| C                          | -3.53770800 | -0.41910300 | -0.10582000 |
| C                          | -4.21867500 | -0.72534700 | -1.30198200 |
| C                          | -3.90568700 | -1.03732900 | 1.10883500  |
| C                          | -5.24326600 | -1.67391800 | -1.26600100 |
| C                          | -4.92840500 | -1.98816100 | 1.09216000  |
| C                          | -5.59422100 | -2.31453200 | -0.08336600 |
| H                          | -5.77308900 | -1.90860200 | -2.18491600 |
| H                          | -5.20592200 | -2.47446800 | 2.02300100  |
| H                          | -6.38579000 | -3.05686400 | -0.07680500 |
| C                          | 3.39740800  | -0.29414600 | -0.14628500 |
| C                          | 3.87430400  | -0.89444500 | 1.03921100  |
| C                          | 4.02966100  | -0.54723000 | -1.37871600 |
| C                          | 4.96549600  | -1.76182500 | 0.96175700  |
| C                          | 5.12284100  | -1.41818800 | -1.40828500 |
| C                          | 5.58844200  | -2.03058600 | -0.25197300 |
| H                          | 5.32915600  | -2.23158000 | 1.87109400  |
| H                          | 5.61519000  | -1.61121000 | -2.35735100 |
| H                          | 6.43554900  | -2.70776600 | -0.29423900 |



|    |             |             |             |
|----|-------------|-------------|-------------|
| C  | 3.23320000  | -0.60146000 | 2.37268500  |
| H  | 3.46294800  | 0.41250500  | 2.71863700  |
| H  | 2.14630800  | -0.68139900 | 2.32165800  |
| H  | 3.59294800  | -1.29423000 | 3.13589900  |
| C  | 3.56650000  | 0.10178000  | -2.66076000 |
| H  | 2.74068100  | -0.45322400 | -3.11751000 |
| H  | 3.22117600  | 1.12520100  | -2.50501700 |
| H  | 4.37598300  | 0.12775900  | -3.39364900 |
| C  | -3.23735400 | -0.66565700 | 2.40958200  |
| H  | -2.15522100 | -0.58957300 | 2.30414000  |
| H  | -3.59596800 | 0.30070300  | 2.78356200  |
| H  | -3.45133700 | -1.40866500 | 3.18029400  |
| C  | -3.87880900 | -0.03481500 | -2.60042600 |
| H  | -3.83228100 | 1.05234700  | -2.49007000 |
| H  | -2.91106500 | -0.35550700 | -2.99505600 |
| H  | -4.62931200 | -0.25629600 | -3.36183600 |
| C  | -0.08535800 | -1.81799100 | 0.95029100  |
| H  | 0.05168200  | -1.55439100 | 2.01106800  |
| H  | -1.14834900 | -2.06972300 | 0.84178100  |
| C  | 0.75143700  | -3.06681900 | 0.63596300  |
| H  | 1.82240500  | -2.84103900 | 0.69768900  |
| H  | 0.57995700  | -3.38163600 | -0.40229500 |
| C  | 0.45050000  | -4.26310400 | 1.55289500  |
| H  | 0.65216000  | -4.01490100 | 2.60044200  |
| H  | -0.60270300 | -4.55505600 | 1.48540900  |
| H  | 1.05742700  | -5.13949900 | 1.29639300  |
| Co | 0.27022500  | -0.16027600 | -0.17141000 |
| C  | -0.19550400 | -1.12908100 | -2.20979700 |
| H  | 0.67145000  | -1.77599400 | -2.30028700 |
| H  | -1.13319800 | -1.61799700 | -1.97401900 |
| C  | -0.13376500 | 0.18082200  | -2.53400500 |
| H  | -1.01423300 | 0.80854400  | -2.52954500 |
| H  | 0.78820800  | 0.64449500  | -2.85982900 |

**<sup>1</sup>Co(0)-TS-6/7**

| Atom | x           | y          | z           |
|------|-------------|------------|-------------|
| C    | 1.26571800  | 2.67836600 | -0.10140100 |
| C    | 1.32593600  | 4.06618500 | -0.12518800 |
| C    | 0.12770200  | 4.79658000 | -0.14517800 |
| C    | -1.09691000 | 4.12963800 | -0.12191200 |
| C    | -1.12092000 | 2.73244100 | -0.10020500 |
| N    | 0.06156600  | 2.04306900 | -0.12106600 |
| H    | 0.15390400  | 5.88025700 | -0.16075800 |
| H    | 2.27901600  | 4.58226000 | -0.12731600 |

|   |             |             |             |
|---|-------------|-------------|-------------|
| H | -2.01802800 | 4.70036900  | -0.11571700 |
| C | 2.37198300  | 1.74624500  | 0.00680500  |
| C | -2.25406600 | 1.85112400  | -0.00338600 |
| N | -1.94922700 | 0.55429500  | 0.05192500  |
| N | 2.02019900  | 0.47494800  | 0.07019000  |
| C | -3.66473900 | 2.36369500  | 0.10343800  |
| H | -3.70846700 | 3.44817000  | 0.01237900  |
| H | -4.30816300 | 1.93721800  | -0.67038100 |
| H | -4.11386800 | 2.08943300  | 1.06314000  |
| C | 3.79078200  | 2.24366100  | 0.07911200  |
| H | 3.87364400  | 3.09881400  | 0.75372700  |
| H | 4.47123100  | 1.46885100  | 0.42790700  |
| H | 4.13829600  | 2.57479400  | -0.90556800 |
| C | -3.00335800 | -0.37763100 | 0.31835400  |
| C | -3.76894500 | -0.93746000 | -0.72144400 |
| C | -3.24198900 | -0.73863000 | 1.66057100  |
| C | -4.76744500 | -1.86029300 | -0.39373600 |
| C | -4.24697200 | -1.66615000 | 1.94217900  |
| C | -5.00851200 | -2.22831700 | 0.92419300  |
| H | -5.36423100 | -2.29292600 | -1.19171400 |
| H | -4.43092000 | -1.94858400 | 2.97477000  |
| H | -5.78688000 | -2.94808400 | 1.15691600  |
| C | 3.01033000  | -0.52413800 | 0.34888300  |
| C | 3.15950700  | -0.94359900 | 1.68777500  |
| C | 3.79091100  | -1.09146000 | -0.67396200 |
| C | 4.07050100  | -1.96112400 | 1.97478900  |
| C | 4.68706400  | -2.11262700 | -0.34108800 |
| C | 4.82564500  | -2.55375100 | 0.96822500  |
| H | 4.18559800  | -2.29125200 | 3.00302400  |
| H | 5.28597100  | -2.56136800 | -1.12859000 |
| H | 5.52231100  | -3.35141400 | 1.20560300  |
| C | 2.37967500  | -0.28625700 | 2.79946600  |
| H | 2.65234600  | 0.76763900  | 2.91681500  |
| H | 1.30363800  | -0.30900800 | 2.61101600  |
| H | 2.56694000  | -0.78452000 | 3.75252100  |
| C | 3.72714900  | -0.59195900 | -2.09566000 |
| H | 2.73376800  | -0.24000200 | -2.36194800 |
| H | 4.42100600  | 0.24291400  | -2.25046900 |
| H | 4.01251800  | -1.37733300 | -2.79893200 |
| C | -2.42835900 | -0.13639000 | 2.77899000  |
| H | -1.35954900 | -0.31875900 | 2.63742300  |
| H | -2.55232100 | 0.94927100  | 2.84112100  |
| H | -2.71886600 | -0.55971300 | 3.74251500  |

|    |             |             |             |
|----|-------------|-------------|-------------|
| C  | -3.53096700 | -0.58339700 | -2.16808900 |
| H  | -4.37497500 | -0.89711000 | -2.78604800 |
| H  | -3.38320800 | 0.48750300  | -2.32052600 |
| H  | -2.63672700 | -1.07889600 | -2.55222700 |
| C  | -0.03197300 | -1.94664200 | 0.31692900  |
| H  | 0.76234800  | -1.94112600 | 1.06470000  |
| H  | -1.01336100 | -2.05740400 | 0.78023700  |
| C  | 0.20304400  | -2.89796900 | -0.73983700 |
| H  | 1.22407800  | -3.27512600 | -0.82428600 |
| H  | 0.24225700  | -2.14685100 | -1.93223600 |
| C  | -0.86028800 | -3.90959000 | -1.11198200 |
| H  | -0.90651700 | -4.71468700 | -0.36790700 |
| H  | -1.85097300 | -3.44690900 | -1.14208400 |
| H  | -0.66971800 | -4.37451200 | -2.08502100 |
| Co | 0.01551000  | 0.14016000  | -0.14588600 |
| C  | 0.18560200  | -1.33023300 | -2.91202400 |
| H  | 1.12363000  | -1.57306200 | -3.41399900 |
| H  | -0.66535200 | -1.75587500 | -3.44859500 |
| C  | 0.03831800  | -0.00312000 | -2.38092400 |
| H  | -0.91683000 | 0.48596600  | -2.54200500 |
| H  | 0.87337800  | 0.67738600  | -2.52807100 |

**<sup>1</sup>Co(0)-7**

| Atom | x           | y          | z           |
|------|-------------|------------|-------------|
| C    | -1.24402500 | 2.43073400 | 0.19166000  |
| C    | -1.30840800 | 3.81227100 | 0.28834400  |
| C    | -0.12544800 | 4.57373400 | 0.28732700  |
| C    | 1.08043600  | 3.92091900 | 0.16802400  |
| C    | 1.11553700  | 2.51586800 | 0.07056400  |
| N    | -0.05070600 | 1.77256200 | 0.11108200  |
| H    | -0.16797000 | 5.65422600 | 0.36772400  |
| H    | -2.26391500 | 4.31469500 | 0.35075600  |
| H    | 2.00597900  | 4.48349700 | 0.15248900  |
| C    | -2.49233500 | 1.62654400 | 0.09415600  |
| C    | 2.33922200  | 1.77761300 | -0.07593600 |
| N    | 2.23532600  | 0.45303600 | -0.03265100 |
| N    | -2.38568500 | 0.36159500 | -0.08753100 |
| C    | 3.65138000  | 2.50306200 | -0.25246600 |
| H    | 3.63273700  | 3.17911500 | -1.11274800 |
| H    | 3.89235900  | 3.10949700 | 0.62738400  |
| H    | 4.47062500  | 1.80072700 | -0.39807100 |
| C    | -3.82046800 | 2.35322200 | 0.17526400  |
| H    | -3.90864600 | 2.90518200 | 1.11461800  |
| H    | -3.93148100 | 3.07603800 | -0.63753900 |

|   |             |             |             |
|---|-------------|-------------|-------------|
| H | -4.64785300 | 1.64868900  | 0.11546900  |
| C | 3.33546100  | -0.38401300 | -0.37351500 |
| C | 4.06066500  | -1.04540800 | 0.63893200  |
| C | 3.64627000  | -0.59800500 | -1.73384900 |
| C | 5.06499100  | -1.94257000 | 0.26893000  |
| C | 4.65624200  | -1.50832600 | -2.05798800 |
| C | 5.35988000  | -2.18491800 | -1.06877600 |
| H | 5.62539400  | -2.45424400 | 1.04621000  |
| H | 4.89050000  | -1.68438000 | -3.10424100 |
| H | 6.13847100  | -2.89170700 | -1.33770600 |
| C | -3.50398000 | -0.46725600 | -0.35150000 |
| C | -3.94206700 | -0.61139200 | -1.68567800 |
| C | -4.09883900 | -1.21712500 | 0.68376000  |
| C | -4.96440900 | -1.52138400 | -1.96165700 |
| C | -5.12170400 | -2.11122200 | 0.36012000  |
| C | -5.55445300 | -2.27233400 | -0.95144700 |
| H | -5.30013700 | -1.63834900 | -2.98825800 |
| H | -5.58365100 | -2.68846900 | 1.15606300  |
| H | -6.34526900 | -2.97803500 | -1.18438400 |
| C | -3.33830500 | 0.21306400  | -2.79670800 |
| H | -3.68143800 | 1.25333800  | -2.76346300 |
| H | -2.24802300 | 0.24612300  | -2.73919300 |
| H | -3.61569500 | -0.18749500 | -3.77373100 |
| C | -3.65595800 | -1.04346600 | 2.11362700  |
| H | -2.57868500 | -1.17651900 | 2.22188200  |
| H | -3.88156300 | -0.03998100 | 2.49044500  |
| H | -4.15734200 | -1.75960300 | 2.76764200  |
| C | 2.93358000  | 0.15680200  | -2.83042700 |
| H | 1.87414900  | 0.29688900  | -2.61122200 |
| H | 3.35951700  | 1.15718400  | -2.96709900 |
| H | 3.02474900  | -0.36429200 | -3.78606900 |
| C | 3.79189800  | -0.75907000 | 2.09450300  |
| H | 4.03576900  | 0.27816400  | 2.34766500  |
| H | 2.74118300  | -0.89758800 | 2.35111400  |
| H | 4.39258900  | -1.40622800 | 2.73696100  |
| C | 0.04871000  | -1.66013500 | -1.28047700 |
| H | -0.70795800 | -1.04767300 | -1.75184500 |
| H | 1.00985700  | -1.73818300 | -1.77623800 |
| C | -0.22560000 | -2.39190100 | -0.18121600 |
| H | -1.23288200 | -2.36265700 | 0.22588300  |
| H | -0.62613100 | -2.27421300 | 3.13893300  |
| C | 0.70968900  | -3.41287600 | 0.40432000  |
| H | 0.34404500  | -4.41933900 | 0.16755600  |

|    |             |             |             |
|----|-------------|-------------|-------------|
| H  | 1.71919700  | -3.31939600 | -0.00104800 |
| H  | 0.76246800  | -3.34581800 | 1.49174700  |
| Co | 0.37956400  | -0.15028800 | 0.61144000  |
| C  | 0.10968300  | -1.52753700 | 3.45939100  |
| H  | -0.08215800 | -1.34459300 | 4.52661400  |
| H  | 1.09063300  | -2.01302700 | 3.40504000  |
| C  | 0.04094700  | -0.24677600 | 2.62023100  |
| H  | 0.76010800  | 0.48428700  | 3.02079500  |
| H  | -0.94184100 | 0.22283300  | 2.75959600  |

**<sup>1</sup>Co(0)-8**

| Atom | x           | y           | z           |
|------|-------------|-------------|-------------|
| C    | 1.19666600  | 2.55800900  | -0.01270700 |
| C    | 1.21441600  | 3.95017900  | -0.04884700 |
| C    | -0.00001300 | 4.64639800  | -0.07164100 |
| C    | -1.21445400 | 3.95015800  | -0.04874000 |
| C    | -1.19664100 | 2.55801100  | -0.01261300 |
| N    | 0.00000300  | 1.90104300  | -0.00563000 |
| H    | -0.00001700 | 5.73007400  | -0.10243800 |
| H    | 2.15000100  | 4.49667900  | -0.06349400 |
| H    | -2.15006500 | 4.49661800  | -0.06331500 |
| C    | 2.31049300  | 1.63571000  | 0.02025400  |
| C    | -2.31050500 | 1.63571700  | 0.02040600  |
| N    | -1.96662900 | 0.35255400  | 0.04697400  |
| N    | 1.96658600  | 0.35252500  | 0.04685200  |
| C    | -3.73781400 | 2.10825100  | 0.01167600  |
| H    | -3.81391800 | 3.15510000  | 0.30514100  |
| H    | -4.18580700 | 2.01065300  | -0.98316000 |
| H    | -4.35504000 | 1.51893500  | 0.69205400  |
| C    | 3.73785800  | 2.10806700  | 0.01161900  |
| H    | 4.18676600  | 2.00794500  | -0.98253600 |
| H    | 3.81388900  | 3.15559200  | 0.30265000  |
| H    | 4.35441000  | 1.52030000  | 0.69398200  |
| C    | -2.99364000 | -0.64262600 | 0.05295700  |
| C    | -3.52081500 | -1.10415600 | -1.16623000 |
| C    | -3.42529200 | -1.17496100 | 1.28178300  |
| C    | -4.49853700 | -2.10182400 | -1.13269000 |
| C    | -4.40838500 | -2.16663000 | 1.26936700  |
| C    | -4.94546900 | -2.62967200 | 0.07298900  |
| H    | -4.90820000 | -2.47039400 | -2.06878500 |
| H    | -4.74906000 | -2.58413800 | 2.21244300  |
| H    | -5.70366700 | -3.40628100 | 0.08034600  |
| C    | 2.99364500  | -0.64260200 | 0.05289400  |
| C    | 3.42537700  | -1.17480200 | 1.28175400  |

|    |             |             |             |
|----|-------------|-------------|-------------|
| C  | 3.52078700  | -1.10424500 | -1.16626800 |
| C  | 4.40853500  | -2.16640800 | 1.26939600  |
| C  | 4.49858400  | -2.10184000 | -1.13266900 |
| C  | 4.94560900  | -2.62952800 | 0.07304500  |
| H  | 4.74926200  | -2.58381400 | 2.21249900  |
| H  | 4.90822100  | -2.47048800 | -2.06874400 |
| H  | 5.70386100  | -3.40608400 | 0.08045000  |
| C  | 2.83836900  | -0.68716900 | 2.58229500  |
| H  | 3.02546400  | 0.37892100  | 2.74627300  |
| H  | 1.75306200  | -0.82098100 | 2.59934700  |
| H  | 3.26016900  | -1.23216200 | 3.42901200  |
| C  | 3.04668600  | -0.54400700 | -2.48508600 |
| H  | 1.95795900  | -0.46526600 | -2.52056700 |
| H  | 3.44231100  | 0.46030900  | -2.67230500 |
| H  | 3.36803700  | -1.17792500 | -3.31382000 |
| C  | -2.83833200 | -0.68733200 | 2.58234600  |
| H  | -1.75299000 | -0.82086000 | 2.59932400  |
| H  | -3.02570500 | 0.37869400  | 2.74643900  |
| H  | -3.25994900 | -1.23252200 | 3.42902500  |
| C  | -3.04684300 | -0.54371400 | -2.48500700 |
| H  | -3.44255700 | 0.46059900  | -2.67205600 |
| H  | -1.95812300 | -0.46490200 | -2.52056400 |
| H  | -3.36821200 | -1.17754200 | -3.31380200 |
| C  | 0.00000500  | -1.98624900 | 0.21918700  |
| H  | 0.87775700  | -2.30340500 | 0.79866500  |
| H  | -0.87760200 | -2.30339000 | 0.79889500  |
| C  | -0.00017700 | -2.74940300 | -1.11396600 |
| H  | 0.88207500  | -2.51833800 | -1.72085600 |
| H  | -0.88257100 | -2.51830600 | -1.72063600 |
| Co | 0.00000000  | -0.00357600 | 0.06901600  |
| H  | -0.00017900 | -3.83989400 | -0.97331200 |

**<sup>1</sup>Co(0)-TS-3/9**

| Atom | x           | y          | z           |
|------|-------------|------------|-------------|
| C    | -1.22413900 | 2.49189100 | -0.01006300 |
| C    | -1.25398500 | 3.88030200 | 0.02525200  |
| C    | -0.05406900 | 4.60104100 | 0.03968200  |
| C    | 1.14928300  | 3.90283100 | -0.02514200 |
| C    | 1.14298400  | 2.50890900 | -0.06057100 |
| N    | -0.03712000 | 1.80909800 | -0.01241100 |
| H    | -0.06259900 | 5.68422900 | 0.07930400  |
| H    | -2.20114600 | 4.40640600 | 0.02904300  |
| H    | 2.08865300  | 4.44268700 | -0.05312600 |
| C    | -2.41785000 | 1.64952000 | -0.09422900 |

|   |             |             |             |
|---|-------------|-------------|-------------|
| C | 2.33077100  | 1.68239700  | -0.18402900 |
| N | 2.13357600  | 0.38984600  | -0.11559300 |
| N | -2.20833900 | 0.36783700  | -0.09204300 |
| C | 3.67465400  | 2.33121900  | -0.41082400 |
| H | 3.65154700  | 2.99521500  | -1.27965200 |
| H | 3.97227800  | 2.93892600  | 0.44971400  |
| H | 4.44994400  | 1.58509000  | -0.57584500 |
| C | -3.77868600 | 2.29440800  | -0.20496100 |
| H | -4.00171200 | 2.89922700  | 0.67919100  |
| H | -3.82928200 | 2.96048300  | -1.07095300 |
| H | -4.56169700 | 1.54516500  | -0.30775900 |
| C | 3.21041900  | -0.52878500 | -0.21121700 |
| C | 4.01103200  | -0.79537100 | 0.91889500  |
| C | 3.41344000  | -1.22738000 | -1.41930500 |
| C | 5.00553400  | -1.77161300 | 0.81848200  |
| C | 4.42223100  | -2.19098600 | -1.47476200 |
| C | 5.21505400  | -2.46902800 | -0.36592800 |
| H | 5.62146800  | -1.98573100 | 1.68751900  |
| H | 4.58517200  | -2.72979400 | -2.40391400 |
| H | 5.99060400  | -3.22600900 | -0.42456900 |
| C | -3.26499900 | -0.57377700 | -0.15712800 |
| C | -3.53682700 | -1.21176300 | -1.38498000 |
| C | -3.96062600 | -0.93529200 | 1.01489400  |
| C | -4.51380600 | -2.20812100 | -1.41953000 |
| C | -4.92692300 | -1.94107600 | 0.93295900  |
| C | -5.20665500 | -2.57749900 | -0.27109900 |
| H | -4.73034500 | -2.70077400 | -2.36320200 |
| H | -5.46386500 | -2.22812700 | 1.83276900  |
| H | -5.95772100 | -3.35973300 | -0.31388900 |
| C | -2.80253200 | -0.80639800 | -2.63850600 |
| H | -3.04399400 | 0.21931300  | -2.93696100 |
| H | -1.71880800 | -0.84076000 | -2.49839100 |
| H | -3.06069000 | -1.46224800 | -3.47240300 |
| C | -3.68082100 | -0.24908600 | 2.33017800  |
| H | -2.61131100 | -0.09743600 | 2.48894400  |
| H | -4.15026900 | 0.74009300  | 2.37915900  |
| H | -4.07436000 | -0.83304000 | 3.16483400  |
| C | 2.57143400  | -0.92413600 | -2.63302000 |
| H | 1.50618800  | -1.05357600 | -2.42238900 |
| H | 2.69889400  | 0.11017400  | -2.96828100 |
| H | 2.83651000  | -1.57865200 | -3.46588900 |
| C | 3.80799900  | -0.04213700 | 2.21096200  |
| H | 4.25380200  | 0.95819100  | 2.17111100  |

|    |             |             |             |
|----|-------------|-------------|-------------|
| H  | 2.74853400  | 0.09208100  | 2.43726200  |
| H  | 4.27472400  | -0.56905600 | 3.04590700  |
| C  | -0.01102700 | -2.13157100 | -0.07492800 |
| H  | -0.86063000 | -2.38228900 | -0.70456700 |
| H  | 0.95023700  | -2.51151500 | -0.41196000 |
| C  | -0.21684800 | -1.93147500 | 1.30284500  |
| H  | -1.24506600 | -1.98301200 | 1.65047600  |
| H  | -0.13741500 | -0.25416500 | 1.68754300  |
| C  | 0.79978700  | -2.37776700 | 2.33098200  |
| H  | 0.65497100  | -3.44474900 | 2.53841500  |
| H  | 1.82009200  | -2.25089400 | 1.96703300  |
| H  | 0.70029300  | -1.83750500 | 3.27561400  |
| Co | 0.00967500  | -0.10782300 | 0.16077000  |

**<sup>1</sup>Co(0)-9**

| Atom | x           | y           | z           |
|------|-------------|-------------|-------------|
| C    | 1.20182400  | 2.48713400  | -0.05973400 |
| C    | 1.23280800  | 3.87416600  | -0.17084900 |
| C    | 0.03857700  | 4.59514300  | -0.20394600 |
| C    | -1.16248800 | 3.89874800  | -0.11215200 |
| C    | -1.15146700 | 2.50833100  | -0.00520400 |
| N    | 0.02040600  | 1.80394700  | 0.00456000  |
| H    | 0.04726600  | 5.67546800  | -0.29283900 |
| H    | 2.18039100  | 4.39570100  | -0.22520600 |
| H    | -2.10341100 | 4.43536400  | -0.12425100 |
| C    | 2.41671300  | 1.66239700  | 0.00342100  |
| C    | -2.36389100 | 1.69694900  | 0.08287800  |
| N    | -2.18118500 | 0.41149600  | 0.09252400  |
| N    | 2.23792200  | 0.38460400  | 0.07720600  |
| C    | -3.71214600 | 2.37424200  | 0.13689800  |
| H    | -3.76671800 | 3.08276200  | 0.96839500  |
| H    | -3.90757300 | 2.93863200  | -0.78047200 |
| H    | -4.51245000 | 1.64650700  | 0.25833500  |
| C    | 3.76819400  | 2.33711700  | -0.02676200 |
| H    | 3.91135200  | 2.88930300  | -0.96057200 |
| H    | 3.87027200  | 3.05551800  | 0.79156900  |
| H    | 4.57129900  | 1.60747200  | 0.05980700  |
| C    | -3.27511800 | -0.49272700 | 0.14811700  |
| C    | -3.87536300 | -0.93489700 | -1.04770500 |
| C    | -3.68440600 | -1.00066000 | 1.39702500  |
| C    | -4.88497500 | -1.89712500 | -0.96739300 |
| C    | -4.69894900 | -1.96015900 | 1.42833500  |
| C    | -5.29763800 | -2.41182500 | 0.25718400  |
| H    | -5.35098100 | -2.24659400 | -1.88440000 |



|    |             |             |             |
|----|-------------|-------------|-------------|
| H  | -5.01911900 | -2.35714400 | 2.38755800  |
| H  | -6.08018100 | -3.16274900 | 0.29818800  |
| C  | 3.32202200  | -0.52732900 | 0.13639900  |
| C  | 3.75030700  | -1.00321100 | 1.39171100  |
| C  | 3.88170200  | -1.02417000 | -1.05813100 |
| C  | 4.74881400  | -1.97817000 | 1.43116900  |
| C  | 4.87679300  | -2.00073500 | -0.96920300 |
| C  | 5.31160500  | -2.47933300 | 0.26201800  |
| H  | 5.08493800  | -2.34920400 | 2.39530100  |
| H  | 5.31203100  | -2.39136900 | -1.88471400 |
| H  | 6.08178000  | -3.24245800 | 0.31019900  |
| C  | 3.15669800  | -0.45394300 | 2.66542600  |
| H  | 3.46330100  | 0.58300600  | 2.84234200  |
| H  | 2.06421600  | -0.45161400 | 2.63415100  |
| H  | 3.47360500  | -1.04074100 | 3.52989800  |
| C  | 3.42145600  | -0.50970000 | -2.39973700 |
| H  | 2.33226100  | -0.44262200 | -2.45071400 |
| H  | 3.80969000  | 0.49558300  | -2.60118900 |
| H  | 3.77039500  | -1.15848500 | -3.20585300 |
| C  | -3.05264700 | -0.50348800 | 2.67337100  |
| H  | -1.96150700 | -0.53473800 | 2.61940500  |
| H  | -3.32426100 | 0.53721900  | 2.88195700  |
| H  | -3.37245400 | -1.10322300 | 3.52790900  |
| C  | -3.44596500 | -0.37706400 | -2.38196600 |
| H  | -3.81416900 | 0.64504700  | -2.52849000 |
| H  | -2.35796800 | -0.33603500 | -2.46681000 |
| H  | -3.83859200 | -0.98277800 | -3.20143700 |
| C  | -0.19822500 | -2.10255400 | 0.67390300  |
| H  | 0.45997600  | -2.01511200 | 1.53537600  |
| H  | -1.23604200 | -2.34024600 | 0.88583500  |
| C  | 0.32168000  | -2.28262100 | -0.58541500 |
| H  | 1.40177500  | -2.28848800 | -0.70019300 |
| H  | -0.01761300 | -0.13388300 | -1.69058800 |
| C  | -0.45254200 | -2.88905500 | -1.72546200 |
| H  | -0.25970900 | -3.96945300 | -1.76940500 |
| H  | -1.52826400 | -2.75081800 | -1.60245400 |
| H  | -0.16046600 | -2.46355700 | -2.68714500 |
| Co | -0.03419700 | -0.15034700 | -0.14573100 |

**<sup>1</sup>Co(0)-10**

| Atom | x          | y          | z          |
|------|------------|------------|------------|
| C    | 1.18677900 | 2.37112400 | 0.07071000 |
| C    | 1.20880300 | 3.73077700 | 0.36482600 |
| C    | 0.00000000 | 4.42652800 | 0.48011500 |

|   |             |             |             |
|---|-------------|-------------|-------------|
| C | -1.20880300 | 3.73077600  | 0.36482900  |
| C | -1.18677900 | 2.37112300  | 0.07071200  |
| N | 0.00000000  | 1.74031800  | -0.17481500 |
| H | 0.00000000  | 5.48488500  | 0.71402900  |
| H | 2.14867600  | 4.24457700  | 0.53113100  |
| H | -2.14867600 | 4.24457600  | 0.53113700  |
| C | 2.33188700  | 1.46921600  | 0.06896900  |
| C | -2.33188700 | 1.46921500  | 0.06897100  |
| N | -2.03739000 | 0.19220200  | 0.00715900  |
| N | 2.03739000  | 0.19220200  | 0.00715600  |
| C | -3.73175400 | 2.02061100  | 0.15180000  |
| H | -4.47074100 | 1.22271400  | 0.19424700  |
| H | -3.85518900 | 2.64177000  | 1.04357700  |
| H | -3.95761500 | 2.65176900  | -0.71322900 |
| C | 3.73175400  | 2.02061300  | 0.15179600  |
| H | 3.85519100  | 2.64176700  | 1.04357600  |
| H | 4.47074200  | 1.22271600  | 0.19423900  |
| H | 3.95761400  | 2.65177400  | -0.71323000 |
| C | -3.04823500 | -0.81404000 | 0.03358500  |
| C | -3.70490000 | -1.19936400 | -1.15054300 |
| C | -3.30618600 | -1.46373400 | 1.25528900  |
| C | -4.63874200 | -2.23622900 | -1.08056700 |
| C | -4.24971500 | -2.49254900 | 1.27822500  |
| C | -4.91601800 | -2.87931200 | 0.12064400  |
| H | -5.14929600 | -2.54481600 | -1.98817400 |
| H | -4.45736000 | -2.99767300 | 2.21718700  |
| H | -5.64273000 | -3.68482800 | 0.15270700  |
| C | 3.04823500  | -0.81403900 | 0.03358500  |
| C | 3.30618600  | -1.46373100 | 1.25528900  |
| C | 3.70489800  | -1.19936800 | -1.15054400 |
| C | 4.24971400  | -2.49254800 | 1.27822700  |
| C | 4.63873800  | -2.23623400 | -1.08056600 |
| C | 4.91601400  | -2.87931500 | 0.12064600  |
| H | 4.45735900  | -2.99767000 | 2.21719000  |
| H | 5.14929000  | -2.54482400 | -1.98817300 |
| H | 5.64272500  | -3.68483200 | 0.15271100  |
| C | 2.57759300  | -1.05651800 | 2.51177200  |
| H | 2.81441900  | -0.03004600 | 2.81009900  |
| H | 1.49282300  | -1.09665500 | 2.37566000  |
| H | 2.83965100  | -1.71198300 | 3.34457400  |
| C | 3.39695900  | -0.53010000 | -2.46620200 |
| H | 2.32685100  | -0.57345900 | -2.68528700 |
| H | 3.68523800  | 0.52654200  | -2.46985400 |

|    |             |             |             |
|----|-------------|-------------|-------------|
| H  | 3.93298500  | -1.01759200 | -3.28281900 |
| C  | -2.57759100 | -1.05652500 | 2.51177100  |
| H  | -1.49282100 | -1.09666200 | 2.37565700  |
| H  | -2.81441500 | -0.03005300 | 2.81010100  |
| H  | -2.83964700 | -1.71199100 | 3.34457300  |
| C  | -3.39696100 | -0.53009300 | -2.46620000 |
| H  | -3.68524000 | 0.52654900  | -2.46985100 |
| H  | -2.32685300 | -0.57345300 | -2.68528500 |
| H  | -3.93298700 | -1.01758400 | -3.28281900 |
| H  | 0.00000300  | -1.17469800 | -1.87940400 |
| Co | 0.00000200  | -0.14968800 | -0.65013400 |

$^{1/2}\text{Co}(+)$

$^{1/2}\text{Co}(+)-1$

| Atom | x           | y           | z           |
|------|-------------|-------------|-------------|
| C    | 1.17635900  | 2.47981300  | 0.00491500  |
| C    | 1.21366000  | 3.87448200  | 0.00737000  |
| C    | 0.00066100  | 4.56623300  | 0.00829200  |
| C    | -1.21245800 | 3.87470400  | 0.00627200  |
| C    | -1.17550400 | 2.47996400  | 0.00386600  |
| N    | 0.00040500  | 1.84466000  | 0.00340600  |
| H    | 0.00076700  | 5.65005400  | 0.01031400  |
| H    | 2.15325200  | 4.41271800  | 0.00833700  |
| H    | -2.15190800 | 4.41312300  | 0.00641300  |
| C    | 2.32105000  | 1.52458800  | 0.00089400  |
| C    | -2.32053800 | 1.52488300  | -0.00128700 |
| N    | -1.98553000 | 0.27198100  | 0.00770700  |
| N    | 1.98546900  | 0.27201900  | 0.00989200  |
| C    | -3.71797400 | 2.05996600  | -0.01711600 |
| H    | -3.89007600 | 2.69797200  | 0.85541500  |
| H    | -3.87662700 | 2.68254300  | -0.90328000 |
| H    | -4.45735400 | 1.26337200  | -0.01579400 |
| C    | 3.71882200  | 2.05887200  | -0.01347400 |
| H    | 3.87931100  | 2.68024900  | -0.90015100 |
| H    | 3.88986600  | 2.69787300  | 0.85856900  |
| H    | 4.45774900  | 1.26187300  | -0.00998100 |
| C    | -3.00054600 | -0.75404100 | -0.00306800 |
| C    | -3.44185600 | -1.25060000 | -1.23891900 |
| C    | -3.46289000 | -1.25932700 | 1.22185100  |
| C    | -4.39747400 | -2.26905200 | -1.22434300 |
| C    | -4.41863000 | -2.27729300 | 1.18382500  |
| C    | -4.88646200 | -2.77743500 | -0.02624000 |
| H    | -4.75541300 | -2.66924200 | -2.16739600 |
| H    | -4.79303000 | -2.68372400 | 2.11772300  |

|    |             |             |             |
|----|-------------|-------------|-------------|
| H  | -5.62636900 | -3.57016800 | -0.03548100 |
| C  | 3.00020700  | -0.75439100 | -0.00086900 |
| C  | 3.45607000  | -1.26383600 | 1.22465300  |
| C  | 3.44776300  | -1.24693800 | -1.23621000 |
| C  | 4.41164800  | -2.28198600 | 1.18833300  |
| C  | 4.40282900  | -2.26596100 | -1.21992200 |
| C  | 4.88540000  | -2.77845900 | -0.02097100 |
| H  | 4.78122600  | -2.69144500 | 2.12286000  |
| H  | 4.76544400  | -2.66331100 | -2.16241900 |
| H  | 5.62501300  | -3.57146800 | -0.02902800 |
| C  | 2.92663100  | -0.74386800 | 2.53772200  |
| H  | 3.16090500  | 0.31443300  | 2.69342400  |
| H  | 1.83788300  | -0.84541400 | 2.59810500  |
| H  | 3.35481200  | -1.29569700 | 3.37487300  |
| C  | 2.91464500  | -0.70737300 | -2.54032100 |
| H  | 1.82343200  | -0.77875900 | -2.58910100 |
| H  | 3.17622100  | 0.34480100  | -2.69502500 |
| H  | 3.31822700  | -1.26642900 | -3.38486600 |
| C  | -2.94053200 | -0.73578900 | 2.53634700  |
| H  | -1.85162200 | -0.83198100 | 2.60108800  |
| H  | -3.18064500 | 0.32142800  | 2.69044300  |
| H  | -3.36921400 | -1.28906400 | 3.37228900  |
| C  | -2.90143400 | -0.71515400 | -2.54167100 |
| H  | -3.16102800 | 0.33686800  | -2.70056000 |
| H  | -1.81004000 | -0.78775800 | -2.58434400 |
| H  | -3.30096800 | -1.27607000 | -3.38689400 |
| Co | 0.00018300  | -0.08428900 | 0.02603200  |
| C  | -0.00003600 | -2.03166400 | 0.04887500  |
| H  | -0.01450600 | -2.39141400 | -0.99070500 |
| H  | 0.89528500  | -2.44766700 | 0.51966300  |
| H  | -0.88441900 | -2.44455200 | 0.54277900  |

**<sup>1/2</sup>Co(+)-2**

| Atom | x           | y          | z           |
|------|-------------|------------|-------------|
| C    | 1.17038600  | 2.43915600 | -0.33753900 |
| C    | 1.20319800  | 3.81132600 | -0.59074400 |
| C    | -0.00598300 | 4.50047300 | -0.68225600 |
| C    | -1.21431300 | 3.81485400 | -0.55842100 |
| C    | -1.17841900 | 2.44284800 | -0.30562300 |
| N    | -0.00284600 | 1.81330600 | -0.16275000 |
| H    | -0.00696600 | 5.56726400 | -0.87320200 |
| H    | 2.14282600  | 4.33300900 | -0.72116900 |
| H    | -2.15570700 | 4.33889300 | -0.66464000 |
| C    | 2.32526800  | 1.50528700 | -0.29840100 |

|   |             |             |             |
|---|-------------|-------------|-------------|
| C | -2.33359500 | 1.51090400  | -0.24435800 |
| N | -2.02548200 | 0.26669100  | -0.05037300 |
| N | 2.01785200  | 0.26087600  | -0.10564500 |
| C | -3.71443500 | 2.04868100  | -0.47152300 |
| H | -3.97262600 | 2.78063600  | 0.30003100  |
| H | -3.76855700 | 2.56668500  | -1.43374800 |
| H | -4.46219000 | 1.25980700  | -0.46399800 |
| C | 3.70494300  | 2.04260400  | -0.53253600 |
| H | 3.74054600  | 2.61211000  | -1.46567500 |
| H | 3.99102300  | 2.72730700  | 0.27221600  |
| H | 4.44414400  | 1.24746300  | -0.58610600 |
| C | -3.04939900 | -0.75111900 | -0.08873000 |
| C | -3.21737100 | -1.46063000 | -1.29108600 |
| C | -3.81587300 | -1.03376600 | 1.05474500  |
| C | -4.15860200 | -2.49144700 | -1.31822900 |
| C | -4.74122000 | -2.07849700 | 0.97756400  |
| C | -4.91010200 | -2.80785600 | -0.19292000 |
| H | -4.30023400 | -3.05039300 | -2.23754400 |
| H | -5.33818000 | -2.31664500 | 1.85198700  |
| H | -5.63033700 | -3.61772200 | -0.22945500 |
| C | 3.03925300  | -0.75814300 | -0.12757400 |
| C | 3.84638500  | -0.99228000 | 0.99803400  |
| C | 3.15858100  | -1.52954800 | -1.30025500 |
| C | 4.75453900  | -2.05557800 | 0.94075900  |
| C | 4.08882800  | -2.56798600 | -1.31140000 |
| C | 4.87460800  | -2.84156400 | -0.19624600 |
| H | 5.37830800  | -2.25855600 | 1.80574000  |
| H | 4.19546900  | -3.16980500 | -2.20801900 |
| H | 5.58344600  | -3.66196800 | -0.21819700 |
| C | 3.81708200  | -0.12367700 | 2.23364000  |
| H | 4.61458300  | 0.62706300  | 2.20319700  |
| H | 2.87704700  | 0.41091800  | 2.35998500  |
| H | 3.98354100  | -0.71922800 | 3.13327300  |
| C | 2.34983200  | -1.21675600 | -2.53418100 |
| H | 1.27953200  | -1.16887500 | -2.32160800 |
| H | 2.63456900  | -0.25354700 | -2.97151900 |
| H | 2.50216100  | -1.97730900 | -3.30059400 |
| C | -3.69718600 | -0.23003600 | 2.32685100  |
| H | -2.66549600 | -0.13356300 | 2.66660100  |
| H | -4.09296200 | 0.78457300  | 2.20832100  |
| H | -4.26398100 | -0.69835900 | 3.13200500  |
| C | -2.44949300 | -1.09768600 | -2.53778700 |
| H | -2.78393500 | -0.14122800 | -2.95497800 |

|    |             |             |             |
|----|-------------|-------------|-------------|
| H  | -1.37714900 | -1.00759900 | -2.35009400 |
| H  | -2.58869400 | -1.85226700 | -3.31261900 |
| C  | -0.02769200 | -2.05367400 | 0.14838300  |
| H  | -0.11498100 | -2.36554700 | -0.90028700 |
| H  | 0.88908300  | -2.49584300 | 0.54607200  |
| H  | -0.88530100 | -2.47567600 | 0.67875800  |
| C  | 0.13449900  | -0.54722300 | 2.66847300  |
| H  | 1.08896300  | -1.05764600 | 2.68946300  |
| H  | -0.73675800 | -1.18057300 | 2.77365900  |
| C  | 0.04289200  | 0.78977100  | 2.64220000  |
| H  | -0.90992200 | 1.30136400  | 2.71879000  |
| H  | 0.92189900  | 1.42437900  | 2.63585100  |
| Co | -0.00442600 | -0.08799400 | 0.18680800  |

 **$^{1/2}\text{Co}(+)\text{-TS-2/3}$** 

| Atom | x           | y           | z           |
|------|-------------|-------------|-------------|
| C    | 1.17516800  | 2.43931000  | -0.24115900 |
| C    | 1.20121900  | 3.81606100  | -0.46642000 |
| C    | -0.00202400 | 4.51097700  | -0.55049600 |
| C    | -1.20353900 | 3.81551900  | -0.44810700 |
| C    | -1.17312800 | 2.43908100  | -0.22160200 |
| N    | 0.00193800  | 1.79416100  | -0.07368200 |
| H    | -0.00354100 | 5.58122000  | -0.72052200 |
| H    | 2.14252800  | 4.33746900  | -0.58210100 |
| H    | -2.14674500 | 4.33634700  | -0.55009400 |
| C    | 2.36857100  | 1.55408300  | -0.23914300 |
| C    | -2.36567700 | 1.55375100  | -0.19830600 |
| N    | -2.11132500 | 0.29377000  | -0.08753400 |
| N    | 2.11187300  | 0.29416500  | -0.13602500 |
| C    | -3.72772900 | 2.16350700  | -0.37228500 |
| H    | -3.94357600 | 2.87427500  | 0.43084500  |
| H    | -3.78425500 | 2.71687100  | -1.31434500 |
| H    | -4.50574500 | 1.40384600  | -0.37889900 |
| C    | 3.73033000  | 2.16039800  | -0.42302200 |
| H    | 3.76250700  | 2.76941100  | -1.33079300 |
| H    | 3.98206600  | 2.81730900  | 0.41507100  |
| H    | 4.49754600  | 1.39365600  | -0.50235500 |
| C    | -3.15131700 | -0.69275800 | -0.15270000 |
| C    | -3.30654200 | -1.38652700 | -1.36805600 |
| C    | -3.92925900 | -1.00276600 | 0.97871900  |
| C    | -4.26388800 | -2.40077500 | -1.43297300 |
| C    | -4.87103100 | -2.02926700 | 0.86354700  |
| C    | -5.04065900 | -2.72577900 | -0.32716400 |
| H    | -4.39967700 | -2.93828800 | -2.36599100 |

|    |             |             |             |
|----|-------------|-------------|-------------|
| H  | -5.48051600 | -2.28081600 | 1.72558200  |
| H  | -5.77772600 | -3.51847800 | -0.39303600 |
| C  | 3.13559700  | -0.70672200 | -0.19507600 |
| C  | 3.95832800  | -0.97665300 | 0.91461300  |
| C  | 3.22452900  | -1.46465600 | -1.38078300 |
| C  | 4.85938600  | -2.04224400 | 0.81808700  |
| C  | 4.14864300  | -2.50827400 | -1.43098100 |
| C  | 4.95653100  | -2.80499000 | -0.33821700 |
| H  | 5.49573900  | -2.26900700 | 1.66780200  |
| H  | 4.23425600  | -3.09367900 | -2.34085000 |
| H  | 5.66229100  | -3.62672400 | -0.39019600 |
| C  | 3.92740200  | -0.14510600 | 2.17512000  |
| H  | 4.58873000  | 0.72484100  | 2.09635200  |
| H  | 2.93190900  | 0.23049000  | 2.41181600  |
| H  | 4.27538000  | -0.72587500 | 3.03079200  |
| C  | 2.39216800  | -1.12367000 | -2.59232900 |
| H  | 1.33189000  | -1.00487400 | -2.35160100 |
| H  | 2.71342700  | -0.18158100 | -3.04935500 |
| H  | 2.47617400  | -1.89944100 | -3.35424000 |
| C  | -3.77003800 | -0.27443500 | 2.29153800  |
| H  | -2.79205800 | -0.45695300 | 2.74427700  |
| H  | -3.87628900 | 0.80896000  | 2.18824700  |
| H  | -4.52397900 | -0.60455100 | 3.00679900  |
| C  | -2.49093100 | -1.02508100 | -2.58480900 |
| H  | -2.75615100 | -0.03677600 | -2.97495400 |
| H  | -1.41887400 | -0.99892100 | -2.36835600 |
| H  | -2.65102600 | -1.74446200 | -3.38863500 |
| C  | -0.08586400 | -2.10384000 | 0.53782200  |
| H  | 0.20695600  | -1.91082500 | -0.51173400 |
| H  | 0.57009600  | -2.90260700 | 0.87113300  |
| H  | -1.12109100 | -2.43304800 | 0.57012700  |
| C  | 0.18817400  | -1.14433800 | 2.26011100  |
| H  | 1.17847300  | -1.53639800 | 2.45952700  |
| H  | -0.59554900 | -1.76098500 | 2.68790800  |
| C  | 0.03344600  | 0.27734200  | 2.33542300  |
| H  | -0.90823600 | 0.68594400  | 2.68840100  |
| H  | 0.89553100  | 0.87682100  | 2.61203700  |
| Co | 0.00796100  | -0.04965700 | 0.37310800  |

 **$^{1/2}\text{Co}(+)-3$** 

| Atom | x          | y          | z           |
|------|------------|------------|-------------|
| C    | 1.17470800 | 2.69827300 | -0.08589800 |
| C    | 1.21225500 | 4.09101800 | -0.16459400 |
| C    | 0.00017100 | 4.78233000 | -0.20567600 |

|   |             |             |             |
|---|-------------|-------------|-------------|
| C | -1.21196800 | 4.09110100  | -0.16462600 |
| C | -1.17451500 | 2.69836000  | -0.08593200 |
| N | 0.00007400  | 2.06124200  | -0.05462000 |
| H | 0.00020500  | 5.86439500  | -0.26767600 |
| H | 2.15199000  | 4.62815500  | -0.19336300 |
| H | -2.15166200 | 4.62830900  | -0.19341300 |
| C | 2.32346600  | 1.75177800  | -0.02165100 |
| C | -2.32330500 | 1.75191900  | -0.02173500 |
| N | -1.99775000 | 0.49924800  | 0.06103600  |
| N | 1.99785900  | 0.49910800  | 0.06097800  |
| C | -3.71737800 | 2.29689500  | -0.04765500 |
| H | -3.86216700 | 3.00650400  | 0.77273000  |
| H | -3.89534600 | 2.84493500  | -0.97824300 |
| H | -4.46234900 | 1.51033900  | 0.03885900  |
| C | 3.71755600  | 2.29671000  | -0.04742800 |
| H | 3.89560100  | 2.84479100  | -0.97797800 |
| H | 3.86231300  | 3.00627500  | 0.77300000  |
| H | 4.46249400  | 1.51012600  | 0.03908700  |
| C | -3.02372100 | -0.51346300 | 0.11431200  |
| C | -3.56707200 | -0.99711600 | -1.08654100 |
| C | -3.40441800 | -1.01570700 | 1.36931300  |
| C | -4.52298900 | -2.01278900 | -1.00314400 |
| C | -4.36848400 | -2.02546700 | 1.39986900  |
| C | -4.92385300 | -2.52313900 | 0.22612600  |
| H | -4.95417400 | -2.40629900 | -1.91800300 |
| H | -4.68089400 | -2.42692400 | 2.35840800  |
| H | -5.66645000 | -3.31224600 | 0.26951200  |
| C | 3.02377700  | -0.51368400 | 0.11427900  |
| C | 3.40440900  | -1.01599200 | 1.36927400  |
| C | 3.56714700  | -0.99729300 | -1.08657400 |
| C | 4.36841600  | -2.02580500 | 1.39980500  |
| C | 4.52302500  | -2.01301000 | -1.00320300 |
| C | 4.92380200  | -2.52344800 | 0.22605400  |
| H | 4.68076400  | -2.42735400 | 2.35832600  |
| H | 4.95422000  | -2.40648900 | -1.91806900 |
| H | 5.66635500  | -3.31259700 | 0.26944600  |
| C | 2.80555200  | -0.47858600 | 2.64479900  |
| H | 3.05847800  | 0.57417300  | 2.80922900  |
| H | 1.71321700  | -0.54987900 | 2.63903700  |
| H | 3.16699500  | -1.03663600 | 3.50892200  |
| C | 3.15619700  | -0.43968900 | -2.42792600 |
| H | 2.07191500  | -0.33243400 | -2.51645900 |
| H | 3.59491500  | 0.54715000  | -2.61336900 |



|    |             |             |             |
|----|-------------|-------------|-------------|
| H  | 3.48926700  | -1.09208000 | -3.23569000 |
| C  | -2.80558600 | -0.47825600 | 2.64483200  |
| H  | -1.71326500 | -0.54978000 | 2.63918700  |
| H  | -3.05829900 | 0.57457800  | 2.80909400  |
| H  | -3.16722700 | -1.03612300 | 3.50899000  |
| C  | -3.15602500 | -0.43966200 | -2.42792500 |
| H  | -3.59480200 | 0.54711200  | -2.61356400 |
| H  | -2.07174400 | -0.33232800 | -2.51637100 |
| H  | -3.48895600 | -1.09219700 | -3.23563000 |
| C  | -0.00014300 | -1.82476600 | 0.27520700  |
| H  | 0.88300200  | -2.12098300 | 0.85503300  |
| H  | -0.88371300 | -2.12041900 | 0.85468900  |
| C  | -0.00015000 | -2.57186300 | -1.06433800 |
| H  | 0.87760900  | -2.28894300 | -1.65822400 |
| H  | -0.87728900 | -2.28810900 | -1.65874800 |
| C  | -0.00085800 | -4.09984400 | -0.90012400 |
| H  | 0.88156300  | -4.43565000 | -0.34804500 |
| H  | -0.88388400 | -4.43494500 | -0.34859300 |
| H  | -0.00075000 | -4.60673400 | -1.86995900 |
| Co | 0.00002600  | 0.12638100  | 0.09084100  |

 **$^{1/2}\text{Co}(+)-4$** 

| Atom | x           | y           | z           |
|------|-------------|-------------|-------------|
| N    | -0.12730100 | 2.01706300  | -0.08560000 |
| C    | -1.32453400 | 2.60543900  | -0.23882700 |
| C    | -2.45225400 | 1.64121200  | -0.23377500 |
| N    | -2.11654500 | 0.39819800  | -0.09654700 |
| C    | -3.12321100 | -0.63223400 | -0.16987300 |
| C    | -3.25937300 | -1.31581600 | -1.39536200 |
| C    | -2.47422800 | -0.90447100 | -2.61574900 |
| H    | -2.62515500 | -1.61354200 | -3.43031600 |
| C    | -4.17693600 | -2.36312500 | -1.46640500 |
| C    | -4.93580800 | -2.73008300 | -0.35915600 |
| C    | -4.79956500 | -2.03095800 | 0.83118900  |
| C    | -3.90233700 | -0.96311900 | 0.95060300  |
| C    | -3.85900800 | -0.19407400 | 2.25038800  |
| H    | -2.97749900 | 0.43678200  | 2.34712600  |
| H    | -5.40322400 | -2.30595700 | 1.69083800  |
| H    | -4.29509000 | -2.89710000 | -2.40360500 |
| C    | -3.84722100 | 2.15637500  | -0.43473100 |
| H    | -4.14092500 | 2.80190800  | 0.39900800  |
| H    | -3.90644900 | 2.76036400  | -1.34448700 |
| H    | -4.56889200 | 1.34746800  | -0.51263700 |
| C    | -1.41541500 | 3.98313800  | -0.44440900 |

|   |             |             |             |
|---|-------------|-------------|-------------|
| C | -0.23950500 | 4.72794100  | -0.51570700 |
| C | 0.99430900  | 4.08716200  | -0.42099300 |
| C | 1.01699800  | 2.70691000  | -0.21493100 |
| C | 2.22068900  | 1.84046200  | -0.19486000 |
| N | 1.99175100  | 0.57403600  | -0.04529900 |
| C | 3.08738200  | -0.36112200 | -0.13844700 |
| C | 3.33384800  | -0.96174600 | -1.38561700 |
| C | 4.34596700  | -1.92166200 | -1.46232600 |
| C | 5.09855500  | -2.26364200 | -0.34568700 |
| C | 4.85907800  | -1.63095000 | 0.86851500  |
| C | 3.85544200  | -0.66777300 | 0.99867600  |
| H | 5.45945700  | -1.88455500 | 1.73619700  |
| H | 4.54653300  | -2.39908900 | -2.41608500 |
| C | 3.56634500  | 2.46906000  | -0.40945700 |
| H | 3.77913800  | 3.19815600  | 0.37826500  |
| H | 4.36232500  | 1.72920600  | -0.41903000 |
| H | 3.58808800  | 3.01042500  | -1.35990000 |
| H | 1.91377700  | 4.65170800  | -0.51344700 |
| H | -0.28444600 | 5.79975900  | -0.66892500 |
| H | -2.37729300 | 4.46713600  | -0.55410500 |
| H | 5.87738300  | -3.01394600 | -0.42321000 |
| C | 3.64496500  | 0.02586000  | 2.32229500  |
| H | 3.84084000  | 1.10159200  | 2.25988700  |
| H | -5.63615300 | -3.55515200 | -0.42895800 |
| C | 2.58631500  | -0.54882200 | -2.63033100 |
| H | 2.73222100  | -1.27595300 | -3.43003500 |
| C | -0.00111000 | -1.87416500 | -0.10055400 |
| H | -1.04850500 | -2.18872100 | -0.14103300 |
| H | 0.36857700  | -1.85821300 | -1.13947700 |
| H | -1.40189800 | -0.85212600 | -2.41448000 |
| H | -2.78163100 | 0.08107000  | -2.98247700 |
| H | -3.87898500 | -0.87098700 | 3.10731200  |
| H | -4.73484600 | 0.45665300  | 2.34515800  |
| H | 4.31875700  | -0.37735900 | 3.07891500  |
| H | 2.62637800  | -0.09318100 | 2.69641000  |
| H | 2.94105500  | 0.41736900  | -3.00707400 |
| H | 1.51235600  | -0.44976400 | -2.46209900 |
| C | 0.86639200  | -4.26796900 | -0.00107000 |
| C | 0.80350500  | -2.89926800 | 0.69551000  |
| H | 1.41885900  | -4.99424000 | 0.60239000  |
| H | 1.36560700  | -4.19666000 | -0.97178000 |
| H | -0.13536900 | -4.67277800 | -0.17312800 |
| H | 1.82652000  | -2.55074700 | 0.87101900  |

|    |             |             |            |
|----|-------------|-------------|------------|
| H  | 0.35082700  | -3.04126600 | 1.68323900 |
| C  | -0.18300300 | -0.46838600 | 2.54580700 |
| C  | -0.13620900 | 0.87569200  | 2.57537300 |
| H  | -1.11991500 | -1.01126000 | 2.55256000 |
| H  | 0.70831700  | -1.06888200 | 2.66191200 |
| H  | -1.03462500 | 1.48132200  | 2.59450200 |
| H  | 0.79876700  | 1.41033900  | 2.69741400 |
| Co | -0.04150600 | 0.08799900  | 0.21947100 |

**<sup>1/2</sup>Co(+)-TS-4/5**

| Atom | x           | y           | z           |
|------|-------------|-------------|-------------|
| C    | 1.12289400  | 2.51015400  | -0.22669300 |
| C    | 1.13500100  | 3.89238700  | -0.42432800 |
| C    | -0.06981000 | 4.57544600  | -0.53037800 |
| C    | -1.25766800 | 3.85803100  | -0.46228100 |
| C    | -1.21483300 | 2.47641700  | -0.26367500 |
| N    | -0.03838200 | 1.82819000  | -0.12668000 |
| H    | -0.08298400 | 5.64914800  | -0.67678500 |
| H    | 2.07193800  | 4.42794700  | -0.49640300 |
| H    | -2.20594600 | 4.36812900  | -0.56417900 |
| C    | 2.36793100  | 1.69493400  | -0.16588100 |
| C    | -2.44400700 | 1.63110600  | -0.23937800 |
| N    | -2.27275100 | 0.37857100  | -0.02258500 |
| N    | 2.21532900  | 0.43421000  | 0.03021900  |
| C    | -3.77002500 | 2.29327500  | -0.50633300 |
| H    | -3.98687800 | 3.04961200  | 0.25364000  |
| H    | -3.76954600 | 2.80000100  | -1.47536100 |
| H    | -4.57870800 | 1.56616000  | -0.50196200 |
| C    | 3.68760500  | 2.38966200  | -0.37210100 |
| H    | 3.72312700  | 2.88889000  | -1.34450500 |
| H    | 3.84286400  | 3.15836300  | 0.39056200  |
| H    | 4.51564700  | 1.68694200  | -0.31901800 |
| C    | -3.37018800 | -0.54344800 | -0.09368500 |
| C    | -3.64958200 | -1.15253200 | -1.33389500 |
| C    | -4.09809800 | -0.87355500 | 1.06429300  |
| C    | -4.63967900 | -2.13676900 | -1.37935100 |
| C    | -5.07923900 | -1.86437600 | 0.96660600  |
| C    | -5.34465300 | -2.50251500 | -0.23860600 |
| H    | -4.86189100 | -2.61536000 | -2.32797200 |
| H    | -5.64640000 | -2.12944800 | 1.85341500  |
| H    | -6.10608500 | -3.27284400 | -0.29160100 |
| C    | 3.33825400  | -0.45773300 | -0.03737100 |
| C    | 4.00093000  | -0.85143000 | 1.13943800  |
| C    | 3.71316100  | -0.96493400 | -1.29688800 |

|    |             |             |             |
|----|-------------|-------------|-------------|
| C  | 5.03213500  | -1.78866200 | 1.03296400  |
| C  | 4.74675100  | -1.90350700 | -1.35026000 |
| C  | 5.40068500  | -2.32060900 | -0.19694400 |
| H  | 5.55562600  | -2.09716900 | 1.93228800  |
| H  | 5.04383500  | -2.30416500 | -2.31434100 |
| H  | 6.20124000  | -3.04958500 | -0.25743200 |
| C  | 3.65059700  | -0.26219900 | 2.48355100  |
| H  | 3.71163500  | 0.83026300  | 2.48278000  |
| H  | 2.63673900  | -0.52244600 | 2.79593400  |
| H  | 4.33246000  | -0.62484100 | 3.25343900  |
| C  | 3.05226900  | -0.49271500 | -2.56990600 |
| H  | 1.96239600  | -0.48019700 | -2.49477900 |
| H  | 3.36293500  | 0.52389900  | -2.83441300 |
| H  | 3.32206500  | -1.13580300 | -3.40843200 |
| C  | -3.90239700 | -0.14035700 | 2.36915700  |
| H  | -4.31724100 | -0.70956500 | 3.20234900  |
| H  | -2.85449200 | 0.06035200  | 2.58963300  |
| H  | -4.41476900 | 0.82845900  | 2.36028900  |
| C  | -2.95078700 | -0.72524400 | -2.60279700 |
| H  | -3.33626000 | 0.23337400  | -2.96798400 |
| H  | -1.87445200 | -0.60041400 | -2.46964500 |
| H  | -3.10929200 | -1.45465000 | -3.39831400 |
| C  | 0.26822300  | -2.09504200 | 0.83350300  |
| H  | 1.34164000  | -2.23512200 | 0.95144600  |
| H  | -0.25077500 | -2.90629700 | 1.33580400  |
| C  | -0.14642700 | -2.08426700 | -0.63612300 |
| H  | 0.04498600  | -1.09893800 | -1.14749000 |
| H  | -1.21861800 | -2.25633200 | -0.72459800 |
| C  | 0.62659300  | -3.12988600 | -1.45786000 |
| H  | 1.70429800  | -2.96955400 | -1.40380200 |
| H  | 0.41690000  | -4.13304500 | -1.07965000 |
| H  | 0.32523300  | -3.10062700 | -2.50778900 |
| Co | 0.00841600  | -0.03679400 | 0.44712800  |
| C  | -0.19328200 | -0.97698200 | 2.40995600  |
| H  | 0.56814300  | -1.51863200 | 2.96184100  |
| H  | -1.18541100 | -1.37207200 | 2.59656000  |
| C  | -0.06908000 | 0.45471400  | 2.34574900  |
| H  | -0.95161600 | 1.05599200  | 2.54443700  |
| H  | 0.85141100  | 0.91002700  | 2.70001300  |

 **$^{1/2}\text{Co}(+)-5$** 

| Atom | x          | y           | z          |
|------|------------|-------------|------------|
| C    | 1.31877400 | -2.97021300 | 0.34469500 |
| C    | 1.41400700 | -4.33911400 | 0.59394100 |

|   |             |             |             |
|---|-------------|-------------|-------------|
| C | 0.23494500  | -5.07633200 | 0.71525500  |
| C | -1.00354500 | -4.44597100 | 0.58587700  |
| C | -1.02745400 | -3.07369000 | 0.33681500  |
| N | 0.11798800  | -2.38655200 | 0.22697100  |
| H | 0.28138400  | -6.14124400 | 0.91011800  |
| H | 2.37637600  | -4.82546000 | 0.69355800  |
| H | -1.92021900 | -5.01478300 | 0.67921900  |
| C | 2.43148200  | -2.00002300 | 0.17972400  |
| C | -2.22028800 | -2.20542200 | 0.16475100  |
| N | -1.96569000 | -0.95390400 | -0.06294500 |
| N | 2.06870000  | -0.77546800 | -0.04816400 |
| C | -3.58659500 | -2.81063000 | 0.26084200  |
| H | -3.69178100 | -3.62580100 | -0.46121300 |
| H | -3.74273700 | -3.24200400 | 1.25443200  |
| H | -4.36792800 | -2.07825300 | 0.07515500  |
| C | 3.84533500  | -2.48281200 | 0.28063400  |
| H | 4.03508400  | -2.90030100 | 1.27429900  |
| H | 4.02491800  | -3.28443800 | -0.44188800 |
| H | 4.55951700  | -1.68399100 | 0.09871200  |
| C | -3.03774600 | -0.00296200 | -0.21947200 |
| C | -3.56974100 | 0.61258500  | 0.92534600  |
| C | -3.47299800 | 0.31445300  | -1.51668900 |
| C | -4.56900300 | 1.57133900  | 0.74102000  |
| C | -4.47593900 | 1.27762600  | -1.64740800 |
| C | -5.02010700 | 1.90356300  | -0.53140100 |
| H | -4.99385200 | 2.06276300  | 1.61032900  |
| H | -4.83004100 | 1.53807400  | -2.63955600 |
| H | -5.79509800 | 2.65225000  | -0.65365000 |
| C | 3.05336100  | 0.26574200  | -0.20540700 |
| C | 3.46600300  | 0.61122100  | -1.50288600 |
| C | 3.51963000  | 0.93602900  | 0.93700900  |
| C | 4.37968700  | 1.65906100  | -1.63619900 |
| C | 4.42961600  | 1.97942600  | 0.75016100  |
| C | 4.85764400  | 2.34049600  | -0.52235100 |
| H | 4.71489100  | 1.94272200  | -2.62853300 |
| H | 4.80267500  | 2.51431900  | 1.61758100  |
| H | 5.56239300  | 3.15535800  | -0.64639000 |
| C | 2.95488800  | -0.12915400 | -2.71332000 |
| H | 3.27325900  | -1.17702400 | -2.71984400 |
| H | 1.86133900  | -0.12720900 | -2.75889400 |
| H | 3.32494200  | 0.32673100  | -3.63200600 |
| C | 3.07334700  | 0.54362800  | 2.32435500  |
| H | 1.98780300  | 0.43272100  | 2.39183300  |

|    |             |             |             |
|----|-------------|-------------|-------------|
| H  | 3.51420500  | -0.40747300 | 2.64307600  |
| H  | 3.37550700  | 1.29487000  | 3.05464200  |
| C  | -2.89711300 | -0.37218900 | -2.72982500 |
| H  | -1.80669100 | -0.28794100 | -2.76687600 |
| H  | -3.13605500 | -1.44088300 | -2.74886100 |
| H  | -3.29381100 | 0.06375700  | -3.64709800 |
| C  | -3.09819800 | 0.25071500  | 2.31269600  |
| H  | -3.45637800 | -0.73713400 | 2.62330600  |
| H  | -2.00742700 | 0.23456800  | 2.38576500  |
| H  | -3.46810500 | 0.96811900  | 3.04581800  |
| C  | -0.04350600 | 1.37658900  | -0.68072000 |
| H  | 0.85345500  | 1.60165500  | -1.27059700 |
| H  | -0.91359100 | 1.50101700  | -1.33749400 |
| C  | -0.14479400 | 2.34284700  | 0.50236200  |
| H  | 0.71817700  | 2.22318400  | 1.16946500  |
| H  | -1.03310100 | 2.11562200  | 1.10429000  |
| C  | -0.22017700 | 3.81891400  | 0.06881200  |
| H  | 0.67005000  | 4.06365000  | -0.52386100 |
| H  | -1.07729000 | 3.94968200  | -0.60357400 |
| Co | 0.03743900  | -0.50842600 | -0.17500500 |
| C  | -0.33855600 | 4.79795700  | 1.24203400  |
| H  | 0.51648700  | 4.66287000  | 1.91642500  |
| H  | -1.22968100 | 4.55013000  | 1.83242900  |
| C  | -0.41187700 | 6.26135400  | 0.79995600  |
| H  | -1.27577400 | 6.43931500  | 0.15217600  |
| H  | -0.49940100 | 6.93463100  | 1.65680600  |
| H  | 0.48219100  | 6.55473200  | 0.24135300  |

 **$^{1/2}\text{Co}(+)-6$** 

| Atom | x           | y          | z          |
|------|-------------|------------|------------|
| C    | 1.02223300  | 2.70052400 | 0.23778600 |
| C    | 1.00001500  | 4.08038300 | 0.44714900 |
| C    | -0.23329700 | 4.72425000 | 0.52565700 |
| C    | -1.40927100 | 3.98225900 | 0.43437000 |
| C    | -1.31861100 | 2.60531800 | 0.22382900 |
| N    | -0.12132000 | 2.01338700 | 0.08724800 |
| H    | -0.27783600 | 5.79569400 | 0.68207000 |
| H    | 1.91922800  | 4.64187800 | 0.55444900 |
| H    | -2.37164700 | 4.46796600 | 0.53296700 |
| C    | 2.22584600  | 1.83357900 | 0.23197200 |
| C    | -2.45024300 | 1.64598000 | 0.20439500 |
| N    | -2.12244500 | 0.40304400 | 0.05018300 |
| N    | 1.99696800  | 0.56768200 | 0.08354600 |
| C    | -3.84056200 | 2.16767400 | 0.42371000 |

|   |             |             |             |
|---|-------------|-------------|-------------|
| H | -3.90238500 | 2.70183300  | 1.37656900  |
| H | -4.11134200 | 2.88133700  | -0.36034000 |
| H | -4.57638300 | 1.36797700  | 0.43225400  |
| C | 3.57084700  | 2.46126600  | 0.45218200  |
| H | 3.81029300  | 3.14924400  | -0.36472400 |
| H | 3.57449100  | 3.04690800  | 1.37592200  |
| H | 4.35905200  | 1.71578100  | 0.51563900  |
| C | -3.13879300 | -0.61785900 | 0.13710800  |
| C | -3.89024700 | -0.97344900 | -0.99641400 |
| C | -3.32017300 | -1.25507200 | 1.37792800  |
| C | -4.81469800 | -2.01364700 | -0.86707500 |
| C | -4.25871600 | -2.28615500 | 1.45598400  |
| C | -4.99619100 | -2.67191200 | 0.34325600  |
| H | -5.40228100 | -2.30422100 | -1.73192800 |
| H | -4.41004400 | -2.78889100 | 2.40570900  |
| H | -5.71632600 | -3.47902900 | 0.42037700  |
| C | 3.08949400  | -0.37002900 | 0.17277300  |
| C | 3.28412700  | -1.02391400 | 1.40525200  |
| C | 3.89573600  | -0.64182500 | -0.94460500 |
| C | 4.28377900  | -1.99340400 | 1.48361600  |
| C | 4.88072400  | -1.62717400 | -0.81606300 |
| C | 5.07127800  | -2.30514000 | 0.37979600  |
| H | 4.44628000  | -2.50744700 | 2.42544800  |
| H | 5.50599600  | -1.85802500 | -1.67295900 |
| H | 5.83708400  | -3.06916100 | 0.45619500  |
| C | 2.48550000  | -0.65475000 | 2.63135600  |
| H | 2.79006100  | 0.31970800  | 3.02979500  |
| H | 1.41443200  | -0.59457800 | 2.42851300  |
| H | 2.63360700  | -1.38674700 | 3.42603800  |
| C | 3.77770400  | 0.11127900  | -2.24856500 |
| H | 2.80103700  | 0.57169200  | -2.38960400 |
| H | 4.52348300  | 0.91183300  | -2.30696600 |
| H | 3.96038800  | -0.54857100 | -3.09894900 |
| C | -2.56128100 | -0.82060800 | 2.60727700  |
| H | -1.48356200 | -0.78205300 | 2.43320100  |
| H | -2.86831200 | 0.17598900  | 2.94336400  |
| H | -2.73903800 | -1.50784800 | 3.43500900  |
| C | -3.75134400 | -0.25252500 | -2.31524000 |
| H | -4.01852000 | 0.80642700  | -2.23760900 |
| H | -2.73490900 | -0.29848200 | -2.70980500 |
| H | -4.41005100 | -0.69246000 | -3.06443500 |
| C | -0.06442800 | -1.88239800 | 0.02462800  |
| H | 0.12598200  | -1.89048700 | 1.11178100  |

|    |             |             |             |
|----|-------------|-------------|-------------|
| H  | -1.11038200 | -2.17509900 | -0.11192300 |
| C  | 0.84282800  | -2.90969200 | -0.64757500 |
| H  | 1.88874700  | -2.59192300 | -0.62336100 |
| H  | 0.57649900  | -3.00939200 | -1.70586800 |
| C  | 0.73767300  | -4.29831700 | 0.00384400  |
| H  | 1.05266600  | -4.27010100 | 1.05124200  |
| H  | -0.28979500 | -4.67325100 | -0.02136400 |
| H  | 1.37022800  | -5.02651800 | -0.51223600 |
| Co | -0.03826900 | 0.08540400  | -0.24097600 |
| C  | 0.07458500  | -0.45407500 | -2.55791900 |
| H  | 1.05618700  | -0.90571800 | -2.60796200 |
| H  | -0.76019700 | -1.13738000 | -2.64621600 |
| C  | -0.09168300 | 0.88149500  | -2.57914700 |
| H  | -1.07127000 | 1.33640900  | -2.66724100 |
| H  | 0.75240500  | 1.55963600  | -2.63113200 |

**<sup>1/2</sup>Co(+)-TS-6/7**

| Atom | x           | y           | z           |
|------|-------------|-------------|-------------|
| C    | 1.20486300  | 2.68357000  | 0.02198200  |
| C    | 1.25277100  | 4.07272400  | -0.09680200 |
| C    | 0.05092400  | 4.77803100  | -0.16611100 |
| C    | -1.16624100 | 4.09762300  | -0.11290200 |
| C    | -1.14869900 | 2.70791300  | 0.00606800  |
| N    | 0.02083500  | 2.04973100  | 0.06774500  |
| H    | 0.06267700  | 5.85752000  | -0.26013900 |
| H    | 2.19961800  | 4.59700800  | -0.13552100 |
| H    | -2.10139600 | 4.64141100  | -0.16327500 |
| C    | 2.33776300  | 1.74310900  | 0.13482300  |
| C    | -2.30261600 | 1.79088900  | 0.10459600  |
| N    | -1.99352100 | 0.52718800  | 0.10768500  |
| N    | 2.00128200  | 0.48633100  | 0.13375000  |
| C    | -3.68419200 | 2.35980300  | 0.22924500  |
| H    | -3.73943400 | 3.04404000  | 1.08100100  |
| H    | -3.94086200 | 2.94002600  | -0.66273800 |
| H    | -4.43418900 | 1.58415200  | 0.36000900  |
| C    | 3.73129400  | 2.27818100  | 0.27095000  |
| H    | 4.03690700  | 2.78378100  | -0.65082900 |
| H    | 3.78124400  | 3.01851700  | 1.07402600  |
| H    | 4.44993200  | 1.48966600  | 0.48023800  |
| C    | -3.02423700 | -0.46035200 | 0.33009600  |
| C    | -3.80028700 | -0.94315300 | -0.73732300 |
| C    | -3.19438300 | -0.93342900 | 1.64428100  |
| C    | -4.75167800 | -1.92930100 | -0.45872800 |
| C    | -4.15752500 | -1.91892900 | 1.87066000  |



|    |             |             |             |
|----|-------------|-------------|-------------|
| C  | -4.92981100 | -2.41936000 | 0.82931400  |
| H  | -5.36316200 | -2.31177400 | -1.26962200 |
| H  | -4.30169800 | -2.29290600 | 2.87913700  |
| H  | -5.67319200 | -3.18511700 | 1.02193700  |
| C  | 3.00338600  | -0.53015900 | 0.35396900  |
| C  | 3.12833500  | -1.04666700 | 1.65947400  |
| C  | 3.79967900  | -0.99822600 | -0.70413100 |
| C  | 4.04459700  | -2.07663300 | 1.87506600  |
| C  | 4.69940500  | -2.03631100 | -0.43750100 |
| C  | 4.81886800  | -2.57939100 | 0.83438100  |
| H  | 4.15293700  | -2.48467900 | 2.87476900  |
| H  | 5.31796400  | -2.41348900 | -1.24595000 |
| H  | 5.52056900  | -3.38546000 | 1.01875700  |
| C  | 2.34239900  | -0.47542400 | 2.81428800  |
| H  | 2.65252400  | 0.54890400  | 3.04661500  |
| H  | 1.26881300  | -0.44102600 | 2.61138100  |
| H  | 2.49069000  | -1.07072100 | 3.71578800  |
| C  | 3.76511300  | -0.38870200 | -2.08462000 |
| H  | 2.80457100  | 0.06371300  | -2.32162900 |
| H  | 4.52799300  | 0.39134000  | -2.18677600 |
| H  | 3.98284500  | -1.13889400 | -2.84722500 |
| C  | -2.38007500 | -0.38650800 | 2.79031800  |
| H  | -1.30556600 | -0.47488300 | 2.60494600  |
| H  | -2.58561900 | 0.67341000  | 2.97199100  |
| H  | -2.60176500 | -0.92267500 | 3.71355100  |
| C  | -3.64232900 | -0.43272200 | -2.14838900 |
| H  | -3.72292100 | 0.65600800  | -2.21310700 |
| H  | -2.67382900 | -0.70712500 | -2.57099700 |
| H  | -4.41322200 | -0.85151700 | -2.79598800 |
| C  | -0.02744000 | -1.92058400 | 0.16935100  |
| H  | 0.70941300  | -1.98693300 | 0.97290000  |
| H  | -1.03009000 | -2.14377900 | 0.53405800  |
| C  | 0.34620500  | -2.74170300 | -0.96521800 |
| H  | 1.40709700  | -2.98758100 | -1.03681700 |
| H  | 0.33233100  | -1.90969100 | -2.02761200 |
| C  | -0.57339200 | -3.83764400 | -1.45574300 |
| H  | -0.53483100 | -4.68359600 | -0.76034800 |
| H  | -1.61248400 | -3.50087200 | -1.49533300 |
| H  | -0.28605500 | -4.21236700 | -2.44153300 |
| Co | 0.00330000  | 0.14877100  | -0.08520300 |
| C  | 0.21501600  | -1.00623300 | -2.93755700 |
| H  | 1.15246900  | -1.18444400 | -3.46281900 |
| H  | -0.63292300 | -1.44096000 | -3.46767400 |

|   |             |            |             |
|---|-------------|------------|-------------|
| C | 0.02800200  | 0.26328300 | -2.29230700 |
| H | -0.94344000 | 0.72589500 | -2.44020900 |
| H | 0.84254600  | 0.97337100 | -2.41790400 |

 **$1/2\text{Co}(+)-7$** 

| Atom | x           | y           | z           |
|------|-------------|-------------|-------------|
| C    | 1.25675700  | 2.61087800  | 0.09216200  |
| C    | 1.30335100  | 4.00122100  | 0.02239600  |
| C    | 0.10857700  | 4.72290900  | 0.02568300  |
| C    | -1.11107400 | 4.04561200  | 0.07668600  |
| C    | -1.11203800 | 2.65460200  | 0.14430500  |
| N    | 0.06142400  | 1.97234400  | 0.18636900  |
| H    | 0.12731600  | 5.80466200  | -0.02774500 |
| H    | 2.25410900  | 4.51677600  | -0.03740400 |
| H    | -2.04423500 | 4.59533700  | 0.05855900  |
| C    | 2.37363000  | 1.67538700  | 0.08852100  |
| C    | -2.26175900 | 1.76021200  | 0.17803800  |
| N    | -1.95961000 | 0.48844500  | 0.07553700  |
| N    | 2.02171800  | 0.41430600  | 0.01386500  |
| C    | -3.64706300 | 2.31478400  | 0.33374200  |
| H    | -3.70587300 | 2.97633100  | 1.20198200  |
| H    | -3.91823800 | 2.91049800  | -0.54375200 |
| H    | -4.38935800 | 1.52887000  | 0.44781500  |
| C    | 3.78302200  | 2.17913600  | 0.18887000  |
| H    | 4.01164700  | 2.83506200  | -0.65664300 |
| H    | 3.92131400  | 2.76945600  | 1.09913500  |
| H    | 4.50626400  | 1.36753800  | 0.19208800  |
| C    | -2.99532500 | -0.50191200 | 0.26189700  |
| C    | -3.73654600 | -0.98937900 | -0.82643400 |
| C    | -3.23028300 | -0.96134400 | 1.57643700  |
| C    | -4.67044200 | -2.00481300 | -0.58505500 |
| C    | -4.17102400 | -1.97415200 | 1.76522600  |
| C    | -4.87885700 | -2.50656600 | 0.69144500  |
| H    | -5.24748800 | -2.39305000 | -1.41884200 |
| H    | -4.35706900 | -2.34121000 | 2.76950300  |
| H    | -5.60372300 | -3.29641300 | 0.85563800  |
| C    | 3.02204200  | -0.61187000 | 0.20396900  |
| C    | 3.31337500  | -1.00792600 | 1.52746900  |
| C    | 3.66830900  | -1.20415100 | -0.89505800 |
| C    | 4.21224900  | -2.05830400 | 1.72088900  |
| C    | 4.56290900  | -2.25153600 | -0.64815300 |
| C    | 4.82533900  | -2.68782500 | 0.64306300  |
| H    | 4.43796400  | -2.37915300 | 2.73285200  |
| H    | 5.06657600  | -2.71844200 | -1.48900400 |

|    |             |             |             |
|----|-------------|-------------|-------------|
| H  | 5.51726800  | -3.50562500 | 0.81226200  |
| C  | 2.73655000  | -0.29363500 | 2.72851600  |
| H  | 3.31110300  | 0.60976500  | 2.96166700  |
| H  | 1.70164300  | 0.02368700  | 2.58626200  |
| H  | 2.77532700  | -0.93001400 | 3.61379300  |
| C  | 3.50625700  | -0.70026900 | -2.30857000 |
| H  | 2.62017700  | -0.08568900 | -2.43931700 |
| H  | 4.37117000  | -0.09221100 | -2.59542900 |
| H  | 3.45581100  | -1.52681000 | -3.02084300 |
| C  | -2.54279900 | -0.34306100 | 2.77122000  |
| H  | -1.47632400 | -0.17425100 | 2.60869800  |
| H  | -2.97996100 | 0.63049100  | 3.01872400  |
| H  | -2.65344600 | -0.97552700 | 3.65303900  |
| C  | -3.63278500 | -0.41561800 | -2.21878700 |
| H  | -4.53078500 | 0.16467700  | -2.45550000 |
| H  | -2.77630900 | 0.24131900  | -2.34447800 |
| H  | -3.56595200 | -1.20635500 | -2.96964900 |
| C  | -0.00394500 | -2.02400900 | 0.84550300  |
| H  | 0.82394600  | -1.67945500 | 1.45213300  |
| H  | -0.96943800 | -2.11742800 | 1.32715100  |
| C  | 0.21814000  | -2.60362100 | -0.35107500 |
| H  | 1.22881100  | -2.58713300 | -0.75244100 |
| H  | 0.73842600  | -1.30465700 | -3.00175900 |
| C  | -0.78891500 | -3.41560200 | -1.10042800 |
| H  | -0.55183400 | -4.47616800 | -0.95019200 |
| H  | -1.80622200 | -3.24866400 | -0.74486100 |
| H  | -0.74765500 | -3.24277100 | -2.17612200 |
| Co | 0.01978500  | 0.14505600  | -0.15219600 |
| C  | -0.08896200 | -0.60043700 | -3.11206000 |
| H  | -0.05618000 | -0.24171900 | -4.15041400 |
| H  | -1.01848700 | -1.15968200 | -3.00476400 |
| C  | -0.00470300 | 0.56872900  | -2.14787400 |
| H  | -0.85463200 | 1.24408300  | -2.27583900 |
| H  | 0.90149900  | 1.15706600  | -2.31266400 |

**<sup>1/2</sup>Co(+)-8**

| Atom | x           | y          | z           |
|------|-------------|------------|-------------|
| C    | 1.17463100  | 2.55914400 | 0.00898100  |
| C    | 1.21214300  | 3.95406400 | -0.00041500 |
| C    | -0.00000400 | 4.64649200 | -0.00732300 |
| C    | -1.21215100 | 3.95406300 | -0.00041100 |
| C    | -1.17463800 | 2.55914300 | 0.00898400  |
| N    | -0.00000300 | 1.92143100 | 0.00831800  |
| H    | -0.00000400 | 5.73029100 | -0.01550700 |

|   |             |             |             |
|---|-------------|-------------|-------------|
| H | 2.15183800  | 4.49203600  | -0.00196600 |
| H | -2.15184600 | 4.49203500  | -0.00196000 |
| C | 2.32348200  | 1.61060100  | 0.02786800  |
| C | -2.32348800 | 1.61059900  | 0.02787200  |
| N | -1.99788400 | 0.35537500  | 0.04955600  |
| N | 1.99787900  | 0.35537700  | 0.04953800  |
| C | -3.71749700 | 2.15628600  | 0.03154900  |
| H | -3.86055000 | 2.82337900  | 0.88721500  |
| H | -3.89694900 | 2.75107000  | -0.86958300 |
| H | -4.46263500 | 1.36653000  | 0.07949200  |
| C | 3.71749100  | 2.15629000  | 0.03156400  |
| H | 3.89695300  | 2.75107500  | -0.86956400 |
| H | 3.86053300  | 2.82338100  | 0.88723400  |
| H | 4.46262900  | 1.36653400  | 0.07951500  |
| C | -3.02311900 | -0.65927600 | 0.05427400  |
| C | -3.57136400 | -1.08145800 | -1.16738400 |
| C | -3.39696200 | -1.22650300 | 1.28340000  |
| C | -4.52492700 | -2.10210300 | -1.13184000 |
| C | -4.35900600 | -2.23838700 | 1.26645200  |
| C | -4.91887700 | -2.67615900 | 0.07119000  |
| H | -4.95961400 | -2.44893700 | -2.06376000 |
| H | -4.66604300 | -2.68943200 | 2.20443700  |
| H | -5.65938400 | -3.46836300 | 0.07715500  |
| C | 3.02311700  | -0.65927400 | 0.05427100  |
| C | 3.39694100  | -1.22649600 | 1.28340500  |
| C | 3.57138200  | -1.08145500 | -1.16737700 |
| C | 4.35898700  | -2.23837900 | 1.26647400  |
| C | 4.52494800  | -2.10209800 | -1.13181500 |
| C | 4.91887800  | -2.67615200 | 0.07122200  |
| H | 4.66601100  | -2.68942200 | 2.20446500  |
| H | 4.95965100  | -2.44893200 | -2.06372700 |
| H | 5.65938700  | -3.46835500 | 0.07720100  |
| C | 2.79332100  | -0.75355700 | 2.58199900  |
| H | 3.05222600  | 0.28724700  | 2.80329200  |
| H | 1.70055600  | -0.81634800 | 2.56568200  |
| H | 3.14535300  | -1.35908300 | 3.41757800  |
| C | 3.16792300  | -0.45567000 | -2.48069300 |
| H | 2.08438900  | -0.34185400 | -2.56975600 |
| H | 3.60878600  | 0.53859900  | -2.61411300 |
| H | 3.50426100  | -1.06678300 | -3.31883200 |
| C | -2.79335900 | -0.75356700 | 2.58200400  |
| H | -1.70059500 | -0.81636700 | 2.56570300  |
| H | -3.05225900 | 0.28723900  | 2.80329200  |

|    |             |             |             |
|----|-------------|-------------|-------------|
| H  | -3.14541100 | -1.35908900 | 3.41757700  |
| C  | -3.16788200 | -0.45567200 | -2.48069400 |
| H  | -3.60873700 | 0.53860000  | -2.61411800 |
| H  | -2.08434600 | -0.34186400 | -2.56974200 |
| H  | -3.50421200 | -1.06678100 | -3.31883900 |
| C  | -0.00000200 | -1.97595500 | 0.14097800  |
| H  | 0.88313600  | -2.30470100 | 0.70050300  |
| H  | -0.88316600 | -2.30470600 | 0.70046000  |
| C  | 0.00003400  | -2.63083000 | -1.24470300 |
| H  | 0.88428000  | -2.36505000 | -1.83235200 |
| H  | -0.88418400 | -2.36505700 | -1.83239700 |
| Co | -0.00000200 | -0.01885300 | 0.06009900  |
| H  | 0.00003600  | -3.72529100 | -1.16814500 |

 **$1/2\text{Co}(+)\text{-TS-3/9}$** 

| Atom | x           | y           | z           |
|------|-------------|-------------|-------------|
| C    | -1.13248200 | 2.56200100  | -0.08462200 |
| C    | -1.15020700 | 3.95339300  | -0.17765000 |
| C    | 0.05892100  | 4.64495000  | -0.17813000 |
| C    | 1.25769200  | 3.93728100  | -0.12887200 |
| C    | 1.21823000  | 2.54623500  | -0.03860100 |
| N    | 0.03612700  | 1.90012200  | 0.04024100  |
| H    | 0.06746900  | 5.72645700  | -0.24496900 |
| H    | -2.08744400 | 4.48906800  | -0.25608400 |
| H    | 2.20447000  | 4.46035600  | -0.16940700 |
| C    | -2.30389900 | 1.66883100  | -0.16481500 |
| C    | 2.38024900  | 1.63769800  | -0.07646200 |
| N    | 2.07402900  | 0.37916800  | -0.13944400 |
| N    | -2.01868800 | 0.40246500  | -0.17945700 |
| C    | 3.76762500  | 2.20821200  | -0.09046300 |
| H    | 3.87149000  | 2.94053600  | -0.89596600 |
| H    | 3.98500200  | 2.72820900  | 0.84749800  |
| H    | 4.51738700  | 1.43436000  | -0.23685400 |
| C    | -3.67586900 | 2.26418600  | -0.28229800 |
| H    | -3.94714900 | 2.80565500  | 0.62892700  |
| H    | -3.70748900 | 2.98378000  | -1.10512400 |
| H    | -4.42972600 | 1.50293500  | -0.46728500 |
| C    | 3.09078200  | -0.63031300 | -0.17856800 |
| C    | 3.81140800  | -0.96950400 | 0.98215100  |
| C    | 3.28540600  | -1.30950700 | -1.39839100 |
| C    | 4.73467100  | -2.01670300 | 0.89340700  |
| C    | 4.22795900  | -2.33700300 | -1.43714400 |
| C    | 4.94606600  | -2.69443900 | -0.30014700 |
| H    | 5.29475400  | -2.29867100 | 1.77949700  |

|    |             |             |             |
|----|-------------|-------------|-------------|
| H  | 4.39871400  | -2.86203800 | -2.37142100 |
| H  | 5.66852100  | -3.50196100 | -0.34551400 |
| C  | -3.05624400 | -0.58485200 | -0.24453800 |
| C  | -3.17431500 | -1.32625600 | -1.43752500 |
| C  | -3.87859400 | -0.83841800 | 0.86988500  |
| C  | -4.13973500 | -2.33117400 | -1.49627000 |
| C  | -4.82066400 | -1.86726100 | 0.76464200  |
| C  | -4.95515700 | -2.60716300 | -0.40285500 |
| H  | -4.25148900 | -2.90322700 | -2.41163900 |
| H  | -5.45726100 | -2.08455600 | 1.61660700  |
| H  | -5.69428100 | -3.39854500 | -0.46230800 |
| C  | -2.31213300 | -1.01756400 | -2.63534700 |
| H  | -2.51026000 | -0.01709200 | -3.03270300 |
| H  | -1.24603800 | -1.05355700 | -2.38951800 |
| H  | -2.49272800 | -1.73125900 | -3.43988000 |
| C  | -3.78705900 | -0.04379600 | 2.15166000  |
| H  | -2.78252200 | 0.33651400  | 2.34165900  |
| H  | -4.46701300 | 0.81482800  | 2.13778300  |
| H  | -4.07740100 | -0.65709200 | 3.00628700  |
| C  | 2.53310200  | -0.90923400 | -2.64305200 |
| H  | 1.45312900  | -0.86223100 | -2.47326600 |
| H  | 2.83700500  | 0.07997200  | -3.00073900 |
| H  | 2.71405400  | -1.61765700 | -3.45219000 |
| C  | 3.63673900  | -0.24189700 | 2.29516400  |
| H  | 4.34355100  | 0.59005900  | 2.38714300  |
| H  | 2.63387900  | 0.16851000  | 2.42299800  |
| H  | 3.83357500  | -0.91081400 | 3.13486900  |
| C  | 0.02870000  | -2.03638600 | 0.13522600  |
| H  | -0.93318800 | -2.41073500 | -0.20168900 |
| H  | 0.88431600  | -2.28718100 | -0.48348100 |
| C  | 0.21873900  | -1.77822300 | 1.48949000  |
| H  | 0.08540800  | 0.05767800  | 1.69604000  |
| H  | 1.24299900  | -1.73291400 | 1.84448000  |
| C  | -0.79780900 | -2.11501900 | 2.54786500  |
| H  | -1.81665100 | -2.07761000 | 2.16430000  |
| H  | -0.61024700 | -3.14352900 | 2.87764700  |
| H  | -0.72092900 | -1.47081200 | 3.42483300  |
| Co | 0.01789200  | 0.01932700  | 0.17324600  |

**<sup>1/2</sup>Co(+)-9**

| Atom | x           | y          | z           |
|------|-------------|------------|-------------|
| C    | 1.13729400  | 2.58467300 | 0.01901900  |
| C    | 1.14811400  | 3.97732000 | 0.01433400  |
| C    | -0.06424900 | 4.66610900 | -0.01998400 |

|   |             |             |             |
|---|-------------|-------------|-------------|
| C | -1.26447600 | 3.95558000  | -0.02928200 |
| C | -1.22869100 | 2.56354700  | -0.02267200 |
| N | -0.03886700 | 1.91278500  | -0.02884400 |
| H | -0.07391100 | 5.74938800  | -0.02456100 |
| H | 2.08552400  | 4.51854700  | 0.04166400  |
| H | -2.21205800 | 4.47962800  | -0.03575900 |
| C | 2.28313500  | 1.68586200  | 0.08853800  |
| C | -2.36014900 | 1.64484700  | 0.01175400  |
| N | -2.01697200 | 0.38395900  | 0.06995400  |
| N | 1.96410400  | 0.41680800  | 0.11505100  |
| C | -3.76500400 | 2.16860200  | -0.00850000 |
| H | -3.91292100 | 2.90392100  | 0.78708000  |
| H | -3.97484100 | 2.67363500  | -0.95659000 |
| H | -4.49475700 | 1.37338700  | 0.12227500  |
| C | 3.67544900  | 2.24050300  | 0.14184300  |
| H | 3.75716200  | 2.99235900  | 0.93123700  |
| H | 4.41374000  | 1.46519300  | 0.33093900  |
| H | 3.93248400  | 2.73434000  | -0.80056500 |
| C | -3.03592900 | -0.63145300 | 0.12085800  |
| C | -3.64299100 | -1.07811500 | -1.06791100 |
| C | -3.37508000 | -1.16952900 | 1.37699000  |
| C | -4.58362300 | -2.10822800 | -0.97349600 |
| C | -4.32479900 | -2.19269500 | 1.41800500  |
| C | -4.92033000 | -2.66610000 | 0.25395600  |
| H | -5.05860300 | -2.47113800 | -1.87942900 |
| H | -4.60106200 | -2.61806700 | 2.37741700  |
| H | -5.65112300 | -3.46580700 | 0.30461000  |
| C | 3.00842400  | -0.57138800 | 0.17635200  |
| C | 3.28800700  | -1.16445700 | 1.42265100  |
| C | 3.70782800  | -0.92863300 | -0.99029800 |
| C | 4.27239000  | -2.15344500 | 1.47339000  |
| C | 4.68211000  | -1.92670800 | -0.88758900 |
| C | 4.96102700  | -2.53935800 | 0.32797800  |
| H | 4.50385700  | -2.61967700 | 2.42560700  |
| H | 5.22823100  | -2.22153600 | -1.77808700 |
| H | 5.71949600  | -3.31244200 | 0.38508800  |
| C | 2.59249300  | -0.71254200 | 2.68338500  |
| H | 2.89980800  | 0.29845100  | 2.97084700  |
| H | 1.50493000  | -0.68861800 | 2.57383900  |
| H | 2.83131800  | -1.37302400 | 3.51771200  |
| C | 3.45692200  | -0.25501200 | -2.31824500 |
| H | 2.41053100  | 0.02095400  | -2.45510600 |
| H | 4.05206600  | 0.65947800  | -2.41749700 |

|    |             |             |             |
|----|-------------|-------------|-------------|
| H  | 3.74567000  | -0.90781700 | -3.14345000 |
| C  | -2.78907400 | -0.62241800 | 2.65643400  |
| H  | -1.70717100 | -0.47881900 | 2.59761600  |
| H  | -3.21960800 | 0.35328500  | 2.90637800  |
| H  | -2.99476700 | -1.28893100 | 3.49484600  |
| C  | -3.33526600 | -0.45783200 | -2.41040300 |
| H  | -3.93649100 | 0.44291900  | -2.57743600 |
| H  | -2.28810200 | -0.16674500 | -2.50887500 |
| H  | -3.57386900 | -1.14928400 | -3.22002300 |
| C  | -0.00104300 | -2.03866500 | 0.40455000  |
| H  | 0.97707900  | -2.29219100 | 0.79726100  |
| H  | -0.82703900 | -2.04421700 | 1.10628700  |
| C  | -0.24125500 | -2.09522900 | -0.93826200 |
| H  | -0.01399600 | 0.14495100  | -1.61173300 |
| H  | -1.27169300 | -2.02695800 | -1.26846100 |
| C  | 0.72828100  | -2.57349500 | -1.97457500 |
| H  | 1.75795000  | -2.57453600 | -1.62087300 |
| H  | 0.46326000  | -3.60838700 | -2.22391200 |
| H  | 0.66189800  | -1.99839600 | -2.89912400 |
| Co | -0.02029400 | 0.07003100  | -0.11241800 |

**<sup>1/2</sup>Co(+)-10**

| Atom | x           | y          | z           |
|------|-------------|------------|-------------|
| C    | -1.12754200 | 2.71011000 | 0.09644000  |
| C    | -1.14602300 | 4.10175800 | 0.19352300  |
| C    | 0.07822700  | 4.77169200 | 0.26099400  |
| C    | 1.28392500  | 4.06642600 | 0.23234100  |
| C    | 1.22848400  | 2.67565400 | 0.13475800  |
| N    | 0.04207100  | 2.06627700 | 0.07207100  |
| H    | 0.09278100  | 5.85283500 | 0.33670000  |
| H    | -2.07718300 | 4.65398600 | 0.21654800  |
| H    | 2.22931400  | 4.59173900 | 0.28558800  |
| C    | -2.27815200 | 1.76043100 | 0.01002500  |
| C    | 2.35333200  | 1.69310000 | 0.08639800  |
| N    | 1.98501000  | 0.45247300 | -0.00322700 |
| N    | -1.94273100 | 0.51027800 | -0.07343600 |
| C    | 3.76316400  | 2.18946200 | 0.13431900  |
| H    | 3.94299400  | 2.89708400 | -0.68104700 |
| H    | 3.94700200  | 2.72754200 | 1.06969700  |
| H    | 4.48092400  | 1.37699700 | 0.05446100  |
| C    | -3.67476800 | 2.29457000 | 0.02478500  |
| H    | -3.82495300 | 2.98958800 | -0.80737000 |
| H    | -4.41186300 | 1.49906400 | -0.04935600 |
| H    | -3.85743400 | 2.85624200 | 0.94638900  |



|    |             |             |             |
|----|-------------|-------------|-------------|
| C  | 2.95910300  | -0.61205900 | -0.04652400 |
| C  | 3.47376400  | -1.11444500 | 1.15839600  |
| C  | 3.30317600  | -1.14799500 | -1.29676200 |
| C  | 4.38615200  | -2.16927600 | 1.08172700  |
| C  | 4.22419900  | -2.19688300 | -1.32092200 |
| C  | 4.76566900  | -2.70316700 | -0.14451300 |
| H  | 4.79646300  | -2.57829000 | 1.99930900  |
| H  | 4.51083800  | -2.62446600 | -2.27617900 |
| H  | 5.47564200  | -3.52197500 | -0.18270800 |
| C  | -2.94677800 | -0.52425400 | -0.16082900 |
| C  | -3.34942700 | -0.96302300 | -1.43085600 |
| C  | -3.43194100 | -1.09482100 | 1.02532600  |
| C  | -4.29567500 | -1.98825300 | -1.49148600 |
| C  | -4.37570200 | -2.11798700 | 0.91204600  |
| C  | -4.80957900 | -2.55974500 | -0.33284300 |
| H  | -4.62523100 | -2.34427900 | -2.46215900 |
| H  | -4.76706400 | -2.57589600 | 1.81465500  |
| H  | -5.54164700 | -3.35693400 | -0.40015900 |
| C  | -2.76757700 | -0.36866600 | -2.68866500 |
| H  | -2.98577100 | 0.69968600  | -2.78875800 |
| H  | -1.67815400 | -0.48055700 | -2.71272800 |
| H  | -3.16755000 | -0.86426500 | -3.57356100 |
| C  | -2.93642200 | -0.64403400 | 2.37664900  |
| H  | -1.85138400 | -0.76597100 | 2.46328400  |
| H  | -3.16137600 | 0.40853200  | 2.57759800  |
| H  | -3.39597700 | -1.22952000 | 3.17328100  |
| C  | 2.68637900  | -0.62626700 | -2.56931400 |
| H  | 1.59646100  | -0.73873400 | -2.55145400 |
| H  | 2.90124800  | 0.43406100  | -2.73695100 |
| H  | 3.05855500  | -1.17389300 | -3.43552100 |
| C  | 3.04393900  | -0.56241400 | 2.49531200  |
| H  | 3.38994400  | 0.46411100  | 2.65710900  |
| H  | 1.95416200  | -0.55737800 | 2.59718100  |
| H  | 3.44593300  | -1.16619000 | 3.30922600  |
| H  | -0.00505100 | -1.35241800 | -0.17743100 |
| Co | 0.01580500  | 0.15182700  | -0.06767300 |

$^{3/2}\text{Co}(+)$  $^{3/2}\text{Co}(+)-1$ 

| Atom | x           | y           | z           |
|------|-------------|-------------|-------------|
| C    | 1.16931800  | 2.44969700  | -0.11223100 |
| C    | 1.20663400  | 3.83274800  | -0.29869000 |
| C    | 0.00000100  | 4.52487500  | -0.37661800 |
| C    | -1.20663300 | 3.83274800  | -0.29868700 |
| C    | -1.16931600 | 2.44969700  | -0.11222900 |
| N    | 0.00000100  | 1.81281500  | 0.01430300  |
| H    | 0.00000100  | 5.59953900  | -0.51870300 |
| H    | 2.14723800  | 4.36012300  | -0.38996600 |
| H    | -2.14723700 | 4.36012300  | -0.38996100 |
| C    | 2.36487900  | 1.54917100  | -0.09690600 |
| C    | -2.36487800 | 1.54917200  | -0.09689900 |
| N    | -2.09945600 | 0.29100800  | -0.07713700 |
| N    | 2.09945600  | 0.29100800  | -0.07713500 |
| C    | -3.73296600 | 2.16030800  | -0.16208100 |
| H    | -3.90817100 | 2.81747300  | 0.69487000  |
| H    | -3.83301100 | 2.77336400  | -1.06290500 |
| H    | -4.50808300 | 1.39810800  | -0.18108300 |
| C    | 3.73296700  | 2.16030600  | -0.16210500 |
| H    | 3.83300100  | 2.77336000  | -1.06293200 |
| H    | 3.90818300  | 2.81747200  | 0.69484200  |
| H    | 4.50808300  | 1.39810500  | -0.18111600 |
| C    | -3.12725000 | -0.71108000 | -0.07047700 |
| C    | -3.33903800 | -1.43423700 | -1.25702900 |
| C    | -3.81734300 | -1.00460500 | 1.11886500  |
| C    | -4.29924600 | -2.44669900 | -1.24293300 |
| C    | -4.75977400 | -2.03545100 | 1.08399000  |
| C    | -5.00680100 | -2.74712100 | -0.08412600 |
| H    | -4.48660000 | -3.00889800 | -2.15201900 |
| H    | -5.30040000 | -2.28420800 | 1.99143100  |
| H    | -5.74321300 | -3.54311500 | -0.08864000 |
| C    | 3.12724800  | -0.71108200 | -0.07048100 |
| C    | 3.81736000  | -1.00459700 | 1.11885300  |
| C    | 3.33901400  | -1.43425200 | -1.25702900 |
| C    | 4.75978800  | -2.03544500 | 1.08397300  |
| C    | 4.29922000  | -2.44671600 | -1.24293800 |
| C    | 5.00679400  | -2.74712800 | -0.08414000 |
| H    | 5.30042800  | -2.28419500 | 1.99140700  |
| H    | 4.48655800  | -3.00892500 | -2.15202200 |
| H    | 5.74320400  | -3.54312400 | -0.08865800 |
| C    | 3.54635600  | -0.26268600 | 2.40545600  |

|    |             |             |             |
|----|-------------|-------------|-------------|
| H  | 3.92451100  | 0.76485700  | 2.38400700  |
| H  | 2.47701300  | -0.21159100 | 2.63006900  |
| H  | 4.03148500  | -0.76100600 | 3.24512200  |
| C  | 2.56456700  | -1.11868400 | -2.51202900 |
| H  | 1.48362900  | -1.17414400 | -2.34438600 |
| H  | 2.77665000  | -0.11245800 | -2.88767000 |
| H  | 2.81007200  | -1.82217800 | -3.30806500 |
| C  | -3.54631600 | -0.26270700 | 2.40547000  |
| H  | -2.47697000 | -0.21162500 | 2.63007200  |
| H  | -3.92446100 | 0.76484000  | 2.38403300  |
| H  | -4.03144100 | -0.76102800 | 3.24513900  |
| C  | -2.56461100 | -1.11865700 | -2.51203900 |
| H  | -2.77670300 | -0.11242900 | -2.88766900 |
| H  | -1.48367000 | -1.17411400 | -2.34441300 |
| H  | -2.81012600 | -1.82214600 | -3.30807600 |
| Co | 0.00000300  | -0.25067100 | 0.40159600  |
| C  | 0.00000900  | -2.08618400 | 1.13530400  |
| H  | 0.00005400  | -2.79489200 | 0.29672400  |
| H  | 0.88532400  | -2.30064800 | 1.74192900  |
| H  | -0.88534000 | -2.30068200 | 1.74186600  |

 **$^{3/2}\text{Co}(+)-2$** 

| Atom | x           | y          | z           |
|------|-------------|------------|-------------|
| C    | 1.16488100  | 2.40490200 | -0.36195900 |
| C    | 1.20222900  | 3.78313200 | -0.58877000 |
| C    | 0.00003100  | 4.47749000 | -0.68197000 |
| C    | -1.20218800 | 3.78324600 | -0.58822600 |
| C    | -1.16488100 | 2.40499800 | -0.36149100 |
| N    | -0.00000800 | 1.76260000 | -0.21369100 |
| H    | 0.00004700  | 5.54838000 | -0.84988100 |
| H    | 2.14403000  | 4.30463000 | -0.69763200 |
| H    | -2.14399200 | 4.30483300 | -0.69662500 |
| C    | 2.37747400  | 1.52898500 | -0.33132300 |
| C    | -2.37754200 | 1.52914700 | -0.33057200 |
| N    | -2.15543000 | 0.28104100 | -0.13306400 |
| N    | 2.15538700  | 0.28093000 | -0.13329000 |
| C    | -3.71978300 | 2.15126800 | -0.59110300 |
| H    | -3.96493500 | 2.88774600 | 0.18008000  |
| H    | -3.72000800 | 2.67755400 | -1.54996500 |
| H    | -4.50658700 | 1.40111300 | -0.61284600 |
| C    | 3.71965000  | 2.15089500 | -0.59263500 |
| H    | 3.71939000  | 2.67718100 | -1.55149200 |
| H    | 3.96536100  | 2.88734600 | 0.17839900  |
| H    | 4.50634300  | 1.40063500 | -0.61481200 |

|   |             |             |             |
|---|-------------|-------------|-------------|
| C | -3.21620300 | -0.68848900 | -0.13952600 |
| C | -3.36466900 | -1.48536100 | -1.28941900 |
| C | -4.02453200 | -0.86752100 | 0.99718400  |
| C | -4.34927000 | -2.47418300 | -1.27991200 |
| C | -4.98822600 | -1.87923700 | 0.96081700  |
| C | -5.15293100 | -2.67799700 | -0.16386800 |
| H | -4.48117000 | -3.09368200 | -2.16104500 |
| H | -5.61730400 | -2.03670100 | 1.83103900  |
| H | -5.90605900 | -3.45817200 | -0.17075900 |
| C | 3.21610600  | -0.68870600 | -0.13969300 |
| C | 4.02484400  | -0.86719700 | 0.99681600  |
| C | 3.36407300  | -1.48618100 | -1.28922900 |
| C | 4.98839400  | -1.87905900 | 0.96063900  |
| C | 4.34855600  | -2.47512400 | -1.27954100 |
| C | 5.15257400  | -2.67845500 | -0.16367100 |
| H | 5.61779400  | -2.03611800 | 1.83070100  |
| H | 4.48008500  | -3.09508700 | -2.16040100 |
| H | 5.90559300  | -3.45873600 | -0.17041300 |
| C | 3.89240300  | -0.00024100 | 2.22584200  |
| H | 4.28141600  | 1.01043200  | 2.06159300  |
| H | 2.85572700  | 0.10455200  | 2.55181700  |
| H | 4.45532400  | -0.42361800 | 3.05823100  |
| C | 2.50928400  | -1.26508000 | -2.51157300 |
| H | 1.44392400  | -1.33160100 | -2.27494300 |
| H | 2.68000900  | -0.28048900 | -2.95967900 |
| H | 2.72553500  | -2.01158500 | -3.27641800 |
| C | -3.89144900 | -0.00126800 | 2.22663500  |
| H | -2.85461300 | 0.10315000  | 2.55222600  |
| H | -4.28033900 | 1.00957200  | 2.06309600  |
| H | -4.45410700 | -0.42499700 | 3.05902300  |
| C | -2.51024800 | -1.26372500 | -2.51191900 |
| H | -2.68164200 | -0.27921300 | -2.95995900 |
| H | -1.44480800 | -1.32958700 | -2.27547600 |
| H | -2.72620100 | -2.01032600 | -3.27675600 |
| C | -0.00154800 | -2.34604100 | 0.18630500  |
| H | -0.00226200 | -2.70930300 | -0.84781500 |
| H | 0.88217000  | -2.77367700 | 0.67210100  |
| H | -0.88604000 | -2.77161600 | 0.67251300  |
| C | 0.00080900  | -0.59834100 | 2.77985500  |
| H | 0.91782600  | -1.17242400 | 2.84633200  |
| H | -0.91603000 | -1.17259100 | 2.84716100  |
| C | 0.00067000  | 0.74106700  | 2.73549300  |
| H | -0.91961500 | 1.31439800  | 2.75165000  |

|    |            |             |            |
|----|------------|-------------|------------|
| H  | 0.92087800 | 1.31455000  | 2.75067100 |
| Co | 0.00050200 | -0.34615200 | 0.27116600 |

**<sup>3/2</sup>Co(+)-TS-2/3**

| Atom | x           | y           | z           |
|------|-------------|-------------|-------------|
| C    | 1.16915700  | 2.47857100  | 0.00930000  |
| C    | 1.19915300  | 3.87447100  | 0.02595800  |
| C    | -0.00297100 | 4.57353700  | 0.06166900  |
| C    | -1.20409300 | 3.87101300  | 0.09295900  |
| C    | -1.16972100 | 2.47631800  | 0.07222200  |
| N    | 0.00014600  | 1.81483800  | 0.02306800  |
| H    | -0.00420000 | 5.65739700  | 0.07137000  |
| H    | 2.13980900  | 4.40886600  | 0.01209300  |
| H    | -2.14557800 | 4.40264900  | 0.13293300  |
| C    | 2.39497300  | 1.62508000  | 0.01008900  |
| C    | -2.39189800 | 1.61806900  | 0.12305500  |
| N    | -2.19499100 | 0.35165100  | 0.03533500  |
| N    | 2.19878300  | 0.35807000  | -0.06117400 |
| C    | -3.72976800 | 2.28186800  | 0.28824000  |
| H    | -3.74116500 | 2.91862500  | 1.17716400  |
| H    | -3.95362900 | 2.92166900  | -0.57081200 |
| H    | -4.52557700 | 1.54661900  | 0.38098300  |
| C    | 3.73573100  | 2.29742600  | 0.11474600  |
| H    | 3.89599300  | 2.97354700  | -0.73031700 |
| H    | 3.80307300  | 2.89820700  | 1.02625200  |
| H    | 4.54229000  | 1.56807900  | 0.12380800  |
| C    | -3.28299100 | -0.58577900 | 0.09357400  |
| C    | -3.98105700 | -0.91890400 | -1.08162000 |
| C    | -3.57570500 | -1.19827800 | 1.32767800  |
| C    | -4.94529000 | -1.92861100 | -1.00621600 |
| C    | -4.55021100 | -2.19800600 | 1.34965400  |
| C    | -5.22280000 | -2.57367000 | 0.19220800  |
| H    | -5.48787300 | -2.20350500 | -1.90542400 |
| H    | -4.78599300 | -2.68163300 | 2.29236700  |
| H    | -5.96999000 | -3.35884700 | 0.22739800  |
| C    | 3.29153200  | -0.56991600 | 0.01629000  |
| C    | 3.71991000  | -1.00800300 | 1.28344700  |
| C    | 3.86075900  | -1.06539100 | -1.17065100 |
| C    | 4.71275700  | -1.99019700 | 1.33615700  |
| C    | 4.85338200  | -2.04240500 | -1.06392700 |
| C    | 5.27221300  | -2.51171200 | 0.17599100  |
| H    | 5.05056500  | -2.34429100 | 2.30497200  |
| H    | 5.30491100  | -2.43405200 | -1.96991900 |
| H    | 6.03896200  | -3.27612900 | 0.23759900  |

|    |             |             |             |
|----|-------------|-------------|-------------|
| C  | 3.17172800  | -0.41304300 | 2.55877700  |
| H  | 3.61715200  | 0.56640500  | 2.76690300  |
| H  | 2.08953000  | -0.27113800 | 2.52306800  |
| H  | 3.39819400  | -1.05184600 | 3.41346800  |
| C  | 3.46622500  | -0.52431200 | -2.52304600 |
| H  | 2.38435200  | -0.48830600 | -2.65845800 |
| H  | 3.84032600  | 0.49461800  | -2.67307400 |
| H  | 3.88222000  | -1.13761600 | -3.32334000 |
| C  | -2.93168300 | -0.74482200 | 2.61660100  |
| H  | -1.88688100 | -0.45748900 | 2.49148900  |
| H  | -3.45386500 | 0.12561700  | 3.03016200  |
| H  | -2.97637200 | -1.52970700 | 3.37329200  |
| C  | -3.77675800 | -0.18351200 | -2.38604400 |
| H  | -4.48556700 | 0.64709700  | -2.47950800 |
| H  | -2.77607500 | 0.23546000  | -2.49050600 |
| H  | -3.95269000 | -0.84239100 | -3.23832100 |
| C  | -0.21978200 | -1.24780900 | -2.04986000 |
| H  | 0.09839400  | -0.21798100 | -2.30047100 |
| H  | 0.39748100  | -1.91438400 | -2.64348600 |
| H  | -1.26717800 | -1.37405100 | -2.30311000 |
| C  | 0.07624500  | -2.53039600 | -0.37830000 |
| H  | 0.96828400  | -2.94049400 | -0.83320800 |
| H  | -0.84128600 | -3.02837000 | -0.66713600 |
| C  | 0.19553500  | -2.00954600 | 0.93391000  |
| H  | -0.66257900 | -2.09167300 | 1.59267800  |
| H  | 1.16635300  | -2.05535900 | 1.41111900  |
| Co | -0.01986700 | -0.23888000 | -0.14517800 |

 **$^{3/2}\text{Co}(+)-3$** 

| Atom | x           | y          | z           |
|------|-------------|------------|-------------|
| C    | -1.17002500 | 2.70667100 | 0.00355600  |
| C    | -1.20720600 | 4.09756100 | 0.11815200  |
| C    | 0.00000000  | 4.79248000 | 0.15885100  |
| C    | 1.20720600  | 4.09756100 | 0.11815200  |
| C    | 1.17002500  | 2.70667100 | 0.00355600  |
| N    | 0.00000000  | 2.06587300 | -0.09461600 |
| H    | 0.00000000  | 5.87303100 | 0.24535200  |
| H    | -2.14732600 | 4.62964700 | 0.18384600  |
| H    | 2.14732500  | 4.62964700 | 0.18384600  |
| C    | -2.36165000 | 1.80377800 | 0.04307000  |
| C    | 2.36165000  | 1.80377800 | 0.04307000  |
| N    | 2.09363800  | 0.54582400 | 0.10675600  |
| N    | -2.09363800 | 0.54582400 | 0.10675600  |
| C    | 3.73143100  | 2.41477800 | 0.06624300  |

|   |             |             |             |
|---|-------------|-------------|-------------|
| H | 3.91005300  | 3.00741800  | -0.83588000 |
| H | 3.83097900  | 3.09162800  | 0.92013900  |
| H | 4.50534300  | 1.65504900  | 0.14302000  |
| C | -3.73143100 | 2.41477800  | 0.06624300  |
| H | -3.83097900 | 3.09162800  | 0.92013900  |
| H | -3.91005400 | 3.00741800  | -0.83588000 |
| H | -4.50534300 | 1.65504900  | 0.14302000  |
| C | 3.12279100  | -0.45302200 | 0.16286400  |
| C | 3.32276900  | -1.10926400 | 1.39064500  |
| C | 3.82965500  | -0.80982500 | -0.99948900 |
| C | 4.28307500  | -2.12021300 | 1.44399100  |
| C | 4.77045800  | -1.83809500 | -0.89648100 |
| C | 5.00307700  | -2.48493800 | 0.31136500  |
| H | 4.46142300  | -2.62957900 | 2.38545400  |
| H | 5.32282100  | -2.13516200 | -1.78210900 |
| H | 5.73904300  | -3.27934600 | 0.36827300  |
| C | -3.12279100 | -0.45302200 | 0.16286400  |
| C | -3.82965500 | -0.80982500 | -0.99948900 |
| C | -3.32276900 | -1.10926400 | 1.39064500  |
| C | -4.77045800 | -1.83809500 | -0.89648100 |
| C | -4.28307500 | -2.12021300 | 1.44399100  |
| C | -5.00307700 | -2.48493800 | 0.31136500  |
| H | -5.32282100 | -2.13516200 | -1.78210900 |
| H | -4.46142300 | -2.62958000 | 2.38545400  |
| H | -5.73904300 | -3.27934600 | 0.36827300  |
| C | -3.58883400 | -0.13207100 | -2.32703300 |
| H | -4.03308900 | 0.86816700  | -2.36905700 |
| H | -2.52363600 | -0.02490100 | -2.54799300 |
| H | -4.03345800 | -0.70925600 | -3.13827100 |
| C | -2.53971000 | -0.72048600 | 2.61960900  |
| H | -1.45975500 | -0.77901300 | 2.44773700  |
| H | -2.75463000 | 0.30434200  | 2.93893100  |
| H | -2.77587800 | -1.37913200 | 3.45586100  |
| C | 3.58883300  | -0.13207100 | -2.32703300 |
| H | 2.52363600  | -0.02490100 | -2.54799300 |
| H | 4.03308800  | 0.86816700  | -2.36905700 |
| H | 4.03345700  | -0.70925500 | -3.13827100 |
| C | 2.53971000  | -0.72048500 | 2.61960900  |
| H | 2.75463000  | 0.30434200  | 2.93893000  |
| H | 1.45975600  | -0.77901300 | 2.44773700  |
| H | 2.77587800  | -1.37913200 | 3.45586100  |
| C | 0.00000000  | -1.80170000 | -1.22287900 |
| H | -0.87813900 | -1.88695700 | -1.87727500 |

|    |             |             |             |
|----|-------------|-------------|-------------|
| H  | 0.87813900  | -1.88695700 | -1.87727500 |
| C  | 0.00000000  | -2.94115100 | -0.19226000 |
| H  | -0.87760400 | -2.85873300 | 0.46134000  |
| H  | 0.87760400  | -2.85873300 | 0.46134000  |
| C  | 0.00000000  | -4.33782200 | -0.83227000 |
| H  | -0.88273800 | -4.48103600 | -1.46225800 |
| H  | 0.88273800  | -4.48103600 | -1.46225800 |
| H  | 0.00000000  | -5.12637900 | -0.07359800 |
| Co | 0.00000000  | -0.00610700 | -0.38126400 |

 **$^{3/2}\text{Co}(+)-4$** 

| Atom | x           | y           | z           |
|------|-------------|-------------|-------------|
| N    | -0.11856100 | 2.00248500  | -0.13863500 |
| C    | -1.30709700 | 2.60968200  | -0.24096300 |
| C    | -2.49053300 | 1.69407600  | -0.25435100 |
| N    | -2.23092700 | 0.44539900  | -0.12506700 |
| C    | -3.26497400 | -0.54817200 | -0.20239100 |
| C    | -3.40516300 | -1.25135000 | -1.41269400 |
| C    | -2.57592000 | -0.90039100 | -2.62244700 |
| H    | -2.72882000 | -1.62573600 | -3.42223300 |
| C    | -4.36038600 | -2.26685200 | -1.47534100 |
| C    | -5.14539200 | -2.58431300 | -0.37270800 |
| C    | -4.99181500 | -1.87425200 | 0.81171500  |
| C    | -4.05654300 | -0.84154700 | 0.92202700  |
| C    | -3.93758000 | -0.06801300 | 2.21303900  |
| H    | -2.90187600 | 0.03506900  | 2.54297000  |
| H    | -5.60775500 | -2.11932300 | 1.67107100  |
| H    | -4.48429200 | -2.81610100 | -2.40308300 |
| C    | -3.85242100 | 2.28871200  | -0.48057900 |
| H    | -4.11375500 | 2.98203300  | 0.32452600  |
| H    | -3.87513800 | 2.85725500  | -1.41474300 |
| H    | -4.61681300 | 1.51719500  | -0.53167800 |
| C    | -1.39650100 | 3.99612500  | -0.39175100 |
| C    | -0.22248400 | 4.73951500  | -0.45929400 |
| C    | 1.00459900  | 4.08560900  | -0.41790400 |
| C    | 1.01910200  | 2.69670100  | -0.26454000 |
| C    | 2.26427100  | 1.86988100  | -0.29797900 |
| N    | 2.10233800  | 0.60642200  | -0.13809300 |
| C    | 3.21023900  | -0.30662200 | -0.22602100 |
| C    | 3.37593400  | -1.02015300 | -1.42691600 |
| C    | 4.40689900  | -1.95850900 | -1.49455200 |
| C    | 5.24063100  | -2.19022000 | -0.40618300 |
| C    | 5.05994900  | -1.47053200 | 0.76848700  |
| C    | 4.04834400  | -0.51312800 | 0.88344100  |



|    |             |             |             |
|----|-------------|-------------|-------------|
| H  | 5.71320900  | -1.64924900 | 1.61647100  |
| H  | 4.55202200  | -2.51542700 | -2.41454600 |
| C  | 3.57208100  | 2.55533600  | -0.57520700 |
| H  | 3.81395200  | 3.26721000  | 0.21983000  |
| H  | 4.38605200  | 1.83895200  | -0.65378700 |
| H  | 3.51971600  | 3.12227900  | -1.50896700 |
| H  | 1.92575600  | 4.64576500  | -0.50950000 |
| H  | -0.26393100 | 5.81726000  | -0.56767100 |
| H  | -2.35784900 | 4.48760300  | -0.46278300 |
| H  | 6.03070500  | -2.92988600 | -0.47405600 |
| C  | 3.89668900  | 0.27417900  | 2.16254900  |
| H  | 4.23679000  | 1.30943100  | 2.05012200  |
| H  | -5.87567500 | -3.38342700 | -0.43652000 |
| C  | 2.48855600  | -0.76617900 | -2.61976500 |
| H  | 2.71916900  | -1.45936000 | -3.42927800 |
| C  | -0.10936300 | -2.12568300 | 0.04030600  |
| H  | -1.13151800 | -2.41415000 | 0.32199600  |
| H  | -0.06287200 | -2.26958100 | -1.05141600 |
| H  | -1.50803300 | -0.88023700 | -2.39040200 |
| H  | -2.83620900 | 0.08525300  | -3.02355300 |
| H  | -4.48771800 | -0.56510900 | 3.01262200  |
| H  | -4.34857600 | 0.94377700  | 2.12612800  |
| H  | 4.49150200  | -0.16911500 | 2.96170700  |
| H  | 2.86138100  | 0.31371500  | 2.50740200  |
| H  | 2.61235500  | 0.24782700  | -3.01460000 |
| H  | 1.43084600  | -0.88735300 | -2.37069700 |
| C  | 0.71784200  | -4.54127700 | 0.27947700  |
| C  | 0.89248100  | -3.07720600 | 0.70739800  |
| H  | 1.43469400  | -5.19646300 | 0.78412600  |
| H  | 0.86525100  | -4.65754300 | -0.79870500 |
| H  | -0.28752800 | -4.90457300 | 0.51326400  |
| H  | 1.92037500  | -2.76788700 | 0.48895800  |
| H  | 0.79034000  | -3.02580800 | 1.79853200  |
| C  | -0.00090800 | -0.42298600 | 2.75124700  |
| C  | -0.06594600 | 0.91639000  | 2.74223100  |
| H  | -0.88753300 | -1.04372100 | 2.81091800  |
| H  | 0.94434200  | -0.95021700 | 2.81225500  |
| H  | -1.01289000 | 1.44385300  | 2.77146800  |
| H  | 0.82675100  | 1.53125800  | 2.77196800  |
| Co | -0.00162600 | -0.13290900 | 0.28675800  |

**<sup>3/2</sup>Co(+)-TS-4/5**

| Atom | x          | y          | z           |
|------|------------|------------|-------------|
| C    | 1.14469600 | 2.59804800 | -0.32304700 |

|   |             |             |             |
|---|-------------|-------------|-------------|
| C | 1.16230400  | 3.98254400  | -0.50016500 |
| C | -0.04728700 | 4.66795900  | -0.56539800 |
| C | -1.24175600 | 3.95709900  | -0.47841500 |
| C | -1.19445000 | 2.57335300  | -0.30332600 |
| N | -0.01747200 | 1.93008600  | -0.20882100 |
| H | -0.05990800 | 5.74373500  | -0.69525200 |
| H | 2.09805700  | 4.51895300  | -0.58896300 |
| H | -2.18887700 | 4.47546800  | -0.55134400 |
| C | 2.35824900  | 1.74394500  | -0.27662100 |
| C | -2.39389400 | 1.69650000  | -0.24491500 |
| N | -2.18305600 | 0.44799700  | 0.00394400  |
| N | 2.16730200  | 0.49661500  | -0.00087300 |
| C | -3.74097700 | 2.31619800  | -0.49563700 |
| H | -3.95898100 | 3.07686900  | 0.26020400  |
| H | -3.76679800 | 2.81443200  | -1.46862400 |
| H | -4.53467600 | 1.57404000  | -0.46727500 |
| C | 3.69227400  | 2.37420400  | -0.56304800 |
| H | 3.69191300  | 2.86345900  | -1.54090400 |
| H | 3.91893500  | 3.14424600  | 0.18078000  |
| H | 4.49375200  | 1.64003600  | -0.54417800 |
| C | -3.27772600 | -0.48853400 | -0.03853100 |
| C | -3.60221500 | -1.07446000 | -1.27807600 |
| C | -3.97508500 | -0.82216000 | 1.13657300  |
| C | -4.60019500 | -2.05128800 | -1.30607000 |
| C | -4.97068300 | -1.80027700 | 1.05387200  |
| C | -5.27439800 | -2.42407200 | -0.14957700 |
| H | -4.85478500 | -2.51570300 | -2.25345600 |
| H | -5.52006400 | -2.06553200 | 1.95156900  |
| H | -6.04677700 | -3.18421900 | -0.18952200 |
| C | 3.26736700  | -0.43297900 | -0.03938800 |
| C | 3.97270600  | -0.74078000 | 1.13761100  |
| C | 3.57460100  | -1.05125700 | -1.26678600 |
| C | 4.97733800  | -1.71027500 | 1.06625000  |
| C | 4.58159100  | -2.01907800 | -1.28371900 |
| C | 5.27561400  | -2.35527000 | -0.12743700 |
| H | 5.53452400  | -1.95517000 | 1.96488400  |
| H | 4.82728000  | -2.50611900 | -2.22200000 |
| H | 6.05534400  | -3.10824400 | -0.15942900 |
| C | 3.69007200  | -0.05294000 | 2.45126700  |
| H | 3.56258300  | 1.02671900  | 2.34092400  |
| H | 2.78325000  | -0.43717000 | 2.92618300  |
| H | 4.51014200  | -0.21438600 | 3.15191100  |
| C | 2.87632200  | -0.66557500 | -2.54861600 |

|    |             |             |             |
|----|-------------|-------------|-------------|
| H  | 1.78978200  | -0.63949800 | -2.44219300 |
| H  | 3.18512400  | 0.32643900  | -2.89614000 |
| H  | 3.11491100  | -1.37020200 | -3.34596100 |
| C  | -3.71616400 | -0.13590600 | 2.45645900  |
| H  | -2.81146400 | -0.50384500 | 2.94620200  |
| H  | -3.60648800 | 0.94620100  | 2.34961200  |
| H  | -4.54367400 | -0.31116400 | 3.14499200  |
| C  | -2.94016900 | -0.63775000 | -2.56299200 |
| H  | -3.32617100 | 0.32940800  | -2.90434600 |
| H  | -1.85871900 | -0.53119700 | -2.46360100 |
| H  | -3.13358300 | -1.35526400 | -3.36141400 |
| C  | 0.34093000  | -2.23301500 | 0.59368800  |
| H  | 1.43084900  | -2.25301200 | 0.59530900  |
| H  | -0.01487600 | -3.06054800 | 1.20320200  |
| C  | -0.24163100 | -2.37456500 | -0.81280200 |
| H  | 0.02682300  | -1.52838700 | -1.46189100 |
| H  | -1.33182400 | -2.39540200 | -0.76493700 |
| C  | 0.25985700  | -3.66284800 | -1.49349500 |
| H  | 1.34846500  | -3.66586500 | -1.58797500 |
| H  | -0.02754900 | -4.54411300 | -0.91435200 |
| H  | -0.16819300 | -3.76639500 | -2.49482200 |
| Co | 0.03097300  | 0.04125700  | 0.50541800  |
| C  | -0.06243200 | -1.13734200 | 2.41002500  |
| H  | 0.79056600  | -1.69353300 | 2.78053200  |
| H  | -1.00205100 | -1.65125400 | 2.57097700  |
| C  | -0.04494500 | 0.28544400  | 2.53545800  |
| H  | -0.96562300 | 0.81099000  | 2.76261700  |
| H  | 0.85561300  | 0.77886800  | 2.88377300  |

**<sup>3/2</sup>Co(+)-5**

| Atom | x           | y           | z           |
|------|-------------|-------------|-------------|
| C    | 1.17023100  | -3.08644800 | -0.02332000 |
| C    | 1.20733500  | -4.47837500 | 0.07772300  |
| C    | -0.00000200 | -5.17357400 | 0.11139900  |
| C    | -1.20733900 | -4.47837400 | 0.07772300  |
| C    | -1.17023400 | -3.08644700 | -0.02332000 |
| N    | -0.00000100 | -2.44510600 | -0.11613500 |
| H    | -0.00000300 | -6.25491400 | 0.18740600  |
| H    | 2.14736300  | -5.01121000 | 0.13859400  |
| H    | -2.14736800 | -5.01120800 | 0.13859400  |
| C    | 2.36122400  | -2.18342300 | 0.02644800  |
| C    | -2.36122600 | -2.18342100 | 0.02644800  |
| N    | -2.09257400 | -0.92622700 | 0.10586400  |
| N    | 2.09257300  | -0.92622900 | 0.10586400  |

|   |             |             |             |
|---|-------------|-------------|-------------|
| C | -3.73138300 | -2.79390400 | 0.04153500  |
| H | -3.91045500 | -3.37438100 | -0.86837600 |
| H | -3.83125300 | -3.48199800 | 0.88634700  |
| H | -4.50490600 | -2.03488100 | 0.12858100  |
| C | 3.73138100  | -2.79390700 | 0.04153600  |
| H | 3.83125000  | -3.48200100 | 0.88634700  |
| H | 3.91045200  | -3.37438400 | -0.86837600 |
| H | 4.50490400  | -2.03488500 | 0.12858100  |
| C | -3.12109900 | 0.07242200  | 0.17314300  |
| C | -3.31834400 | 0.71690400  | 1.40766800  |
| C | -3.82993900 | 0.44122900  | -0.98432700 |
| C | -4.27770700 | 1.72802600  | 1.47275800  |
| C | -4.76956500 | 1.46936500  | -0.86948300 |
| C | -4.99945900 | 2.10451000  | 0.34504800  |
| H | -4.45412300 | 2.22797300  | 2.41962500  |
| H | -5.32333900 | 1.77550300  | -1.75114200 |
| H | -5.73485500 | 2.89875500  | 0.41114300  |
| C | 3.12109900  | 0.07242000  | 0.17314300  |
| C | 3.82993900  | 0.44122600  | -0.98432700 |
| C | 3.31834400  | 0.71690100  | 1.40766800  |
| C | 4.76956600  | 1.46936100  | -0.86948300 |
| C | 4.27770800  | 1.72802200  | 1.47275800  |
| C | 4.99946000  | 2.10450600  | 0.34504800  |
| H | 5.32334000  | 1.77549900  | -1.75114200 |
| H | 4.45412500  | 2.22797000  | 2.41962500  |
| H | 5.73485800  | 2.89875000  | 0.41114300  |
| C | 3.59293900  | -0.22370300 | -2.31904100 |
| H | 4.04477500  | -1.22001800 | -2.37216800 |
| H | 2.52850200  | -0.33647500 | -2.54048300 |
| H | 4.03274800  | 0.36558300  | -3.12420300 |
| C | 2.53335900  | 0.31551800  | 2.63130700  |
| H | 1.45373000  | 0.37637000  | 2.45837900  |
| H | 2.74736900  | -0.71274100 | 2.93997900  |
| H | 2.76857000  | 0.96521200  | 3.47480400  |
| C | -3.59293900 | -0.22370000 | -2.31904100 |
| H | -2.52850200 | -0.33647400 | -2.54048300 |
| H | -4.04477700 | -1.22001500 | -2.37216800 |
| H | -4.03274700 | 0.36558700  | -3.12420300 |
| C | -2.53335900 | 0.31552100  | 2.63130700  |
| H | -2.74737000 | -0.71273800 | 2.93997900  |
| H | -1.45373000 | 0.37637100  | 2.45837900  |
| H | -2.76856900 | 0.96521400  | 3.47480400  |
| C | 0.00000000  | 1.42257900  | -1.21893200 |

|    |             |             |             |
|----|-------------|-------------|-------------|
| H  | 0.87859800  | 1.51112400  | -1.87174500 |
| H  | -0.87859800 | 1.51112500  | -1.87174400 |
| C  | 0.00000200  | 2.54964100  | -0.17556800 |
| H  | 0.87824000  | 2.46088200  | 0.47775100  |
| H  | -0.87823600 | 2.46088300  | 0.47775200  |
| C  | 0.00000200  | 3.95972200  | -0.79328000 |
| H  | 0.87638400  | 4.06306100  | -1.44562700 |
| H  | -0.87638000 | 4.06306200  | -1.44562700 |
| Co | 0.00000000  | -0.37255100 | -0.37935100 |
| C  | 0.00000300  | 5.08613800  | 0.24577600  |
| H  | 0.87600400  | 4.97786900  | 0.89766900  |
| H  | -0.87599700 | 4.97787000  | 0.89766900  |
| C  | 0.00000400  | 6.48338400  | -0.37887000 |
| H  | -0.88199800 | 6.63925900  | -1.00763400 |
| H  | 0.00000400  | 7.26424000  | 0.38628400  |
| H  | 0.88200500  | 6.63925800  | -1.00763500 |

 **$^{3/2}\text{Co}(+)-6$** 

| Atom | x           | y           | z           |
|------|-------------|-------------|-------------|
| C    | 1.30679500  | 2.60941600  | 0.23650000  |
| C    | 1.39691600  | 3.99601500  | 0.38610200  |
| C    | 0.22315700  | 4.73970000  | 0.45383300  |
| C    | -1.00415500 | 4.08611500  | 0.41223800  |
| C    | -1.01933500 | 2.69718200  | 0.26027500  |
| N    | 0.11821200  | 2.00235400  | 0.13568200  |
| H    | 0.26479500  | 5.81745500  | 0.56195800  |
| H    | 2.35861200  | 4.48686300  | 0.45614800  |
| H    | -1.92502800 | 4.64689200  | 0.50315400  |
| C    | 2.49031300  | 1.69390200  | 0.24864000  |
| C    | -2.26498400 | 1.87109600  | 0.29326600  |
| N    | -2.10274000 | 0.60711500  | 0.13870300  |
| N    | 2.23169800  | 0.44512000  | 0.11734000  |
| C    | -3.57348000 | 2.55839600  | 0.56263000  |
| H    | -3.52562600 | 3.12624600  | 1.49609500  |
| H    | -3.80955500 | 3.26965700  | -0.23464200 |
| H    | -4.38906900 | 1.84341500  | 0.63755000  |
| C    | 3.85187600  | 2.28974300  | 0.47360800  |
| H    | 4.11183800  | 2.98215900  | -0.33275800 |
| H    | 3.87436400  | 2.85998000  | 1.40670100  |
| H    | 4.61720400  | 1.51926900  | 0.52514300  |
| C    | -3.21024100 | -0.30622000 | 0.22730000  |
| C    | -4.04696200 | -0.51656400 | -0.88226000 |
| C    | -3.37713200 | -1.01662400 | 1.43021100  |
| C    | -5.05612600 | -1.47678900 | -0.76680600 |

|    |             |             |             |
|----|-------------|-------------|-------------|
| C  | -4.40601200 | -1.95698400 | 1.49857000  |
| C  | -5.23677700 | -2.19428300 | 0.40898500  |
| H  | -5.70738600 | -1.65921300 | -1.61559600 |
| H  | -4.55224700 | -2.51105900 | 2.42010600  |
| H  | -6.02426000 | -2.93667400 | 0.47704200  |
| C  | 3.26848500  | -0.54631200 | 0.19673000  |
| C  | 3.42110200  | -1.23677800 | 1.41280700  |
| C  | 4.05087300  | -0.84910800 | -0.93125500 |
| C  | 4.37953100  | -2.24930300 | 1.47709300  |
| C  | 4.99087300  | -1.87720600 | -0.81862700 |
| C  | 5.15652900  | -2.57518600 | 0.37131300  |
| H  | 4.51253700  | -2.78932300 | 2.40897200  |
| H  | 5.60044200  | -2.12851500 | -1.68069400 |
| H  | 5.89007300  | -3.37112900 | 0.43706600  |
| C  | 2.59884500  | -0.87952100 | 2.62550400  |
| H  | 2.83691400  | 0.12157400  | 3.00103700  |
| H  | 1.52769400  | -0.89443200 | 2.40797100  |
| H  | 2.78178200  | -1.58213800 | 3.43910600  |
| C  | 3.91545900  | -0.09033800 | -2.22917600 |
| H  | 2.87756200  | -0.01673400 | -2.56024300 |
| H  | 4.30086000  | 0.93211900  | -2.15131800 |
| H  | 4.47813600  | -0.58124800 | -3.02378900 |
| C  | -2.49673400 | -0.75318400 | 2.62619700  |
| H  | -1.43625600 | -0.85185300 | 2.37987700  |
| H  | -2.64152500 | 0.25616800  | 3.02608300  |
| H  | -2.71616600 | -1.45488900 | 3.43147700  |
| C  | -3.90159500 | 0.27155000  | -2.16161800 |
| H  | -4.30609900 | 1.28520500  | -2.06473500 |
| H  | -2.86084000 | 0.37145100  | -2.47503800 |
| H  | -4.44543300 | -0.20897500 | -2.97559000 |
| C  | 0.10154000  | -2.12652900 | -0.02099300 |
| H  | 1.12942500  | -2.41806300 | -0.27723200 |
| H  | 0.02943800  | -2.26132200 | 1.07048600  |
| C  | -0.88555100 | -3.08231400 | -0.70399200 |
| H  | -0.75878400 | -3.03813200 | -1.79294600 |
| H  | -1.91833600 | -2.77224900 | -0.51073300 |
| C  | -0.72100400 | -4.54351900 | -0.26232500 |
| H  | 0.28893200  | -4.90906600 | -0.47167500 |
| H  | -0.89196600 | -4.65219000 | 0.81316300  |
| H  | -1.42716600 | -5.20184100 | -0.77788400 |
| Co | 0.00190600  | -0.13505200 | -0.28345300 |
| C  | -0.02277600 | -0.43318600 | -2.74231300 |
| H  | 0.85088300  | -1.07122900 | -2.80972500 |

|   |             |             |             |
|---|-------------|-------------|-------------|
| H | -0.97860900 | -0.94165700 | -2.79499100 |
| C | 0.06856200  | 0.90472600  | -2.73409300 |
| H | -0.81201700 | 1.53702600  | -2.75690700 |
| H | 1.02527900  | 1.41336600  | -2.77154800 |

**<sup>3/2</sup>Co(+)-TS-6/7**

| Atom | x           | y           | z           |
|------|-------------|-------------|-------------|
| C    | 1.27119600  | 2.64747100  | -0.03841100 |
| C    | 1.34898800  | 4.04069500  | -0.11154400 |
| C    | 0.16542100  | 4.77210400  | -0.16179500 |
| C    | -1.05783600 | 4.11058500  | -0.09691300 |
| C    | -1.05978800 | 2.71512300  | -0.02457200 |
| N    | 0.08656100  | 2.02711500  | -0.04498400 |
| H    | 0.19646600  | 5.85374100  | -0.22583600 |
| H    | 2.30510100  | 4.54783400  | -0.12161700 |
| H    | -1.98324000 | 4.67184600  | -0.09517000 |
| C    | 2.44605400  | 1.73801400  | 0.12666200  |
| C    | -2.28376200 | 1.87596500  | 0.15547600  |
| N    | -2.07517400 | 0.61241900  | 0.26208700  |
| N    | 2.16361800  | 0.48930300  | 0.24016400  |
| C    | -3.61466800 | 2.56245200  | 0.27180100  |
| H    | -3.59163000 | 3.30665100  | 1.07303200  |
| H    | -3.86243000 | 3.09339600  | -0.65225200 |
| H    | -4.41094500 | 1.85396800  | 0.48715200  |
| C    | 3.81723600  | 2.34320300  | 0.21951800  |
| H    | 4.08725200  | 2.84283600  | -0.71578200 |
| H    | 3.84871700  | 3.09983600  | 1.00856300  |
| H    | 4.57034600  | 1.58993400  | 0.43815100  |
| C    | -3.13627500 | -0.31966500 | 0.50937900  |
| C    | -4.01227900 | -0.71346200 | -0.51875900 |
| C    | -3.20757000 | -0.88211300 | 1.79817300  |
| C    | -4.97572500 | -1.68199400 | -0.22065100 |
| C    | -4.19388900 | -1.83690300 | 2.04841200  |
| C    | -5.07288200 | -2.23881800 | 1.04865400  |
| H    | -5.65839600 | -2.00019200 | -1.00210200 |
| H    | -4.26863800 | -2.27035800 | 3.04055300  |
| H    | -5.82917700 | -2.98745300 | 1.25752200  |
| C    | 3.16909500  | -0.50636500 | 0.47059500  |
| C    | 3.22164000  | -1.07803600 | 1.75685300  |
| C    | 4.00645800  | -0.94867800 | -0.56976900 |
| C    | 4.14848100  | -2.09416500 | 1.99006600  |
| C    | 4.90932000  | -1.97878400 | -0.28862100 |
| C    | 4.98641100  | -2.54715900 | 0.97650900  |
| H    | 4.20937100  | -2.53558700 | 2.97963700  |

|    |             |             |             |
|----|-------------|-------------|-------------|
| H  | 5.56001600  | -2.33629200 | -1.08039200 |
| H  | 5.69534400  | -3.34411800 | 1.17231000  |
| C  | 2.32404100  | -0.58631200 | 2.86418000  |
| H  | 2.54335700  | 0.45015700  | 3.14018700  |
| H  | 1.26881700  | -0.61984800 | 2.57593300  |
| H  | 2.44251000  | -1.19535100 | 3.76098400  |
| C  | 3.96064100  | -0.34934000 | -1.95467900 |
| H  | 2.93974600  | -0.16286300 | -2.29148500 |
| H  | 4.49823800  | 0.60354300  | -2.00661900 |
| H  | 4.43247200  | -1.01601800 | -2.67764500 |
| C  | -2.26341300 | -0.44651500 | 2.89002800  |
| H  | -1.21747400 | -0.54335900 | 2.58280600  |
| H  | -2.41519200 | 0.60094200  | 3.17006300  |
| H  | -2.40269100 | -1.04845500 | 3.78862300  |
| C  | -3.93930000 | -0.13131800 | -1.90977200 |
| H  | -4.33403700 | 0.88920900  | -1.95252900 |
| H  | -2.91617700 | -0.09742200 | -2.28875200 |
| H  | -4.53060700 | -0.72688400 | -2.60626500 |
| C  | -0.04346600 | -2.18167300 | -0.10685400 |
| H  | 0.80120500  | -2.35115200 | 0.56467100  |
| H  | -0.99106800 | -2.34419200 | 0.41229600  |
| C  | 0.05944100  | -2.94493000 | -1.34482500 |
| H  | 1.04100100  | -3.38932700 | -1.52718900 |
| H  | 0.09133700  | -2.09680500 | -2.30977300 |
| C  | -1.08920400 | -3.84492600 | -1.76097500 |
| H  | -1.12472600 | -4.72352500 | -1.10874100 |
| H  | -2.05044800 | -3.33258100 | -1.66535200 |
| H  | -0.98563700 | -4.20187600 | -2.78904000 |
| Co | 0.02521000  | -0.07901200 | -0.31664000 |
| C  | 0.07495200  | -1.08053200 | -3.22050400 |
| H  | 0.99555500  | -1.36402900 | -3.72745400 |
| H  | -0.81715400 | -1.42007000 | -3.74435400 |
| C  | 0.02984900  | 0.15670700  | -2.51288800 |
| H  | -0.89151100 | 0.72633400  | -2.61764300 |
| H  | 0.91360700  | 0.78522300  | -2.60672700 |

**<sup>3/2</sup>Co(+)-7**

| Atom | x           | y          | z          |
|------|-------------|------------|------------|
| C    | 1.24565000  | 2.60078600 | 0.09988700 |
| C    | 1.31178700  | 3.99570800 | 0.12563900 |
| C    | 0.12064000  | 4.71835900 | 0.14932900 |
| C    | -1.09832200 | 4.04432600 | 0.17839800 |
| C    | -1.08930500 | 2.64767000 | 0.15072700 |
| N    | 0.06409400  | 1.97587300 | 0.07903800 |



|   |             |             |             |
|---|-------------|-------------|-------------|
| H | 0.14279400  | 5.80185200  | 0.16451000  |
| H | 2.26370300  | 4.51131700  | 0.13545200  |
| H | -2.02751400 | 4.59760900  | 0.22858100  |
| C | 2.41395300  | 1.67873500  | 0.16635900  |
| C | -2.28980600 | 1.77312900  | 0.26023000  |
| N | -2.05995200 | 0.50472600  | 0.22431500  |
| N | 2.13090200  | 0.42102800  | 0.15981200  |
| C | -3.63511600 | 2.41198500  | 0.45175600  |
| H | -3.62053600 | 3.09546500  | 1.30513100  |
| H | -3.90795400 | 3.00287100  | -0.42813500 |
| H | -4.41128000 | 1.66913900  | 0.62003700  |
| C | 3.79173900  | 2.26339900  | 0.28611300  |
| H | 4.01820300  | 2.89127400  | -0.58080400 |
| H | 3.86624400  | 2.90101100  | 1.17181300  |
| H | 4.55076100  | 1.48797400  | 0.35732900  |
| C | -3.11581700 | -0.44980400 | 0.42569100  |
| C | -3.92045000 | -0.86442300 | -0.64983500 |
| C | -3.26213200 | -0.99608300 | 1.71544400  |
| C | -4.87127200 | -1.86117800 | -0.40879900 |
| C | -4.22860100 | -1.98593200 | 1.90592300  |
| C | -5.02520400 | -2.42298300 | 0.85303100  |
| H | -5.50054000 | -2.19466000 | -1.22787800 |
| H | -4.35744600 | -2.41382100 | 2.89503700  |
| H | -5.76780200 | -3.19605000 | 1.01741400  |
| C | 3.15133900  | -0.57324100 | 0.35433900  |
| C | 3.35959200  | -1.04710900 | 1.66372500  |
| C | 3.86185300  | -1.09226000 | -0.74284300 |
| C | 4.28913400  | -2.07247900 | 1.85288100  |
| C | 4.77984000  | -2.11838100 | -0.50127400 |
| C | 4.99172100  | -2.61099500 | 0.78122500  |
| H | 4.46297600  | -2.44763400 | 2.85639300  |
| H | 5.33816500  | -2.53000600 | -1.33602800 |
| H | 5.70683700  | -3.40945900 | 0.94583000  |
| C | 2.63951700  | -0.44185000 | 2.84506000  |
| H | 3.03199000  | 0.55086800  | 3.09127700  |
| H | 1.56854000  | -0.31633100 | 2.66358600  |
| H | 2.75925000  | -1.06315600 | 3.73338400  |
| C | 3.68053800  | -0.54506100 | -2.13702600 |
| H | 2.63074100  | -0.48647800 | -2.42765000 |
| H | 4.09092700  | 0.46622400  | -2.23155200 |
| H | 4.19688800  | -1.16833100 | -2.86798700 |
| C | -2.43390500 | -0.50040800 | 2.87593100  |
| H | -1.36819700 | -0.45299700 | 2.63536900  |

|    |             |             |             |
|----|-------------|-------------|-------------|
| H  | -2.73048800 | 0.50886800  | 3.18121400  |
| H  | -2.55419400 | -1.14812300 | 3.74515100  |
| C  | -3.80408000 | -0.24285000 | -2.01974000 |
| H  | -4.28188800 | 0.74252700  | -2.05530400 |
| H  | -2.76725900 | -0.10568700 | -2.32788800 |
| H  | -4.29914600 | -0.86138900 | -2.76944800 |
| C  | -0.01507200 | -2.28524400 | 0.53561800  |
| H  | 0.83309900  | -1.99866200 | 1.14804500  |
| H  | -0.98866400 | -2.33014200 | 1.01280900  |
| C  | 0.17023400  | -2.78611500 | -0.69923900 |
| H  | 1.18181400  | -2.80359100 | -1.10246700 |
| H  | 0.71877600  | -1.21191800 | -3.49314400 |
| C  | -0.88980800 | -3.43507400 | -1.53087400 |
| H  | -0.68817400 | -4.51116300 | -1.58563900 |
| H  | -1.88677000 | -3.29984200 | -1.10855200 |
| H  | -0.88214900 | -3.06849400 | -2.55871900 |
| Co | 0.00848500  | -0.02204900 | -0.47220600 |
| C  | -0.07265800 | -0.45810300 | -3.55899800 |
| H  | 0.01948500  | -0.00012700 | -4.55254100 |
| H  | -1.02519100 | -0.99553400 | -3.55484400 |
| C  | 0.00994400  | 0.58675600  | -2.44429500 |
| H  | -0.81373600 | 1.30473800  | -2.54437200 |
| H  | 0.92775800  | 1.17812300  | -2.55427800 |

**<sup>3/2</sup>Co(+)-8**

| Atom | x           | y          | z           |
|------|-------------|------------|-------------|
| C    | 1.16999400  | 2.55564700 | -0.09686800 |
| C    | 1.20722100  | 3.93892200 | -0.28239100 |
| C    | 0.00002200  | 4.63098600 | -0.35781600 |
| C    | -1.20718300 | 3.93893300 | -0.28242700 |
| C    | -1.16997800 | 2.55565400 | -0.09690500 |
| N    | 0.00000500  | 1.92087300 | 0.03429000  |
| H    | 0.00002900  | 5.70578800 | -0.49882100 |
| H    | 2.14734200  | 4.46688900 | -0.37581200 |
| H    | -2.14729700 | 4.46690800 | -0.37587700 |
| C    | 2.36123800  | 1.65136500 | -0.09281200 |
| C    | -2.36124000 | 1.65139700 | -0.09288400 |
| N    | -2.09229100 | 0.39194500 | -0.08708100 |
| N    | 2.09226600  | 0.39192000 | -0.08699500 |
| C    | -3.73101200 | 2.25913700 | -0.15847900 |
| H    | -3.91178800 | 2.91032100 | 0.70180900  |
| H    | -3.82908500 | 2.87778400 | -1.05570000 |
| H    | -4.50429600 | 1.49544000 | -0.18661500 |
| C    | 3.73102600  | 2.25907000 | -0.15837600 |

|   |             |             |             |
|---|-------------|-------------|-------------|
| H | 3.82916900  | 2.87763600  | -1.05564600 |
| H | 3.91176300  | 2.91032500  | 0.70186500  |
| H | 4.50429500  | 1.49535100  | -0.18639900 |
| C | -3.12113600 | -0.60884700 | -0.09995500 |
| C | -3.31499500 | -1.32269200 | -1.29604500 |
| C | -3.83476600 | -0.90912600 | 1.07420600  |
| C | -4.27659700 | -2.33394800 | -1.30667900 |
| C | -4.77661500 | -1.93972100 | 1.01481100  |
| C | -5.00360000 | -2.64310900 | -0.16222600 |
| H | -4.45011700 | -2.88747800 | -2.22379800 |
| H | -5.33433800 | -2.19356600 | 1.91044100  |
| H | -5.74050300 | -3.43834000 | -0.18529200 |
| C | 3.12113600  | -0.60885700 | -0.09988000 |
| C | 3.83465700  | -0.90923400 | 1.07431800  |
| C | 3.31513900  | -1.32255400 | -1.29603000 |
| C | 4.77654400  | -1.93979400 | 1.01490700  |
| C | 4.27676200  | -2.33379300 | -1.30667200 |
| C | 5.00365700  | -2.64305700 | -0.16218000 |
| H | 5.33419100  | -2.19371200 | 1.91056400  |
| H | 4.45038700  | -2.88722100 | -2.22383300 |
| H | 5.74058300  | -3.43826700 | -0.18525600 |
| C | 3.59763700  | -0.17077600 | 2.36977900  |
| H | 4.00491500  | 0.84561500  | 2.35030200  |
| H | 2.53375200  | -0.09069300 | 2.60892000  |
| H | 4.07970800  | -0.68852000 | 3.19950200  |
| C | 2.52459200  | -0.99387200 | -2.53781300 |
| H | 1.44564900  | -1.04391400 | -2.35703100 |
| H | 2.73722600  | 0.01415600  | -2.90809900 |
| H | 2.75591600  | -1.69245700 | -3.34238900 |
| C | -3.59791100 | -0.17053700 | 2.36962500  |
| H | -2.53404500 | -0.09014800 | 2.60874300  |
| H | -4.00547500 | 0.84573900  | 2.35010800  |
| H | -4.07982300 | -0.68837300 | 3.19938300  |
| C | -2.52430700 | -0.99415800 | -2.53777800 |
| H | -2.73676100 | 0.01388900  | -2.90810900 |
| H | -1.44538500 | -1.04436400 | -2.35690900 |
| H | -2.75566700 | -1.69273700 | -3.34234900 |
| C | -0.00013400 | -1.89258100 | 1.34780700  |
| H | 0.87719400  | -1.95186500 | 2.00392000  |
| H | -0.87772300 | -1.95170800 | 2.00359400  |
| C | -0.00006000 | -3.06367200 | 0.35477900  |
| H | 0.88415300  | -3.05861300 | -0.29081000 |
| H | -0.88397900 | -3.05840300 | -0.29121100 |

|    |             |             |            |
|----|-------------|-------------|------------|
| Co | -0.00000400 | -0.13265900 | 0.43452600 |
| H  | -0.00029600 | -4.03155100 | 0.87101200 |

**<sup>3/2</sup>Co(+)-TS-3/9**

| Atom | x           | y           | z           |
|------|-------------|-------------|-------------|
| C    | -1.11049100 | 2.57971800  | 0.05199100  |
| C    | -1.12612100 | 3.97258200  | 0.13135500  |
| C    | 0.08642500  | 4.65528500  | 0.18363400  |
| C    | 1.28113100  | 3.94089700  | 0.15746600  |
| C    | 1.23156400  | 2.54859600  | 0.07718400  |
| N    | 0.05202000  | 1.90725500  | 0.02292300  |
| H    | 0.09997900  | 5.73717000  | 0.24727800  |
| H    | -2.06056400 | 4.51777200  | 0.15520200  |
| H    | 2.22887900  | 4.46142200  | 0.20122100  |
| C    | -2.33198200 | 1.72661700  | -0.00081500 |
| C    | 2.43177600  | 1.66468600  | 0.04876600  |
| N    | 2.19324700  | 0.40106800  | 0.00843600  |
| N    | -2.13044700 | 0.45490300  | -0.02252800 |
| C    | 3.79534300  | 2.29368400  | 0.07571300  |
| H    | 3.92971900  | 2.96914200  | -0.77405900 |
| H    | 3.92841300  | 2.88812800  | 0.98449700  |
| H    | 4.57876200  | 1.54012600  | 0.04320800  |
| C    | -3.67679400 | 2.39505600  | -0.02056900 |
| H    | -3.82112600 | 2.99842500  | 0.88058600  |
| H    | -3.76156800 | 3.07000800  | -0.87709600 |
| H    | -4.48189400 | 1.66635200  | -0.07537000 |
| C    | 3.25496400  | -0.56388500 | -0.03983900 |
| C    | 3.73081300  | -1.11573300 | 1.16348300  |
| C    | 3.73601100  | -0.98082400 | -1.29406600 |
| C    | 4.70356400  | -2.11539400 | 1.08222700  |
| C    | 4.70642200  | -1.98578700 | -1.32085700 |
| C    | 5.18600800  | -2.55342300 | -0.14618700 |
| H    | 5.08582100  | -2.55248400 | 1.99916900  |
| H    | 5.08957800  | -2.32204100 | -2.27903100 |
| H    | 5.93719500  | -3.33448800 | -0.18760800 |
| C    | -3.22907500 | -0.46929900 | -0.07965900 |
| C    | -3.67614400 | -0.91417800 | -1.33610300 |
| C    | -3.77757600 | -0.94970800 | 1.12240000  |
| C    | -4.69170000 | -1.87363600 | -1.36556000 |
| C    | -4.79395800 | -1.90459400 | 1.03910000  |
| C    | -5.24679000 | -2.36878800 | -0.19113000 |
| H    | -5.05078000 | -2.23090500 | -2.32544800 |
| H    | -5.23144700 | -2.28835300 | 1.95522100  |
| H    | -6.03326800 | -3.11422300 | -0.23431100 |

|    |             |             |             |
|----|-------------|-------------|-------------|
| C  | -3.11277800 | -0.35290200 | -2.61912000 |
| H  | -3.46356100 | 0.66892600  | -2.80182400 |
| H  | -2.02026800 | -0.31681900 | -2.61120900 |
| H  | -3.42144300 | -0.95416800 | -3.47508600 |
| C  | -3.29895400 | -0.44779500 | 2.46238900  |
| H  | -2.20893200 | -0.47098700 | 2.54079000  |
| H  | -3.61176800 | 0.58617800  | 2.64522500  |
| H  | -3.70837700 | -1.05314200 | 3.27188600  |
| C  | 3.25937600  | -0.34435600 | -2.57780100 |
| H  | 2.17323400  | -0.22574700 | -2.60796800 |
| H  | 3.69105200  | 0.65283700  | -2.71903500 |
| H  | 3.55331200  | -0.94339600 | -3.44050300 |
| C  | 3.23733500  | -0.62919300 | 2.50414800  |
| H  | 3.61290000  | 0.37454200  | 2.73244200  |
| H  | 2.14651000  | -0.57921800 | 2.54530200  |
| H  | 3.57736800  | -1.28720600 | 3.30475100  |
| C  | 0.03886400  | -2.01922600 | -0.98169100 |
| H  | -0.91725300 | -2.18729500 | -1.46698500 |
| H  | 0.90631600  | -1.96457600 | -1.63094400 |
| C  | 0.20505800  | -2.39564700 | 0.35606400  |
| H  | 0.10466000  | -0.98140800 | 1.37920800  |
| H  | 1.22665100  | -2.54324500 | 0.69394500  |
| C  | -0.83070900 | -3.19281700 | 1.10873600  |
| H  | -1.84693500 | -2.92581600 | 0.81924900  |
| H  | -0.68308900 | -4.25018000 | 0.86213600  |
| H  | -0.73153700 | -3.08705600 | 2.18977100  |
| Co | 0.01815700  | -0.12816600 | 0.01651900  |

 **$^{3/2}\text{Co}(+)-9$** 

| Atom | x           | y          | z           |
|------|-------------|------------|-------------|
| C    | 1.12102400  | 2.61687400 | -0.04985500 |
| C    | 1.14208300  | 4.01314100 | -0.07407100 |
| C    | -0.07206300 | 4.69565400 | -0.10324500 |
| C    | -1.27026400 | 3.98453500 | -0.09476600 |
| C    | -1.21706000 | 2.58937500 | -0.06980000 |
| N    | -0.04017400 | 1.95617800 | -0.06485000 |
| H    | -0.08471100 | 5.77925900 | -0.12509300 |
| H    | 2.07598900  | 4.56028100 | -0.06834400 |
| H    | -2.21668700 | 4.50968300 | -0.10517100 |
| C    | 2.32912000  | 1.73886000 | 0.01203700  |
| C    | -2.40591100 | 1.68368000 | -0.02584600 |
| N    | -2.15291000 | 0.42241400 | 0.02690600  |
| N    | 2.10553300  | 0.47129800 | 0.05710100  |
| C    | -3.77598600 | 2.29587900 | -0.03450900 |

|   |             |             |             |
|---|-------------|-------------|-------------|
| H | -3.90402200 | 2.96921000  | 0.81811300  |
| H | -3.92367700 | 2.89204300  | -0.93994800 |
| H | -4.55243100 | 1.53580300  | 0.00792700  |
| C | 3.68384900  | 2.38444700  | 0.02973000  |
| H | 3.77600400  | 3.06407100  | 0.88198500  |
| H | 4.47837300  | 1.64487100  | 0.09218700  |
| H | 3.83627900  | 2.98090700  | -0.87475600 |
| C | -3.20713500 | -0.55169700 | 0.10710800  |
| C | -3.74786600 | -1.08221100 | -1.07841700 |
| C | -3.61113200 | -0.99802700 | 1.37802000  |
| C | -4.70818300 | -2.09067800 | -0.95987300 |
| C | -4.57347400 | -2.00884200 | 1.44157200  |
| C | -5.11712700 | -2.55576200 | 0.28507700  |
| H | -5.13935800 | -2.51300900 | -1.86187000 |
| H | -4.89889500 | -2.36630200 | 2.41331700  |
| H | -5.86053500 | -3.34234400 | 0.35366800  |
| C | 3.18505100  | -0.47419100 | 0.14372100  |
| C | 3.56160500  | -0.94090400 | 1.41580600  |
| C | 3.78033500  | -0.95461900 | -1.03586000 |
| C | 4.55615200  | -1.91940500 | 1.48626400  |
| C | 4.77041300  | -1.93348200 | -0.91109500 |
| C | 5.15570200  | -2.41663500 | 0.33442400  |
| H | 4.86264800  | -2.29067900 | 2.45896700  |
| H | 5.24334200  | -2.31846800 | -1.80888600 |
| H | 5.92415700  | -3.17836600 | 0.40760500  |
| C | 2.94293900  | -0.38154600 | 2.67405200  |
| H | 3.26747100  | 0.64742300  | 2.86348600  |
| H | 1.85028100  | -0.36303500 | 2.62686300  |
| H | 3.22884200  | -0.97325700 | 3.54439500  |
| C | 3.38787500  | -0.42741000 | -2.39415800 |
| H | 2.30361500  | -0.38180500 | -2.51901800 |
| H | 3.77416200  | 0.58443100  | -2.56184100 |
| H | 3.79522600  | -1.05777700 | -3.18554600 |
| C | -3.06461500 | -0.38243500 | 2.64396300  |
| H | -1.97971200 | -0.25059000 | 2.61256700  |
| H | -3.49567400 | 0.60750300  | 2.83042400  |
| H | -3.30037500 | -1.00119400 | 3.51059200  |
| C | -3.33310200 | -0.57184400 | -2.43674400 |
| H | -3.73531600 | 0.42885500  | -2.63152000 |
| H | -2.24722000 | -0.50453600 | -2.53750900 |
| H | -3.70863700 | -1.22460000 | -3.22573800 |
| C | 0.04304000  | -2.20772600 | 0.81777100  |
| H | 1.05537200  | -2.29030500 | 1.20086000  |

|    |             |             |             |
|----|-------------|-------------|-------------|
| H  | -0.73680600 | -1.95336300 | 1.52865100  |
| C  | -0.26960800 | -2.63631700 | -0.42271600 |
| H  | 0.00275900  | -0.27075000 | -1.89516800 |
| H  | -1.31684400 | -2.63047800 | -0.71753900 |
| C  | 0.68211100  | -3.25890500 | -1.39412100 |
| H  | 1.72073600  | -3.17229300 | -1.07216200 |
| H  | 0.44448600  | -4.32447600 | -1.49217400 |
| H  | 0.57935200  | -2.81929900 | -2.38849500 |
| Co | -0.01155500 | -0.08094400 | -0.31043500 |

 **$^{3/2}\text{Co}(+)-10$** 

| Atom | x           | y           | z           |
|------|-------------|-------------|-------------|
| C    | 1.17034100  | 2.38208200  | 0.07115200  |
| C    | 1.20830900  | 3.76193100  | 0.27779700  |
| C    | 0.00000000  | 4.45155800  | 0.36575500  |
| C    | -1.20830900 | 3.76193100  | 0.27779700  |
| C    | -1.17034100 | 2.38208200  | 0.07115200  |
| N    | 0.00000000  | 1.75153600  | -0.06282900 |
| H    | 0.00000000  | 5.52391300  | 0.52434200  |
| H    | 2.14864500  | 4.28841700  | 0.37826300  |
| H    | -2.14864500 | 4.28841700  | 0.37826200  |
| C    | 2.35764100  | 1.46834500  | 0.04788500  |
| C    | -2.35764100 | 1.46834500  | 0.04788500  |
| N    | -2.07617200 | 0.21373900  | 0.01823900  |
| N    | 2.07617200  | 0.21373900  | 0.01824000  |
| C    | -3.73328700 | 2.06028200  | 0.10753200  |
| H    | -4.49854700 | 1.28819300  | 0.08486000  |
| H    | -3.85947000 | 2.64270300  | 1.02547100  |
| H    | -3.89770300 | 2.74299800  | -0.73141800 |
| C    | 3.73328700  | 2.06028200  | 0.10753300  |
| H    | 3.85947000  | 2.64270300  | 1.02547100  |
| H    | 4.49854700  | 1.28819300  | 0.08486000  |
| H    | 3.89770300  | 2.74299800  | -0.73141800 |
| C    | -3.09522100 | -0.80135600 | 0.02687000  |
| C    | -3.70264800 | -1.18586600 | -1.18003600 |
| C    | -3.38200000 | -1.43276800 | 1.24822800  |
| C    | -4.64457100 | -2.21601100 | -1.13053900 |
| C    | -4.33427200 | -2.45354500 | 1.24543200  |
| C    | -4.96403000 | -2.84274700 | 0.06860100  |
| H    | -5.12579100 | -2.53289500 | -2.05002400 |
| H    | -4.57711000 | -2.95075900 | 2.17893000  |
| H    | -5.69702600 | -3.64173700 | 0.08415800  |
| C    | 3.09522100  | -0.80135600 | 0.02687000  |
| C    | 3.38200000  | -1.43276900 | 1.24822800  |

|    |             |             |             |
|----|-------------|-------------|-------------|
| C  | 3.70264800  | -1.18586500 | -1.18003600 |
| C  | 4.33427200  | -2.45354500 | 1.24543200  |
| C  | 4.64457100  | -2.21601100 | -1.13053900 |
| C  | 4.96403000  | -2.84274700 | 0.06860100  |
| H  | 4.57711000  | -2.95075900 | 2.17893000  |
| H  | 5.12579100  | -2.53289500 | -2.05002400 |
| H  | 5.69702700  | -3.64173700 | 0.08415800  |
| C  | 2.68960100  | -1.02213000 | 2.52406300  |
| H  | 2.93684900  | 0.00295600  | 2.81954000  |
| H  | 1.59986100  | -1.07224400 | 2.42761100  |
| H  | 2.97617200  | -1.67483400 | 3.34901800  |
| C  | 3.33815800  | -0.53818500 | -2.49311800 |
| H  | 2.26763400  | -0.63325400 | -2.70150500 |
| H  | 3.58474900  | 0.52843600  | -2.51942100 |
| H  | 3.87274200  | -1.01045300 | -3.31757000 |
| C  | -2.68960100 | -1.02212900 | 2.52406300  |
| H  | -1.59986100 | -1.07224400 | 2.42761100  |
| H  | -2.93684900 | 0.00295700  | 2.81954000  |
| H  | -2.97617200 | -1.67483300 | 3.34901800  |
| C  | -3.33815800 | -0.53818500 | -2.49311800 |
| H  | -3.58474900 | 0.52843600  | -2.51942200 |
| H  | -2.26763400 | -0.63325500 | -2.70150500 |
| H  | -3.87274200 | -1.01045400 | -3.31757000 |
| H  | 0.00000000  | -1.71284700 | -1.17537700 |
| Co | 0.00000000  | -0.29218300 | -0.48819600 |

**<sup>1</sup>Fe(+)****<sup>1</sup>Fe(+)-1**

| Atom | x           | y          | z           |
|------|-------------|------------|-------------|
| C    | -1.17707400 | 2.47433000 | -0.02646800 |
| C    | -1.21051000 | 3.86594200 | 0.05524700  |
| C    | -0.00003400 | 4.56059400 | 0.08501700  |
| C    | 1.21049300  | 3.86591100 | 0.05517700  |
| C    | 1.17703000  | 2.47435600 | -0.02652400 |
| N    | -0.00002200 | 1.82832500 | -0.08520100 |
| H    | -0.00001700 | 5.64234100 | 0.14860600  |
| H    | -2.15102100 | 4.40035200 | 0.10525600  |
| H    | 2.15099400  | 4.40034300 | 0.10510800  |
| C    | -2.32447100 | 1.53791700 | -0.00828900 |
| C    | 2.32449700  | 1.53791000 | -0.00844000 |
| N    | 1.99844100  | 0.27920000 | -0.01345700 |
| N    | -1.99833400 | 0.27917400 | -0.01334700 |
| C    | 3.72070400  | 2.07567700 | 0.04415400  |
| H    | 3.90632200  | 2.73916100 | -0.80576200 |



|   |             |             |             |
|---|-------------|-------------|-------------|
| H | 3.86602400  | 2.67050400  | 0.95139800  |
| H | 4.46100900  | 1.27989700  | 0.03246000  |
| C | -3.72072000 | 2.07559900  | 0.04416500  |
| H | -3.86619800 | 2.67037600  | 0.95141800  |
| H | -3.90630800 | 2.73909800  | -0.80574600 |
| H | -4.46097600 | 1.27977300  | 0.03235700  |
| C | 3.01615400  | -0.74363200 | 0.02237200  |
| C | 3.42349700  | -1.24365100 | 1.26885700  |
| C | 3.51583800  | -1.24398900 | -1.19041400 |
| C | 4.38068700  | -2.26083500 | 1.27797000  |
| C | 4.47060900  | -2.26154400 | -1.12872900 |
| C | 4.90363200  | -2.76547600 | 0.09269800  |
| H | 4.71315900  | -2.66284300 | 2.22950400  |
| H | 4.87290500  | -2.66390700 | -2.05274400 |
| H | 5.64383800  | -3.55749100 | 0.12050100  |
| C | -3.01604500 | -0.74366800 | 0.02253500  |
| C | -3.51604400 | -1.24375600 | -1.19023500 |
| C | -3.42310900 | -1.24394200 | 1.26900700  |
| C | -4.47078000 | -2.26134200 | -1.12853900 |
| C | -4.38027100 | -2.26115600 | 1.27813200  |
| C | -4.90349100 | -2.76555600 | 0.09288100  |
| H | -4.87329600 | -2.66351100 | -2.05254500 |
| H | -4.71248100 | -2.66339400 | 2.22966000  |
| H | -5.64365500 | -3.55761100 | 0.12068900  |
| C | -3.03484200 | -0.71486200 | -2.51854400 |
| H | -3.25654300 | 0.34899600  | -2.65078100 |
| H | -1.95150500 | -0.83417400 | -2.63140500 |
| H | -3.50816800 | -1.24848500 | -3.34307700 |
| C | -2.85062900 | -0.70892600 | 2.55796400  |
| H | -1.75720400 | -0.74972500 | 2.56142400  |
| H | -3.13316200 | 0.33410100  | 2.73632100  |
| H | -3.20609700 | -1.28871400 | 3.41013200  |
| C | 3.03420600  | -0.71545900 | -2.51870900 |
| H | 1.95085500  | -0.83500900 | -2.63122700 |
| H | 3.25566900  | 0.34840900  | -2.65125800 |
| H | 3.50739400  | -1.24918500 | -3.34325400 |
| C | 2.85117900  | -0.70844900 | 2.55780600  |
| H | 3.13283300  | 0.33491900  | 2.73551400  |
| H | 1.75778400  | -0.75023900 | 2.56174100  |
| H | 3.20751900  | -1.28750000 | 3.41011000  |
| C | -0.00014800 | -2.09499500 | -0.17042200 |
| H | -0.00159900 | -2.41671700 | 0.88095000  |
| H | -0.89057500 | -2.51825900 | -0.64571300 |

|                            |             |             |             |
|----------------------------|-------------|-------------|-------------|
| H                          | 0.89136400  | -2.51848800 | -0.64343900 |
| Fe                         | -0.00006200 | -0.12891900 | -0.19746800 |
| <b><sup>1</sup>Fe(+)-2</b> |             |             |             |
| Atom                       | x           | y           | z           |
| C                          | 1.17611500  | 2.43845100  | -0.35472700 |
| C                          | 1.20584600  | 3.79352800  | -0.68245100 |
| C                          | -0.00010300 | 4.48134400  | -0.81742900 |
| C                          | -1.20602900 | 3.79359700  | -0.68194700 |
| C                          | -1.17622700 | 2.43851700  | -0.35423700 |
| N                          | -0.00003500 | 1.81236700  | -0.12785000 |
| H                          | -0.00012500 | 5.53546300  | -1.06775300 |
| H                          | 2.14721000  | 4.30236100  | -0.84818700 |
| H                          | -2.14744100 | 4.30247000  | -0.84729400 |
| C                          | 2.32444100  | 1.51722500  | -0.31443200 |
| C                          | -2.32455300 | 1.51733200  | -0.31363300 |
| N                          | -2.01155900 | 0.26863200  | -0.12176000 |
| N                          | 2.01146200  | 0.26853200  | -0.12246500 |
| C                          | -3.70916700 | 2.03972200  | -0.55686000 |
| H                          | -4.00145100 | 2.73768700  | 0.23371600  |
| H                          | -3.75161700 | 2.58903000  | -1.50152000 |
| H                          | -4.44136100 | 1.23709700  | -0.59557300 |
| C                          | 3.70904500  | 2.03956400  | -0.55780400 |
| H                          | 3.75118100  | 2.58986800  | -1.50188800 |
| H                          | 4.00189000  | 2.73659700  | 0.23339300  |
| H                          | 4.44103200  | 1.23680400  | -0.59768700 |
| C                          | -3.02222200 | -0.75985800 | -0.14185200 |
| C                          | -3.12950700 | -1.54153300 | -1.30833800 |
| C                          | -3.82742300 | -0.99775700 | 0.98494000  |
| C                          | -4.05239900 | -2.58707400 | -1.31621500 |
| C                          | -4.72831200 | -2.06678200 | 0.93186100  |
| C                          | -4.84068400 | -2.85860700 | -0.20253600 |
| H                          | -4.15077100 | -3.19637800 | -2.20874800 |
| H                          | -5.35130000 | -2.27164300 | 1.79689000  |
| H                          | -5.54403800 | -3.68379700 | -0.22219600 |
| C                          | 3.02210100  | -0.75996400 | -0.14224100 |
| C                          | 3.82764100  | -0.99718800 | 0.98443100  |
| C                          | 3.12904200  | -1.54236500 | -1.30830600 |
| C                          | 4.72852200  | -2.06626100 | 0.93173100  |
| C                          | 4.05192400  | -2.58789000 | -1.31583200 |
| C                          | 4.84055100  | -2.85876300 | -0.20220200 |
| H                          | 5.35177300  | -2.27057300 | 1.79670500  |
| H                          | 4.15005900  | -3.19771100 | -2.20803700 |
| H                          | 5.54391100  | -3.68395500 | -0.22158900 |

|    |             |             |             |
|----|-------------|-------------|-------------|
| C  | 3.79284600  | -0.12442100 | 2.21656900  |
| H  | 4.53746700  | 0.67704600  | 2.15445300  |
| H  | 2.82488600  | 0.35036600  | 2.37395900  |
| H  | 4.02939300  | -0.70332700 | 3.11099200  |
| C  | 2.30978200  | -1.23780600 | -2.53719800 |
| H  | 1.24126200  | -1.18662500 | -2.31513100 |
| H  | 2.58862800  | -0.27683100 | -2.98254900 |
| H  | 2.45523600  | -2.00321500 | -3.30016500 |
| C  | -3.79222200 | -0.12559200 | 2.21747700  |
| H  | -2.82260700 | 0.34483600  | 2.37790400  |
| H  | -4.53306100 | 0.67925200  | 2.15368200  |
| H  | -4.03381000 | -0.70382700 | 3.11096000  |
| C  | -2.31057800 | -1.23628100 | -2.53728300 |
| H  | -2.58987600 | -0.27527500 | -2.98228900 |
| H  | -1.24203100 | -1.18475100 | -2.31541000 |
| H  | -2.45588600 | -2.00149900 | -3.30047000 |
| C  | -0.00044200 | -2.07873200 | 0.35790700  |
| H  | -0.00124000 | -2.41548200 | -0.68528500 |
| H  | 0.89150300  | -2.48927400 | 0.83952600  |
| H  | -0.89206000 | -2.48869000 | 0.84064000  |
| C  | 0.00142200  | -0.36579900 | 2.79162000  |
| H  | 0.91935900  | -0.93309400 | 2.88922100  |
| H  | -0.91567700 | -0.93428100 | 2.89010900  |
| C  | 0.00056500  | 0.97719200  | 2.72528500  |
| H  | -0.91849800 | 1.55236700  | 2.74106600  |
| H  | 0.91895600  | 1.55345600  | 2.74032700  |
| Fe | 0.00000600  | -0.09361500 | 0.34788300  |

**<sup>1</sup>Fe(+)-TS-2/3**

| Atom | x           | y          | z          |
|------|-------------|------------|------------|
| C    | 1.18179700  | 2.48086100 | 0.27614500 |
| C    | 1.20567400  | 3.84628200 | 0.55598100 |
| C    | -0.00011100 | 4.53996200 | 0.66056600 |
| C    | -1.20556500 | 3.84757300 | 0.54275100 |
| C    | -1.17946600 | 2.48270800 | 0.26192500 |
| N    | 0.00183900  | 1.84528500 | 0.06045900 |
| H    | -0.00063400 | 5.60200800 | 0.87406300 |
| H    | 2.14616200  | 4.36109500 | 0.70782600 |
| H    | -2.14736900 | 4.36263900 | 0.68565600 |
| C    | 2.32877000  | 1.56557500 | 0.28522100 |
| C    | -2.32761300 | 1.56905600 | 0.25793400 |
| N    | -2.01559800 | 0.30811000 | 0.13042700 |
| N    | 2.01479400  | 0.30481200 | 0.15903100 |
| C    | -3.71226100 | 2.10510600 | 0.47753400 |

|   |             |             |             |
|---|-------------|-------------|-------------|
| H | -3.76017800 | 2.66233600  | 1.41752000  |
| H | -3.99320100 | 2.79841000  | -0.32045000 |
| H | -4.45106000 | 1.30852600  | 0.51962900  |
| C | 3.71370200  | 2.09827800  | 0.50971400  |
| H | 4.03157900  | 2.72330500  | -0.33014500 |
| H | 3.74288400  | 2.72434500  | 1.40538800  |
| H | 4.43723000  | 1.29600200  | 0.63357400  |
| C | -3.02229400 | -0.71917000 | 0.18472000  |
| C | -3.84463100 | -0.98544400 | -0.92647500 |
| C | -3.10538600 | -1.48343700 | 1.36416700  |
| C | -4.75367400 | -2.04340500 | -0.82950800 |
| C | -4.03604400 | -2.52253200 | 1.41501300  |
| C | -4.85318000 | -2.80708200 | 0.32678000  |
| H | -5.39303000 | -2.26547700 | -1.67786600 |
| H | -4.11745000 | -3.11381200 | 2.32134400  |
| H | -5.56621300 | -3.62243900 | 0.37994500  |
| C | 3.01449900  | -0.72750300 | 0.21019400  |
| C | 3.04576400  | -1.53658400 | 1.36443700  |
| C | 3.87666900  | -0.96411600 | -0.87692400 |
| C | 3.96255000  | -2.58633700 | 1.41323400  |
| C | 4.76787900  | -2.03902500 | -0.78495000 |
| C | 4.81589800  | -2.84373800 | 0.34492300  |
| H | 4.00495000  | -3.20929400 | 2.30077600  |
| H | 5.43474000  | -2.23948200 | -1.61765900 |
| H | 5.51626200  | -3.67022400 | 0.39477900  |
| C | 2.13390400  | -1.26310200 | 2.53299900  |
| H | 2.29834400  | -0.26870600 | 2.95886700  |
| H | 1.07974500  | -1.31050900 | 2.24305000  |
| H | 2.29096700  | -1.99234100 | 3.32845200  |
| C | 3.89705200  | -0.09797000 | -2.11381200 |
| H | 2.92288500  | 0.33016300  | -2.34747600 |
| H | 4.59990900  | 0.73530200  | -2.00676800 |
| H | 4.22441800  | -0.67256300 | -2.98189300 |
| C | -2.23352700 | -1.17794300 | 2.55537600  |
| H | -1.17041100 | -1.22027900 | 2.30020600  |
| H | -2.42098700 | -0.17688600 | 2.95591900  |
| H | -2.40983700 | -1.89191900 | 3.36055000  |
| C | -3.78525200 | -0.16654500 | -2.19365700 |
| H | -4.21870500 | 0.83002300  | -2.06055500 |
| H | -2.76427100 | -0.02472100 | -2.55138000 |
| H | -4.34937800 | -0.65212600 | -2.99068500 |
| C | 0.03854300  | -1.56273000 | -2.14226900 |
| H | 0.96225200  | -1.66923300 | -2.69739200 |

|    |             |             |             |
|----|-------------|-------------|-------------|
| H  | -0.85224600 | -1.67917800 | -2.74662000 |
| C  | 0.00314800  | -1.99768100 | -0.79187600 |
| H  | -0.92597700 | -2.41942000 | -0.41901900 |
| H  | 0.91221000  | -2.41983500 | -0.37307000 |
| Fe | 0.00211900  | -0.00362900 | -0.42260900 |
| C  | 0.03419600  | 0.53219900  | -2.62738500 |
| H  | 0.05333000  | 0.12734600  | -3.63332300 |
| H  | -0.86772100 | 1.13480500  | -2.51882500 |
| H  | 0.92221800  | 1.14951300  | -2.49256400 |

**<sup>1</sup>Fe(+)-3**

| Atom | x           | y           | z           |
|------|-------------|-------------|-------------|
| C    | 1.17763300  | 2.70403100  | -0.05797300 |
| C    | 1.20953700  | 4.09122800  | -0.19182800 |
| C    | 0.00004900  | 4.78581600  | -0.25024600 |
| C    | -1.20943300 | 4.09120900  | -0.19175000 |
| C    | -1.17751600 | 2.70401700  | -0.05789700 |
| N    | 0.00006800  | 2.05431300  | 0.02105800  |
| H    | 0.00003300  | 5.86422000  | -0.35526200 |
| H    | 2.15049200  | 4.62309800  | -0.25880200 |
| H    | -2.15039100 | 4.62307600  | -0.25870000 |
| C    | 2.32574300  | 1.77718500  | -0.02547200 |
| C    | -2.32561300 | 1.77714800  | -0.02534000 |
| N    | -2.00641700 | 0.51608700  | 0.03986000  |
| N    | 2.00651300  | 0.51613700  | 0.03980500  |
| C    | -3.72119200 | 2.31729900  | -0.09115000 |
| H    | -3.89704600 | 3.02148300  | 0.72739100  |
| H    | -3.87384300 | 2.86803500  | -1.02448800 |
| H    | -4.46480900 | 1.52654500  | -0.03362300 |
| C    | 3.72131900  | 2.31734500  | -0.09135600 |
| H    | 3.87395200  | 2.86795700  | -1.02477100 |
| H    | 3.89718000  | 3.02164200  | 0.72708400  |
| H    | 4.46494800  | 1.52660900  | -0.03372900 |
| C    | -3.03230100 | -0.49768100 | 0.05342000  |
| C    | -3.48304600 | -1.01838200 | -1.17032600 |
| C    | -3.50945500 | -0.96310600 | 1.28998800  |
| C    | -4.44270600 | -2.03298600 | -1.13079400 |
| C    | -4.46945300 | -1.97747400 | 1.27667500  |
| C    | -4.93331800 | -2.51067600 | 0.07907600  |
| H    | -4.80552800 | -2.45168700 | -2.06392500 |
| H    | -4.85399100 | -2.35197900 | 2.21978400  |
| H    | -5.67628500 | -3.30056400 | 0.08905300  |
| C    | 3.03230300  | -0.49772700 | 0.05338700  |
| C    | 3.50948200  | -0.96309000 | 1.28997600  |

|    |             |             |             |
|----|-------------|-------------|-------------|
| C  | 3.48290700  | -1.01859800 | -1.17032800 |
| C  | 4.46936200  | -1.97756200 | 1.27670100  |
| C  | 4.44243000  | -2.03333900 | -1.13076000 |
| C  | 4.93307300  | -2.51095500 | 0.07912200  |
| H  | 4.85393900  | -2.35200300 | 2.21982000  |
| H  | 4.80510800  | -2.45220000 | -2.06387400 |
| H  | 5.67593500  | -3.30094000 | 0.08913900  |
| C  | 3.01765500  | -0.38388100 | 2.59339300  |
| H  | 3.26982000  | 0.67647600  | 2.69677200  |
| H  | 1.93000400  | -0.46506900 | 2.69268200  |
| H  | 3.46139500  | -0.90575500 | 3.44161800  |
| C  | 2.97311700  | -0.49192000 | -2.48948100 |
| H  | 1.88225500  | -0.42027300 | -2.51053900 |
| H  | 3.36393800  | 0.50791300  | -2.70798300 |
| H  | 3.27883200  | -1.14132300 | -3.31034300 |
| C  | -3.01752200 | -0.38405500 | 2.59343300  |
| H  | -1.92984700 | -0.46509700 | 2.69256800  |
| H  | -3.26982900 | 0.67625000  | 2.69701500  |
| H  | -3.46107900 | -0.90612800 | 3.44163100  |
| C  | -2.97324000 | -0.49164100 | -2.48944900 |
| H  | -3.36368300 | 0.50838400  | -2.70772400 |
| H  | -1.88234800 | -0.42042600 | -2.51062100 |
| H  | -3.27930800 | -1.14077700 | -3.31039200 |
| C  | 0.00003800  | -1.85980300 | 0.50345900  |
| H  | 0.88521000  | -2.10098100 | 1.10775000  |
| H  | -0.88507900 | -2.10092600 | 1.10785800  |
| Fe | 0.00006000  | 0.10289700  | 0.24318100  |
| C  | -0.00006900 | -2.69008300 | -0.78365000 |
| H  | 0.87810300  | -2.44377200 | -1.39148900 |
| H  | -0.87833700 | -2.44374100 | -1.39133700 |
| C  | -0.00012300 | -4.20407600 | -0.51905700 |
| H  | 0.88290700  | -4.50414400 | 0.05205000  |
| H  | -0.88314200 | -4.50406500 | 0.05211400  |
| H  | -0.00018300 | -4.77036900 | -1.45513200 |

**<sup>1</sup>Fe(+)-4**

| Atom | x           | y           | z           |
|------|-------------|-------------|-------------|
| Fe   | -0.03928400 | 0.07460100  | 0.38534600  |
| N    | -0.11123400 | 2.01772400  | -0.03393400 |
| C    | -1.31018100 | 2.62237900  | -0.19276500 |
| C    | -2.43570600 | 1.67470500  | -0.19952700 |
| N    | -2.09987300 | 0.42385200  | -0.08362800 |
| C    | -3.10066200 | -0.60669600 | -0.20601700 |
| C    | -3.23964100 | -1.23813200 | -1.45496700 |

|   |             |             |             |
|---|-------------|-------------|-------------|
| C | -2.45415400 | -0.78407600 | -2.66017600 |
| H | -2.55358300 | -1.49665700 | -3.47973300 |
| C | -4.16288600 | -2.27999600 | -1.56551600 |
| C | -4.92338800 | -2.68470600 | -0.47496700 |
| C | -4.77792400 | -2.03843100 | 0.74682100  |
| C | -3.87065800 | -0.98762900 | 0.90667500  |
| C | -3.76404100 | -0.28061300 | 2.23594400  |
| H | -2.73278400 | -0.20796600 | 2.58650300  |
| H | -5.37871500 | -2.34852900 | 1.59574100  |
| H | -4.28370000 | -2.77720400 | -2.52258300 |
| C | -3.83084100 | 2.18658000  | -0.41454100 |
| H | -4.10761000 | 2.89424600  | 0.37239300  |
| H | -3.89962800 | 2.72283600  | -1.36559400 |
| H | -4.55978800 | 1.38046600  | -0.42702700 |
| C | -1.39252200 | 3.99471300  | -0.42700900 |
| C | -0.21555800 | 4.73284900  | -0.54174300 |
| C | 1.01293900  | 4.07652000  | -0.48339900 |
| C | 1.03479600  | 2.70184000  | -0.24833200 |
| C | 2.22182500  | 1.83321700  | -0.29619500 |
| N | 1.97852900  | 0.56184800  | -0.16577200 |
| C | 3.05007800  | -0.39369900 | -0.27859000 |
| C | 3.14892400  | -1.11470900 | -1.48554700 |
| C | 4.13901100  | -2.09067800 | -1.59056900 |
| C | 5.00377300  | -2.35382000 | -0.53220200 |
| C | 4.89863100  | -1.62245600 | 0.64226600  |
| C | 3.93060700  | -0.62306700 | 0.79246600  |
| H | 5.57973200  | -1.82091200 | 1.46403900  |
| H | 4.23162700  | -2.65075100 | -2.51541200 |
| C | 3.57088100  | 2.43943000  | -0.55369500 |
| H | 3.87102400  | 3.07951600  | 0.28178200  |
| H | 4.33497100  | 1.67911700  | -0.69314200 |
| H | 3.54535800  | 3.06872800  | -1.44725800 |
| H | 1.93339100  | 4.62589500  | -0.63540800 |
| H | -0.25596600 | 5.80115200  | -0.71751600 |
| H | -2.35429200 | 4.47978600  | -0.53700500 |
| H | 5.76105400  | -3.12426000 | -0.62732800 |
| C | 3.90241400  | 0.17975600  | 2.07176600  |
| H | 4.66678300  | 0.96435800  | 2.05962700  |
| H | -5.63046500 | -3.50054000 | -0.57738600 |
| C | 2.24360400  | -0.81593100 | -2.65417600 |
| H | 2.40878800  | -1.52639900 | -3.46482200 |
| C | -0.14412400 | -1.92603200 | 0.26434500  |
| H | -1.15623400 | -2.16419900 | 0.61242000  |

|   |             |             |             |
|---|-------------|-------------|-------------|
| H | -0.16007400 | -2.02149500 | -0.83352100 |
| H | -1.38987400 | -0.67143600 | -2.44073400 |
| H | -2.80536100 | 0.18551800  | -3.03026400 |
| H | -4.33354500 | -0.80887400 | 3.00112800  |
| H | -4.15928400 | 0.73987500  | 2.19116900  |
| H | 4.11856800  | -0.45363800 | 2.93446900  |
| H | 2.94501600  | 0.66844800  | 2.24941400  |
| H | 2.41941100  | 0.18673300  | -3.05791100 |
| H | 1.18767400  | -0.86459400 | -2.37735600 |
| C | 0.61853600  | -4.34966000 | 0.41086000  |
| C | 0.86391300  | -2.90054400 | 0.86337200  |
| H | 1.33747100  | -5.03308700 | 0.87176300  |
| H | 0.71648600  | -4.44798200 | -0.67424500 |
| H | -0.38534200 | -4.68825400 | 0.68317000  |
| H | 1.88610200  | -2.62032400 | 0.59647500  |
| H | 0.81281200  | -2.87005100 | 1.95792800  |
| C | 0.14688100  | -0.25918200 | 2.74156400  |
| C | -0.03314900 | 1.07641800  | 2.71030400  |
| H | -0.67482700 | -0.94439600 | 2.91184600  |
| H | 1.13709400  | -0.69781800 | 2.76914300  |
| H | -1.01509700 | 1.52485500  | 2.81228000  |
| H | 0.80394700  | 1.76412900  | 2.67861200  |

**<sup>1</sup>Fe(+)-TS-4/5**

| Atom | x           | y          | z           |
|------|-------------|------------|-------------|
| C    | 1.11935000  | 2.57026700 | -0.30245300 |
| C    | 1.12043600  | 3.93441000 | -0.59067700 |
| C    | -0.09017800 | 4.61276300 | -0.69754000 |
| C    | -1.27775600 | 3.89635900 | -0.56711900 |
| C    | -1.23147600 | 2.53264300 | -0.28351000 |
| N    | -0.04411000 | 1.89960000 | -0.08851700 |
| H    | -0.10920700 | 5.67419300 | -0.91334200 |
| H    | 2.05453100  | 4.45994000 | -0.74214100 |
| H    | -2.22949800 | 4.39426500 | -0.70063500 |
| C    | 2.32261700  | 1.72594400 | -0.27679400 |
| C    | -2.41287100 | 1.65144900 | -0.26321300 |
| N    | -2.16562800 | 0.39132600 | -0.10240600 |
| N    | 2.10980100  | 0.45957700 | -0.09060800 |
| C    | -3.77562900 | 2.24661800 | -0.49489500 |
| H    | -4.02197100 | 2.97296800 | 0.28494000  |
| H    | -3.81217100 | 2.77584100 | -1.45101400 |
| H    | -4.54654600 | 1.47980400 | -0.50550900 |
| C    | 3.66886500  | 2.35257900 | -0.51742600 |
| H    | 3.69876100  | 2.84814000 | -1.49191000 |



|   |             |             |             |
|---|-------------|-------------|-------------|
| H | 3.88421000  | 3.11469200  | 0.23691800  |
| H | 4.46390700  | 1.61109500  | -0.49276900 |
| C | -3.21630200 | -0.58316400 | -0.19661100 |
| C | -3.37958800 | -1.24813300 | -1.42964900 |
| C | -4.01334800 | -0.90531100 | 0.91703500  |
| C | -4.32853300 | -2.26809500 | -1.51348600 |
| C | -4.94420900 | -1.94135300 | 0.78582100  |
| C | -5.10002200 | -2.62503100 | -0.41264400 |
| H | -4.46420500 | -2.78496300 | -2.45827700 |
| H | -5.56071100 | -2.20389300 | 1.64000900  |
| H | -5.82656000 | -3.42618200 | -0.49269200 |
| C | 3.19668600  | -0.47732300 | -0.15713900 |
| C | 3.94372200  | -0.78331500 | 0.99543600  |
| C | 3.45215400  | -1.11073700 | -1.38821700 |
| C | 4.93594500  | -1.76316100 | 0.89804500  |
| C | 4.45736400  | -2.07959200 | -1.43682100 |
| C | 5.19078400  | -2.41306300 | -0.30372700 |
| H | 5.51985900  | -2.01025600 | 1.77899000  |
| H | 4.66727300  | -2.57348000 | -2.38029500 |
| H | 5.96493000  | -3.17045600 | -0.35934900 |
| C | 3.72697800  | -0.05334000 | 2.29864200  |
| H | 4.30981500  | -0.50869500 | 3.10007400  |
| H | 4.03410100  | 0.99572200  | 2.23327300  |
| H | 2.67980400  | -0.05462800 | 2.60832400  |
| C | 2.69768700  | -0.73244500 | -2.63957000 |
| H | 1.61498300  | -0.74023700 | -2.49106300 |
| H | 2.95930800  | 0.27479000  | -2.98086200 |
| H | 2.92899200  | -1.41850800 | -3.45518800 |
| C | -3.94662500 | -0.13265700 | 2.21258700  |
| H | -2.94366800 | 0.22339200  | 2.44427200  |
| H | -4.59531100 | 0.75010200  | 2.18006300  |
| H | -4.28880000 | -0.74309700 | 3.05007000  |
| C | -2.59247100 | -0.84065800 | -2.65131900 |
| H | -2.93404600 | 0.12293400  | -3.04506900 |
| H | -1.52606200 | -0.73082800 | -2.44229100 |
| H | -2.70741800 | -1.57331800 | -3.45121700 |
| C | 0.33621300  | -1.94933700 | 1.24159100  |
| H | 1.42135900  | -1.98784000 | 1.33434700  |
| H | -0.09580600 | -2.68967700 | 1.90862700  |
| C | -0.13772200 | -2.24785200 | -0.17995000 |
| H | 0.05906900  | -1.41467900 | -0.88661600 |
| H | -1.21557800 | -2.40828800 | -0.19071500 |
| C | 0.57984600  | -3.48479100 | -0.75219800 |

|    |             |             |             |
|----|-------------|-------------|-------------|
| H  | 1.66034300  | -3.34021900 | -0.79699700 |
| H  | 0.37990600  | -4.36238400 | -0.13298200 |
| H  | 0.22059000  | -3.70053200 | -1.76143200 |
| C  | -0.19935900 | -0.64334400 | 2.74644700  |
| H  | 0.60760000  | -1.08648600 | 3.31806000  |
| H  | -1.16250900 | -1.09547100 | 2.95066800  |
| C  | -0.16597200 | 0.76396300  | 2.51742500  |
| H  | -1.08373300 | 1.33757200  | 2.58772400  |
| H  | 0.72839800  | 1.31612400  | 2.79024700  |
| Fe | 0.01331100  | 0.09204900  | 0.60761700  |

**<sup>1</sup>Fe(+)-5**

| Atom | x           | y           | z           |
|------|-------------|-------------|-------------|
| C    | 1.35817100  | -2.98782200 | 0.26969400  |
| C    | 1.46482400  | -4.35446700 | 0.51903000  |
| C    | 0.29462600  | -5.10875100 | 0.62963000  |
| C    | -0.95024700 | -4.49040900 | 0.50589200  |
| C    | -0.99419100 | -3.11907500 | 0.25710400  |
| N    | 0.14687400  | -2.41226200 | 0.13238800  |
| H    | 0.35345500  | -6.17297600 | 0.82427700  |
| H    | 2.43285400  | -4.82626700 | 0.63348400  |
| H    | -1.86126300 | -5.06658400 | 0.61001700  |
| C    | 2.45374700  | -2.00603600 | 0.15789600  |
| C    | -2.18952900 | -2.26520900 | 0.13728900  |
| N    | -1.93867200 | -0.99927500 | -0.04509300 |
| N    | 2.06751000  | -0.77573600 | -0.02562700 |
| C    | -3.55472700 | -2.87120300 | 0.25293400  |
| H    | -3.69387000 | -3.64568800 | -0.50725700 |
| H    | -3.67773900 | -3.35419300 | 1.22714200  |
| H    | -4.33933700 | -2.12788700 | 0.13684300  |
| C    | 3.87630900  | -2.45953300 | 0.27969800  |
| H    | 4.04646700  | -2.92600800 | 1.25481800  |
| H    | 4.10251300  | -3.21471200 | -0.47893900 |
| H    | 4.57566200  | -1.63512700 | 0.16632200  |
| C    | -3.01827200 | -0.04761400 | -0.14248200 |
| C    | -3.47477700 | 0.57254800  | 1.03199500  |
| C    | -3.54304000 | 0.26157300  | -1.40820600 |
| C    | -4.48861100 | 1.52625100  | 0.91210700  |
| C    | -4.55429700 | 1.22282700  | -1.47598000 |
| C    | -5.02455000 | 1.85214600  | -0.32865300 |
| H    | -4.85777200 | 2.01816500  | 1.80621700  |
| H    | -4.97512400 | 1.47801800  | -2.44312200 |
| H    | -5.80901600 | 2.59736000  | -0.40180900 |
| C    | 3.03606300  | 0.28802200  | -0.12956800 |

|    |             |             |             |
|----|-------------|-------------|-------------|
| C  | 3.52731100  | 0.63944500  | -1.39773400 |
| C  | 3.41508000  | 0.96949500  | 1.03853000  |
| C  | 4.42657900  | 1.70553300  | -1.47460200 |
| C  | 4.31717500  | 2.02822200  | 0.90942600  |
| C  | 4.81886800  | 2.39690900  | -0.33377300 |
| H  | 4.82004100  | 1.99454200  | -2.44374100 |
| H  | 4.62605500  | 2.56866300  | 1.79836500  |
| H  | 5.51558100  | 3.22409200  | -0.41376300 |
| C  | 3.11286100  | -0.11036400 | -2.63964300 |
| H  | 3.43859400  | -1.15545800 | -2.61983600 |
| H  | 2.02570100  | -0.11648500 | -2.77012200 |
| H  | 3.54515800  | 0.34578500  | -3.53056400 |
| C  | 2.88692500  | 0.56699300  | 2.39346100  |
| H  | 1.79489800  | 0.50613100  | 2.40670400  |
| H  | 3.26479600  | -0.41202400 | 2.70693400  |
| H  | 3.18702100  | 1.28648200  | 3.15579300  |
| C  | -3.05135900 | -0.42835500 | -2.65672600 |
| H  | -1.96804400 | -0.33080400 | -2.78054100 |
| H  | -3.27735900 | -1.49971000 | -2.65166500 |
| H  | -3.52064100 | -0.00388400 | -3.54461400 |
| C  | -2.91075600 | 0.21439700  | 2.38507600  |
| H  | -3.21961700 | -0.78645000 | 2.70596200  |
| H  | -1.81727000 | 0.22763500  | 2.39126300  |
| H  | -3.25470400 | 0.91547300  | 3.14611200  |
| C  | -0.06183800 | 1.40863300  | -0.80446100 |
| H  | 0.83192500  | 1.62312200  | -1.40557800 |
| H  | -0.93270400 | 1.50044300  | -1.46809400 |
| C  | -0.17261400 | 2.40345600  | 0.35390100  |
| H  | 0.69704400  | 2.31183200  | 1.01616800  |
| H  | -1.05478000 | 2.17656500  | 0.96441600  |
| C  | -0.27310800 | 3.86689900  | -0.11459600 |
| H  | 0.61074000  | 4.11180800  | -0.71661500 |
| H  | -1.13517300 | 3.96802700  | -0.78577800 |
| C  | -0.40259700 | 4.87023200  | 1.03663800  |
| H  | 0.45802900  | 4.76540300  | 1.70927600  |
| H  | -1.28639500 | 4.62046500  | 1.63701300  |
| C  | -0.50339000 | 6.32163300  | 0.56179900  |
| H  | -1.37487900 | 6.47085700  | -0.08297200 |
| H  | -0.59577500 | 7.01228300  | 1.40408800  |
| H  | 0.38169600  | 6.61696900  | -0.00985300 |
| Fe | 0.04190100  | -0.49820000 | -0.28585000 |

**<sup>1</sup>Fe(+)-6**

| Atom | x           | y           | z           |
|------|-------------|-------------|-------------|
| C    | 1.03492700  | 2.70186500  | 0.24831600  |
| C    | 1.01309800  | 4.07653800  | 0.48335600  |
| C    | -0.21539400 | 4.73290800  | 0.54155700  |
| C    | -1.39236600 | 3.99481700  | 0.42668700  |
| C    | -1.31004300 | 2.62246200  | 0.19251900  |
| N    | -0.11108900 | 2.01776200  | 0.03388100  |
| H    | -0.25578700 | 5.80121300  | 0.71732300  |
| H    | 1.93355400  | 4.62587100  | 0.63550800  |
| H    | -2.35412800 | 4.47993200  | 0.53656900  |
| C    | 2.22193900  | 1.83319800  | 0.29631700  |
| C    | -2.43557300 | 1.67481100  | 0.19926200  |
| N    | -2.09970300 | 0.42394500  | 0.08349700  |
| N    | 1.97855700  | 0.56184700  | 0.16607400  |
| C    | -3.83073200 | 2.18667900  | 0.41407700  |
| H    | -3.89970900 | 2.72283400  | 1.36517300  |
| H    | -4.10732300 | 2.89443200  | -0.37284200 |
| H    | -4.55970300 | 1.38058100  | 0.42631400  |
| C    | 3.57092800  | 2.43946200  | 0.55400700  |
| H    | 3.87018400  | 3.08145300  | -0.28030600 |
| H    | 3.54567900  | 3.06689000  | 1.44892300  |
| H    | 4.33545800  | 1.67924100  | 0.69145200  |
| C    | -3.10054400 | -0.60655400 | 0.20605800  |
| C    | -3.87053900 | -0.98764300 | -0.90658300 |
| C    | -3.23959300 | -1.23771200 | 1.45511800  |
| C    | -4.77797000 | -2.03825800 | -0.74651100 |
| C    | -4.16299400 | -2.27943700 | 1.56587900  |
| C    | -4.92356200 | -2.68424300 | 0.47542700  |
| H    | -5.37877800 | -2.34847900 | -1.59537700 |
| H    | -4.28384900 | -2.77643700 | 2.52304800  |
| H    | -5.63077700 | -3.49993800 | 0.57799800  |
| C    | 3.04999900  | -0.39382500 | 0.27880400  |
| C    | 3.14864400  | -1.11506800 | 1.48564400  |
| C    | 3.93058200  | -0.62310600 | -0.79222500 |
| C    | 4.13861100  | -2.09115300 | 1.59059500  |
| C    | 4.89850400  | -1.62261900 | -0.64208800 |
| C    | 5.00345900  | -2.35418800 | 0.53226200  |
| H    | 4.23106500  | -2.65143400 | 2.51532800  |
| H    | 5.57967500  | -1.82098100 | -1.46382500 |
| H    | 5.76064600  | -3.12472900 | 0.62733200  |
| C    | 2.24334700  | -0.81624800 | 2.65427800  |
| H    | 2.42119500  | 0.18541000  | 3.05965300  |
| H    | 1.18745400  | -0.86211000 | 2.37688100  |

|    |             |             |             |
|----|-------------|-------------|-------------|
| H  | 2.40660600  | -1.52831900 | 3.46391000  |
| C  | 3.90264400  | 0.17995900  | -2.07137700 |
| H  | 2.94526600  | 0.66864700  | -2.24919300 |
| H  | 4.66692900  | 0.96463000  | -2.05885800 |
| H  | 4.11905300  | -0.45324100 | -2.93416100 |
| C  | -2.45398800 | -0.78359600 | 2.66023000  |
| H  | -1.38959400 | -0.67178100 | 2.44088600  |
| H  | -2.80458200 | 0.18640100  | 3.02982800  |
| H  | -2.55399200 | -1.49574500 | 3.48009100  |
| C  | -3.76368400 | -0.28101700 | -2.23603400 |
| H  | -4.15976400 | 0.73917500  | -2.19183200 |
| H  | -2.73226900 | -0.20769100 | -2.58598700 |
| H  | -4.33231100 | -0.80999600 | -3.00137900 |
| C  | -0.14456600 | -1.92611700 | -0.26480800 |
| H  | -0.16111700 | -2.02148900 | 0.83306100  |
| H  | -1.15649300 | -2.16414100 | -0.61348800 |
| C  | 0.86382600  | -2.90066600 | -0.86315500 |
| H  | 1.88577000  | -2.62085500 | -0.59492000 |
| H  | 0.81405400  | -2.86964600 | -1.95776000 |
| C  | 0.61750300  | -4.34990600 | -0.41157900 |
| H  | 0.71406600  | -4.44871300 | 0.67360700  |
| H  | -0.38612000 | -4.68815000 | -0.68527400 |
| H  | 1.33683700  | -5.03333000 | -0.87186600 |
| C  | 0.14788500  | -0.25924500 | -2.74183900 |
| H  | 1.13843500  | -0.69713600 | -2.76916200 |
| H  | -0.67325600 | -0.94505000 | -2.91247300 |
| C  | -0.03307200 | 1.07622000  | -2.71043300 |
| H  | -1.01530900 | 1.52398400  | -2.81260700 |
| H  | 0.80351500  | 1.76453500  | -2.67845000 |
| Fe | -0.03933000 | 0.07459200  | -0.38537800 |

**<sup>1</sup>Fe(+)-TS-6/7**

| Atom | x           | y          | z           |
|------|-------------|------------|-------------|
| C    | 1.17047500  | 2.70558000 | -0.03193000 |
| C    | 1.19449700  | 4.09789300 | -0.09274500 |
| C    | -0.01272800 | 4.79468200 | -0.16185100 |
| C    | -1.22106500 | 4.09532200 | -0.13706700 |
| C    | -1.19630100 | 2.70388500 | -0.07564600 |
| N    | -0.01244200 | 2.04057100 | -0.06463400 |
| H    | -0.01286200 | 5.87686400 | -0.21034000 |
| H    | 2.13497800  | 4.63499100 | -0.07610500 |
| H    | -2.16268600 | 4.63045400 | -0.15358300 |
| C    | 2.30239800  | 1.79899900 | 0.13109900  |
| C    | -2.33253100 | 1.79492100 | 0.04722600  |

|   |             |             |             |
|---|-------------|-------------|-------------|
| N | -2.00449400 | 0.52842600  | 0.11643000  |
| N | 1.97306700  | 0.53143500  | 0.18467300  |
| C | -3.72822300 | 2.33797600  | 0.13656900  |
| H | -3.81319000 | 3.04248800  | 0.96880400  |
| H | -3.98682000 | 2.88619200  | -0.77446900 |
| H | -4.46200600 | 1.54923600  | 0.28123400  |
| C | 3.69438100  | 2.33952700  | 0.27195000  |
| H | 4.03218700  | 2.78262800  | -0.67028600 |
| H | 3.72747700  | 3.12779500  | 1.02813300  |
| H | 4.40195500  | 1.56367600  | 0.55463000  |
| C | -3.01624300 | -0.46630700 | 0.37718100  |
| C | -3.77520100 | -1.01502000 | -0.67126500 |
| C | -3.18543100 | -0.88446900 | 1.71024500  |
| C | -4.71175500 | -2.00346900 | -0.35408600 |
| C | -4.13317300 | -1.87495200 | 1.97624500  |
| C | -4.89091500 | -2.43523900 | 0.95457800  |
| H | -5.31053700 | -2.43431800 | -1.15015000 |
| H | -4.27744400 | -2.20528100 | 2.99984000  |
| H | -5.62336100 | -3.20312400 | 1.17828000  |
| C | 2.97107200  | -0.47427400 | 0.44932400  |
| C | 3.04511100  | -0.98643800 | 1.76071200  |
| C | 3.81347600  | -0.94505500 | -0.57329600 |
| C | 3.96033200  | -2.00735700 | 2.02018800  |
| C | 4.70950300  | -1.97445200 | -0.26430200 |
| C | 4.78161000  | -2.50839200 | 1.01534500  |
| H | 4.03063200  | -2.40955000 | 3.02564000  |
| H | 5.36307800  | -2.35263700 | -1.04425300 |
| H | 5.48253000  | -3.30678600 | 1.23324300  |
| C | 2.20517800  | -0.41692800 | 2.87739900  |
| H | 2.50226300  | 0.60850600  | 3.12116400  |
| H | 1.14281900  | -0.38173500 | 2.62340600  |
| H | 2.31265100  | -1.01088800 | 3.78562700  |
| C | 3.82421400  | -0.34997600 | -1.96066200 |
| H | 4.55881200  | 0.45951200  | -2.03502000 |
| H | 4.10892800  | -1.09807600 | -2.70285500 |
| H | 2.85929700  | 0.06235500  | -2.25020000 |
| C | -2.38313200 | -0.27529100 | 2.83286000  |
| H | -1.30730800 | -0.35628800 | 2.65369600  |
| H | -2.60210700 | 0.78928300  | 2.96375400  |
| H | -2.60164800 | -0.77112300 | 3.77914800  |
| C | -3.60442900 | -0.57894100 | -2.10554000 |
| H | -3.62611400 | 0.50761100  | -2.22210100 |
| H | -2.65407600 | -0.92569400 | -2.51931500 |

|    |             |             |             |
|----|-------------|-------------|-------------|
| H  | -4.40020500 | -0.98810900 | -2.72889700 |
| C  | -0.04085900 | -1.93472300 | 0.04343800  |
| H  | 0.61360100  | -1.93772700 | 0.91960000  |
| H  | -1.06598800 | -2.18371900 | 0.31721600  |
| C  | 0.47818100  | -2.78114300 | -1.01412800 |
| H  | 1.55821400  | -2.93526300 | -1.00542400 |
| H  | 0.46525900  | -2.00470300 | -2.13211200 |
| C  | -0.31222800 | -3.97381500 | -1.50048600 |
| H  | -0.25736200 | -4.77253200 | -0.75206100 |
| H  | -1.36915400 | -3.72906200 | -1.63254100 |
| H  | 0.07730800  | -4.37777700 | -2.43821000 |
| C  | 0.32816600  | -1.13752300 | -3.06535000 |
| H  | 1.28541400  | -1.27789900 | -3.56574700 |
| H  | -0.48407100 | -1.62613200 | -3.60449400 |
| C  | 0.05942300  | 0.14615100  | -2.46820100 |
| H  | -0.93150200 | 0.55379900  | -2.65493100 |
| H  | 0.83641200  | 0.89670700  | -2.60587900 |
| Fe | -0.00773500 | 0.14870300  | -0.26640600 |

**<sup>1</sup>Fe(+)-7**

| Atom | x           | y           | z           |
|------|-------------|-------------|-------------|
| C    | -1.25857400 | 2.56805300  | -0.12196200 |
| C    | -1.31212000 | 3.95474800  | -0.25243600 |
| C    | -0.12508100 | 4.68027000  | -0.32872700 |
| C    | 1.09267200  | 4.00305100  | -0.31591800 |
| C    | 1.10155100  | 2.61564600  | -0.18289800 |
| N    | -0.06179600 | 1.93254900  | -0.02628800 |
| H    | -0.14944900 | 5.75847100  | -0.43010600 |
| H    | -2.26775800 | 4.46083000  | -0.31002500 |
| H    | 2.02289900  | 4.54706000  | -0.42179400 |
| C    | -2.38716900 | 1.64348800  | -0.16553400 |
| C    | 2.26321900  | 1.73673000  | -0.26733400 |
| N    | 1.96757300  | 0.46298900  | -0.25625300 |
| N    | -2.03918900 | 0.38420000  | -0.19064800 |
| C    | 3.64091200  | 2.31336700  | -0.41342700 |
| H    | 3.67939700  | 3.00816600  | -1.25674100 |
| H    | 3.92246200  | 2.87754400  | 0.48070500  |
| H    | 4.38589300  | 1.53890300  | -0.57915400 |
| C    | -3.79303700 | 2.16339700  | -0.23889800 |
| H    | -4.03681100 | 2.74834800  | 0.65270900  |
| H    | -3.91512000 | 2.82523200  | -1.10098600 |
| H    | -4.51572000 | 1.35597600  | -0.32907000 |
| C    | 3.00191700  | -0.52330400 | -0.42716100 |
| C    | 3.80819500  | -0.92057600 | 0.65437100  |

|    |             |             |             |
|----|-------------|-------------|-------------|
| C  | 3.14323400  | -1.09842400 | -1.70573200 |
| C  | 4.75148400  | -1.92932800 | 0.43270400  |
| C  | 4.10275900  | -2.09798600 | -1.87774800 |
| C  | 4.89892800  | -2.51786100 | -0.81736400 |
| H  | 5.38026600  | -2.25039600 | 1.25714400  |
| H  | 4.22732200  | -2.54712000 | -2.85785000 |
| H  | 5.63627400  | -3.29893000 | -0.96712400 |
| C  | -3.03050900 | -0.64565500 | -0.36622000 |
| C  | -3.20047800 | -1.16172700 | -1.66712500 |
| C  | -3.76208500 | -1.14586300 | 0.72641400  |
| C  | -4.10245500 | -2.21198500 | -1.84868200 |
| C  | -4.64793400 | -2.20268300 | 0.49361700  |
| C  | -4.81607600 | -2.73776600 | -0.77747200 |
| H  | -4.24589500 | -2.61793500 | -2.84488600 |
| H  | -5.21693000 | -2.60331000 | 1.32657800  |
| H  | -5.50701000 | -3.55870900 | -0.93485800 |
| C  | -2.47081300 | -0.57203500 | -2.84993100 |
| H  | -2.85280700 | 0.42274700  | -3.10274900 |
| H  | -1.39953000 | -0.45388900 | -2.66527400 |
| H  | -2.59278700 | -1.19926300 | -3.73368600 |
| C  | -3.65543300 | -0.54728100 | 2.10758100  |
| H  | -2.63334700 | -0.28015600 | 2.37269300  |
| H  | -4.25578300 | 0.36540400  | 2.19204700  |
| H  | -4.02996700 | -1.24136900 | 2.86141700  |
| C  | 2.31722000  | -0.62231900 | -2.87521500 |
| H  | 1.24983900  | -0.58579900 | -2.64065600 |
| H  | 2.60233800  | 0.38869800  | -3.18473900 |
| H  | 2.45096400  | -1.27548700 | -3.73829600 |
| C  | 3.70567100  | -0.27288400 | 2.01324500  |
| H  | 4.24775100  | 0.67859500  | 2.04458700  |
| H  | 2.67468400  | -0.06389600 | 2.29746800  |
| H  | 4.14510300  | -0.91120600 | 2.78107400  |
| C  | 0.01022400  | -2.13758300 | -0.27222600 |
| H  | -0.85524800 | -1.96285600 | -0.90028000 |
| H  | 0.96034000  | -2.30596400 | -0.76725600 |
| C  | -0.14252600 | -2.44882400 | 1.03294000  |
| H  | -1.13883300 | -2.39087100 | 1.46586500  |
| H  | -0.78996000 | -0.93791100 | 3.51938600  |
| C  | 0.92324900  | -3.07117900 | 1.87840800  |
| H  | 0.70895100  | -4.14444800 | 1.95349500  |
| H  | 1.91551800  | -2.96300500 | 1.43872200  |
| H  | 0.93236100  | -2.68784000 | 2.89759900  |
| Fe | -0.01469700 | 0.10755900  | 0.34164700  |



|   |             |             |            |
|---|-------------|-------------|------------|
| C | -0.00886400 | -0.17325200 | 3.54166800 |
| H | -0.14938800 | 0.38375600  | 4.47748300 |
| H | 0.95015800  | -0.68679900 | 3.63380800 |
| C | -0.05356800 | 0.77482400  | 2.34882300 |
| H | 0.77777800  | 1.48600600  | 2.41315900 |
| H | -0.96905000 | 1.37637000  | 2.38254600 |

**<sup>1</sup>Fe(+)-8**

| Atom | x           | y           | z           |
|------|-------------|-------------|-------------|
| C    | 1.17757100  | 2.56068800  | -0.00653600 |
| C    | 1.20957600  | 3.95066400  | -0.10763700 |
| C    | -0.00000700 | 4.64636300  | -0.14941400 |
| C    | -1.20958900 | 3.95066100  | -0.10763800 |
| C    | -1.17758000 | 2.56068500  | -0.00653600 |
| N    | -0.00000400 | 1.90971100  | 0.05759700  |
| H    | -0.00000800 | 5.72695200  | -0.22890500 |
| H    | 2.15049000  | 4.48401600  | -0.16255600 |
| H    | -2.15050400 | 4.48401100  | -0.16255600 |
| C    | 2.32553100  | 1.63265200  | 0.00137400  |
| C    | -2.32553900 | 1.63264600  | 0.00137400  |
| N    | -2.00588500 | 0.37056100  | 0.03612000  |
| N    | 2.00587900  | 0.37056600  | 0.03611900  |
| C    | -3.72120700 | 2.17347400  | -0.05486800 |
| H    | -3.89799200 | 2.86132400  | 0.77721200  |
| H    | -3.87328800 | 2.74241100  | -0.97736000 |
| H    | -4.46448700 | 1.38135300  | -0.01374300 |
| C    | 3.72119800  | 2.17348000  | -0.05486800 |
| H    | 3.87328200  | 2.74240900  | -0.97736400 |
| H    | 3.89798000  | 2.86133800  | 0.77720700  |
| H    | 4.46447900  | 1.38136000  | -0.01373400 |
| C    | -3.03057900 | -0.64435200 | 0.02018900  |
| C    | -3.47323800 | -1.13707200 | -1.21801300 |
| C    | -3.51343800 | -1.14006000 | 1.24270200  |
| C    | -4.43050300 | -2.15465800 | -1.20785900 |
| C    | -4.47060700 | -2.15621100 | 1.19999500  |
| C    | -4.92631900 | -2.66217900 | -0.01244700 |
| H    | -4.78692000 | -2.55221300 | -2.15263800 |
| H    | -4.85910100 | -2.55422100 | 2.13178200  |
| H    | -5.66678500 | -3.45435300 | -0.02525500 |
| C    | 3.03057400  | -0.64434600 | 0.02018800  |
| C    | 3.51343700  | -1.14004900 | 1.24270100  |
| C    | 3.47323300  | -1.13706700 | -1.21801400 |
| C    | 4.47060700  | -2.15619900 | 1.19999500  |
| C    | 4.43049800  | -2.15465100 | -1.20785900 |

|    |             |             |             |
|----|-------------|-------------|-------------|
| C  | 4.92631700  | -2.66217000 | -0.01244600 |
| H  | 4.85910400  | -2.55420600 | 2.13178300  |
| H  | 4.78691500  | -2.55220900 | -2.15263800 |
| H  | 5.66678400  | -3.45434400 | -0.02525500 |
| C  | 3.03039600  | -0.59072800 | 2.56226200  |
| H  | 3.28972300  | 0.46513800  | 2.69103100  |
| H  | 1.94270200  | -0.66745300 | 2.66433700  |
| H  | 3.47441400  | -1.13637800 | 3.39523900  |
| C  | 2.95728600  | -0.57859800 | -2.52166400 |
| H  | 1.86698100  | -0.49687100 | -2.53249700 |
| H  | 3.35501900  | 0.42220800  | -2.72270000 |
| H  | 3.25079700  | -1.21320000 | -3.35842000 |
| C  | -3.03038900 | -0.59074700 | 2.56226300  |
| H  | -1.94269600 | -0.66749100 | 2.66433700  |
| H  | -3.28969800 | 0.46512300  | 2.69103300  |
| H  | -3.47441600 | -1.13639100 | 3.39523900  |
| C  | -2.95729400 | -0.57860000 | -2.52166200 |
| H  | -3.35501900 | 0.42221100  | -2.72269000 |
| H  | -1.86698800 | -0.49688200 | -2.53250000 |
| H  | -3.25081400 | -1.21319400 | -3.35842000 |
| C  | 0.00001400  | -2.01507600 | 0.44635400  |
| H  | 0.88485400  | -2.26869500 | 1.04395100  |
| H  | -0.88484000 | -2.26871800 | 1.04391800  |
| C  | 0.00004700  | -2.80513900 | -0.86360100 |
| H  | 0.88531500  | -2.59865700 | -1.47158300 |
| H  | -0.88519600 | -2.59866700 | -1.47162200 |
| H  | 0.00004900  | -3.88526800 | -0.67330600 |
| Fe | -0.00000200 | -0.04718400 | 0.23268600  |

**<sup>1</sup>Fe(+)-TS-3/9**

| Atom | x           | y          | z           |
|------|-------------|------------|-------------|
| C    | -1.13922000 | 2.56650900 | -0.08699000 |
| C    | -1.15995000 | 3.95121700 | -0.24155600 |
| C    | 0.04606600  | 4.64950900 | -0.24190600 |
| C    | 1.24287000  | 3.94350000 | -0.16362000 |
| C    | 1.20772700  | 2.55541800 | -0.01972800 |
| N    | 0.02659700  | 1.90822100 | 0.11325600  |
| H    | 0.05323200  | 5.72753800 | -0.35012200 |
| H    | -2.09656000 | 4.47743000 | -0.37399300 |
| H    | 2.18920900  | 4.46424600 | -0.23373300 |
| C    | -2.30255400 | 1.67058800 | -0.20163900 |
| C    | 2.37033100  | 1.65566600 | -0.10554900 |
| N    | 2.06620100  | 0.39700600 | -0.18825300 |
| N    | -2.01386000 | 0.40202900 | -0.21927600 |

|   |             |             |             |
|---|-------------|-------------|-------------|
| C | 3.75550800  | 2.23168200  | -0.16511600 |
| H | 3.82416800  | 2.98112700  | -0.95812000 |
| H | 4.01451600  | 2.73023000  | 0.77363300  |
| H | 4.49836000  | 1.46271500  | -0.36368000 |
| C | -3.67507000 | 2.25563800  | -0.35792900 |
| H | -3.96688600 | 2.81318200  | 0.53680000  |
| H | -3.69240300 | 2.96001600  | -1.19421300 |
| H | -4.42103200 | 1.48755500  | -0.54610900 |
| C | 3.06606800  | -0.62226300 | -0.28379800 |
| C | 3.88799800  | -0.94492100 | 0.81460800  |
| C | 3.13228200  | -1.34627100 | -1.49268400 |
| C | 4.77940200  | -2.01413200 | 0.67126100  |
| C | 4.04950500  | -2.39169500 | -1.58943200 |
| C | 4.86647600  | -2.73018300 | -0.51484200 |
| H | 5.41453400  | -2.28243300 | 1.50976000  |
| H | 4.12219000  | -2.94679900 | -2.51912900 |
| H | 5.56763100  | -3.55284700 | -0.60284600 |
| C | -3.04930100 | -0.58970100 | -0.29935700 |
| C | -3.14377300 | -1.33759300 | -1.48928100 |
| C | -3.87911600 | -0.85069800 | 0.80750300  |
| C | -4.10343000 | -2.34694600 | -1.55920600 |
| C | -4.81384400 | -1.88529800 | 0.69301300  |
| C | -4.93197900 | -2.62513100 | -0.47614500 |
| H | -4.19832600 | -2.92311400 | -2.47388900 |
| H | -5.45748600 | -2.10726700 | 1.53841200  |
| H | -5.66611900 | -3.42046800 | -0.54378000 |
| C | -2.25002800 | -1.04120500 | -2.66605200 |
| H | -2.40701400 | -0.03109900 | -3.05658300 |
| H | -1.19180400 | -1.11349600 | -2.39591100 |
| H | -2.43365200 | -1.74137400 | -3.48165500 |
| C | -3.80507300 | -0.05812300 | 2.09183300  |
| H | -2.79908800 | 0.30398400  | 2.31223300  |
| H | -4.46418700 | 0.81614400  | 2.06252500  |
| H | -4.13150100 | -0.66523000 | 2.93772300  |
| C | 2.27033100  | -0.97042100 | -2.67160400 |
| H | 1.21066200  | -0.91677800 | -2.40431800 |
| H | 2.53978800  | 0.01079800  | -3.07516700 |
| H | 2.37496800  | -1.69666800 | -3.47848400 |
| C | 3.85141300  | -0.18890100 | 2.12261100  |
| H | 4.58739900  | 0.62212000  | 2.13613100  |
| H | 2.87601100  | 0.25329700  | 2.33068800  |
| H | 4.10221700  | -0.84956600 | 2.95455500  |
| C | -0.12728400 | -2.06404000 | 0.50015300  |

|    |             |             |             |
|----|-------------|-------------|-------------|
| H  | -1.15147700 | -2.40096000 | 0.37426200  |
| H  | 0.58114200  | -2.40518600 | -0.25161100 |
| C  | 0.34574600  | -1.75269900 | 1.77794700  |
| H  | 0.53218600  | 0.01096300  | 1.86950900  |
| H  | 1.41681400  | -1.81835600 | 1.93891100  |
| C  | -0.49296300 | -1.92428300 | 3.02036400  |
| H  | -1.55343000 | -1.76253900 | 2.82436200  |
| H  | -0.37933100 | -2.95635700 | 3.36955900  |
| H  | -0.18063600 | -1.26465600 | 3.83113800  |
| Fe | -0.00982700 | 0.00045100  | 0.37792000  |

**<sup>1</sup>Fe(+)-9**

| Atom | x           | y           | z           |
|------|-------------|-------------|-------------|
| C    | 1.12850900  | 2.58646500  | 0.05678400  |
| C    | 1.14041300  | 3.97670500  | 0.16639200  |
| C    | -0.06763200 | 4.66888900  | 0.15744100  |
| C    | -1.26324200 | 3.95635300  | 0.09863500  |
| C    | -1.22200900 | 2.56720100  | -0.00655800 |
| N    | -0.03719800 | 1.91943600  | -0.10892500 |
| H    | -0.07892800 | 5.74937000  | 0.23599200  |
| H    | 2.07634700  | 4.51052400  | 0.27086300  |
| H    | -2.21221800 | 4.47474100  | 0.15046700  |
| C    | 2.29018000  | 1.69728000  | 0.16319300  |
| C    | -2.37259800 | 1.65762700  | 0.05439600  |
| N    | -2.05136000 | 0.39949600  | 0.13936400  |
| N    | 1.99300000  | 0.42975700  | 0.19597100  |
| C    | -3.76727900 | 2.20876200  | 0.06667500  |
| H    | -3.87684700 | 2.95558100  | 0.85769200  |
| H    | -3.99632700 | 2.70679400  | -0.88034300 |
| H    | -4.50555700 | 1.42787400  | 0.23296200  |
| C    | 3.66828700  | 2.27828900  | 0.27743800  |
| H    | 3.70616500  | 3.01059500  | 1.08846400  |
| H    | 4.41230200  | 1.51111800  | 0.47777700  |
| H    | 3.94886000  | 2.80144200  | -0.64158200 |
| C    | -3.05682500 | -0.62162600 | 0.21864500  |
| C    | -3.78379000 | -1.00587600 | -0.92415500 |
| C    | -3.23080400 | -1.26456500 | 1.46072500  |
| C    | -4.69282100 | -2.06112500 | -0.79332300 |
| C    | -4.15867500 | -2.30341000 | 1.54077400  |
| C    | -4.88304300 | -2.70472900 | 0.42274700  |
| H    | -5.25842100 | -2.37727900 | -1.66416000 |
| H    | -4.31332300 | -2.80166000 | 2.49237800  |
| H    | -5.59424200 | -3.51977500 | 0.50024400  |
| C    | 3.02398700  | -0.56523100 | 0.28203300  |

|    |             |             |             |
|----|-------------|-------------|-------------|
| C  | 3.14554200  | -1.27301600 | 1.49441300  |
| C  | 3.83187000  | -0.85955300 | -0.83277600 |
| C  | 4.10172700  | -2.28565600 | 1.57397500  |
| C  | 4.76611400  | -1.89328400 | -0.70574100 |
| C  | 4.90483900  | -2.60013700 | 0.48184200  |
| H  | 4.21607900  | -2.83266800 | 2.50424200  |
| H  | 5.39339800  | -2.14090900 | -1.55630800 |
| H  | 5.63746100  | -3.39617700 | 0.55763200  |
| C  | 2.29469300  | -0.92249700 | 2.68906200  |
| H  | 2.52904300  | 0.07429700  | 3.07606100  |
| H  | 1.22810600  | -0.91981600 | 2.44437800  |
| H  | 2.45011600  | -1.63365400 | 3.50109500  |
| C  | 3.73300300  | -0.10013100 | -2.13491900 |
| H  | 2.72125400  | 0.25109500  | -2.34269500 |
| H  | 4.39116100  | 0.77558600  | -2.13658300 |
| H  | 4.04700900  | -0.72706100 | -2.97097000 |
| C  | -2.47350300 | -0.81516600 | 2.68585300  |
| H  | -1.39739200 | -0.74037000 | 2.50280900  |
| H  | -2.80033600 | 0.17363000  | 3.02398700  |
| H  | -2.62526600 | -1.50866000 | 3.51373700  |
| C  | -3.62881600 | -0.31610300 | -2.25973000 |
| H  | -4.31011600 | 0.53710100  | -2.34935700 |
| H  | -2.61777700 | 0.05801700  | -2.43018400 |
| H  | -3.87586400 | -0.99791000 | -3.07528800 |
| C  | 0.01557200  | -2.14435100 | -0.15172200 |
| H  | 0.99797800  | -2.44091300 | 0.20087800  |
| H  | -0.80877800 | -2.24072300 | 0.54771600  |
| C  | -0.22678900 | -2.00147800 | -1.48509800 |
| H  | -0.04175800 | 0.40140800  | -1.90200400 |
| H  | -1.25776800 | -1.88791600 | -1.80814200 |
| C  | 0.76603400  | -2.28227900 | -2.57290500 |
| H  | 1.79082400  | -2.29729400 | -2.20147200 |
| H  | 0.55028000  | -3.27457200 | -2.98695500 |
| H  | 0.69041000  | -1.56751700 | -3.39304900 |
| Fe | -0.01710100 | 0.04541300  | -0.36806600 |

**<sup>1</sup>Fe(+)-10**

| Atom | x           | y          | z          |
|------|-------------|------------|------------|
| C    | -1.15317300 | 2.41713500 | 0.04565800 |
| C    | -1.18407000 | 3.80681400 | 0.04008500 |
| C    | 0.03528600  | 4.49699500 | 0.08233000 |
| C    | 1.24161600  | 3.80407800 | 0.12018600 |
| C    | 1.20297600  | 2.40477800 | 0.12178200 |
| N    | 0.02216200  | 1.77471200 | 0.09276500 |

|   |             |             |             |
|---|-------------|-------------|-------------|
| H | 0.03721200  | 5.58077000  | 0.07834100  |
| H | -2.11965200 | 4.35040200  | -0.00000300 |
| H | 2.18289900  | 4.33899900  | 0.14130700  |
| C | -2.31246200 | 1.47051500  | -0.01487700 |
| C | 2.33991000  | 1.45376500  | 0.12256800  |
| N | 1.99425200  | 0.19817600  | 0.07768100  |
| N | -2.00027000 | 0.21429600  | -0.02707900 |
| C | 3.74231600  | 1.97387200  | 0.17330600  |
| H | 3.96870700  | 2.56589800  | -0.71910900 |
| H | 3.87011200  | 2.63424500  | 1.03625700  |
| H | 4.46770100  | 1.16708000  | 0.24345300  |
| C | -3.70100600 | 2.02305500  | -0.06924700 |
| H | -3.81932300 | 2.66375000  | -0.94876400 |
| H | -4.44727600 | 1.23381100  | -0.11020300 |
| H | -3.89643900 | 2.64705200  | 0.80831300  |
| C | 2.98871300  | -0.84620100 | 0.02230100  |
| C | 3.23919100  | -1.58297500 | 1.19122300  |
| C | 3.61737400  | -1.13561400 | -1.19984000 |
| C | 4.18205600  | -2.60945100 | 1.12337500  |
| C | 4.54482200  | -2.18025100 | -1.21822000 |
| C | 4.83343900  | -2.90661500 | -0.06881200 |
| H | 4.39871600  | -3.18621800 | 2.01659800  |
| H | 5.03905400  | -2.42836800 | -2.15189500 |
| H | 5.55768500  | -3.71293900 | -0.10475700 |
| C | -3.01486800 | -0.81094900 | -0.08461000 |
| C | -3.38408900 | -1.31738400 | -1.33994000 |
| C | -3.54125700 | -1.30954100 | 1.11677200  |
| C | -4.33969000 | -2.33513700 | -1.37120600 |
| C | -4.49175000 | -2.32917400 | 1.03247400  |
| C | -4.89357000 | -2.83593800 | -0.19836300 |
| H | -4.64420800 | -2.74223500 | -2.32987900 |
| H | -4.91432900 | -2.73226600 | 1.94707500  |
| H | -5.63178900 | -3.62902100 | -0.24297500 |
| C | -2.75961800 | -0.79913000 | -2.61071400 |
| H | -2.97602200 | 0.26047400  | -2.78307500 |
| H | -1.66995200 | -0.90779500 | -2.59032400 |
| H | -3.12872600 | -1.34881100 | -3.47684800 |
| C | -3.08228600 | -0.78769200 | 2.45537100  |
| H | -2.00047500 | -0.90726700 | 2.58010700  |
| H | -3.30876500 | 0.27462800  | 2.59396600  |
| H | -3.56642100 | -1.32843700 | 3.26887200  |
| C | 3.29449700  | -0.37825600 | -2.46519600 |
| H | 2.21584900  | -0.29088100 | -2.62386200 |

|    |            |             |             |
|----|------------|-------------|-------------|
| H  | 3.70640500 | 0.63663300  | -2.46265800 |
| H  | 3.71291100 | -0.88715100 | -3.33392500 |
| C  | 2.50522000 | -1.28712700 | 2.47359800  |
| H  | 2.64736900 | -0.25548800 | 2.81040000  |
| H  | 1.42706000 | -1.44760900 | 2.35207900  |
| H  | 2.84287800 | -1.94275200 | 3.27673100  |
| H  | 0.02469600 | -1.72980400 | 0.06468900  |
| Fe | 0.01744800 | -0.17632400 | 0.10678800  |

**<sup>2</sup>Fe(+)****<sup>2</sup>Fe(+)-1**

| Atom | x           | y           | z           |
|------|-------------|-------------|-------------|
| C    | 1.16956000  | 2.43390000  | 0.11743100  |
| C    | 1.20659700  | 3.82339900  | 0.25057700  |
| C    | 0.00097100  | 4.51904700  | 0.29785300  |
| C    | -1.20435800 | 3.82415500  | 0.23379600  |
| C    | -1.16597200 | 2.43468400  | 0.10149200  |
| N    | 0.00215600  | 1.78943900  | 0.01873900  |
| H    | 0.00064200  | 5.59847200  | 0.39725400  |
| H    | 2.14703400  | 4.35433200  | 0.31940200  |
| H    | -2.14543000 | 4.35551200  | 0.28972200  |
| C    | 2.37579300  | 1.54560000  | 0.10796600  |
| C    | -2.37236300 | 1.54685000  | 0.07752700  |
| N    | -2.12978800 | 0.28471000  | 0.08248500  |
| N    | 2.13179200  | 0.28362400  | 0.10013600  |
| C    | -3.73295300 | 2.17759400  | 0.09316000  |
| H    | -3.85291300 | 2.80149000  | 0.98404600  |
| H    | -3.87124100 | 2.82765200  | -0.77578100 |
| H    | -4.51889900 | 1.42642300  | 0.09460200  |
| C    | 3.73595800  | 2.17536200  | 0.15736900  |
| H    | 3.89991300  | 2.82109500  | -0.71033700 |
| H    | 3.83118100  | 2.80342500  | 1.04825200  |
| H    | 4.52050100  | 1.42319500  | 0.18482400  |
| C    | -3.17789000 | -0.69871200 | 0.06865400  |
| C    | -3.81958300 | -1.02161700 | -1.13981900 |
| C    | -3.45816100 | -1.37177600 | 1.27025000  |
| C    | -4.78565300 | -2.03047200 | -1.11029100 |
| C    | -4.43867300 | -2.36492500 | 1.24870800  |
| C    | -5.10015500 | -2.69324900 | 0.07052300  |
| H    | -5.29111600 | -2.30076000 | -2.03168900 |
| H    | -4.67872500 | -2.88905100 | 2.16808900  |
| H    | -5.85377100 | -3.47298800 | 0.07046400  |
| C    | 3.17437000  | -0.70398600 | 0.08838200  |
| C    | 3.39331300  | -1.43073600 | 1.27211400  |

|    |             |             |             |
|----|-------------|-------------|-------------|
| C  | 3.87000900  | -0.98291900 | -1.10156900 |
| C  | 4.36780300  | -2.42925500 | 1.25565900  |
| C  | 4.82637600  | -2.00099800 | -1.06872200 |
| C  | 5.08166400  | -2.71407200 | 0.09665800  |
| H  | 4.56167500  | -2.99246700 | 2.16272900  |
| H  | 5.37120800  | -2.23881000 | -1.97655200 |
| H  | 5.82928900  | -3.49956100 | 0.09893400  |
| C  | 2.60955100  | -1.13452800 | 2.52612100  |
| H  | 2.78012900  | -0.11711800 | 2.89206400  |
| H  | 1.53095700  | -1.23728000 | 2.36110800  |
| H  | 2.88416700  | -1.82053900 | 3.32784800  |
| C  | 3.59185100  | -0.24049800 | -2.38610100 |
| H  | 2.52109400  | -0.17519600 | -2.59662600 |
| H  | 3.98517300  | 0.78152400  | -2.37069100 |
| H  | 4.06069200  | -0.74702200 | -3.23011500 |
| C  | -2.73105700 | -1.02936500 | 2.54661700  |
| H  | -1.64663500 | -1.13999300 | 2.43575000  |
| H  | -2.91480900 | 0.00133800  | 2.86632100  |
| H  | -3.04489300 | -1.68364000 | 3.36038800  |
| C  | -3.47171700 | -0.33168900 | -2.43630600 |
| H  | -3.80695400 | 0.71071100  | -2.45734900 |
| H  | -2.39336000 | -0.33152200 | -2.61925700 |
| H  | -3.94682900 | -0.83507200 | -3.27865600 |
| C  | 0.02933400  | -2.06618700 | -1.35056500 |
| H  | 0.39154900  | -1.92213700 | -2.37371800 |
| H  | 0.69513500  | -2.79148700 | -0.86880300 |
| H  | -0.96417800 | -2.52158000 | -1.41107600 |
| Fe | 0.00163900  | -0.35027000 | -0.28829100 |

**<sup>2</sup>Fe(+)-2**

| Atom | x           | y          | z           |
|------|-------------|------------|-------------|
| C    | 1.16911000  | 2.40603800 | -0.27191200 |
| C    | 1.21109400  | 3.79750900 | -0.35879700 |
| C    | 0.01388700  | 4.50794600 | -0.31936200 |
| C    | -1.18678600 | 3.81689500 | -0.22053500 |
| C    | -1.15929000 | 2.42042400 | -0.13767300 |
| N    | 0.00373800  | 1.75180400 | -0.14563800 |
| H    | 0.01903400  | 5.59035000 | -0.37734000 |
| H    | 2.15288200  | 4.32111400 | -0.45574600 |
| H    | -2.12603400 | 4.35378500 | -0.21100400 |
| C    | 2.38886900  | 1.53954300 | -0.33300100 |
| C    | -2.38885700 | 1.57562200 | -0.09515600 |
| N    | -2.20046900 | 0.31680800 | 0.07737600  |
| N    | 2.19572900  | 0.28474500 | -0.14803300 |



|   |             |             |             |
|---|-------------|-------------|-------------|
| C | -3.72197300 | 2.24351100  | -0.29034700 |
| H | -3.91138500 | 2.96310300  | 0.51224800  |
| H | -3.75242400 | 2.79679800  | -1.23312200 |
| H | -4.53056900 | 1.51683400  | -0.29017200 |
| C | 3.71269200  | 2.18446600  | -0.62857500 |
| H | 3.65359000  | 2.78654700  | -1.53930400 |
| H | 4.00878000  | 2.85581400  | 0.18341400  |
| H | 4.49453300  | 1.43958600  | -0.75650100 |
| C | -3.29814800 | -0.61078500 | -0.02611700 |
| C | -3.66551000 | -1.06138100 | -1.30875400 |
| C | -3.93317500 | -1.08688500 | 1.13267300  |
| C | -4.67946700 | -2.01610000 | -1.40448600 |
| C | -4.94962500 | -2.03452400 | 0.98265500  |
| C | -5.31901400 | -2.50397900 | -0.27112900 |
| H | -4.96955700 | -2.37746700 | -2.38582800 |
| H | -5.45611000 | -2.40500100 | 1.86823400  |
| H | -6.10598000 | -3.24406100 | -0.36552400 |
| C | 3.27540900  | -0.66386200 | -0.18559500 |
| C | 4.11996100  | -0.82277400 | 0.92804700  |
| C | 3.40857300  | -1.46248900 | -1.33835300 |
| C | 5.08902400  | -1.83033000 | 0.87514400  |
| C | 4.40096900  | -2.44254600 | -1.34608400 |
| C | 5.23016800  | -2.63663400 | -0.24598500 |
| H | 5.74288700  | -1.97418900 | 1.72954500  |
| H | 4.52092400  | -3.06233800 | -2.22866200 |
| H | 5.98763000  | -3.41238800 | -0.26601200 |
| C | 4.04811100  | 0.06927400  | 2.14560800  |
| H | 4.69673000  | 0.94541800  | 2.03555300  |
| H | 3.04225300  | 0.43951500  | 2.34699400  |
| H | 4.38865500  | -0.46147700 | 3.03614300  |
| C | 2.53949900  | -1.24018500 | -2.55068900 |
| H | 1.47668100  | -1.30977800 | -2.30675600 |
| H | 2.70788700  | -0.25386800 | -2.99627100 |
| H | 2.75031700  | -1.98377300 | -3.31983700 |
| C | -3.55788000 | -0.61100500 | 2.51492000  |
| H | -2.65222700 | -1.10763700 | 2.87773500  |
| H | -3.38258800 | 0.46689100  | 2.55727000  |
| H | -4.35042100 | -0.83940100 | 3.22865000  |
| C | -3.00598700 | -0.52966000 | -2.55797000 |
| H | -3.29807200 | 0.50520200  | -2.76858100 |
| H | -1.91606500 | -0.55070400 | -2.48634000 |
| H | -3.29216600 | -1.12335800 | -3.42673300 |
| C | -0.30982000 | -2.31865500 | -0.49347400 |

|    |             |             |             |
|----|-------------|-------------|-------------|
| H  | -0.59155100 | -2.37667800 | -1.55026900 |
| H  | 0.60061300  | -2.91539200 | -0.36437900 |
| H  | -1.10911800 | -2.81149000 | 0.07096200  |
| C  | 0.48223600  | -1.16448700 | 2.43023600  |
| H  | 1.52522200  | -1.43198700 | 2.30572900  |
| H  | -0.21539700 | -1.99407200 | 2.47079100  |
| C  | 0.08626100  | 0.10135600  | 2.66065600  |
| H  | -0.93992700 | 0.34661300  | 2.89992000  |
| H  | 0.79778300  | 0.91929600  | 2.70384600  |
| Fe | 0.00147000  | -0.41704400 | 0.16537500  |

**<sup>2</sup>Fe(+)-TS-2/3**

| Atom | x           | y           | z           |
|------|-------------|-------------|-------------|
| C    | 1.17218400  | 2.51798700  | 0.04555500  |
| C    | 1.20765000  | 3.91337800  | 0.05886200  |
| C    | 0.00571400  | 4.61514400  | 0.05434000  |
| C    | -1.19751500 | 3.91571400  | 0.04820200  |
| C    | -1.16474700 | 2.52016800  | 0.03521100  |
| N    | 0.00315000  | 1.85614500  | 0.02722700  |
| H    | 0.00673600  | 5.69903700  | 0.06070400  |
| H    | 2.15024900  | 4.44468900  | 0.07276200  |
| H    | -2.13912700 | 4.44891700  | 0.05391000  |
| C    | 2.38635200  | 1.65257300  | 0.07356100  |
| C    | -2.38079800 | 1.65723600  | 0.05501200  |
| N    | -2.16298200 | 0.39231400  | -0.01288700 |
| N    | 2.16631800  | 0.38824800  | 0.00266300  |
| C    | -3.72981300 | 2.30744000  | 0.16969900  |
| H    | -3.78838900 | 2.92741000  | 1.06892500  |
| H    | -3.91774000 | 2.96250400  | -0.68634500 |
| H    | -4.52386400 | 1.56547600  | 0.21162900  |
| C    | 3.73608700  | 2.29944900  | 0.19713800  |
| H    | 3.93752000  | 2.94210700  | -0.66533400 |
| H    | 3.78529000  | 2.93117500  | 1.08860200  |
| H    | 4.52663000  | 1.55515000  | 0.25910100  |
| C    | -3.23930300 | -0.55881000 | 0.04738800  |
| C    | -3.84729900 | -0.99067200 | -1.14488800 |
| C    | -3.61115200 | -1.07742800 | 1.30182600  |
| C    | -4.81399000 | -1.99617900 | -1.05912300 |
| C    | -4.58271100 | -2.08084700 | 1.33368000  |
| C    | -5.17401400 | -2.54719400 | 0.16514400  |
| H    | -5.29244900 | -2.34385300 | -1.96926400 |
| H    | -4.87929400 | -2.49570600 | 2.29178000  |
| H    | -5.92169800 | -3.33144800 | 0.20958700  |
| C    | 3.24027200  | -0.56600200 | 0.05872400  |

|    |             |             |             |
|----|-------------|-------------|-------------|
| C  | 3.59020000  | -1.11157800 | 1.30844100  |
| C  | 3.86737600  | -0.97427300 | -1.13177600 |
| C  | 4.55718600  | -2.11902500 | 1.33560200  |
| C  | 4.82760700  | -1.98683700 | -1.05079800 |
| C  | 5.16491700  | -2.56471200 | 0.16706900  |
| H  | 4.83747200  | -2.55378300 | 2.28977300  |
| H  | 5.31902500  | -2.31827700 | -1.96016800 |
| H  | 5.90802800  | -3.35352800 | 0.20740400  |
| C  | 2.99947500  | -0.58818300 | 2.59585500  |
| H  | 3.45465300  | 0.36695600  | 2.88122700  |
| H  | 1.92291000  | -0.41876300 | 2.52672000  |
| H  | 3.17784400  | -1.28341100 | 3.41729900  |
| C  | 3.58339500  | -0.30837300 | -2.45700000 |
| H  | 2.53962600  | -0.01428500 | -2.56811900 |
| H  | 4.18846400  | 0.59735100  | -2.57942500 |
| H  | 3.83516900  | -0.96944200 | -3.28782700 |
| C  | -3.03742100 | -0.53288300 | 2.58822900  |
| H  | -1.96082300 | -0.35997600 | 2.52909100  |
| H  | -3.49973600 | 0.42425800  | 2.85481400  |
| H  | -3.22252300 | -1.21689400 | 3.41755700  |
| C  | -3.53155100 | -0.35392100 | -2.47676900 |
| H  | -4.06106800 | 0.59835100  | -2.59557400 |
| H  | -2.46869700 | -0.14624200 | -2.60317600 |
| H  | -3.84765200 | -0.99600600 | -3.30020800 |
| C  | -0.06637800 | -2.65822400 | -0.35165100 |
| H  | 0.81020400  | -3.14406600 | -0.75906000 |
| H  | -1.00708700 | -3.04213200 | -0.72351900 |
| C  | -0.01735100 | -2.13584400 | 0.95925000  |
| H  | -0.92647200 | -2.15996600 | 1.54979400  |
| H  | 0.91405000  | -2.22290500 | 1.50774700  |
| Fe | 0.00318600  | -0.28475700 | -0.10899300 |
| C  | 0.03449800  | -1.32011200 | -2.05851700 |
| H  | -0.80885000 | -1.78727000 | -2.55824800 |
| H  | -0.02083800 | -0.23459200 | -2.27388100 |
| H  | 0.97099300  | -1.69206100 | -2.46308500 |

**<sup>2</sup>Fe(+)-3**

| Atom | x           | y          | z          |
|------|-------------|------------|------------|
| C    | 1.10750400  | 2.71721900 | 0.07080500 |
| C    | 1.12220300  | 4.11342800 | 0.05728200 |
| C    | -0.09483000 | 4.79153700 | 0.06804500 |
| C    | -1.29033700 | 4.07668900 | 0.05738700 |
| C    | -1.23233000 | 2.68147000 | 0.07173000 |
| N    | -0.05232700 | 2.05060900 | 0.12517600 |

|   |             |             |             |
|---|-------------|-------------|-------------|
| H | -0.11136000 | 5.87541500  | 0.06153400  |
| H | 2.05376400  | 4.66351100  | 0.03134000  |
| H | -2.23835600 | 4.59793700  | 0.03126300  |
| C | 2.32019200  | 1.84665000  | -0.02877400 |
| C | -2.41642200 | 1.77380700  | -0.02652500 |
| N | -2.13877600 | 0.52260400  | -0.15942800 |
| N | 2.08270000  | 0.58897100  | -0.17123700 |
| C | -3.79080900 | 2.37446200  | -0.02761100 |
| H | -4.00349400 | 2.86963700  | 0.92463800  |
| H | -3.87277900 | 3.13400800  | -0.81046200 |
| H | -4.55402400 | 1.62032700  | -0.20405300 |
| C | 3.67419400  | 2.49278000  | -0.02178300 |
| H | 3.73477800  | 3.25615500  | -0.80293100 |
| H | 3.86555700  | 2.99302500  | 0.93235400  |
| H | 4.46323500  | 1.76519400  | -0.19591000 |
| C | -3.14547400 | -0.49175000 | -0.25803700 |
| C | -3.24804500 | -1.17390400 | -1.48647800 |
| C | -3.91948100 | -0.85453900 | 0.86019500  |
| C | -4.18176700 | -2.20362800 | -1.59235000 |
| C | -4.82821300 | -1.90612800 | 0.70677800  |
| C | -4.96878700 | -2.57004900 | -0.50499500 |
| H | -4.28717200 | -2.72709000 | -2.53704700 |
| H | -5.42872500 | -2.20806800 | 1.55887400  |
| H | -5.68270900 | -3.38076400 | -0.60007700 |
| C | 3.12503700  | -0.38809100 | -0.27265000 |
| C | 3.90228200  | -0.73524900 | 0.84834300  |
| C | 3.26489000  | -1.05110800 | -1.50785100 |
| C | 4.84803300  | -1.75341600 | 0.69301800  |
| C | 4.23371600  | -2.04777500 | -1.61495600 |
| C | 5.02204800  | -2.39986600 | -0.52380900 |
| H | 5.45150600  | -2.04263600 | 1.54748200  |
| H | 4.36594800  | -2.55656200 | -2.56430100 |
| H | 5.76401600  | -3.18483600 | -0.62032300 |
| C | 3.73910100  | -0.06729600 | 2.19286100  |
| H | 4.32126900  | 0.85772500  | 2.26365600  |
| H | 2.69904500  | 0.18242300  | 2.41165900  |
| H | 4.09221400  | -0.72289300 | 2.98979500  |
| C | 2.41052100  | -0.67696600 | -2.69253300 |
| H | 1.34159400  | -0.75501900 | -2.46278000 |
| H | 2.58734200  | 0.35165700  | -3.02170700 |
| H | 2.61088400  | -1.33241900 | -3.54058300 |
| C | -3.78625400 | -0.17106600 | 2.20011200  |
| H | -2.75302300 | 0.09694000  | 2.43060200  |

|    |             |             |             |
|----|-------------|-------------|-------------|
| H  | -4.38371600 | 0.74519100  | 2.25460100  |
| H  | -4.13991200 | -0.82485300 | 2.99820800  |
| C  | -2.39157000 | -0.78645300 | -2.66580100 |
| H  | -2.58216500 | 0.23839000  | -2.99838000 |
| H  | -1.32190400 | -0.84824800 | -2.43140600 |
| H  | -2.57435200 | -1.44692300 | -3.51390300 |
| C  | 0.03564400  | -1.68811600 | 1.47908500  |
| H  | 0.81272300  | -1.53419000 | 2.23997700  |
| H  | -0.91850800 | -1.73640200 | 2.02072200  |
| Fe | -0.02718700 | -0.08556400 | 0.24478900  |
| C  | 0.28215400  | -3.01126200 | 0.73228100  |
| H  | 1.23681700  | -2.96875300 | 0.19424500  |
| H  | -0.49086600 | -3.16047300 | -0.03317500 |
| C  | 0.29337800  | -4.23711100 | 1.65732200  |
| H  | 1.07916900  | -4.15071700 | 2.41362200  |
| H  | -0.66026700 | -4.34257300 | 2.18288500  |
| H  | 0.46966200  | -5.16035500 | 1.09695300  |

**<sup>2</sup>Fe(+)-4**

| Atom | x           | y           | z           |
|------|-------------|-------------|-------------|
| Fe   | -0.05268300 | -0.18170800 | 0.22486200  |
| N    | -0.17140800 | 1.97715700  | -0.16930800 |
| C    | -1.36812700 | 2.57146800  | -0.30622900 |
| C    | -2.54511200 | 1.64831700  | -0.33364700 |
| N    | -2.29323000 | 0.40888100  | -0.11975300 |
| C    | -3.32809600 | -0.58889600 | -0.15151600 |
| C    | -3.46041000 | -1.36249900 | -1.32096400 |
| C    | -2.65854600 | -1.05467300 | -2.56128400 |
| H    | -2.80231200 | -1.82702400 | -3.31746100 |
| C    | -4.39860500 | -2.39506800 | -1.32130200 |
| C    | -5.17970100 | -2.65854500 | -0.20075400 |
| C    | -5.04808900 | -1.86852000 | 0.93328800  |
| C    | -4.13103900 | -0.81333100 | 0.98076500  |
| C    | -4.08057500 | 0.07004600  | 2.20560200  |
| H    | -3.09186000 | 0.49093500  | 2.39084800  |
| H    | -5.66972900 | -2.06292400 | 1.80168700  |
| H    | -4.51523400 | -2.99929900 | -2.21510500 |
| C    | -3.90153800 | 2.22230500  | -0.63048000 |
| H    | -4.20764900 | 2.91976700  | 0.15520800  |
| H    | -3.88918000 | 2.78066600  | -1.57051000 |
| H    | -4.65348800 | 1.44018100  | -0.70314300 |
| C    | -1.47874400 | 3.95544900  | -0.43955400 |
| C    | -0.31826900 | 4.72516100  | -0.43796100 |
| C    | 0.91495300  | 4.09622700  | -0.33070200 |

|   |             |             |             |
|---|-------------|-------------|-------------|
| C | 0.95665400  | 2.70355200  | -0.19927000 |
| C | 2.22757300  | 1.92672600  | -0.14324600 |
| N | 2.11179400  | 0.66451300  | 0.07228100  |
| C | 3.26543500  | -0.19499600 | -0.01387600 |
| C | 3.65470900  | -0.65839900 | -1.28546000 |
| C | 4.72425100  | -1.55312900 | -1.35962500 |
| C | 5.39924300  | -1.96542600 | -0.21692700 |
| C | 5.01143600  | -1.47817400 | 1.02470600  |
| C | 3.93864000  | -0.59183000 | 1.15386000  |
| H | 5.54699100  | -1.78735900 | 1.91664200  |
| H | 5.03154200  | -1.92486200 | -2.33184000 |
| C | 3.52120500  | 2.65908000  | -0.37388000 |
| H | 3.67379800  | 3.41935500  | 0.39836700  |
| H | 4.36963800  | 1.97996600  | -0.35085100 |
| H | 3.51623800  | 3.17554900  | -1.33774600 |
| H | 1.82728400  | 4.67713400  | -0.35200300 |
| H | -0.37707500 | 5.80334900  | -0.53258700 |
| H | -2.44611500 | 4.42847500  | -0.54440500 |
| H | 6.22916900  | -2.65902600 | -0.29476500 |
| C | 3.54509300  | -0.09144200 | 2.52211200  |
| H | 3.33845400  | 0.98186400  | 2.53407900  |
| H | -5.89475000 | -3.47366400 | -0.21563500 |
| C | 2.97057300  | -0.19367000 | -2.54854000 |
| H | 3.26468200  | -0.81354900 | -3.39616500 |
| C | 0.23407300  | -2.07836100 | -0.49827400 |
| H | -0.78360800 | -2.46237400 | -0.66012000 |
| H | 0.67225800  | -1.96791300 | -1.50088300 |
| H | -1.58770800 | -0.98952300 | -2.35597200 |
| H | -2.96096200 | -0.10176800 | -3.00950100 |
| H | -4.37779400 | -0.48313000 | 3.09801400  |
| H | -4.77439500 | 0.91319900  | 2.11286500  |
| H | 4.34252900  | -0.27604400 | 3.24286700  |
| H | 2.65353300  | -0.60360000 | 2.89767800  |
| H | 3.23848600  | 0.83846800  | -2.80090600 |
| H | 1.88222300  | -0.23501200 | -2.46918500 |
| C | 1.22705700  | -4.44481400 | -0.46725500 |
| C | 1.04006400  | -3.12166200 | 0.28837700  |
| H | 1.78919200  | -5.17131400 | 0.12777300  |
| H | 1.77312700  | -4.28974700 | -1.40263800 |
| H | 0.26269700  | -4.89614700 | -0.71955100 |
| H | 2.02834800  | -2.72737600 | 0.54928600  |
| H | 0.53798000  | -3.33850200 | 1.23950200  |
| C | -0.43297300 | -0.78715000 | 2.50557800  |

|   |             |             |            |
|---|-------------|-------------|------------|
| C | -0.12832400 | 0.51817000  | 2.65054600 |
| H | -1.45489300 | -1.14165600 | 2.43694300 |
| H | 0.32679400  | -1.55631000 | 2.58957600 |
| H | -0.89725700 | 1.28331600  | 2.66694000 |
| H | 0.88185300  | 0.85096800  | 2.84922500 |

**<sup>2</sup>Fe(+)-TS-4/5**

| Atom | x           | y           | z           |
|------|-------------|-------------|-------------|
| C    | 1.14132100  | 2.60994100  | -0.29078900 |
| C    | 1.16055400  | 3.99897300  | -0.42146300 |
| C    | -0.04734400 | 4.68922400  | -0.46286500 |
| C    | -1.24286900 | 3.97890200  | -0.39396900 |
| C    | -1.19867400 | 2.59041600  | -0.26628500 |
| N    | -0.02243900 | 1.93682200  | -0.20608200 |
| H    | -0.05746000 | 5.76884600  | -0.55692800 |
| H    | 2.09730400  | 4.53593100  | -0.49216900 |
| H    | -2.18921800 | 4.50113900  | -0.44353500 |
| C    | 2.36560400  | 1.76619200  | -0.25773300 |
| C    | -2.40962200 | 1.72671500  | -0.21908500 |
| N    | -2.20746600 | 0.47723900  | 0.02020500  |
| N    | 2.18585500  | 0.51843700  | 0.01010000  |
| C    | -3.75109000 | 2.36160000  | -0.46166100 |
| H    | -3.96980000 | 3.10262800  | 0.31347100  |
| H    | -3.77132200 | 2.88472500  | -1.42151000 |
| H    | -4.54806200 | 1.62228100  | -0.45366600 |
| C    | 3.69253300  | 2.41512400  | -0.53856600 |
| H    | 3.68275000  | 2.93065300  | -1.50266700 |
| H    | 3.92133300  | 3.16515500  | 0.22502100  |
| H    | 4.49854100  | 1.68568000  | -0.54388400 |
| C    | -3.30167800 | -0.45874400 | -0.03530400 |
| C    | -3.63606400 | -1.01184500 | -1.28879600 |
| C    | -3.98398900 | -0.83232800 | 1.13589500  |
| C    | -4.62753600 | -1.99351300 | -1.33505800 |
| C    | -4.97564200 | -1.81381600 | 1.03420900  |
| C    | -5.28821800 | -2.40407700 | -0.18276200 |
| H    | -4.88945200 | -2.43148900 | -2.29298500 |
| H    | -5.51452300 | -2.10750400 | 1.92964600  |
| H    | -6.05715200 | -3.16681100 | -0.23739800 |
| C    | 3.29404500  | -0.40011100 | -0.02776300 |
| C    | 3.98045200  | -0.72669500 | 1.15476200  |
| C    | 3.62811700  | -0.99210500 | -1.26192000 |
| C    | 4.99654700  | -1.68468200 | 1.08133600  |
| C    | 4.64460700  | -1.94923300 | -1.28070300 |
| C    | 5.32276500  | -2.30158200 | -0.11928300 |

|    |             |             |             |
|----|-------------|-------------|-------------|
| H  | 5.54051100  | -1.94191500 | 1.98477700  |
| H  | 4.91121800  | -2.41496600 | -2.22410000 |
| H  | 6.11149500  | -3.04504700 | -0.15317600 |
| C  | 3.66465200  | -0.07805600 | 2.48110600  |
| H  | 4.52526700  | -0.13384800 | 3.14924100  |
| H  | 3.39290900  | 0.97464000  | 2.38272100  |
| H  | 2.83538700  | -0.57947800 | 2.98913800  |
| C  | 2.94343600  | -0.59063600 | -2.54617900 |
| H  | 1.85471700  | -0.59957000 | -2.45910500 |
| H  | 3.22877000  | 0.41906500  | -2.86094200 |
| H  | 3.21709400  | -1.26584900 | -3.35758500 |
| C  | -3.71543300 | -0.19698400 | 2.47964200  |
| H  | -2.94235300 | -0.73085900 | 3.03985900  |
| H  | -3.39736000 | 0.84370800  | 2.39820600  |
| H  | -4.61670300 | -0.21514600 | 3.09460700  |
| C  | -2.99110100 | -0.53388300 | -2.56786800 |
| H  | -3.38773100 | 0.43968100  | -2.87713700 |
| H  | -1.90936300 | -0.42212700 | -2.47776600 |
| H  | -3.18860100 | -1.22967200 | -3.38430600 |
| C  | 0.36575100  | -2.30145600 | 0.47179700  |
| H  | 1.45722800  | -2.29758000 | 0.45988000  |
| H  | 0.03915300  | -3.19955800 | 0.99167200  |
| C  | -0.23524200 | -2.31662500 | -0.93851600 |
| H  | -0.01674700 | -1.39329700 | -1.49855600 |
| H  | -1.32302000 | -2.38943300 | -0.87919600 |
| C  | 0.30654300  | -3.49694600 | -1.76725400 |
| H  | 1.39238500  | -3.44354900 | -1.87486900 |
| H  | 0.06575000  | -4.44776100 | -1.28530500 |
| H  | -0.13489700 | -3.50718700 | -2.76824600 |
| C  | -0.08854300 | -1.42123300 | 2.42936000  |
| H  | 0.77027800  | -2.00468100 | 2.73713400  |
| H  | -1.02674400 | -1.95849900 | 2.49639500  |
| C  | -0.08666000 | -0.02265600 | 2.64296200  |
| H  | -1.01706400 | 0.47696200  | 2.88408200  |
| H  | 0.81163200  | 0.44857800  | 3.02598600  |
| Fe | 0.01341800  | -0.04079300 | 0.52654500  |

**<sup>2</sup>Fe(+)-5**

| Atom | x           | y           | z           |
|------|-------------|-------------|-------------|
| C    | 1.13042600  | -3.09187900 | -0.23269200 |
| C    | 1.15134000  | -4.48546300 | -0.31839200 |
| C    | -0.06260800 | -5.16658400 | -0.37569800 |
| C    | -1.26115700 | -4.45938600 | -0.31511300 |
| C    | -1.20942500 | -3.06644100 | -0.22997700 |



|   |             |             |             |
|---|-------------|-------------|-------------|
| N | -0.03234300 | -2.42772900 | -0.23713400 |
| H | -0.07442800 | -6.24831100 | -0.44528500 |
| H | 2.08541600  | -5.03175000 | -0.33290500 |
| H | -2.20691600 | -4.98528900 | -0.32691800 |
| C | 2.33966500  | -2.22541000 | -0.07805800 |
| C | -2.39831000 | -2.17374400 | -0.07289600 |
| N | -2.12800000 | -0.93494100 | 0.15536100  |
| N | 2.09769800  | -0.98226100 | 0.15564800  |
| C | -3.76964800 | -2.77908900 | -0.12978900 |
| H | -3.96813700 | -3.20947400 | -1.11591100 |
| H | -3.85682100 | -3.59068400 | 0.59845100  |
| H | -4.53920100 | -2.04254700 | 0.08854100  |
| C | 3.69663000  | -2.86220700 | -0.14239000 |
| H | 3.76918000  | -3.67590000 | 0.58515500  |
| H | 3.88011100  | -3.29654700 | -1.12970800 |
| H | 4.48407200  | -2.14376800 | 0.07229600  |
| C | -3.14334800 | 0.06331600  | 0.31525400  |
| C | -3.27609300 | 0.64471200  | 1.59122100  |
| C | -3.89679100 | 0.50911600  | -0.78699300 |
| C | -4.21841400 | 1.65868800  | 1.75812100  |
| C | -4.81616700 | 1.53988600  | -0.57024300 |
| C | -4.98565200 | 2.10572900  | 0.68696900  |
| H | -4.34645700 | 2.10543100  | 2.73875100  |
| H | -5.40162500 | 1.90451300  | -1.40815800 |
| H | -5.70712500 | 2.90245900  | 0.83085500  |
| C | 3.13727400  | -0.00953400 | 0.31557600  |
| C | 3.89481100  | 0.42417000  | -0.78876700 |
| C | 3.29340900  | 0.56001000  | 1.59417100  |
| C | 4.84049400  | 1.43089000  | -0.57232400 |
| C | 4.26096100  | 1.55015900  | 1.76042300  |
| C | 5.03164000  | 1.98524400  | 0.68689300  |
| H | 5.42964700  | 1.78564300  | -1.41190500 |
| H | 4.40652200  | 1.98736000  | 2.74292600  |
| H | 5.77333300  | 2.76322700  | 0.83064800  |
| C | 3.70606200  | -0.14025100 | -2.17667200 |
| H | 4.24582900  | -1.08301600 | -2.31494800 |
| H | 2.65566600  | -0.32674900 | -2.41083900 |
| H | 4.08886000  | 0.55372600  | -2.92586200 |
| C | 2.45599700  | 0.09696100  | 2.75961800  |
| H | 1.38409600  | 0.21435400  | 2.56125400  |
| H | 2.61960000  | -0.95941900 | 2.99341600  |
| H | 2.68513400  | 0.67200900  | 3.65724500  |
| C | -3.72904600 | -0.06603400 | -2.17310600 |

|    |             |             |             |
|----|-------------|-------------|-------------|
| H  | -2.68505900 | -0.28221400 | -2.41029500 |
| H  | -4.29537100 | -0.99397500 | -2.30526500 |
| H  | -4.09558700 | 0.63522800  | -2.92364700 |
| C  | -2.44016100 | 0.16992200  | 2.75315800  |
| H  | -2.62090900 | -0.88254300 | 2.99151600  |
| H  | -1.36701300 | 0.26811300  | 2.54954300  |
| H  | -2.65306500 | 0.75208100  | 3.65016900  |
| C  | 0.02969400  | 1.43233400  | -1.24924300 |
| H  | 0.90833200  | 1.43186200  | -1.90702400 |
| H  | -0.84922900 | 1.46378100  | -1.90626900 |
| C  | 0.05280700  | 2.67212200  | -0.33773400 |
| H  | 0.93465700  | 2.64416200  | 0.31601300  |
| H  | -0.82060100 | 2.66850000  | 0.32849200  |
| C  | 0.06435700  | 4.00323600  | -1.11003900 |
| H  | 0.93726200  | 4.02161900  | -1.77499300 |
| H  | -0.81519800 | 4.04247300  | -1.76531500 |
| C  | 0.08383800  | 5.23955700  | -0.20463100 |
| H  | 0.96284200  | 5.19544000  | 0.45060300  |
| H  | -0.78879700 | 5.21579500  | 0.46012500  |
| C  | 0.09492500  | 6.55720800  | -0.98328300 |
| H  | -0.79000900 | 6.65182400  | -1.62009900 |
| H  | 0.10950800  | 7.41924300  | -0.31112600 |
| H  | 0.97395300  | 6.63043600  | -1.63099000 |
| Fe | -0.01380800 | -0.28715400 | -0.18560900 |

**<sup>2</sup>Fe(+)-6**

| Atom | x           | y          | z           |
|------|-------------|------------|-------------|
| C    | 0.95661300  | 2.70370600 | 0.19935900  |
| C    | 0.91487800  | 4.09635300 | 0.33104300  |
| C    | -0.31836700 | 4.72523100 | 0.43838600  |
| C    | -1.47881900 | 3.95548100 | 0.43983400  |
| C    | -1.36814300 | 2.57152200 | 0.30631800  |
| N    | -0.17141600 | 1.97727200 | 0.16929200  |
| H    | -0.37720700 | 5.80340600 | 0.53318100  |
| H    | 1.82719900  | 4.67727600 | 0.35245700  |
| H    | -2.44621400 | 4.42845800 | 0.54469800  |
| C    | 2.22757700  | 1.92692500 | 0.14313500  |
| C    | -2.54512300 | 1.64831900 | 0.33360900  |
| N    | -2.29313700 | 0.40887700 | 0.11999400  |
| N    | 2.11184900  | 0.66479100 | -0.07276500 |
| C    | -3.90164500 | 2.22229700 | 0.63004000  |
| H    | -3.88945500 | 2.78110200 | 1.56980600  |
| H    | -4.20776000 | 2.91932100 | -0.15604000 |
| H    | -4.65349600 | 1.44009300 | 0.70299800  |

|   |             |             |             |
|---|-------------|-------------|-------------|
| C | 3.52116800  | 2.65929100  | 0.37399900  |
| H | 3.67376000  | 3.41971500  | -0.39810300 |
| H | 3.51611900  | 3.17556500  | 1.33797200  |
| H | 4.36963000  | 1.98020600  | 0.35086500  |
| C | -3.32795100 | -0.58891400 | 0.15148900  |
| C | -4.13085500 | -0.81316000 | -0.98083800 |
| C | -3.46031100 | -1.36274600 | 1.32080900  |
| C | -5.04790100 | -1.86838200 | -0.93358000 |
| C | -4.39847900 | -2.39531600 | 1.32093900  |
| C | -5.17954700 | -2.65860400 | 0.20030800  |
| H | -5.66949400 | -2.06263300 | -1.80205000 |
| H | -4.51512500 | -2.99972200 | 2.21462500  |
| H | -5.89459100 | -3.47373300 | 0.21502500  |
| C | 3.26542600  | -0.19479100 | 0.01344900  |
| C | 3.65466700  | -0.65809900 | 1.28508600  |
| C | 3.93852800  | -0.59191500 | -1.15424500 |
| C | 4.72397600  | -1.55309800 | 1.35934000  |
| C | 5.01111900  | -1.47849600 | -1.02500000 |
| C | 5.39883300  | -1.96571200 | 0.21667400  |
| H | 5.03121000  | -1.92476300 | 2.33160100  |
| H | 5.54660100  | -1.78789900 | -1.91690900 |
| H | 6.22859800  | -2.65950300 | 0.29457200  |
| C | 2.97059300  | -0.19315200 | 2.54812300  |
| H | 3.23785300  | 0.83928500  | 2.79993300  |
| H | 1.88224100  | -0.23529900 | 2.46905400  |
| H | 3.26534100  | -0.81243100 | 3.39596700  |
| C | 3.54514000  | -0.09170900 | -2.52261600 |
| H | 2.65465300  | -0.60519200 | -2.89896700 |
| H | 3.33686200  | 0.98127100  | -2.53440700 |
| H | 4.34336500  | -0.27488200 | -3.24287400 |
| C | -2.65864300 | -1.05498200 | 2.56127300  |
| H | -1.58792900 | -0.98822300 | 2.35587600  |
| H | -2.96230400 | -0.10285800 | 3.01032500  |
| H | -2.80130200 | -1.82816800 | 3.31681400  |
| C | -4.08036300 | 0.07034900  | -2.20558900 |
| H | -4.77474000 | 0.91306900  | -2.11309400 |
| H | -3.09181400 | 0.49184900  | -2.39036400 |
| H | -4.37683900 | -0.48295000 | -3.09817900 |
| C | 0.23414500  | -2.07793400 | 0.49880800  |
| H | 0.67195800  | -1.96702500 | 1.50153700  |
| H | -0.78354000 | -2.46201200 | 0.66048800  |
| C | 1.04054000  | -3.12149700 | -0.28706100 |
| H | 2.02893800  | -2.72728200 | -0.54763600 |

|    |             |             |             |
|----|-------------|-------------|-------------|
| H  | 0.53896400  | -3.33872100 | -1.23837400 |
| C  | 1.22717600  | -4.44436500 | 0.46914100  |
| H  | 1.77275900  | -4.28896000 | 1.40475900  |
| H  | 0.26269600  | -4.89563900 | 0.72110800  |
| H  | 1.78963600  | -5.17106200 | -0.12534300 |
| C  | -0.43374500 | -0.78829700 | -2.50478900 |
| H  | 0.32540900  | -1.55809900 | -2.58850600 |
| H  | -1.45591300 | -1.14204700 | -2.43585600 |
| C  | -0.12811200 | 0.51674100  | -2.65058400 |
| H  | -0.89648400 | 1.28245800  | -2.66732100 |
| H  | 0.88226100  | 0.84863900  | -2.84972500 |
| Fe | -0.05258300 | -0.18151700 | -0.22525900 |

**<sup>2</sup>Fe(+)-TS-6/7**

| Atom | x           | y           | z           |
|------|-------------|-------------|-------------|
| C    | 1.27987500  | 2.64778900  | -0.07639800 |
| C    | 1.35762500  | 4.04041700  | -0.15188500 |
| C    | 0.17793900  | 4.77671300  | -0.20719800 |
| C    | -1.04567200 | 4.11533200  | -0.14632400 |
| C    | -1.05401300 | 2.72121400  | -0.06982600 |
| N    | 0.09211500  | 2.02103200  | -0.08044700 |
| H    | 0.21152700  | 5.85794800  | -0.27331200 |
| H    | 2.31572200  | 4.54370400  | -0.16073600 |
| H    | -1.97044800 | 4.67756500  | -0.15087300 |
| C    | 2.45603600  | 1.74954200  | 0.08327300  |
| C    | -2.28327800 | 1.89791900  | 0.10288600  |
| N    | -2.09368900 | 0.62714400  | 0.19126600  |
| N    | 2.18718500  | 0.49296200  | 0.17213900  |
| C    | -3.60903500 | 2.59352900  | 0.22803200  |
| H    | -3.58641300 | 3.31871200  | 1.04638600  |
| H    | -3.84620700 | 3.14728800  | -0.68527800 |
| H    | -4.41253500 | 1.88671700  | 0.42074500  |
| C    | 3.82484000  | 2.35961700  | 0.19214500  |
| H    | 4.08739100  | 2.89377800  | -0.72591400 |
| H    | 3.85816400  | 3.08718400  | 1.00798600  |
| H    | 4.58332200  | 1.60314000  | 0.37879200  |
| C    | -3.17050100 | -0.28623600 | 0.45549400  |
| C    | -4.02419100 | -0.71440800 | -0.57718300 |
| C    | -3.28411900 | -0.78622000 | 1.76624700  |
| C    | -5.00517000 | -1.65988600 | -0.26395400 |
| C    | -4.28448200 | -1.72371200 | 2.02970900  |
| C    | -5.13905400 | -2.16250600 | 1.02484700  |
| H    | -5.67307000 | -2.00244000 | -1.04780800 |
| H    | -4.39043300 | -2.11223700 | 3.03747400  |

|    |             |             |             |
|----|-------------|-------------|-------------|
| H  | -5.90761200 | -2.89511700 | 1.24536800  |
| C  | 3.20922500  | -0.48633300 | 0.41666600  |
| C  | 3.31566200  | -0.99579200 | 1.72465900  |
| C  | 4.01560200  | -0.96433500 | -0.63185000 |
| C  | 4.25794200  | -1.99671300 | 1.96740500  |
| C  | 4.93837600  | -1.97284300 | -0.33921600 |
| C  | 5.06287600  | -2.48750100 | 0.94551100  |
| H  | 4.35775000  | -2.39398100 | 2.97240000  |
| H  | 5.56770200  | -2.35563300 | -1.13631900 |
| H  | 5.78556000  | -3.26977100 | 1.15006500  |
| C  | 2.46116200  | -0.45779300 | 2.84539600  |
| H  | 2.69842000  | 0.58608900  | 3.07559100  |
| H  | 1.39556800  | -0.49180700 | 2.59941600  |
| H  | 2.61018000  | -1.03429700 | 3.75897700  |
| C  | 3.91636700  | -0.41668400 | -2.03481800 |
| H  | 4.30828300  | 0.60325700  | -2.10852000 |
| H  | 4.49397900  | -1.02861600 | -2.72850200 |
| H  | 2.88605300  | -0.39065700 | -2.39404900 |
| C  | -2.37275900 | -0.30583000 | 2.86816100  |
| H  | -1.31716400 | -0.42153900 | 2.60408700  |
| H  | -2.52721400 | 0.75418400  | 3.09466300  |
| H  | -2.54783400 | -0.86412600 | 3.78837900  |
| C  | -3.90785400 | -0.18637500 | -1.98631600 |
| H  | -4.15345900 | 0.87825300  | -2.05367600 |
| H  | -2.89922600 | -0.30837100 | -2.38667500 |
| H  | -4.59239900 | -0.71319800 | -2.65182300 |
| C  | -0.00658300 | -2.19616300 | 0.12023600  |
| H  | 0.87627400  | -2.29311300 | 0.75573400  |
| H  | -0.92404500 | -2.30432200 | 0.70436300  |
| C  | 0.03183400  | -3.04598500 | -1.05915900 |
| H  | 0.99723100  | -3.52121000 | -1.24797000 |
| H  | 0.04575600  | -2.27413500 | -2.10888500 |
| C  | -1.15109700 | -3.94619300 | -1.36393000 |
| H  | -1.17766500 | -4.77693400 | -0.65135900 |
| H  | -2.09748100 | -3.40687700 | -1.26802300 |
| H  | -1.09653400 | -4.37512500 | -2.36785800 |
| C  | 0.02681700  | -1.35771500 | -3.11580500 |
| H  | 0.93261200  | -1.70253000 | -3.61175100 |
| H  | -0.87933300 | -1.72589000 | -3.59468100 |
| C  | 0.01530100  | -0.05342900 | -2.53954600 |
| H  | -0.89606500 | 0.52619800  | -2.67787900 |
| H  | 0.90975200  | 0.54819800  | -2.69347900 |
| Fe | 0.02371500  | -0.09364500 | -0.31305000 |

**<sup>2</sup>Fe(+)-7**

| Atom | x           | y           | z           |
|------|-------------|-------------|-------------|
| C    | -1.25857400 | 2.56805300  | -0.12196200 |
| C    | -1.31212000 | 3.95474800  | -0.25243600 |
| C    | -0.12508100 | 4.68027000  | -0.32872700 |
| C    | 1.09267200  | 4.00305100  | -0.31591800 |
| C    | 1.10155100  | 2.61564600  | -0.18289800 |
| N    | -0.06179600 | 1.93254900  | -0.02628800 |
| H    | -0.14944900 | 5.75847100  | -0.43010600 |
| H    | -2.26775800 | 4.46083000  | -0.31002500 |
| H    | 2.02289900  | 4.54706000  | -0.42179400 |
| C    | -2.38716900 | 1.64348800  | -0.16553400 |
| C    | 2.26321900  | 1.73673000  | -0.26733400 |
| N    | 1.96757300  | 0.46298900  | -0.25625300 |
| N    | -2.03918900 | 0.38420000  | -0.19064800 |
| C    | 3.64091200  | 2.31336700  | -0.41342700 |
| H    | 3.67939700  | 3.00816600  | -1.25674100 |
| H    | 3.92246200  | 2.87754400  | 0.48070500  |
| H    | 4.38589300  | 1.53890300  | -0.57915400 |
| C    | -3.79303700 | 2.16339700  | -0.23889800 |
| H    | -4.03681100 | 2.74834800  | 0.65270900  |
| H    | -3.91512000 | 2.82523200  | -1.10098600 |
| H    | -4.51572000 | 1.35597600  | -0.32907000 |
| C    | 3.00191700  | -0.52330400 | -0.42716100 |
| C    | 3.80819500  | -0.92057600 | 0.65437100  |
| C    | 3.14323400  | -1.09842400 | -1.70573200 |
| C    | 4.75148400  | -1.92932800 | 0.43270400  |
| C    | 4.10275900  | -2.09798600 | -1.87774800 |
| C    | 4.89892800  | -2.51786100 | -0.81736400 |
| H    | 5.38026600  | -2.25039600 | 1.25714400  |
| H    | 4.22732200  | -2.54712000 | -2.85785000 |
| H    | 5.63627400  | -3.29893000 | -0.96712400 |
| C    | -3.03050900 | -0.64565500 | -0.36622000 |
| C    | -3.20047800 | -1.16172700 | -1.66712500 |
| C    | -3.76208500 | -1.14586300 | 0.72641400  |
| C    | -4.10245500 | -2.21198500 | -1.84868200 |
| C    | -4.64793400 | -2.20268300 | 0.49361700  |
| C    | -4.81607600 | -2.73776600 | -0.77747200 |
| H    | -4.24589500 | -2.61793500 | -2.84488600 |
| H    | -5.21693000 | -2.60331000 | 1.32657800  |
| H    | -5.50701000 | -3.55870900 | -0.93485800 |
| C    | -2.47081300 | -0.57203500 | -2.84993100 |
| H    | -2.85280700 | 0.42274700  | -3.10274900 |

|    |             |             |             |
|----|-------------|-------------|-------------|
| H  | -1.39953000 | -0.45388900 | -2.66527400 |
| H  | -2.59278700 | -1.19926300 | -3.73368600 |
| C  | -3.65543300 | -0.54728100 | 2.10758100  |
| H  | -2.63334700 | -0.28015600 | 2.37269300  |
| H  | -4.25578300 | 0.36540400  | 2.19204700  |
| H  | -4.02996700 | -1.24136900 | 2.86141700  |
| C  | 2.31722000  | -0.62231900 | -2.87521500 |
| H  | 1.24983900  | -0.58579900 | -2.64065600 |
| H  | 2.60233800  | 0.38869800  | -3.18473900 |
| H  | 2.45096400  | -1.27548700 | -3.73829600 |
| C  | 3.70567100  | -0.27288400 | 2.01324500  |
| H  | 4.24775100  | 0.67859500  | 2.04458700  |
| H  | 2.67468400  | -0.06389600 | 2.29746800  |
| H  | 4.14510300  | -0.91120600 | 2.78107400  |
| C  | 0.01022400  | -2.13758300 | -0.27222600 |
| H  | -0.85524800 | -1.96285600 | -0.90028000 |
| H  | 0.96034000  | -2.30596400 | -0.76725600 |
| C  | -0.14252600 | -2.44882400 | 1.03294000  |
| H  | -1.13883300 | -2.39087100 | 1.46586500  |
| H  | -0.78996000 | -0.93791100 | 3.51938600  |
| C  | 0.92324900  | -3.07117900 | 1.87840800  |
| H  | 0.70895100  | -4.14444800 | 1.95349500  |
| H  | 1.91551800  | -2.96300500 | 1.43872200  |
| H  | 0.93236100  | -2.68784000 | 2.89759900  |
| Fe | -0.01469700 | 0.10755900  | 0.34164700  |
| C  | -0.00886400 | -0.17325200 | 3.54166800  |
| H  | -0.14938800 | 0.38375600  | 4.47748300  |
| H  | 0.95015800  | -0.68679900 | 3.63380800  |
| C  | -0.05356800 | 0.77482400  | 2.34882300  |
| H  | 0.77777800  | 1.48600600  | 2.41315900  |
| H  | -0.96905000 | 1.37637000  | 2.38254600  |

**<sup>2</sup>Fe(+)-8**

| Atom | x           | y          | z           |
|------|-------------|------------|-------------|
| C    | 1.18333000  | 2.52179500 | -0.01730800 |
| C    | 1.22643700  | 3.91765200 | -0.02874800 |
| C    | 0.02713900  | 4.62362000 | -0.02351500 |
| C    | -1.17859000 | 3.92858400 | -0.00100800 |
| C    | -1.14814700 | 2.53258800 | 0.00897100  |
| N    | 0.01451400  | 1.86632800 | -0.00990800 |
| H    | 0.03195800  | 5.70743200 | -0.03228500 |
| H    | 2.17097300  | 4.44575800 | -0.03987700 |
| H    | -2.11812600 | 4.46550700 | 0.00969200  |
| C    | 2.39391100  | 1.64566900 | 0.00277200  |

|   |             |             |             |
|---|-------------|-------------|-------------|
| C | -2.36645600 | 1.66744000  | 0.05296800  |
| N | -2.14589700 | 0.40268100  | 0.10810500  |
| N | 2.16327700  | 0.38356200  | 0.07303500  |
| C | -3.71787700 | 2.31922400  | 0.05630100  |
| H | -3.80986200 | 3.00036900  | 0.90748800  |
| H | -3.86647000 | 2.91445100  | -0.84944900 |
| H | -4.51396800 | 1.58154500  | 0.12028400  |
| C | 3.75186000  | 2.28275700  | -0.03840600 |
| H | 3.87304100  | 2.88212900  | -0.94549000 |
| H | 3.88443100  | 2.95697300  | 0.81299800  |
| H | 4.54086900  | 1.53524900  | -0.00932700 |
| C | -3.21039200 | -0.56174900 | 0.14083100  |
| C | -3.85764800 | -0.92600200 | -1.05239600 |
| C | -3.50451400 | -1.17594600 | 1.37020000  |
| C | -4.83985900 | -1.91716100 | -0.98160300 |
| C | -4.50065000 | -2.15320700 | 1.39010700  |
| C | -5.16559400 | -2.52307000 | 0.22605000  |
| H | -5.34955500 | -2.21816500 | -1.89113200 |
| H | -4.75045900 | -2.63261300 | 2.33101700  |
| H | -5.93119700 | -3.29032400 | 0.25872700  |
| C | 3.22522100  | -0.58518500 | 0.10220300  |
| C | 3.59234700  | -1.12771000 | 1.34483000  |
| C | 3.79479600  | -1.02301500 | -1.10507100 |
| C | 4.58414800  | -2.11012200 | 1.36001500  |
| C | 4.77746600  | -2.01354800 | -1.03790100 |
| C | 5.17521800  | -2.55072800 | 0.18101000  |
| H | 4.88876200  | -2.53716700 | 2.30998400  |
| H | 5.22992300  | -2.36912800 | -1.95793100 |
| H | 5.93928100  | -3.31961000 | 0.21136100  |
| C | 2.93950000  | -0.66593300 | 2.62387400  |
| H | 3.12160900  | 0.39454800  | 2.82559500  |
| H | 1.85294900  | -0.80442300 | 2.59542100  |
| H | 3.31644500  | -1.22868100 | 3.47824800  |
| C | 3.35911200  | -0.46192500 | -2.43677400 |
| H | 2.27314300  | -0.51043200 | -2.56385900 |
| H | 3.65318900  | 0.58521400  | -2.56570500 |
| H | 3.80790800  | -1.02260900 | -3.25705200 |
| C | -2.77479500 | -0.78863600 | 2.63202800  |
| H | -1.69411200 | -0.94456100 | 2.53718800  |
| H | -2.92528000 | 0.26335500  | 2.89416300  |
| H | -3.11483700 | -1.38721600 | 3.47753100  |
| C | -3.50872600 | -0.28954100 | -2.37614600 |
| H | -3.87535800 | 0.73980200  | -2.45252000 |



|    |             |             |             |
|----|-------------|-------------|-------------|
| H  | -2.42876700 | -0.26176700 | -2.54726500 |
| H  | -3.95471200 | -0.84678200 | -3.20034900 |
| C  | -0.00128200 | -2.33563600 | -0.23390500 |
| H  | 0.95919100  | -2.70111400 | 0.15454600  |
| H  | -0.75845300 | -2.73501200 | 0.45509100  |
| C  | -0.23818900 | -2.92110300 | -1.63761600 |
| H  | 0.52278500  | -2.59680700 | -2.35584100 |
| H  | -1.21128400 | -2.62830400 | -2.04542000 |
| H  | -0.21839800 | -4.01753100 | -1.63659200 |
| Fe | 0.00478900  | -0.30164500 | -0.05224800 |

**<sup>2</sup>Fe(+)-3/9**

| Atom | x           | y           | z           |
|------|-------------|-------------|-------------|
| C    | -1.10261900 | 2.60071700  | 0.05342700  |
| C    | -1.11721300 | 3.99489400  | 0.12477500  |
| C    | 0.09407300  | 4.67871200  | 0.17395600  |
| C    | 1.28895400  | 3.96287900  | 0.14809200  |
| C    | 1.23719000  | 2.57140000  | 0.07592000  |
| N    | 0.05921300  | 1.92473100  | 0.03145400  |
| H    | 0.10770300  | 5.76083100  | 0.23191000  |
| H    | -2.05218600 | 4.53959700  | 0.14272100  |
| H    | 2.23764300  | 4.48256300  | 0.18476800  |
| C    | -2.32068000 | 1.75166900  | -0.00490500 |
| C    | 2.43042600  | 1.68415400  | 0.04209400  |
| N    | 2.17836600  | 0.42127100  | 0.00301700  |
| N    | -2.11474700 | 0.47883100  | -0.02236600 |
| C    | 3.79993100  | 2.29771500  | 0.05840700  |
| H    | 3.93492400  | 2.96899700  | -0.79457700 |
| H    | 3.94377900  | 2.89464200  | 0.96388100  |
| H    | 4.57590100  | 1.53664100  | 0.02376500  |
| C    | -3.66825000 | 2.41329500  | -0.03944600 |
| H    | -3.82538400 | 3.01623600  | 0.85985500  |
| H    | -3.74774100 | 3.08727400  | -0.89719400 |
| H    | -4.46921500 | 1.68064500  | -0.10236700 |
| C    | 3.23236700  | -0.55519200 | -0.04390000 |
| C    | 3.71168300  | -1.09732200 | 1.16224800  |
| C    | 3.70287600  | -0.98620100 | -1.29698500 |
| C    | 4.68071300  | -2.10094200 | 1.08530200  |
| C    | 4.67028900  | -1.99413100 | -1.31945600 |
| C    | 5.15500300  | -2.55138900 | -0.14182300 |
| H    | 5.06622700  | -2.53134600 | 2.00398900  |
| H    | 5.04653000  | -2.34153100 | -2.27634100 |
| H    | 5.90362500  | -3.33508200 | -0.17999500 |
| C    | -3.20897400 | -0.45236700 | -0.08564500 |

|    |             |             |             |
|----|-------------|-------------|-------------|
| C  | -3.63362300 | -0.91257400 | -1.34471600 |
| C  | -3.77540000 | -0.92119700 | 1.11287400  |
| C  | -4.64670400 | -1.87400000 | -1.38044100 |
| C  | -4.78811600 | -1.87972800 | 1.02272500  |
| C  | -5.21977100 | -2.35767800 | -0.20962400 |
| H  | -4.98958400 | -2.24229500 | -2.34203500 |
| H  | -5.23977100 | -2.25478800 | 1.93552300  |
| H  | -6.00412300 | -3.10508500 | -0.25760200 |
| C  | -3.04655700 | -0.36651400 | -2.62331600 |
| H  | -3.36212300 | 0.66669800  | -2.80532500 |
| H  | -1.95331400 | -0.36731600 | -2.60856200 |
| H  | -3.36974900 | -0.95607600 | -3.48198500 |
| C  | -3.32242400 | -0.40420200 | 2.45613000  |
| H  | -2.23425900 | -0.42777700 | 2.55593700  |
| H  | -3.63817900 | 0.63181500  | 2.62113600  |
| H  | -3.74840200 | -1.00034300 | 3.26389300  |
| C  | 3.21629000  | -0.36332800 | -2.58336200 |
| H  | 2.12925800  | -0.25188600 | -2.60741600 |
| H  | 3.64186300  | 0.63488300  | -2.73540100 |
| H  | 3.50877400  | -0.96842400 | -3.44228500 |
| C  | 3.22513400  | -0.59905100 | 2.50144800  |
| H  | 3.59701400  | 0.40867700  | 2.71728800  |
| H  | 2.13425000  | -0.55468600 | 2.55293900  |
| H  | 3.57405100  | -1.24749400 | 3.30593600  |
| C  | 0.04860500  | -2.08288400 | -0.94981500 |
| H  | -0.88933900 | -2.30515100 | -1.44927200 |
| H  | 0.92845600  | -2.06076900 | -1.58417000 |
| C  | 0.19654500  | -2.43076800 | 0.41140900  |
| H  | -0.01591400 | -1.08321700 | 1.41901000  |
| H  | 1.21524800  | -2.57540000 | 0.76110000  |
| C  | -0.83756200 | -3.26427200 | 1.13464500  |
| H  | -1.85409900 | -2.99152500 | 0.84944600  |
| H  | -0.68423700 | -4.31130800 | 0.85168700  |
| H  | -0.74587400 | -3.19136300 | 2.21926100  |
| Fe | 0.01558900  | -0.17502500 | 0.02983300  |

**<sup>2</sup>Fe(+)-9**

| Atom | x           | y          | z           |
|------|-------------|------------|-------------|
| C    | 1.18824300  | 2.58062200 | -0.03904100 |
| C    | 1.23391600  | 3.97648400 | -0.02958200 |
| C    | 0.03602900  | 4.68491000 | -0.01821900 |
| C    | -1.17280000 | 3.99536600 | -0.01090700 |
| C    | -1.14649600 | 2.59934300 | -0.02433800 |
| N    | 0.01525600  | 1.93394700 | -0.04451800 |

|   |             |             |             |
|---|-------------|-------------|-------------|
| H | 0.04471400  | 5.76884800  | -0.01096100 |
| H | 2.17890700  | 4.50347800  | -0.02962800 |
| H | -2.10989300 | 4.53613400  | 0.00563200  |
| C | 2.40264400  | 1.70531200  | -0.02766500 |
| C | -2.36885600 | 1.73809800  | -0.00484800 |
| N | -2.16103700 | 0.47081400  | 0.00570000  |
| N | 2.18378600  | 0.44081600  | -0.00884100 |
| C | -3.71512500 | 2.40332400  | 0.00456700  |
| H | -3.82309800 | 3.05023800  | 0.88008600  |
| H | -3.83769100 | 3.03534500  | -0.87995800 |
| H | -4.51934000 | 1.67157700  | 0.01703700  |
| C | 3.75541400  | 2.35804400  | -0.02960900 |
| H | 3.87592200  | 3.00801900  | 0.84197500  |
| H | 4.55162100  | 1.61754900  | -0.01804400 |
| H | 3.87958900  | 2.98372900  | -0.91844400 |
| C | -3.25612500 | -0.46063200 | 0.05251000  |
| C | -3.77790500 | -0.96937600 | -1.15053900 |
| C | -3.71715900 | -0.89329700 | 1.30882100  |
| C | -4.77608900 | -1.94374300 | -1.06491700 |
| C | -4.71540100 | -1.87049400 | 1.33967100  |
| C | -5.24004900 | -2.39723400 | 0.16498500  |
| H | -5.19333500 | -2.34866100 | -1.98127800 |
| H | -5.08386400 | -2.21726500 | 2.29986300  |
| H | -6.01231300 | -3.15741500 | 0.20775700  |
| C | 3.26720500  | -0.50348000 | 0.04766200  |
| C | 3.71627000  | -0.92940200 | 1.31133300  |
| C | 3.79774700  | -1.02314400 | -1.14693500 |
| C | 4.70534500  | -1.91517000 | 1.35822900  |
| C | 4.78635400  | -2.00601100 | -1.04439000 |
| C | 5.23461900  | -2.45597300 | 0.19227500  |
| H | 5.06372700  | -2.25625500 | 2.32428800  |
| H | 5.20972900  | -2.41933500 | -1.95417000 |
| H | 5.99946400  | -3.22287100 | 0.24713000  |
| C | 3.18334800  | -0.32158500 | 2.58669600  |
| H | 3.56605800  | 0.69317300  | 2.74251600  |
| H | 2.09255400  | -0.25181800 | 2.59176500  |
| H | 3.48403800  | -0.91172700 | 3.45320800  |
| C | 3.35279300  | -0.52343900 | -2.49955800 |
| H | 2.26621700  | -0.54140500 | -2.60741300 |
| H | 3.67882500  | 0.50801700  | -2.67541200 |
| H | 3.78182600  | -1.13354700 | -3.29531400 |
| C | -3.18239800 | -0.30694400 | 2.59327000  |
| H | -2.09156200 | -0.23633900 | 2.59719400  |

|    |             |             |             |
|----|-------------|-------------|-------------|
| H  | -3.56409800 | 0.70531800  | 2.76668000  |
| H  | -3.48050300 | -0.91138100 | 3.45064500  |
| C  | -3.30244100 | -0.47199400 | -2.49366800 |
| H  | -3.60637100 | 0.56581200  | -2.67068600 |
| H  | -2.21403200 | -0.50762000 | -2.58401600 |
| H  | -3.72806900 | -1.07112600 | -3.29949700 |
| C  | 0.22607600  | -2.08276100 | 1.13832200  |
| H  | 1.30007200  | -2.23408000 | 1.15886500  |
| H  | -0.21337700 | -1.56294500 | 1.98562100  |
| C  | -0.55192300 | -2.70062100 | 0.22693600  |
| H  | 0.07643200  | -0.62665600 | -1.98331800 |
| H  | -1.63178000 | -2.60520300 | 0.31230000  |
| C  | -0.05388100 | -3.60385900 | -0.85630200 |
| H  | 1.03571500  | -3.62622700 | -0.90837000 |
| H  | -0.41087500 | -4.62267800 | -0.66781200 |
| H  | -0.44477700 | -3.30708300 | -1.83234800 |
| Fe | 0.00605400  | -0.18341200 | -0.40541600 |

**<sup>2</sup>Fe(+)-10**

| Atom | x           | y           | z           |
|------|-------------|-------------|-------------|
| C    | -1.16931800 | 2.37214300  | -0.13257400 |
| C    | -1.20761400 | 3.75477100  | -0.32190000 |
| C    | -0.00008700 | 4.44580500  | -0.40475200 |
| C    | 1.20747200  | 3.75474300  | -0.32254400 |
| C    | 1.16921900  | 2.37213300  | -0.13312900 |
| N    | -0.00003000 | 1.73759600  | -0.01424700 |
| H    | -0.00011300 | 5.52029300  | -0.54776300 |
| H    | -2.14804000 | 4.28363800  | -0.40725100 |
| H    | 2.14786900  | 4.28357300  | -0.40844000 |
| C    | -2.36338800 | 1.46812000  | -0.08622100 |
| C    | 2.36328800  | 1.46811700  | -0.08698200 |
| N    | 2.09849700  | 0.20965300  | -0.04453500 |
| N    | -2.09856700 | 0.20965500  | -0.04444400 |
| C    | 3.73346300  | 2.07283500  | -0.13471200 |
| H    | 3.85432600  | 2.67088100  | -1.04306200 |
| H    | 3.89103000  | 2.74371100  | 0.71508200  |
| H    | 4.50597900  | 1.30785000  | -0.12276400 |
| C    | -3.73355400 | 2.07293300  | -0.13323100 |
| H    | -3.85480800 | 2.67107300  | -1.04147200 |
| H    | -4.50612100 | 1.30800800  | -0.12102400 |
| H    | -3.89067600 | 2.74373800  | 0.71670000  |
| C    | 3.12768900  | -0.79526100 | -0.00683400 |
| C    | 3.76464800  | -1.09924000 | 1.20897700  |
| C    | 3.39392700  | -1.50047700 | -1.19318500 |

|                                              |             |             |             |
|----------------------------------------------|-------------|-------------|-------------|
| C                                            | 4.71508600  | -2.12316800 | 1.20047000  |
| C                                            | 4.35806400  | -2.50866100 | -1.14970200 |
| C                                            | 5.01659800  | -2.81850000 | 0.03511200  |
| H                                            | 5.21768600  | -2.38012800 | 2.12712500  |
| H                                            | 4.58786400  | -3.05852800 | -2.05656200 |
| H                                            | 5.75793300  | -3.60973600 | 0.05254600  |
| C                                            | -3.12770000 | -0.79528600 | -0.00698000 |
| C                                            | -3.39374400 | -1.50027600 | -1.19351700 |
| C                                            | -3.76483600 | -1.09955500 | 1.20866500  |
| C                                            | -4.35786800 | -2.50848100 | -1.15039600 |
| C                                            | -4.71527200 | -2.12349000 | 1.19979500  |
| C                                            | -5.01659000 | -2.81858100 | 0.03425000  |
| H                                            | -4.58752300 | -3.05815700 | -2.05740800 |
| H                                            | -5.21800300 | -2.38065000 | 2.12632300  |
| H                                            | -5.75791800 | -3.60983100 | 0.05140100  |
| C                                            | -2.67012700 | -1.17580300 | -2.47682000 |
| H                                            | -2.86711100 | -0.15493100 | -2.81935800 |
| H                                            | -1.58405300 | -1.27001400 | -2.36462500 |
| H                                            | -2.97467300 | -1.85179500 | -3.27616600 |
| C                                            | -3.42436500 | -0.37875100 | 2.48978200  |
| H                                            | -2.35002800 | -0.40835300 | 2.69291600  |
| H                                            | -3.72791800 | 0.67336800  | 2.47184200  |
| H                                            | -3.93151700 | -0.84171900 | 3.33654700  |
| C                                            | 2.67048900  | -1.17628400 | -2.47666500 |
| H                                            | 1.58440900  | -1.27061500 | -2.36465100 |
| H                                            | 2.86741600  | -0.15544400 | -2.81932900 |
| H                                            | 2.97525200  | -1.85236100 | -3.27585600 |
| C                                            | 3.42397700  | -0.37813600 | 2.48987300  |
| H                                            | 3.72734900  | 0.67403000  | 2.47165100  |
| H                                            | 2.34963600  | -0.40784800 | 2.69299100  |
| H                                            | 3.93115900  | -0.84078100 | 3.33679600  |
| H                                            | -0.00142600 | -1.46076300 | 1.59134100  |
| Fe                                           | 0.00023000  | -0.35602800 | 0.39709100  |
| <b><math>1/2\text{Fe}(0)</math></b>          |             |             |             |
| <b><math>1/2\text{Fe}(0)\text{-1}</math></b> |             |             |             |
| C                                            | -1.20038500 | 2.47476700  | -0.00726300 |
| C                                            | -1.21535600 | 3.86892200  | -0.00597700 |
| C                                            | 0.00013900  | 4.56144000  | -0.00496600 |
| C                                            | 1.21556600  | 3.86887800  | -0.00594700 |
| C                                            | 1.20056100  | 2.47469800  | -0.00722700 |
| N                                            | 0.00011100  | 1.81608700  | -0.00722000 |
| H                                            | 0.00016500  | 5.64582600  | -0.00391400 |
| H                                            | -2.14917800 | 4.41790500  | -0.00557200 |

|   |             |             |             |
|---|-------------|-------------|-------------|
| H | 2.14942400  | 4.41780000  | -0.00554500 |
| C | -2.31147000 | 1.54773600  | -0.00674900 |
| C | 2.31136200  | 1.54751500  | -0.00663500 |
| N | 1.95920200  | 0.26336800  | -0.01140200 |
| N | -1.95974600 | 0.26345800  | -0.01145200 |
| C | 3.74336900  | 2.00434800  | 0.00236100  |
| H | 4.29334700  | 1.60528300  | -0.85445300 |
| H | 3.82027200  | 3.09044200  | -0.02576600 |
| H | 4.26817900  | 1.65344900  | 0.89573200  |
| C | -3.74338200 | 2.00485600  | 0.00212600  |
| H | -3.82012400 | 3.09092400  | -0.02731000 |
| H | -4.29366700 | 1.60481100  | -0.85402600 |
| H | -4.26797800 | 1.65515000  | 0.89610400  |
| C | 2.98691900  | -0.73317400 | 0.00314500  |
| C | 3.45431200  | -1.22393800 | 1.23488100  |
| C | 3.46692900  | -1.24581100 | -1.21477100 |
| C | 4.43945500  | -2.21407600 | 1.22605900  |
| C | 4.45234400  | -2.23521900 | -1.17831300 |
| C | 4.94328000  | -2.71499200 | 0.03083000  |
| H | 4.80794300  | -2.60045700 | 2.17200000  |
| H | 4.83077500  | -2.63797700 | -2.11342100 |
| H | 5.70718200  | -3.48592700 | 0.04171300  |
| C | -2.98737500 | -0.73315300 | 0.00301000  |
| C | -3.46677000 | -1.24624800 | -1.21495100 |
| C | -3.45501600 | -1.22377800 | 1.23470800  |
| C | -4.45209900 | -2.23574100 | -1.17860000 |
| C | -4.44006100 | -2.21401000 | 1.22578000  |
| C | -4.94346200 | -2.71521800 | 0.03049000  |
| H | -4.83010500 | -2.63881800 | -2.11374200 |
| H | -4.80877500 | -2.60026400 | 2.17168400  |
| H | -5.70731200 | -3.48620600 | 0.04129300  |
| C | -2.90790500 | -0.76400300 | -2.52999400 |
| H | -3.04174600 | 0.31261500  | -2.67291000 |
| H | -1.83229200 | -0.95712200 | -2.59004700 |
| H | -3.38865200 | -1.27255400 | -3.36792800 |
| C | -2.88742700 | -0.71622000 | 2.53688400  |
| H | -1.80823600 | -0.88897100 | 2.58777200  |
| H | -3.03868600 | 0.35945700  | 2.66962900  |
| H | -3.34912000 | -1.22279600 | 3.38660000  |
| C | 2.90875200  | -0.76311200 | -2.52994500 |
| H | 1.83316500  | -0.95610200 | -2.59066300 |
| H | 3.04274600  | 0.31354100  | -2.67244700 |
| H | 3.38991900  | -1.27141500 | -3.36779000 |

|    |             |             |             |
|----|-------------|-------------|-------------|
| C  | 2.88666800  | -0.71635600 | 2.53702700  |
| H  | 3.03864300  | 0.35919300  | 2.67005000  |
| H  | 1.80736000  | -0.88834000 | 2.58764200  |
| H  | 3.34782800  | -1.22342300 | 3.38674000  |
| Fe | -0.00065000 | -0.09731900 | -0.02753600 |
| C  | 0.00247800  | -2.10815200 | -0.05484700 |
| H  | 0.00582300  | -2.45461000 | 0.99214600  |
| H  | -0.88562300 | -2.55749500 | -0.51469900 |
| H  | 0.89011100  | -2.55377000 | -0.51910600 |

 **$1/2\text{Fe(0)}-2$** 

|   |             |             |             |
|---|-------------|-------------|-------------|
| C | -1.19110600 | 2.46133800  | -0.18117800 |
| C | -1.21238600 | 3.83412000  | -0.38899200 |
| C | -0.00277700 | 4.53595500  | -0.47481600 |
| C | 1.20384700  | 3.84431100  | -0.37969000 |
| C | 1.19986100  | 2.46344300  | -0.17331900 |
| N | 0.00197100  | 1.80316600  | -0.02909800 |
| H | -0.00479000 | 5.60704500  | -0.64077400 |
| H | -2.15576700 | 4.35671600  | -0.49896500 |
| H | 2.13994100  | 4.38011300  | -0.48312400 |
| C | -2.31899900 | 1.56485900  | -0.16227700 |
| C | 2.31371500  | 1.56375600  | -0.14406200 |
| N | 1.96941500  | 0.28128500  | -0.01914200 |
| N | -1.99271900 | 0.28785800  | -0.04411000 |
| C | 3.73811000  | 2.02160700  | -0.29714500 |
| H | 3.81615300  | 3.10811900  | -0.29200300 |
| H | 4.37024400  | 1.63824800  | 0.50727900  |
| H | 4.17420600  | 1.66002900  | -1.23396400 |
| C | -3.72616800 | 2.08275600  | -0.30291800 |
| H | -3.98132800 | 2.75487500  | 0.52210400  |
| H | -3.84519600 | 2.65196200  | -1.22956500 |
| H | -4.45187900 | 1.27189000  | -0.31396300 |
| C | 2.99548500  | -0.71251900 | -0.12118800 |
| C | 3.68797300  | -1.16657300 | 1.01788200  |
| C | 3.27046100  | -1.24959400 | -1.39590100 |
| C | 4.64657400  | -2.17150100 | 0.85675000  |
| C | 4.23809900  | -2.25033700 | -1.50923700 |
| C | 4.92295900  | -2.71457200 | -0.39224100 |
| H | 5.18330300  | -2.52930500 | 1.73062700  |
| H | 4.45094900  | -2.67040100 | -2.48804500 |
| H | 5.66808000  | -3.49715200 | -0.49443700 |
| C | -3.00443300 | -0.72032700 | -0.14412400 |
| C | -3.23867100 | -1.29628800 | -1.40948300 |
| C | -3.71422100 | -1.15403000 | 0.99127200  |

|    |             |             |             |
|----|-------------|-------------|-------------|
| C  | -4.17542300 | -2.32680800 | -1.51333800 |
| C  | -4.64008100 | -2.19069600 | 0.84013800  |
| C  | -4.86967100 | -2.78001900 | -0.39726100 |
| H  | -4.35760400 | -2.77814900 | -2.48429300 |
| H  | -5.18832800 | -2.53539600 | 1.71209900  |
| H  | -5.58846200 | -3.58767300 | -0.49213000 |
| C  | -2.51039700 | -0.79834700 | -2.63314000 |
| H  | -2.82458700 | 0.21505000  | -2.90498200 |
| H  | -1.43119600 | -0.75312400 | -2.46911900 |
| H  | -2.70401100 | -1.44415400 | -3.49178400 |
| C  | -3.52692500 | -0.49922600 | 2.33724100  |
| H  | -2.47537600 | -0.37050600 | 2.58971700  |
| H  | -3.98004100 | 0.49845600  | 2.36206600  |
| H  | -4.00146000 | -1.08892400 | 3.12413100  |
| C  | 2.53858400  | -0.75395000 | -2.61864800 |
| H  | 1.45543100  | -0.78846300 | -2.47782800 |
| H  | 2.78468700  | 0.28791300  | -2.84861100 |
| H  | 2.79318900  | -1.35386400 | -3.49458200 |
| C  | 3.43920600  | -0.57800100 | 2.38495600  |
| H  | 3.77521900  | 0.46267500  | 2.44791000  |
| H  | 2.38121500  | -0.57379000 | 2.64474400  |
| H  | 3.97876100  | -1.13975700 | 3.15007100  |
| C  | -0.02057800 | -1.95603900 | 1.31348400  |
| H  | -0.94790000 | -2.07650300 | 1.86051600  |
| H  | 0.87985400  | -2.08694900 | 1.90075800  |
| C  | 0.00986200  | -2.05660400 | -0.06253000 |
| H  | 0.93765900  | -2.27267000 | -0.57829700 |
| H  | -0.89714700 | -2.26366800 | -0.61782700 |
| Fe | 0.00371600  | 0.01097300  | 0.46912600  |
| C  | -0.02438300 | 0.61570000  | 2.46040700  |
| H  | -0.05978400 | -0.15327900 | 3.23615400  |
| H  | 0.87347500  | 1.22424800  | 2.60872600  |
| H  | -0.88591100 | 1.28044300  | 2.58271400  |

 **$1/2\text{Fe(0)}\text{-TS2/3}$** 

|   |             |            |             |
|---|-------------|------------|-------------|
| C | 1.18235100  | 2.49005100 | 0.13091500  |
| C | 1.21889200  | 3.85642400 | 0.36010700  |
| C | 0.00546400  | 4.56417700 | 0.44513800  |
| C | -1.19924300 | 3.87926600 | 0.35654900  |
| C | -1.20657000 | 2.49382000 | 0.13872100  |
| N | -0.00474400 | 1.83988900 | -0.04868500 |
| H | 0.01148500  | 5.63459300 | 0.61663600  |
| H | 2.16277800  | 4.37250300 | 0.48861900  |
| H | -2.13159000 | 4.41906100 | 0.47317900  |



|   |             |             |             |
|---|-------------|-------------|-------------|
| C | 2.32767700  | 1.58736700  | 0.15254200  |
| C | -2.32190200 | 1.59757300  | 0.15942900  |
| N | -1.99984800 | 0.30194400  | 0.03618100  |
| N | 2.04002800  | 0.31463700  | 0.03100300  |
| C | -3.73281000 | 2.06666100  | 0.39124200  |
| H | -3.80459000 | 3.15372000  | 0.38773600  |
| H | -4.41780500 | 1.68665300  | -0.37051800 |
| H | -4.11444800 | 1.71082400  | 1.35436000  |
| C | 3.71276900  | 2.13524700  | 0.38144400  |
| H | 3.97450100  | 2.86721600  | -0.38773000 |
| H | 3.76994600  | 2.64913200  | 1.34549400  |
| H | 4.46340700  | 1.34802000  | 0.37493600  |
| C | -3.03576900 | -0.67637600 | 0.14910800  |
| C | -3.80626000 | -1.04612900 | -0.97090100 |
| C | -3.24418400 | -1.29424100 | 1.39855100  |
| C | -4.78355900 | -2.03341000 | -0.81490000 |
| C | -4.22835900 | -2.27880000 | 1.50879100  |
| C | -4.99781400 | -2.65011400 | 0.41201500  |
| H | -5.38314700 | -2.32008300 | -1.67434900 |
| H | -4.39004300 | -2.75810900 | 2.47015900  |
| H | -5.76015700 | -3.41622800 | 0.51265300  |
| C | 3.05412600  | -0.68438500 | 0.17941600  |
| C | 3.15740800  | -1.32980900 | 1.42838500  |
| C | 3.88544000  | -1.05232700 | -0.89593400 |
| C | 4.09913400  | -2.34916300 | 1.58030800  |
| C | 4.81499500  | -2.07742000 | -0.69582100 |
| C | 4.92429800  | -2.72713800 | 0.52743400  |
| H | 4.18247900  | -2.85016100 | 2.54027600  |
| H | 5.46244100  | -2.36552500 | -1.51893700 |
| H | 5.65054300  | -3.52259000 | 0.66019900  |
| C | 2.27703100  | -0.92273400 | 2.58243300  |
| H | 2.47853500  | 0.10291800  | 2.90828400  |
| H | 1.21993400  | -0.96082500 | 2.30637400  |
| H | 2.43207000  | -1.57903200 | 3.44088400  |
| C | 3.79626000  | -0.38213400 | -2.24563600 |
| H | 2.90745000  | -0.70221200 | -2.79470200 |
| H | 3.74360100  | 0.70635500  | -2.17134800 |
| H | 4.66731400  | -0.63026300 | -2.85530700 |
| C | -2.41044200 | -0.90850500 | 2.59368800  |
| H | -1.34740900 | -1.07078900 | 2.39513700  |
| H | -2.52014600 | 0.15026200  | 2.84785500  |
| H | -2.69111800 | -1.49416800 | 3.47158500  |
| C | -3.59034100 | -0.41737000 | -2.32666600 |

|                                       |             |             |             |
|---------------------------------------|-------------|-------------|-------------|
| H                                     | -3.49705100 | 0.66952700  | -2.27543700 |
| H                                     | -2.67430600 | -0.78471800 | -2.79666200 |
| H                                     | -4.42052600 | -0.65102800 | -2.99665900 |
| C                                     | 0.06338800  | -1.85285900 | -1.71534300 |
| H                                     | 1.00096400  | -2.13195100 | -2.18673800 |
| H                                     | -0.79224300 | -2.12306300 | -2.32573000 |
| C                                     | -0.05898300 | -2.05521700 | -0.30050300 |
| H                                     | -0.99849400 | -2.45889900 | 0.06542900  |
| H                                     | 0.81935700  | -2.43458300 | 0.21820200  |
| Fe                                    | -0.03870000 | -0.02821400 | -0.37412200 |
| C                                     | 0.14749300  | 0.00248900  | -2.60749700 |
| H                                     | 0.13130500  | -0.55588100 | -3.54238800 |
| H                                     | -0.72973300 | 0.65431600  | -2.60581100 |
| H                                     | 1.04990900  | 0.61360300  | -2.59608200 |
| <b><math>1/2\text{Fe(0)}-3</math></b> |             |             |             |
| C                                     | -1.24781500 | 2.69031100  | 0.09812500  |
| C                                     | -1.25820100 | 4.09303000  | 0.18150700  |
| C                                     | -0.05869700 | 4.79132500  | 0.21575300  |
| C                                     | 1.17014700  | 4.10373900  | 0.16531200  |
| C                                     | 1.14155100  | 2.71899400  | 0.08490900  |
| N                                     | -0.03456800 | 2.04565600  | 0.05676500  |
| H                                     | -0.06765400 | 5.87375100  | 0.28089400  |
| H                                     | -2.19578400 | 4.63501300  | 0.22043100  |
| H                                     | 2.10718800  | 4.64666200  | 0.18952300  |
| C                                     | -2.34337100 | 1.77021200  | 0.04386600  |
| C                                     | 2.28420400  | 1.81004800  | 0.02068800  |
| N                                     | 1.97622600  | 0.53532400  | -0.04805100 |
| N                                     | -1.98621100 | 0.47537900  | -0.04283800 |
| C                                     | 3.68437200  | 2.35691400  | 0.03300500  |
| H                                     | 3.82452300  | 3.06900800  | -0.78545300 |
| H                                     | 3.87809300  | 2.89994300  | 0.96321900  |
| H                                     | 4.42918900  | 1.57022500  | -0.06505600 |
| C                                     | -3.77900500 | 2.21416900  | 0.06685200  |
| H                                     | -3.86362300 | 3.29858300  | 0.13278000  |
| H                                     | -4.31132100 | 1.89223500  | -0.83357400 |
| H                                     | -4.32187800 | 1.78568300  | 0.91452700  |
| C                                     | 3.01512900  | -0.45192500 | -0.10166600 |
| C                                     | 3.55418200  | -0.94934000 | 1.09721800  |
| C                                     | 3.43312800  | -0.93720800 | -1.35284000 |
| C                                     | 4.52889800  | -1.94723100 | 1.02007900  |
| C                                     | 4.41198400  | -1.93293600 | -1.38228200 |
| C                                     | 4.95811500  | -2.43848900 | -0.20755900 |
| H                                     | 4.95010200  | -2.34454300 | 1.93884100  |

|                                       |             |             |             |
|---------------------------------------|-------------|-------------|-------------|
| H                                     | 4.74337800  | -2.31786300 | -2.34213900 |
| H                                     | 5.71263800  | -3.21739300 | -0.24879100 |
| C                                     | -3.01219300 | -0.51829300 | -0.07937200 |
| C                                     | -3.48278800 | -0.98254600 | -1.32147400 |
| C                                     | -3.50291100 | -1.05312800 | 1.12644300  |
| C                                     | -4.46519500 | -1.97551300 | -1.33600500 |
| C                                     | -4.48369100 | -2.04617200 | 1.06723900  |
| C                                     | -4.96806600 | -2.50517000 | -0.15272900 |
| H                                     | -4.83374700 | -2.33996300 | -2.29072300 |
| H                                     | -4.86654900 | -2.46632400 | 1.99302200  |
| H                                     | -5.72861100 | -3.27913500 | -0.18125300 |
| C                                     | -2.92524200 | -0.43370100 | -2.61038700 |
| H                                     | -3.08823100 | 0.64411800  | -2.70710600 |
| H                                     | -1.84415200 | -0.59165400 | -2.66766900 |
| H                                     | -3.38626400 | -0.91907800 | -3.47305000 |
| C                                     | -2.97722200 | -0.57389100 | 2.45678800  |
| H                                     | -1.88731500 | -0.64653800 | 2.50249900  |
| H                                     | -3.22661500 | 0.47484300  | 2.64805300  |
| H                                     | -3.39166700 | -1.16589600 | 3.27529000  |
| C                                     | 2.84931100  | -0.39113800 | -2.63161400 |
| H                                     | 1.75975400  | -0.48141700 | -2.64393000 |
| H                                     | 3.08037000  | 0.67053400  | -2.76719500 |
| H                                     | 3.24118500  | -0.92709200 | -3.49791400 |
| C                                     | 3.10412200  | -0.41675000 | 2.43540500  |
| H                                     | 3.45996100  | 0.60465400  | 2.60930400  |
| H                                     | 2.01471400  | -0.38919000 | 2.51449600  |
| H                                     | 3.48586200  | -1.03722100 | 3.24811800  |
| C                                     | -0.01810400 | -1.88433200 | -0.35623300 |
| H                                     | -0.95145900 | -2.21021000 | -0.83384600 |
| H                                     | 0.78749400  | -2.12037200 | -1.07114700 |
| C                                     | 0.19513500  | -2.73081700 | 0.90940700  |
| H                                     | -0.61428200 | -2.53854000 | 1.62560100  |
| H                                     | 1.12240100  | -2.43696500 | 1.41695800  |
| C                                     | 0.25412700  | -4.24293700 | 0.64307600  |
| H                                     | -0.67067300 | -4.59229700 | 0.17282300  |
| H                                     | 1.07944400  | -4.48881200 | -0.03298800 |
| H                                     | 0.39697500  | -4.81743600 | 1.56612400  |
| Fe                                    | -0.03396100 | 0.11710900  | -0.08972600 |
| <b><math>1/2\text{Fe(0)}-4</math></b> |             |             |             |
| C                                     | 1.19748800  | 2.61239300  | -0.30122500 |
| C                                     | 1.20174000  | 3.97721900  | -0.62829000 |
| C                                     | 0.00302100  | 4.64857000  | -0.81648100 |
| C                                     | -1.21153800 | 3.94800100  | -0.69387700 |

|   |             |             |             |
|---|-------------|-------------|-------------|
| C | -1.17905000 | 2.60367400  | -0.35751000 |
| N | -0.00132000 | 1.95721800  | -0.13598200 |
| H | 0.00037700  | 5.70153800  | -1.07431200 |
| H | 2.14197700  | 4.50327100  | -0.74816800 |
| H | -2.15335400 | 4.45232700  | -0.87302100 |
| C | 2.32504200  | 1.73992300  | -0.17921800 |
| C | -2.33513300 | 1.71399500  | -0.26698800 |
| N | -2.06802800 | 0.47511500  | 0.04929200  |
| N | 2.02248200  | 0.46735200  | 0.09944000  |
| C | -3.70966800 | 2.24275900  | -0.58458200 |
| H | -3.93504000 | 3.11848300  | 0.02996500  |
| H | -3.77264800 | 2.56091200  | -1.62954200 |
| H | -4.47964900 | 1.49394300  | -0.41159400 |
| C | 3.72260200  | 2.24105100  | -0.43652800 |
| H | 3.93304500  | 2.32266200  | -1.50932200 |
| H | 3.87090500  | 3.23344800  | -0.00430400 |
| H | 4.47170000  | 1.57566800  | -0.01015800 |
| C | -3.10569000 | -0.51278200 | -0.01938300 |
| C | -3.36430800 | -1.12611200 | -1.26040600 |
| C | -3.82755200 | -0.87614600 | 1.13229200  |
| C | -4.31414400 | -2.14905500 | -1.31387500 |
| C | -4.77430200 | -1.89816500 | 1.02938300  |
| C | -5.01065600 | -2.54409800 | -0.17858100 |
| H | -4.50787800 | -2.63705600 | -2.26459800 |
| H | -5.33432200 | -2.18618000 | 1.91423200  |
| H | -5.74129700 | -3.34442100 | -0.23612600 |
| C | 3.05970300  | -0.51466200 | -0.01916700 |
| C | 3.81203700  | -0.93053900 | 1.09366900  |
| C | 3.31159800  | -1.06553500 | -1.29606900 |
| C | 4.76229800  | -1.94390500 | 0.92373700  |
| C | 4.26450300  | -2.07644700 | -1.41887200 |
| C | 4.98211300  | -2.52739200 | -0.31538400 |
| H | 5.34157100  | -2.26847500 | 1.78428500  |
| H | 4.44755300  | -2.51222400 | -2.39696800 |
| H | 5.71692600  | -3.31852500 | -0.42637300 |
| C | 3.68176400  | -0.28570700 | 2.45421700  |
| H | 4.65669100  | 0.06791500  | 2.80443200  |
| H | 3.00550300  | 0.56679500  | 2.44498100  |
| H | 3.31945600  | -0.99659200 | 3.20325000  |
| C | 2.60206500  | -0.55186800 | -2.52615100 |
| H | 1.54029100  | -0.37941100 | -2.34606300 |
| H | 3.02598400  | 0.40089300  | -2.86315200 |
| H | 2.69798400  | -1.25828900 | -3.35321300 |

|    |             |             |             |
|----|-------------|-------------|-------------|
| C  | -3.63733200 | -0.15587900 | 2.44382500  |
| H  | -2.62903100 | -0.27979900 | 2.84036900  |
| H  | -3.80812600 | 0.92081400  | 2.34511500  |
| H  | -4.33577500 | -0.53047600 | 3.19434200  |
| C  | -2.67901600 | -0.66706500 | -2.52496200 |
| H  | -3.14191100 | 0.24513400  | -2.91942300 |
| H  | -1.62299200 | -0.44542600 | -2.36701500 |
| H  | -2.75208000 | -1.42754400 | -3.30456100 |
| C  | 0.03133200  | -1.92601400 | 0.49410800  |
| H  | 0.88666700  | -2.30105000 | 1.07331800  |
| H  | -0.86584100 | -2.27265400 | 1.02979500  |
| C  | 0.05196900  | -2.64023000 | -0.86656600 |
| H  | 0.95700700  | -2.37673900 | -1.42199100 |
| H  | -0.79174500 | -2.31947000 | -1.48719800 |
| C  | -0.00355000 | -4.17221600 | -0.74826500 |
| H  | 0.84728300  | -4.55021600 | -0.17215800 |
| H  | -0.91603300 | -4.49372600 | -0.23548800 |
| H  | 0.01640100  | -4.66044900 | -1.73034000 |
| C  | 0.12687200  | -0.25942500 | 2.64599400  |
| H  | 1.11278800  | -0.66443900 | 2.81493900  |
| H  | -0.68701200 | -0.94204700 | 2.85039700  |
| C  | -0.08426800 | 1.08347700  | 2.50214500  |
| H  | -1.07323800 | 1.51984200  | 2.57581900  |
| H  | 0.73927100  | 1.78884200  | 2.51261700  |
| Fe | 0.02873100  | 0.13338500  | 0.47984700  |

**<sup>1/2</sup>Fe(0)-TS4/5**

|   |             |            |             |
|---|-------------|------------|-------------|
| C | 1.23140700  | 2.55638000 | -0.30320000 |
| C | 1.26945600  | 3.92495400 | -0.53384900 |
| C | 0.07525800  | 4.64983800 | -0.62545400 |
| C | -1.13717200 | 3.97983600 | -0.47991900 |
| C | -1.15971200 | 2.60353900 | -0.25184800 |
| N | 0.02854100  | 1.89188100 | -0.16777100 |
| H | 0.09384600  | 5.71831000 | -0.80667500 |
| H | 2.22210000  | 4.42992600 | -0.64565300 |
| H | -2.06739100 | 4.53130400 | -0.55036500 |
| C | 2.36396900  | 1.67920700 | -0.21497100 |
| C | -2.30396900 | 1.76401700 | -0.11948800 |
| N | -2.01870900 | 0.47702600 | 0.09710000  |
| N | 2.06732100  | 0.41009000 | 0.01928900  |
| C | -3.70674500 | 2.28763100 | -0.28187300 |
| H | -3.76201500 | 3.35522900 | -0.06849200 |
| H | -4.07832300 | 2.13957300 | -1.30219500 |
| H | -4.40481400 | 1.77816900 | 0.38399500  |

|   |             |             |             |
|---|-------------|-------------|-------------|
| C | 3.76028800  | 2.20872300  | -0.42600800 |
| H | 3.89388000  | 2.56685600  | -1.45191100 |
| H | 3.96432800  | 3.05437400  | 0.23637900  |
| H | 4.51476100  | 1.44710300  | -0.23999600 |
| C | -3.10365500 | -0.45722600 | 0.04704700  |
| C | -3.49764900 | -0.98160200 | -1.20246100 |
| C | -3.76365600 | -0.86382700 | 1.22609500  |
| C | -4.50336700 | -1.95206200 | -1.24274200 |
| C | -4.77020400 | -1.82875100 | 1.13780600  |
| C | -5.13399900 | -2.38435900 | -0.08342300 |
| H | -4.79723000 | -2.36506300 | -2.20392200 |
| H | -5.28000900 | -2.14059100 | 2.04505600  |
| H | -5.91314700 | -3.13851000 | -0.13144400 |
| C | 3.12609800  | -0.55689000 | -0.00791600 |
| C | 3.83026000  | -0.90333200 | 1.16464600  |
| C | 3.45963800  | -1.16027100 | -1.24013300 |
| C | 4.78226000  | -1.92573300 | 1.09717800  |
| C | 4.41304000  | -2.18123900 | -1.25841600 |
| C | 5.05986200  | -2.58141600 | -0.09578300 |
| H | 5.32369000  | -2.19704700 | 1.99913100  |
| H | 4.65571400  | -2.65753600 | -2.20420300 |
| H | 5.79577600  | -3.37866900 | -0.12399400 |
| C | 3.65088800  | -0.15849300 | 2.46756100  |
| H | 4.53899600  | -0.27590800 | 3.09234800  |
| H | 3.49421700  | 0.90985900  | 2.31002500  |
| H | 2.79886300  | -0.51745000 | 3.04842100  |
| C | 2.86343600  | -0.67909600 | -2.54220000 |
| H | 1.84033400  | -0.32530700 | -2.42597300 |
| H | 3.44509800  | 0.15656900  | -2.94853500 |
| H | 2.87306700  | -1.47091600 | -3.29468800 |
| C | -3.43575900 | -0.25815900 | 2.56924400  |
| H | -2.52482700 | -0.68035300 | 2.99936000  |
| H | -3.27980800 | 0.82042000  | 2.50573100  |
| H | -4.24554600 | -0.44067900 | 3.27909300  |
| C | -2.89651400 | -0.49240700 | -2.49925000 |
| H | -3.49000100 | 0.32651900  | -2.92201400 |
| H | -1.88373100 | -0.11400400 | -2.36948600 |
| H | -2.87591400 | -1.28851100 | -3.24717000 |
| C | -0.27957600 | -2.07218400 | 0.52507000  |
| H | 0.21230600  | -2.90971900 | 1.01926500  |
| H | -1.35297400 | -2.20665100 | 0.64789400  |
| C | 0.10531000  | -2.15398200 | -0.95996900 |
| H | 1.18700500  | -2.24035600 | -1.05319500 |

|                              |             |             |             |
|------------------------------|-------------|-------------|-------------|
| H                            | -0.18672100 | -1.25560600 | -1.52474700 |
| C                            | -0.55455300 | -3.36831100 | -1.63682100 |
| H                            | -0.24776800 | -4.29741500 | -1.14693100 |
| H                            | -1.64420700 | -3.31063900 | -1.58670700 |
| H                            | -0.26525600 | -3.43666700 | -2.69063100 |
| C                            | 0.18324200  | -1.04746800 | 2.20488800  |
| H                            | 1.15386000  | -1.50620200 | 2.34978300  |
| H                            | -0.60158800 | -1.62896100 | 2.67946000  |
| C                            | 0.11235600  | 0.38527100  | 2.31029900  |
| H                            | -0.79109600 | 0.82724000  | 2.71842900  |
| H                            | 1.01657000  | 0.92715400  | 2.56765400  |
| Fe                           | -0.00436700 | 0.12098600  | 0.34430400  |
| <b><sup>1/2</sup>Fe(0)-5</b> |             |             |             |
| C                            | -1.59245500 | 2.86757200  | 0.36872700  |
| C                            | -1.76197500 | 4.23649900  | 0.62943100  |
| C                            | -0.64693500 | 5.05680600  | 0.74612400  |
| C                            | 0.64950500  | 4.52303300  | 0.60290100  |
| C                            | 0.77576200  | 3.16466600  | 0.34712100  |
| N                            | -0.31825800 | 2.37188700  | 0.23826500  |
| H                            | -0.77381700 | 6.11469100  | 0.94805800  |
| H                            | -2.75753700 | 4.65211800  | 0.73928600  |
| H                            | 1.52042600  | 5.16113600  | 0.69189100  |
| C                            | -2.58732000 | 1.85340400  | 0.20485800  |
| C                            | 2.00889100  | 2.40285800  | 0.16349100  |
| N                            | 1.83841800  | 1.12023900  | -0.06365400 |
| N                            | -2.10014400 | 0.62525300  | -0.05296500 |
| C                            | 3.34215700  | 3.09300800  | 0.23962500  |
| H                            | 3.37909700  | 3.93264800  | -0.46026100 |
| H                            | 3.50646700  | 3.50563400  | 1.24003900  |
| H                            | 4.16392700  | 2.41797800  | 0.01038700  |
| C                            | -4.05195600 | 2.18325100  | 0.30176700  |
| H                            | -4.29184100 | 2.65741400  | 1.25932700  |
| H                            | -4.35357100 | 2.88454100  | -0.48447100 |
| H                            | -4.67172000 | 1.29361000  | 0.20564400  |
| C                            | 2.97584000  | 0.26581300  | -0.24171400 |
| C                            | 3.58871800  | -0.30835700 | 0.88533100  |
| C                            | 3.41853800  | -0.01987700 | -1.54481000 |
| C                            | 4.66461600  | -1.17634400 | 0.68253800  |
| C                            | 4.49939100  | -0.89067700 | -1.70007200 |
| C                            | 5.12054000  | -1.46811700 | -0.59801900 |
| H                            | 5.14460400  | -1.63086000 | 1.54419400  |
| H                            | 4.85152900  | -1.12035700 | -2.70136100 |
| H                            | 5.95486600  | -2.14800000 | -0.73728000 |

|    |             |             |             |
|----|-------------|-------------|-------------|
| C  | -2.99877800 | -0.47298600 | -0.21461400 |
| C  | -3.40413600 | -0.85008000 | -1.50826300 |
| C  | -3.42877600 | -1.19181200 | 0.91656400  |
| C  | -4.24910300 | -1.95322800 | -1.64989800 |
| C  | -4.27192700 | -2.29014800 | 0.73068600  |
| C  | -4.68296100 | -2.67240100 | -0.54153300 |
| H  | -4.56594200 | -2.25124500 | -2.64533200 |
| H  | -4.60609600 | -2.85227400 | 1.59819900  |
| H  | -5.33572100 | -3.53025600 | -0.66901200 |
| C  | -2.92986100 | -0.08413800 | -2.71682400 |
| H  | -3.23707600 | 0.96561100  | -2.68375900 |
| H  | -1.83768200 | -0.08891700 | -2.78095300 |
| H  | -3.32674500 | -0.51980900 | -3.63605300 |
| C  | -2.99504100 | -0.78369100 | 2.30225700  |
| H  | -1.90869900 | -0.68034000 | 2.36621400  |
| H  | -3.41857000 | 0.18262600  | 2.59542800  |
| H  | -3.31163600 | -1.52063600 | 3.04311600  |
| C  | 2.75211000  | 0.60459100  | -2.74486100 |
| H  | 1.67812800  | 0.39980900  | -2.75653100 |
| H  | 2.86686900  | 1.69347300  | -2.75729100 |
| H  | 3.17865400  | 0.21743900  | -3.67195200 |
| C  | 3.10769100  | 0.00535800  | 2.28073300  |
| H  | 3.35120400  | 1.03154600  | 2.57704000  |
| H  | 2.02365100  | -0.09989200 | 2.36815500  |
| H  | 3.57088600  | -0.66208100 | 3.00958500  |
| C  | 0.11660500  | -1.45234100 | -0.64560400 |
| H  | -0.77331900 | -1.81767800 | -1.17414900 |
| H  | 0.94809100  | -1.51828900 | -1.36615200 |
| C  | 0.40841700  | -2.40743600 | 0.52359100  |
| H  | -0.42171400 | -2.37889700 | 1.24280300  |
| H  | 1.29812000  | -2.07863800 | 1.07732700  |
| C  | 0.62670600  | -3.87041300 | 0.10109200  |
| H  | -0.25356600 | -4.21325200 | -0.45848300 |
| H  | 1.46787600  | -3.91577500 | -0.60328400 |
| C  | 0.88995400  | -4.82700500 | 1.26934100  |
| H  | 1.76737300  | -4.48104700 | 1.83106300  |
| H  | 0.04763800  | -4.78115000 | 1.97168300  |
| C  | 1.10724800  | -6.27823600 | 0.83270100  |
| H  | 1.28898700  | -6.93644100 | 1.68805800  |
| H  | 0.23449700  | -6.66674400 | 0.29786900  |
| H  | 1.96692100  | -6.36672600 | 0.16047700  |
| Fe | -0.11590200 | 0.49115100  | -0.14873300 |



**$1/2\text{Fe(0)}-6$** 

|   |             |             |             |
|---|-------------|-------------|-------------|
| C | -1.05787400 | 2.68836000  | -0.23919500 |
| C | -1.01229400 | 4.07392500  | -0.44785200 |
| C | 0.21138000  | 4.71764600  | -0.55496600 |
| C | 1.39611800  | 3.96321500  | -0.47561800 |
| C | 1.31355400  | 2.59684300  | -0.25882300 |
| N | 0.10984000  | 1.97307100  | -0.11032600 |
| H | 0.25645000  | 5.78848800  | -0.71731200 |
| H | -1.93429900 | 4.63807600  | -0.53224500 |
| H | 2.35835800  | 4.44664300  | -0.59359900 |
| C | -2.22596200 | 1.86276400  | -0.19167600 |
| C | 2.44607500  | 1.67345600  | -0.22079600 |
| N | 2.14478600  | 0.41983600  | -0.02017500 |
| N | -1.98697600 | 0.56537100  | 0.00082100  |
| C | 3.84032300  | 2.19871300  | -0.44952400 |
| H | 3.91196300  | 2.69631300  | -1.42078900 |
| H | 4.10274000  | 2.94101300  | 0.30987400  |
| H | 4.58098200  | 1.40288500  | -0.41934700 |
| C | -3.59231600 | 2.46334000  | -0.40591700 |
| H | -3.82184700 | 3.21025800  | 0.36111500  |
| H | -3.65551300 | 2.97086400  | -1.37393600 |
| H | -4.37390300 | 1.70676500  | -0.37752900 |
| C | 3.17523100  | -0.57664900 | -0.07438100 |
| C | 3.90386300  | -0.92509800 | 1.07807800  |
| C | 3.41432700  | -1.21973400 | -1.30476600 |
| C | 4.84844600  | -1.95141300 | 0.98193800  |
| C | 4.36700200  | -2.23928200 | -1.35237200 |
| C | 5.07669100  | -2.61392100 | -0.21765300 |
| H | 5.41420700  | -2.22756600 | 1.86694600  |
| H | 4.55078800  | -2.74328600 | -2.29654600 |
| H | 5.81001700  | -3.41218900 | -0.26980300 |
| C | -3.08751500 | -0.34886900 | -0.06680600 |
| C | -3.39431400 | -0.94898900 | -1.30435400 |
| C | -3.84406400 | -0.64939100 | 1.08290900  |
| C | -4.41128700 | -1.90499700 | -1.35395800 |
| C | -4.85418400 | -1.61066800 | 0.98701700  |
| C | -5.13049300 | -2.24974200 | -0.21572600 |
| H | -4.64074600 | -2.38104700 | -2.30294500 |
| H | -5.43429400 | -1.85371000 | 1.87266400  |
| H | -5.91200600 | -3.00102500 | -0.26865800 |
| C | -2.68224800 | -0.53869300 | -2.56975200 |
| H | -2.99393800 | 0.46034300  | -2.89532900 |
| H | -1.60089000 | -0.50305000 | -2.43765500 |

|    |             |             |             |
|----|-------------|-------------|-------------|
| H  | -2.90524000 | -1.23107400 | -3.38404700 |
| C  | -3.62816400 | 0.07897100  | 2.38743000  |
| H  | -2.61157100 | -0.02796100 | 2.76597100  |
| H  | -3.81231200 | 1.15317900  | 2.28411300  |
| H  | -4.30891300 | -0.29604500 | 3.15423900  |
| C  | 2.67980300  | -0.80565300 | -2.55523200 |
| H  | 1.59791300  | -0.85463000 | -2.42011700 |
| H  | 2.91970100  | 0.22250300  | -2.84665900 |
| H  | 2.94511300  | -1.45403900 | -3.39227700 |
| C  | 3.71237800  | -0.21093100 | 2.39418300  |
| H  | 3.76410200  | 0.87596700  | 2.28658100  |
| H  | 2.74622700  | -0.43868200 | 2.84880200  |
| H  | 4.48579200  | -0.50652300 | 3.10557500  |
| C  | 0.01005700  | -1.86708100 | -0.26111300 |
| H  | -0.24501700 | -1.74354400 | -1.33036300 |
| H  | 1.05940300  | -2.19018200 | -0.24441000 |
| C  | -0.83665600 | -3.01418200 | 0.29612200  |
| H  | -1.88817100 | -2.72209900 | 0.37516900  |
| H  | -0.51349600 | -3.24812600 | 1.31861500  |
| C  | -0.74901600 | -4.30408000 | -0.53360700 |
| H  | -1.11624400 | -4.14361700 | -1.55289200 |
| H  | 0.28561500  | -4.65520600 | -0.61167200 |
| H  | -1.34307200 | -5.11314100 | -0.09290500 |
| C  | -0.01305800 | -0.74477400 | 2.24263900  |
| H  | -0.96836500 | -1.23313500 | 2.37714000  |
| H  | 0.84225400  | -1.40688500 | 2.31221200  |
| C  | 0.13137100  | 0.62114300  | 2.38274100  |
| H  | 1.09728800  | 1.07983000  | 2.55352800  |
| H  | -0.72184200 | 1.26155100  | 2.57660000  |
| Fe | 0.00600700  | 0.09764400  | 0.29407100  |

 **$^{1/2}\text{Fe(0)}\text{-TS6/7}$** 

|   |             |            |             |
|---|-------------|------------|-------------|
| C | -1.07185100 | 2.72080800 | -0.13729800 |
| C | -1.06297200 | 4.10860800 | -0.24037600 |
| C | 0.15084700  | 4.79573400 | -0.29691700 |
| C | 1.33989000  | 4.06626200 | -0.25065200 |
| C | 1.30011000  | 2.67957800 | -0.14728000 |
| N | 0.10058200  | 1.99823000 | -0.08798500 |
| H | 0.16943400  | 5.87644200 | -0.37660800 |
| H | -1.99870000 | 4.65453000 | -0.27691700 |
| H | 2.29499800  | 4.57735100 | -0.29519200 |
| C | -2.23964400 | 1.88241200 | -0.07533200 |
| C | 2.43227300  | 1.79561800 | -0.09104000 |
| N | 2.11629700  | 0.51834600 | 0.00172600  |

|   |             |             |             |
|---|-------------|-------------|-------------|
| N | -1.99385700 | 0.58946800  | 0.01816100  |
| C | 3.83598400  | 2.33965100  | -0.13852200 |
| H | 4.00570100  | 2.90535800  | -1.05984100 |
| H | 4.01924600  | 3.02371900  | 0.69587500  |
| H | 4.57820100  | 1.54563600  | -0.09029300 |
| C | -3.61312700 | 2.50362500  | -0.12618100 |
| H | -4.40165500 | 1.75631600  | -0.07688500 |
| H | -3.75716800 | 3.20137600  | 0.70435200  |
| H | -3.74785400 | 3.07515000  | -1.04951800 |
| C | 3.16996200  | -0.45083200 | 0.07125000  |
| C | 3.68795700  | -0.82583800 | 1.32715900  |
| C | 3.66811100  | -1.02630200 | -1.11416700 |
| C | 4.64231000  | -1.84509700 | 1.37934200  |
| C | 4.62352800  | -2.04147500 | -1.01388700 |
| C | 5.09860400  | -2.46452500 | 0.22167700  |
| H | 5.03520400  | -2.14825500 | 2.34579600  |
| H | 5.00129700  | -2.49921600 | -1.92392400 |
| H | 5.83235700  | -3.26220600 | 0.28133700  |
| C | -3.12255700 | -0.29623800 | 0.07314700  |
| C | -3.67305400 | -0.79860900 | -1.12147900 |
| C | -3.68186200 | -0.63784600 | 1.31991800  |
| C | -4.73186900 | -1.70774800 | -1.04235700 |
| C | -4.74079300 | -1.54877500 | 1.35317900  |
| C | -5.25683700 | -2.09641900 | 0.18412500  |
| H | -5.15075500 | -2.10835000 | -1.96120200 |
| H | -5.16762600 | -1.82417400 | 2.31334500  |
| H | -6.07436800 | -2.80897400 | 0.22833700  |
| C | -3.19050600 | -0.32459600 | -2.47051000 |
| H | -3.63558200 | 0.64398800  | -2.72671300 |
| H | -2.11014000 | -0.19165000 | -2.49904800 |
| H | -3.47337400 | -1.02703800 | -3.25729800 |
| C | -3.20378500 | 0.00658100  | 2.59774900  |
| H | -3.60379100 | -0.51388100 | 3.47020600  |
| H | -2.11716200 | 0.01745400  | 2.67457300  |
| H | -3.53356200 | 1.04964400  | 2.66175200  |
| C | 3.26076000  | -0.51862000 | -2.47736100 |
| H | 3.93122500  | 0.28482300  | -2.80588400 |
| H | 3.32092500  | -1.31219300 | -3.22547800 |
| H | 2.24847300  | -0.11903200 | -2.48735100 |
| C | 3.30332500  | -0.09801500 | 2.59390400  |
| H | 3.95448400  | 0.77017100  | 2.75218400  |
| H | 2.27887100  | 0.26920800  | 2.56975800  |
| H | 3.41336300  | -0.74530600 | 3.46671600  |

|    |             |             |             |
|----|-------------|-------------|-------------|
| C  | 0.12953900  | -1.52264100 | -1.27099200 |
| H  | -0.19430400 | -0.89627800 | -2.11302000 |
| H  | 1.17542200  | -1.80187700 | -1.38557600 |
| C  | -0.72599500 | -2.67439800 | -1.04878100 |
| H  | -1.75682300 | -2.57890600 | -1.38812900 |
| H  | -0.94054400 | -2.66366000 | 0.25956000  |
| C  | -0.16654200 | -4.07296000 | -1.23478900 |
| H  | -0.02439600 | -4.29155600 | -2.29983600 |
| H  | 0.80989800  | -4.17474000 | -0.75174600 |
| H  | -0.83175100 | -4.84112200 | -0.82694600 |
| C  | -0.71071700 | -2.45429700 | 1.56151100  |
| H  | -1.73167100 | -2.36966500 | 1.92506500  |
| H  | -0.27744900 | -3.43391300 | 1.77032900  |
| C  | 0.14943400  | -1.30154500 | 1.61845800  |
| H  | 1.19737500  | -1.54716300 | 1.76089300  |
| H  | -0.17903400 | -0.52024900 | 2.31528200  |
| Fe | 0.08757400  | 0.12051200  | 0.04376000  |

 **$1/2\text{Fe(0)}-7$** 

|   |             |             |             |
|---|-------------|-------------|-------------|
| C | -1.25796700 | 2.52191400  | -0.11554800 |
| C | -1.30736500 | 3.90526500  | -0.23263900 |
| C | -0.11549600 | 4.63567000  | -0.31209600 |
| C | 1.10179100  | 3.95660600  | -0.31194400 |
| C | 1.12169200  | 2.56650800  | -0.19406200 |
| N | -0.05329600 | 1.87151000  | -0.03627900 |
| H | -0.14043300 | 5.71512800  | -0.40627800 |
| H | -2.26289200 | 4.41464800  | -0.28235500 |
| H | 2.02926600  | 4.50761500  | -0.41447100 |
| C | -2.38369100 | 1.62056200  | -0.15327500 |
| C | 2.26292900  | 1.70372100  | -0.28334600 |
| N | 1.97079400  | 0.40692500  | -0.23753500 |
| N | -2.05870000 | 0.34203300  | -0.15401700 |
| C | 3.65520100  | 2.25660900  | -0.43773900 |
| H | 4.32983200  | 1.52346500  | -0.87815100 |
| H | 3.66203500  | 3.14343400  | -1.07400100 |
| H | 4.07728800  | 2.54877500  | 0.53030200  |
| C | -3.79163900 | 2.15099600  | -0.24309000 |
| H | -4.00967500 | 2.82887400  | 0.58690600  |
| H | -3.94012400 | 2.71652700  | -1.16832800 |
| H | -4.52400600 | 1.34655700  | -0.22577700 |
| C | 3.02383900  | -0.54313800 | -0.42236400 |
| C | 3.84774900  | -0.93193000 | 0.65085900  |
| C | 3.20268600  | -1.09592300 | -1.70746400 |
| C | 4.83122400  | -1.89857500 | 0.42116000  |

|   |             |             |             |
|---|-------------|-------------|-------------|
| C | 4.19711200  | -2.05933700 | -1.89102100 |
| C | 5.00597400  | -2.46595000 | -0.83539300 |
| H | 5.46487400  | -2.20969500 | 1.24687700  |
| H | 4.33740400  | -2.49150300 | -2.87764900 |
| H | 5.77050400  | -3.22023300 | -0.99244800 |
| C | -3.07413000 | -0.64709300 | -0.34820900 |
| C | -3.31584800 | -1.09805300 | -1.66228000 |
| C | -3.78433900 | -1.18577200 | 0.74171300  |
| C | -4.25507300 | -2.11254400 | -1.86086200 |
| C | -4.71328500 | -2.20072100 | 0.49590600  |
| C | -4.94724700 | -2.66921100 | -0.79155700 |
| H | -4.44192000 | -2.46786400 | -2.87010700 |
| H | -5.26119700 | -2.62438300 | 1.33262100  |
| H | -5.66820600 | -3.46253600 | -0.96127100 |
| C | -2.59906800 | -0.48142400 | -2.83834200 |
| H | -2.93503500 | 0.54492300  | -3.02159300 |
| H | -1.52028500 | -0.42772600 | -2.67521700 |
| H | -2.78235900 | -1.05395700 | -3.74965100 |
| C | -3.59080000 | -0.65744500 | 2.14041900  |
| H | -4.04029400 | 0.33513700  | 2.25858400  |
| H | -4.06053200 | -1.31555300 | 2.87403600  |
| H | -2.53752900 | -0.55342000 | 2.39540200  |
| C | 2.37155900  | -0.62553000 | -2.87521400 |
| H | 1.30915500  | -0.58869300 | -2.62713800 |
| H | 2.65252300  | 0.38806300  | -3.18202200 |
| H | 2.50597200  | -1.27956900 | -3.73920600 |
| C | 3.70253900  | -0.31521400 | 2.01985800  |
| H | 4.23404300  | 0.64104500  | 2.08386900  |
| H | 2.66033100  | -0.12017700 | 2.26907600  |
| H | 4.12431200  | -0.96806500 | 2.78691200  |
| C | -0.05009000 | -1.95708000 | -0.39134600 |
| H | -0.95156700 | -1.95942700 | -0.99027800 |
| H | 0.86715000  | -2.19677200 | -0.91921300 |
| C | -0.10221300 | -2.11143900 | 0.97776700  |
| H | -1.07933800 | -2.15305900 | 1.45043300  |
| H | -0.74248200 | -1.09780300 | 3.64947700  |
| C | 1.00958100  | -2.77943400 | 1.74676200  |
| H | 0.77513300  | -3.84703000 | 1.85376300  |
| H | 1.96265500  | -2.71306500 | 1.22145800  |
| H | 1.13993700  | -2.38413400 | 2.75229400  |
| C | -0.04780200 | -0.25144500 | 3.67379100  |
| H | -0.31624600 | 0.34459900  | 4.55851500  |
| H | 0.94405500  | -0.66425400 | 3.87820400  |

|                                       |             |             |             |
|---------------------------------------|-------------|-------------|-------------|
| C                                     | -0.07366500 | 0.59600700  | 2.40233300  |
| H                                     | 0.73297700  | 1.33918200  | 2.45743300  |
| H                                     | -0.99837100 | 1.18741800  | 2.38464600  |
| Fe                                    | 0.00294200  | 0.03733200  | 0.35778800  |
| <b><math>1/2\text{Fe(0)}-8</math></b> |             |             |             |
| C                                     | -1.17222700 | 2.56372500  | 0.01841700  |
| C                                     | -1.21328700 | 3.95004900  | 0.05848600  |
| C                                     | 0.00951300  | 4.64957300  | 0.08592900  |
| C                                     | 1.21526400  | 3.96131000  | 0.07148400  |
| C                                     | 1.21743200  | 2.55663700  | 0.02945400  |
| N                                     | 0.00981600  | 1.90072400  | 0.00604900  |
| H                                     | 0.00898300  | 5.73350600  | 0.11923100  |
| H                                     | -2.15517600 | 4.48507400  | 0.07014700  |
| H                                     | 2.14781600  | 4.51283500  | 0.09531100  |
| C                                     | -2.30640300 | 1.64268100  | -0.01262500 |
| C                                     | 2.32078300  | 1.64457300  | 0.00717700  |
| N                                     | 1.97529800  | 0.34406600  | -0.03670100 |
| N                                     | -1.98646000 | 0.36900900  | -0.04172500 |
| C                                     | 3.75245800  | 2.10143700  | 0.02213700  |
| H                                     | 3.82760800  | 3.18851800  | 0.03183300  |
| H                                     | 4.28889400  | 1.72283400  | 0.89739000  |
| H                                     | 4.29766300  | 1.73695600  | -0.85371900 |
| C                                     | -3.71161000 | 2.17627100  | -0.00963600 |
| H                                     | -3.90884100 | 2.73612700  | 0.90990500  |
| H                                     | -3.85999000 | 2.87004300  | -0.84214900 |
| H                                     | -4.44880000 | 1.38043500  | -0.08998500 |
| C                                     | 3.01005400  | -0.64089000 | -0.03909400 |
| C                                     | 3.49774900  | -1.13664500 | 1.18444100  |
| C                                     | 3.49122800  | -1.13794400 | -1.26447500 |
| C                                     | 4.48785900  | -2.12179900 | 1.16000300  |
| C                                     | 4.48264500  | -2.12184100 | -1.24430200 |
| C                                     | 4.98367400  | -2.61157300 | -0.04320800 |
| H                                     | 4.86843500  | -2.51173400 | 2.09985700  |
| H                                     | 4.85942500  | -2.51134600 | -2.18584400 |
| H                                     | 5.75133500  | -3.37902500 | -0.04484800 |
| C                                     | -3.01609800 | -0.62861300 | -0.06148100 |
| C                                     | -3.43153800 | -1.15722100 | -1.29587900 |
| C                                     | -3.54941900 | -1.09180700 | 1.15340900  |
| C                                     | -4.40222500 | -2.16114400 | -1.29202500 |
| C                                     | -4.51583000 | -2.09977300 | 1.10979600  |
| C                                     | -4.94260500 | -2.63331100 | -0.10078500 |
| H                                     | -4.73146400 | -2.57949400 | -2.23855200 |
| H                                     | -4.93231000 | -2.47109800 | 2.04153000  |

|    |             |             |             |
|----|-------------|-------------|-------------|
| H  | -5.69054500 | -3.41949900 | -0.11596200 |
| C  | -2.85341400 | -0.64681700 | -2.59184700 |
| H  | -3.10002000 | 0.40608100  | -2.76412100 |
| H  | -1.76260500 | -0.72066300 | -2.59890500 |
| H  | -3.23540800 | -1.21791600 | -3.43992600 |
| C  | -3.10308000 | -0.51235600 | 2.47331000  |
| H  | -2.01497000 | -0.43766400 | 2.53556800  |
| H  | -3.49965800 | 0.49686000  | 2.63084700  |
| H  | -3.44783400 | -1.12994100 | 3.30461500  |
| C  | 2.93449700  | -0.63463900 | -2.57226100 |
| H  | 1.85630800  | -0.81075500 | -2.63219100 |
| H  | 3.08136300  | 0.44230400  | -2.69938000 |
| H  | 3.40870500  | -1.13764700 | -3.41755100 |
| C  | 2.95677700  | -0.62591300 | 2.49682300  |
| H  | 3.20273500  | 0.42747400  | 2.66602100  |
| H  | 1.86647100  | -0.69879900 | 2.53109500  |
| H  | 3.36236100  | -1.19752100 | 3.33408700  |
| C  | 0.03049100  | -2.04052000 | -0.26652500 |
| H  | -0.76044700 | -2.30962100 | -0.98445800 |
| H  | 0.97345300  | -2.37656500 | -0.71410200 |
| C  | -0.19891400 | -2.83189400 | 1.03271100  |
| H  | -1.14592100 | -2.57520000 | 1.51889600  |
| H  | 0.59979100  | -2.65545700 | 1.76170700  |
| H  | -0.22696100 | -3.91725600 | 0.86118300  |
| Fe | 0.02640000  | -0.03260700 | -0.07451900 |

**<sup>1/2</sup>Fe(0)- TS3/9**

|   |             |            |             |
|---|-------------|------------|-------------|
| C | 1.14556200  | 2.57139800 | 0.00522100  |
| C | 1.14749500  | 3.96442600 | 0.00843600  |
| C | -0.06356900 | 4.65774900 | -0.03115500 |
| C | -1.26483600 | 3.94119100 | -0.04224200 |
| C | -1.23424900 | 2.55092100 | -0.04365100 |
| N | -0.03802900 | 1.87540300 | -0.05956800 |
| H | -0.07360400 | 5.74171900 | -0.03210000 |
| H | 2.08506500  | 4.50734600 | 0.04545200  |
| H | -2.21312300 | 4.46640600 | -0.04231000 |
| C | 2.28214900  | 1.69477700 | 0.08963100  |
| C | -2.36216200 | 1.65359900 | 0.00616300  |
| N | -2.03498600 | 0.37476900 | 0.04819300  |
| N | 1.97463600  | 0.40530600 | 0.09166500  |
| C | -3.77053400 | 2.18435900 | 0.02013200  |
| H | -3.88799400 | 2.96317100 | 0.77855200  |
| H | -4.03070000 | 2.63440000 | -0.94400300 |
| H | -4.49480200 | 1.39876100 | 0.22762900  |

|   |             |             |             |
|---|-------------|-------------|-------------|
| C | 3.67790600  | 2.25054400  | 0.18755300  |
| H | 4.00111900  | 2.68494900  | -0.76497600 |
| H | 3.72910700  | 3.04633900  | 0.93537100  |
| H | 4.39940200  | 1.48343800  | 0.46322400  |
| C | -3.06814700 | -0.61175600 | 0.11143500  |
| C | -3.69126400 | -1.05783400 | -1.06955600 |
| C | -3.41445700 | -1.15394900 | 1.36464000  |
| C | -4.65017900 | -2.07084800 | -0.97461300 |
| C | -4.38169000 | -2.15994000 | 1.41265200  |
| C | -4.99448800 | -2.62344200 | 0.25309600  |
| H | -5.13089300 | -2.42696100 | -1.88138100 |
| H | -4.65462400 | -2.58375800 | 2.37476500  |
| H | -5.73829900 | -3.41202600 | 0.30715900  |
| C | 3.03340600  | -0.55270400 | 0.16739400  |
| C | 3.31776100  | -1.15683900 | 1.40797800  |
| C | 3.75647300  | -0.89951200 | -0.98944900 |
| C | 4.31860100  | -2.12907100 | 1.46410200  |
| C | 4.74848100  | -1.87941300 | -0.88753500 |
| C | 5.02884500  | -2.49636000 | 0.32575400  |
| H | 4.54272000  | -2.60078100 | 2.41652000  |
| H | 5.30463900  | -2.15961100 | -1.77774700 |
| H | 5.79943400  | -3.25843900 | 0.38549600  |
| C | 2.58436500  | -0.73776100 | 2.65726800  |
| H | 2.80010700  | 0.30323300  | 2.91982900  |
| H | 1.50178200  | -0.80960300 | 2.52808300  |
| H | 2.87254200  | -1.36039200 | 3.50673700  |
| C | 3.49052300  | -0.22509900 | -2.31370400 |
| H | 2.43018000  | -0.01176100 | -2.45413100 |
| H | 4.02377500  | 0.72922200  | -2.38963000 |
| H | 3.83041800  | -0.84931800 | -3.14292600 |
| C | -2.78417300 | -0.63373000 | 2.63270900  |
| H | -1.69363900 | -0.62711100 | 2.56768000  |
| H | -3.09059900 | 0.39694600  | 2.84095700  |
| H | -3.07342200 | -1.24356900 | 3.49090100  |
| C | -3.36422700 | -0.44564500 | -2.41057700 |
| H | -3.91795200 | 0.48709600  | -2.56840500 |
| H | -2.30429400 | -0.20414900 | -2.50157800 |
| H | -3.63713800 | -1.12194900 | -3.22358300 |
| C | -0.01469800 | -2.02019400 | 0.39832400  |
| H | 0.93855700  | -2.39054400 | 0.76548700  |
| H | -0.86741100 | -2.23815800 | 1.03455200  |
| C | -0.21657300 | -1.95772400 | -0.99750500 |
| H | -0.06690900 | -0.41816500 | -1.55162900 |



|                                       |             |             |             |
|---------------------------------------|-------------|-------------|-------------|
| H                                     | -1.24745700 | -2.03364100 | -1.33046100 |
| C                                     | 0.75655000  | -2.57948200 | -1.97765300 |
| H                                     | 1.78956900  | -2.48143000 | -1.64599900 |
| H                                     | 0.53823800  | -3.65116000 | -2.05357800 |
| H                                     | 0.67076000  | -2.15046900 | -2.97984800 |
| Fe                                    | -0.02012000 | 0.00521800  | -0.05827800 |
| <b><math>1/2\text{Fe(0)}-9</math></b> |             |             |             |
| C                                     | 1.14655800  | 2.57287200  | -0.02507900 |
| C                                     | 1.15212200  | 3.96407300  | -0.06984400 |
| C                                     | -0.06055000 | 4.65663200  | -0.12341000 |
| C                                     | -1.26042100 | 3.94108200  | -0.11955800 |
| C                                     | -1.23034400 | 2.55008800  | -0.07279700 |
| N                                     | -0.03490700 | 1.87836800  | -0.03862500 |
| H                                     | -0.07008700 | 5.73999900  | -0.16112300 |
| H                                     | 2.09060200  | 4.50642200  | -0.06495500 |
| H                                     | -2.20902600 | 4.46492700  | -0.15061900 |
| C                                     | 2.28810900  | 1.69620000  | 0.04660200  |
| C                                     | -2.35823500 | 1.65496900  | -0.03051500 |
| N                                     | -2.03266600 | 0.37457400  | 0.02441400  |
| N                                     | 1.98357700  | 0.41006500  | 0.07135500  |
| C                                     | -3.76489800 | 2.19059900  | -0.04325100 |
| H                                     | -3.92146300 | 2.90577400  | 0.76999100  |
| H                                     | -3.97369200 | 2.72000100  | -0.97882600 |
| H                                     | -4.50041200 | 1.39547200  | 0.06148000  |
| C                                     | 3.68510500  | 2.25571500  | 0.08431200  |
| H                                     | 3.76744000  | 3.05399800  | 0.82684900  |
| H                                     | 4.42065900  | 1.49109100  | 0.32694900  |
| H                                     | 3.96184100  | 2.68851100  | -0.88340200 |
| C                                     | -3.07546600 | -0.60274200 | 0.09100900  |
| C                                     | -3.62414100 | -1.11718500 | -1.10026000 |
| C                                     | -3.50749300 | -1.06646300 | 1.34813900  |
| C                                     | -4.59257100 | -2.12015800 | -1.00861600 |
| C                                     | -4.47718100 | -2.07182700 | 1.39211600  |
| C                                     | -5.01576900 | -2.60191700 | 0.22530800  |
| H                                     | -5.01675300 | -2.52714000 | -1.92209500 |
| H                                     | -4.81270300 | -2.43918100 | 2.35778600  |
| H                                     | -5.76359100 | -3.38687600 | 0.27722900  |
| C                                     | 3.04891400  | -0.54303500 | 0.13276800  |
| C                                     | 3.44493200  | -1.05071800 | 1.38511900  |
| C                                     | 3.66678600  | -0.97695600 | -1.05505200 |
| C                                     | 4.44780000  | -2.02281500 | 1.42515500  |
| C                                     | 4.66658200  | -1.94965300 | -0.96787900 |
| C                                     | 5.05428800  | -2.47682000 | 0.25896900  |

|    |             |             |             |
|----|-------------|-------------|-------------|
| H  | 4.75582800  | -2.42392400 | 2.38650200  |
| H  | 5.14349800  | -2.29674400 | -1.88011600 |
| H  | 5.82823900  | -3.23632000 | 0.30663200  |
| C  | 2.83298400  | -0.52832200 | 2.66153500  |
| H  | 3.15478300  | 0.49808800  | 2.86902700  |
| H  | 1.74227300  | -0.50675700 | 2.60936900  |
| H  | 3.12533000  | -1.14290000 | 3.51541000  |
| C  | 3.27665200  | -0.39717700 | -2.39210900 |
| H  | 2.19741200  | -0.25669400 | -2.46721100 |
| H  | 3.73950200  | 0.58358800  | -2.55154200 |
| H  | 3.60460800  | -1.04511600 | -3.20782200 |
| C  | -2.98094700 | -0.46193000 | 2.62743000  |
| H  | -1.90170500 | -0.30234700 | 2.59424100  |
| H  | -3.43418300 | 0.51684500  | 2.82151800  |
| H  | -3.20800700 | -1.10048900 | 3.48363500  |
| C  | -3.19599800 | -0.58436600 | -2.44546100 |
| H  | -3.65848300 | 0.38746200  | -2.65349500 |
| H  | -2.11578900 | -0.43486600 | -2.49348100 |
| H  | -3.49529700 | -1.26350700 | -3.24665500 |
| C  | 0.04749300  | -1.98420700 | 0.72646400  |
| H  | 1.04068800  | -2.22726700 | 1.08919700  |
| H  | -0.73664500 | -1.94450000 | 1.47659400  |
| C  | -0.26777800 | -2.16576800 | -0.59781600 |
| H  | 0.00246100  | -0.06158100 | -1.58140700 |
| H  | -1.31586100 | -2.18461300 | -0.87267900 |
| C  | 0.65116100  | -2.78500600 | -1.61419800 |
| H  | 1.69941800  | -2.71961900 | -1.32306000 |
| H  | 0.40521500  | -3.85039600 | -1.71748200 |
| H  | 0.53461800  | -2.32973000 | -2.60016400 |
| Fe | -0.01842000 | 0.00909100  | -0.07118400 |

 **$1/2\text{Fe(0)}-10$** 

|   |             |            |             |
|---|-------------|------------|-------------|
| C | -1.19400700 | 2.40081300 | 0.06691000  |
| C | -1.19496400 | 3.79911800 | 0.06931300  |
| C | 0.01259400  | 4.48737000 | -0.04114600 |
| C | 1.22700900  | 3.78303600 | -0.14191500 |
| C | 1.19397600  | 2.39696500 | -0.12709400 |
| N | 0.00419400  | 1.74026900 | -0.03352800 |
| H | 0.01676900  | 5.57142800 | -0.04483100 |
| H | -2.12377400 | 4.35162900 | 0.15190800  |
| H | 2.16549000  | 4.31942800 | -0.22067500 |
| C | -2.30304500 | 1.48351800 | 0.13747500  |
| C | 2.31921700  | 1.46932700 | -0.16772600 |
| N | 1.98951200  | 0.19794800 | -0.07800800 |

|   |             |             |             |
|---|-------------|-------------|-------------|
| N | -1.96248700 | 0.19514400  | 0.06922900  |
| C | 3.72785300  | 1.98056700  | -0.28523500 |
| H | 3.81303000  | 2.68897700  | -1.11344500 |
| H | 4.02750100  | 2.51278700  | 0.62353300  |
| H | 4.43558300  | 1.17051300  | -0.45023300 |
| C | -3.72697100 | 1.95110800  | 0.24901900  |
| H | -4.24868000 | 1.88272600  | -0.71186100 |
| H | -4.28911100 | 1.33504300  | 0.95354300  |
| H | -3.78404900 | 2.98720000  | 0.58323300  |
| C | 2.99145400  | -0.82467000 | -0.04376200 |
| C | 3.62286500  | -1.13561600 | 1.17291900  |
| C | 3.26731000  | -1.54488600 | -1.21871500 |
| C | 4.56396000  | -2.16789400 | 1.18460800  |
| C | 4.21913100  | -2.56445500 | -1.16238000 |
| C | 4.86884800  | -2.87540400 | 0.02734300  |
| H | 5.05550200  | -2.42220100 | 2.11918900  |
| H | 4.44301500  | -3.12674700 | -2.06416600 |
| H | 5.60173900  | -3.67542900 | 0.05505900  |
| C | -2.97924900 | -0.81018100 | 0.06272900  |
| C | -3.57151900 | -1.18877000 | -1.15525700 |
| C | -3.32599400 | -1.44386300 | 1.26920000  |
| C | -4.54416500 | -2.19107300 | -1.13854000 |
| C | -4.30531300 | -2.43887600 | 1.24141300  |
| C | -4.91800600 | -2.80968400 | 0.04935100  |
| H | -5.00566300 | -2.49418500 | -2.07409100 |
| H | -4.58147800 | -2.93359100 | 2.16822000  |
| H | -5.67505000 | -3.58756200 | 0.04421500  |
| C | -3.13686800 | -0.56284200 | -2.45699900 |
| H | -3.35450100 | 0.50892200  | -2.50233800 |
| H | -2.05740800 | -0.66892300 | -2.59913100 |
| H | -3.63957800 | -1.03624600 | -3.30271600 |
| C | -2.62960300 | -1.08015300 | 2.55498500  |
| H | -1.55414600 | -1.26984200 | 2.47498900  |
| H | -2.74566000 | -0.02179500 | 2.80806500  |
| H | -3.01739600 | -1.66772800 | 3.38961800  |
| C | 2.52897400  | -1.24295700 | -2.49654800 |
| H | 1.45337200  | -1.40236600 | -2.36362100 |
| H | 2.66093500  | -0.20558100 | -2.81900700 |
| H | 2.86891900  | -1.89034200 | -3.30714700 |
| C | 3.27485000  | -0.39934000 | 2.44288900  |
| H | 3.62172700  | 0.63941300  | 2.43102700  |
| H | 2.19324100  | -0.37083300 | 2.59994500  |
| H | 3.73059100  | -0.88368400 | 3.30845800  |

|                                          |             |             |             |
|------------------------------------------|-------------|-------------|-------------|
| H                                        | -0.00781700 | -1.75509100 | 0.02271900  |
| Fe                                       | -0.00583300 | -0.16601500 | -0.01620500 |
| <b><math>^{3/2}\text{Fe}(0)</math></b>   |             |             |             |
| <b><math>^{3/2}\text{Fe}(0)-1</math></b> |             |             |             |
| C                                        | -1.18882700 | 2.46786100  | 0.00001100  |
| C                                        | -1.20111200 | 3.85871700  | 0.00001900  |
| C                                        | 0.01540900  | 4.55588100  | 0.00001300  |
| C                                        | 1.22939000  | 3.86289700  | 0.00000300  |
| C                                        | 1.21099900  | 2.46745400  | -0.00000400 |
| N                                        | 0.01402600  | 1.81080000  | -0.00000700 |
| H                                        | 0.01287900  | 5.64001300  | 0.00001900  |
| H                                        | -2.13398400 | 4.40960100  | 0.00003000  |
| H                                        | 2.16409000  | 4.41043200  | 0.00000300  |
| C                                        | -2.31038600 | 1.55250400  | 0.00001800  |
| C                                        | 2.32184400  | 1.54714300  | -0.00000500 |
| N                                        | 1.97039500  | 0.26350200  | -0.00000100 |
| N                                        | -1.98869400 | 0.25968600  | 0.00001300  |
| C                                        | 3.75475800  | 2.00129300  | -0.00001300 |
| H                                        | 4.29142600  | 1.62510500  | -0.87565500 |
| H                                        | 3.83308100  | 3.08755700  | 0.00001200  |
| H                                        | 4.29145000  | 1.62506200  | 0.87559500  |
| C                                        | -3.73554900 | 2.02890800  | 0.00001300  |
| H                                        | -3.80255400 | 3.11571700  | 0.00017100  |
| H                                        | -4.27600100 | 1.65690500  | -0.87531200 |
| H                                        | -4.27609500 | 1.65664100  | 0.87516400  |
| C                                        | 2.99674700  | -0.73636200 | -0.00000300 |
| C                                        | 3.47153400  | -1.23534900 | 1.22542900  |
| C                                        | 3.47152800  | -1.23535200 | -1.22543500 |
| C                                        | 4.45474000  | -2.22730200 | 1.20236700  |
| C                                        | 4.45473300  | -2.22730500 | -1.20237700 |
| C                                        | 4.94956400  | -2.71978300 | -0.00000600 |
| H                                        | 4.82900500  | -2.62135300 | 2.14278400  |
| H                                        | 4.82899200  | -2.62135800 | -2.14279500 |
| H                                        | 5.71113700  | -3.49309400 | -0.00000700 |
| C                                        | -3.02464000 | -0.72437600 | 0.00000300  |
| C                                        | -3.50255600 | -1.22398800 | -1.22490200 |
| C                                        | -3.50254400 | -1.22402400 | 1.22489800  |
| C                                        | -4.49731000 | -2.20427300 | -1.20237500 |
| C                                        | -4.49729800 | -2.20430800 | 1.20235200  |
| C                                        | -5.00007000 | -2.68921400 | -0.00001600 |
| H                                        | -4.87368000 | -2.59626300 | -2.14292600 |
| H                                        | -4.87366000 | -2.59632500 | 2.14289600  |
| H                                        | -5.77146200 | -3.45280000 | -0.00002300 |

|    |             |             |             |
|----|-------------|-------------|-------------|
| C  | -2.92955500 | -0.73847500 | -2.53249900 |
| H  | -3.07223600 | 0.33662600  | -2.67943000 |
| H  | -1.85115800 | -0.91942100 | -2.57558300 |
| H  | -3.39354500 | -1.25274100 | -3.37640700 |
| C  | -2.92953400 | -0.73854100 | 2.53250200  |
| H  | -1.85113200 | -0.91945800 | 2.57556200  |
| H  | -3.07224500 | 0.33655000  | 2.67947200  |
| H  | -3.39349700 | -1.25285000 | 3.37640000  |
| C  | 2.92030700  | -0.72950600 | -2.53530700 |
| H  | 1.83862500  | -0.88104300 | -2.59267700 |
| H  | 3.09344300  | 0.34218400  | -2.67476100 |
| H  | 3.37901300  | -1.25102200 | -3.37752500 |
| C  | 2.92032200  | -0.72950000 | 2.53530200  |
| H  | 3.09345700  | 0.34219100  | 2.67475100  |
| H  | 1.83863900  | -0.88103800 | 2.59267900  |
| H  | 3.37903200  | -1.25101300 | 3.37751900  |
| Fe | 0.00987500  | -0.12066000 | -0.00000200 |
| C  | 0.06699600  | -2.12214400 | 0.00001300  |
| H  | 0.61496400  | -2.49440800 | 0.87787800  |
| H  | -0.91675100 | -2.60387600 | 0.00000100  |
| H  | 0.61498900  | -2.49441800 | -0.87783200 |

### $^{3/2}\text{Fe(0)}-2$

|   |             |            |             |
|---|-------------|------------|-------------|
| C | 1.18457800  | 2.37942500 | -0.15159700 |
| C | 1.19938400  | 3.76926900 | -0.21074700 |
| C | 0.00004600  | 4.48307700 | -0.23287500 |
| C | -1.19936400 | 3.76927200 | -0.21058900 |
| C | -1.18454300 | 2.37948200 | -0.15141300 |
| N | -0.00001400 | 1.67527300 | -0.11531200 |
| H | 0.00005300  | 5.56619400 | -0.27064700 |
| H | 2.14340000  | 4.29995600 | -0.23892000 |
| H | -2.14336700 | 4.29998200 | -0.23868200 |
| C | 2.39629600  | 1.57131200 | -0.15115000 |
| C | -2.39635800 | 1.57137000 | -0.15082800 |
| N | -2.23387800 | 0.28754200 | 0.01444600  |
| N | 2.23375800  | 0.28741100 | 0.01411200  |
| C | -3.73675300 | 2.23523500 | -0.36804700 |
| H | -3.95925400 | 2.94782000 | 0.43206500  |
| H | -3.75764800 | 2.79180300 | -1.30911800 |
| H | -4.53907500 | 1.50028500 | -0.39158600 |
| C | 3.73670800  | 2.23509000 | -0.36853300 |
| H | 3.75760400  | 2.79144700 | -1.30973400 |
| H | 3.95929200  | 2.94784500 | 0.43140400  |

|   |             |             |             |
|---|-------------|-------------|-------------|
| H | 4.53901200  | 1.50011500  | -0.39195100 |
| C | -3.33333900 | -0.61503600 | -0.07669200 |
| C | -3.64856100 | -1.17927200 | -1.33042900 |
| C | -4.05448900 | -0.98174600 | 1.07642000  |
| C | -4.66661200 | -2.13188800 | -1.40017900 |
| C | -5.06954700 | -1.93527600 | 0.95800300  |
| C | -5.37299900 | -2.51753500 | -0.26644000 |
| H | -4.90719900 | -2.57368500 | -2.36282200 |
| H | -5.62960500 | -2.21919100 | 1.84456600  |
| H | -6.16044000 | -3.26093000 | -0.33848000 |
| C | 3.33323900  | -0.61515300 | -0.07697500 |
| C | 4.05477900  | -0.98135400 | 1.07606800  |
| C | 3.64815200  | -1.17987900 | -1.33057800 |
| C | 5.06984300  | -1.93489600 | 0.95773800  |
| C | 4.66623100  | -2.13246500 | -1.40024400 |
| C | 5.37296400  | -2.51763400 | -0.26655300 |
| H | 5.63017900  | -2.21841800 | 1.84425300  |
| H | 4.90657000  | -2.57462500 | -2.36278200 |
| H | 6.16041900  | -3.26102200 | -0.33852600 |
| C | 3.76489400  | -0.36262500 | 2.42211700  |
| H | 3.65943400  | 0.72361400  | 2.36583000  |
| H | 2.83939500  | -0.74997500 | 2.85721500  |
| H | 4.56898100  | -0.58143500 | 3.12768900  |
| C | 2.91832400  | -0.75135100 | -2.57869700 |
| H | 1.83716600  | -0.83669700 | -2.45733800 |
| H | 3.13064700  | 0.29277200  | -2.83366800 |
| H | 3.21574800  | -1.36396100 | -3.43199400 |
| C | -3.76407700 | -0.36362800 | 2.42263000  |
| H | -2.83882500 | -0.75182900 | 2.85752100  |
| H | -3.65779900 | 0.72254900  | 2.36669800  |
| H | -4.56826300 | -0.58209400 | 3.12819100  |
| C | -2.91906800 | -0.75023200 | -2.57856700 |
| H | -3.13157300 | 0.29395200  | -2.83314600 |
| H | -1.83787000 | -0.83547600 | -2.45746400 |
| H | -3.21660800 | -1.36258300 | -3.43200800 |
| C | -0.00103200 | -2.25081200 | -0.85604000 |
| H | -0.00051900 | -2.24727600 | -1.95330700 |
| H | 0.88071900  | -2.82838000 | -0.54944500 |
| H | -0.88392100 | -2.82706300 | -0.55024600 |
| C | 0.00107500  | -1.44631800 | 2.38979500  |
| H | 0.92058400  | -2.01085900 | 2.28091700  |
| H | -0.91781500 | -2.01221900 | 2.28266700  |
| C | 0.00036900  | -0.14219200 | 2.69218300  |

|                                  |             |             |             |
|----------------------------------|-------------|-------------|-------------|
| H                                | -0.91982200 | 0.41254600  | 2.82842200  |
| H                                | 0.91994400  | 0.41402600  | 2.82652600  |
| Fe                               | 0.00002100  | -0.37631600 | 0.00609600  |
| <b><sup>3/2</sup>Fe(0)-TS2/3</b> |             |             |             |
| C                                | 1.19138900  | 2.48219600  | 0.02395700  |
| C                                | 1.20800600  | 3.87295100  | 0.05394700  |
| C                                | 0.00767100  | 4.58660900  | 0.05448000  |
| C                                | -1.19469200 | 3.87607900  | 0.03664800  |
| C                                | -1.18134000 | 2.48541800  | 0.00783200  |
| N                                | 0.00414700  | 1.78424600  | -0.00722700 |
| H                                | 0.00897800  | 5.67027900  | 0.07384200  |
| H                                | 2.15243800  | 4.40371000  | 0.07854400  |
| H                                | -2.13785000 | 4.40949700  | 0.04779000  |
| C                                | 2.38593500  | 1.65826900  | 0.04866300  |
| C                                | -2.37874900 | 1.66464700  | 0.02095700  |
| N                                | -2.18426600 | 0.37205600  | -0.03628100 |
| N                                | 2.18835800  | 0.36623800  | -0.01650900 |
| C                                | -3.73895000 | 2.31225000  | 0.12328000  |
| H                                | -3.83464600 | 2.89260100  | 1.04585800  |
| H                                | -3.91328800 | 3.00018000  | -0.70914200 |
| H                                | -4.53184600 | 1.56629500  | 0.11259600  |
| C                                | 3.74678500  | 2.30114100  | 0.16923300  |
| H                                | 3.94126900  | 2.97682900  | -0.66890700 |
| H                                | 3.82677400  | 2.89345200  | 1.08555100  |
| H                                | 4.53604300  | 1.55143900  | 0.18448400  |
| C                                | -3.26616600 | -0.54848800 | 0.04363100  |
| C                                | -3.88178800 | -1.01222300 | -1.13648900 |
| C                                | -3.66459800 | -1.03805200 | 1.30452600  |
| C                                | -4.86232400 | -2.00196300 | -1.03547900 |
| C                                | -4.64813400 | -2.02889500 | 1.35758000  |
| C                                | -5.23978700 | -2.51928300 | 0.19900000  |
| H                                | -5.33697000 | -2.36672100 | -1.94206300 |
| H                                | -4.95266100 | -2.41682600 | 2.32555500  |
| H                                | -5.99682000 | -3.29479400 | 0.25802600  |
| C                                | 3.26742100  | -0.55844700 | 0.05630600  |
| C                                | 3.64174200  | -1.08430200 | 1.31010700  |
| C                                | 3.90521300  | -0.98857100 | -1.12465000 |
| C                                | 4.62015600  | -2.08042000 | 1.35293500  |
| C                                | 4.87879800  | -1.98639900 | -1.03399200 |
| C                                | 5.23025300  | -2.54128800 | 0.19153600  |
| H                                | 4.90629000  | -2.49612100 | 2.31496800  |
| H                                | 5.36883600  | -2.32709200 | -1.94178900 |
| H                                | 5.98214200  | -3.32239000 | 0.24217800  |

|                              |             |             |             |
|------------------------------|-------------|-------------|-------------|
| C                            | 3.04342500  | -0.54781500 | 2.58773000  |
| H                            | 3.46935800  | 0.42911600  | 2.84385600  |
| H                            | 1.96436900  | -0.40816200 | 2.50783400  |
| H                            | 3.24387700  | -1.21854800 | 3.42587300  |
| C                            | 3.59428100  | -0.34767200 | -2.45489400 |
| H                            | 2.52489100  | -0.19588000 | -2.59985600 |
| H                            | 4.06714700  | 0.63779200  | -2.53900100 |
| H                            | 3.96889200  | -0.95716700 | -3.28005800 |
| C                            | -3.08441800 | -0.47200700 | 2.57784600  |
| H                            | -2.00617600 | -0.32212000 | 2.50573000  |
| H                            | -3.52311200 | 0.50462500  | 2.81280500  |
| H                            | -3.28581700 | -1.12965700 | 3.42605900  |
| C                            | -3.53489200 | -0.41650700 | -2.47844100 |
| H                            | -3.94742800 | 0.59348800  | -2.58357600 |
| H                            | -2.45815500 | -0.33159700 | -2.62439500 |
| H                            | -3.94416200 | -1.01997200 | -3.29141100 |
| C                            | -0.08299600 | -2.64357200 | -0.28860100 |
| H                            | 0.78021600  | -3.16233500 | -0.68527700 |
| H                            | -1.03071200 | -3.03014400 | -0.64085500 |
| C                            | -0.01952100 | -2.10413400 | 1.01590600  |
| H                            | -0.92439400 | -2.10816200 | 1.61296400  |
| H                            | 0.91396400  | -2.19253400 | 1.56029700  |
| Fe                           | 0.00451400  | -0.24718300 | -0.10839300 |
| C                            | 0.03233500  | -1.39620600 | -2.05362100 |
| H                            | -0.80319800 | -1.89244100 | -2.54236600 |
| H                            | -0.02608000 | -0.32463000 | -2.31737200 |
| H                            | 0.97248300  | -1.78293100 | -2.44002900 |
| <b><sup>3/2</sup>Fe(0)-3</b> |             |             |             |
| C                            | -1.18494000 | 2.67144900  | -0.10532600 |
| C                            | -1.20427800 | 4.06261200  | -0.08658400 |
| C                            | 0.00015300  | 4.77168500  | -0.10776500 |
| C                            | 1.20454800  | 4.06254900  | -0.08657900 |
| C                            | 1.18513700  | 2.67138800  | -0.10532200 |
| N                            | 0.00008200  | 1.98586600  | -0.20352800 |
| H                            | 0.00018100  | 5.85546800  | -0.09168200 |
| H                            | -2.14605200 | 4.59630200  | -0.03423100 |
| H                            | 2.14635000  | 4.59619000  | -0.03422100 |
| C                            | -2.35770000 | 1.82230100  | 0.02571900  |
| C                            | 2.35785500  | 1.82217800  | 0.02571800  |
| N                            | 2.10968100  | 0.54051500  | 0.14163600  |
| N                            | -2.10959400 | 0.54062400  | 0.14164300  |
| C                            | 3.73745000  | 2.43146200  | 0.05077900  |
| H                            | 3.96696400  | 2.93882900  | -0.89126200 |



|   |             |             |             |
|---|-------------|-------------|-------------|
| H | 3.81989000  | 3.17797300  | 0.84579900  |
| H | 4.50062000  | 1.67480900  | 0.22359900  |
| C | -3.73726300 | 2.43165600  | 0.05077800  |
| H | -3.81966200 | 3.17818100  | 0.84579100  |
| H | -3.96675500 | 2.93902500  | -0.89126800 |
| H | -4.50047200 | 1.67504500  | 0.22360900  |
| C | 3.14747700  | -0.42512500 | 0.25737300  |
| C | 3.35085100  | -1.03398200 | 1.51209400  |
| C | 3.88553100  | -0.83223800 | -0.87186600 |
| C | 4.31933500  | -2.03215800 | 1.62455500  |
| C | 4.83851900  | -1.84235100 | -0.71453000 |
| C | 5.06240900  | -2.43824200 | 0.52085800  |
| H | 4.48635800  | -2.49956300 | 2.59073100  |
| H | 5.40730500  | -2.16733200 | -1.58102400 |
| H | 5.80589600  | -3.22237500 | 0.62181500  |
| C | -3.14744300 | -0.42495800 | 0.25739400  |
| C | -3.88552400 | -0.83204200 | -0.87183800 |
| C | -3.35084700 | -1.03379100 | 1.51212100  |
| C | -4.83856700 | -1.84210100 | -0.71448800 |
| C | -4.31938600 | -2.03191100 | 1.62459700  |
| C | -5.06248600 | -2.43796600 | 0.52090700  |
| H | -5.40737400 | -2.16705900 | -1.58097700 |
| H | -4.48643200 | -2.49929700 | 2.59077800  |
| H | -5.80601700 | -3.22205600 | 0.62187400  |
| C | -3.65813500 | -0.20852200 | -2.22705700 |
| H | -4.11587100 | 0.78377800  | -2.30446300 |
| H | -2.59435300 | -0.08909800 | -2.44162400 |
| H | -4.09385500 | -0.82654800 | -3.01445600 |
| C | -2.53940900 | -0.60996300 | 2.71062800  |
| H | -1.46824500 | -0.76530700 | 2.54500600  |
| H | -2.66593300 | 0.45254600  | 2.93835600  |
| H | -2.82552500 | -1.17932200 | 3.59712900  |
| C | 3.65817200  | -0.20869100 | -2.22707700 |
| H | 2.59439500  | -0.08921700 | -2.44164500 |
| H | 4.11595200  | 0.78359000  | -2.30447100 |
| H | 4.09386500  | -0.82672700 | -3.01448300 |
| C | 2.53944400  | -0.61011900 | 2.71060900  |
| H | 2.66603900  | 0.45237800  | 2.93835200  |
| H | 1.46826800  | -0.76538800 | 2.54498600  |
| H | 2.82552400  | -1.17951000 | 3.59710100  |
| C | 0.00000200  | -1.78721400 | -1.44262600 |
| H | -0.87454200 | -1.80263600 | -2.10944500 |
| H | 0.87493300  | -1.80295700 | -2.10892900 |

|                                       |             |             |             |
|---------------------------------------|-------------|-------------|-------------|
| C                                     | -0.00048100 | -3.06958500 | -0.58906900 |
| H                                     | -0.87643200 | -3.07927400 | 0.07304300  |
| H                                     | 0.87510700  | -3.07960700 | 0.07352200  |
| C                                     | -0.00050000 | -4.36808800 | -1.40956500 |
| H                                     | -0.88282600 | -4.42180400 | -2.05589000 |
| H                                     | 0.88215900  | -4.42213800 | -2.05540700 |
| H                                     | -0.00084400 | -5.25859300 | -0.76993500 |
| Fe                                    | 0.00002600  | -0.04910500 | -0.33734500 |
| <b><math>3/2\text{Fe(0)}-4</math></b> |             |             |             |
| C                                     | 1.12095200  | 2.58900300  | -0.40559200 |
| C                                     | 1.10623700  | 3.95541000  | -0.67357300 |
| C                                     | -0.10353800 | 4.61866000  | -0.87363100 |
| C                                     | -1.28657600 | 3.87623100  | -0.81431900 |
| C                                     | -1.24280900 | 2.51522000  | -0.53724700 |
| N                                     | -0.04927500 | 1.86202900  | -0.31996300 |
| H                                     | -0.12618100 | 5.68255300  | -1.07884000 |
| H                                     | 2.03820200  | 4.50434600  | -0.73205100 |
| H                                     | -2.23855000 | 4.36484000  | -0.98218300 |
| C                                     | 2.34774800  | 1.82654800  | -0.24478100 |
| C                                     | -2.43987300 | 1.68374000  | -0.47263500 |
| N                                     | -2.26620800 | 0.45089500  | -0.09197100 |
| N                                     | 2.21007500  | 0.56448100  | 0.06628500  |
| C                                     | -3.77461300 | 2.26656500  | -0.87738900 |
| H                                     | -4.07232100 | 3.07932100  | -0.20809100 |
| H                                     | -3.73507200 | 2.68066900  | -1.88842800 |
| H                                     | -4.55608900 | 1.50939800  | -0.85207800 |
| C                                     | 3.68134800  | 2.50135500  | -0.47055000 |
| H                                     | 3.76343200  | 2.89898900  | -1.48629500 |
| H                                     | 3.81536800  | 3.34312700  | 0.21521700  |
| H                                     | 4.50490000  | 1.80783900  | -0.31230400 |
| C                                     | -3.34829100 | -0.47361500 | -0.04649300 |
| C                                     | -3.53426500 | -1.35284000 | -1.13292500 |
| C                                     | -4.17702300 | -0.55213300 | 1.08998200  |
| C                                     | -4.53447200 | -2.32256200 | -1.04811300 |
| C                                     | -5.16264700 | -1.54227000 | 1.13400700  |
| C                                     | -5.34140200 | -2.42906800 | 0.07948900  |
| H                                     | -4.67774500 | -3.00406800 | -1.88164400 |
| H                                     | -5.79937100 | -1.61103600 | 2.01151800  |
| H                                     | -6.10750200 | -3.19586700 | 0.13353900  |
| C                                     | 3.33277700  | -0.31224400 | 0.08097200  |
| C                                     | 3.97306200  | -0.62381500 | 1.29516100  |
| C                                     | 3.75322100  | -0.90702000 | -1.12625200 |
| C                                     | 5.02481100  | -1.54256800 | 1.28463800  |

|                                  |             |             |             |
|----------------------------------|-------------|-------------|-------------|
| C                                | 4.80633600  | -1.82375500 | -1.09034700 |
| C                                | 5.44107800  | -2.14628800 | 0.10364500  |
| H                                | 5.52211100  | -1.78427000 | 2.21970000  |
| H                                | 5.12873700  | -2.29067000 | -2.01660100 |
| H                                | 6.25548500  | -2.86353100 | 0.11366400  |
| C                                | 3.55157400  | 0.03576400  | 2.58339800  |
| H                                | 3.64459100  | 1.12539700  | 2.53449100  |
| H                                | 2.50752200  | -0.18084600 | 2.81771800  |
| H                                | 4.16240200  | -0.31168700 | 3.41886700  |
| C                                | 3.09163900  | -0.55799300 | -2.43644700 |
| H                                | 2.00332300  | -0.61940100 | -2.36749800 |
| H                                | 3.33227700  | 0.46167400  | -2.75661700 |
| H                                | 3.41908500  | -1.23415200 | -3.22841300 |
| C                                | -4.04834800 | 0.42965600  | 2.22882700  |
| H                                | -3.01151300 | 0.57924000  | 2.53053100  |
| H                                | -4.44226600 | 1.41600500  | 1.95879800  |
| H                                | -4.60701700 | 0.08799500  | 3.10246500  |
| C                                | -2.69052300 | -1.22909900 | -2.37579700 |
| H                                | -2.87837100 | -0.28574900 | -2.90026000 |
| H                                | -1.62552700 | -1.25210000 | -2.13761700 |
| H                                | -2.90157200 | -2.04183300 | -3.07333700 |
| C                                | 0.01883600  | -2.21576100 | 0.16885000  |
| H                                | 0.59041500  | -2.52070500 | 1.06146400  |
| H                                | -1.01632700 | -2.53025300 | 0.37679000  |
| C                                | 0.55233200  | -3.02681300 | -1.02313500 |
| H                                | 1.60797000  | -2.78679000 | -1.19147100 |
| H                                | 0.03310600  | -2.74102000 | -1.94768900 |
| C                                | 0.42304500  | -4.54782200 | -0.85278100 |
| H                                | 0.97077500  | -4.88966500 | 0.03180600  |
| H                                | -0.62384100 | -4.84113300 | -0.72073900 |
| H                                | 0.81617800  | -5.09447900 | -1.71845600 |
| C                                | -0.35828600 | -0.41677800 | 2.98013900  |
| H                                | 0.46844900  | -1.08097000 | 3.20618400  |
| H                                | -1.32585400 | -0.89197900 | 2.86428100  |
| C                                | -0.19458900 | 0.90372500  | 2.88128400  |
| H                                | -1.02232100 | 1.57270100  | 2.67515100  |
| H                                | 0.77349300  | 1.37253000  | 3.01793900  |
| Fe                               | 0.00850100  | -0.14049400 | 0.19845000  |
| <b><sup>3/2</sup>Fe(0)-TS4/5</b> |             |             |             |
| C                                | 1.20013800  | 2.58096200  | -0.21928000 |
| C                                | 1.21921200  | 3.95985400  | -0.42556300 |
| C                                | 0.02490900  | 4.66577900  | -0.55008900 |
| C                                | -1.18085900 | 3.95764500  | -0.49044700 |

|   |             |             |             |
|---|-------------|-------------|-------------|
| C | -1.17037500 | 2.58495000  | -0.27818000 |
| N | 0.00799300  | 1.89686100  | -0.10742200 |
| H | 0.02908600  | 5.73750800  | -0.71128200 |
| H | 2.16498800  | 4.48320300  | -0.50127600 |
| H | -2.12026400 | 4.48193100  | -0.61740100 |
| C | 2.39100600  | 1.76291300  | -0.14852000 |
| C | -2.37661400 | 1.77023900  | -0.24652500 |
| N | -2.21431000 | 0.49825600  | 0.00267000  |
| N | 2.20785200  | 0.47848200  | 0.06330300  |
| C | -3.71746300 | 2.41506500  | -0.51410900 |
| H | -3.93707100 | 3.18653600  | 0.22989100  |
| H | -3.73879400 | 2.89896400  | -1.49448700 |
| H | -4.52137100 | 1.68241000  | -0.48269100 |
| C | 3.74877500  | 2.40201200  | -0.33129100 |
| H | 3.83296600  | 2.89638500  | -1.30338600 |
| H | 3.92981400  | 3.16376400  | 0.43308300  |
| H | 4.54605900  | 1.66483100  | -0.26033600 |
| C | -3.31887000 | -0.39995200 | -0.06274800 |
| C | -3.62216300 | -1.01212300 | -1.29687200 |
| C | -4.05492100 | -0.71955100 | 1.09501200  |
| C | -4.64449800 | -1.96199800 | -1.34402600 |
| C | -5.07312100 | -1.67215100 | 1.00025500  |
| C | -5.36652900 | -2.29919500 | -0.20473800 |
| H | -4.87682300 | -2.43859200 | -2.29211200 |
| H | -5.64399800 | -1.92029600 | 1.89055100  |
| H | -6.15741400 | -3.04051600 | -0.25725700 |
| C | 3.30652200  | -0.42664000 | -0.03088300 |
| C | 3.99162600  | -0.86227700 | 1.12054500  |
| C | 3.67104800  | -0.91840100 | -1.30477100 |
| C | 4.99974200  | -1.82149400 | 0.98131000  |
| C | 4.67933800  | -1.87931500 | -1.39542500 |
| C | 5.33866800  | -2.34074300 | -0.26131700 |
| H | 5.53038800  | -2.15595200 | 1.86848100  |
| H | 4.95214900  | -2.26504900 | -2.37363900 |
| H | 6.12041800  | -3.08860200 | -0.34806000 |
| C | 3.68837200  | -0.30396600 | 2.48961700  |
| H | 4.56011900  | -0.39440800 | 3.14173500  |
| H | 3.40461900  | 0.74878300  | 2.45159800  |
| H | 2.86702100  | -0.83795900 | 2.97549500  |
| C | 3.00844400  | -0.40118200 | -2.55803000 |
| H | 1.92157100  | -0.37797500 | -2.46590300 |
| H | 3.32453700  | 0.62209100  | -2.78848000 |
| H | 3.26648100  | -1.02189000 | -3.41848100 |

|                              |             |             |             |
|------------------------------|-------------|-------------|-------------|
| C                            | -3.76852600 | -0.05273700 | 2.41734300  |
| H                            | -2.81938400 | -0.38992300 | 2.84063600  |
| H                            | -3.70248200 | 1.03448200  | 2.32707900  |
| H                            | -4.55226700 | -0.28046100 | 3.14265000  |
| C                            | -2.87146000 | -0.63891400 | -2.55104900 |
| H                            | -3.07429400 | 0.39364300  | -2.85438300 |
| H                            | -1.79075100 | -0.71550300 | -2.41453500 |
| H                            | -3.15637500 | -1.28622200 | -3.38269500 |
| C                            | -0.38424800 | -2.32484000 | 0.45819900  |
| H                            | -0.15555300 | -3.24969900 | 0.99002600  |
| H                            | -1.46964800 | -2.27670400 | 0.34496700  |
| C                            | 0.33041800  | -2.37402900 | -0.89684200 |
| H                            | 1.41227600  | -2.42662500 | -0.74888400 |
| H                            | 0.14994200  | -1.46313800 | -1.48426700 |
| C                            | -0.11476400 | -3.57847400 | -1.74635200 |
| H                            | 0.09422900  | -4.51769800 | -1.22532300 |
| H                            | -1.18902500 | -3.54580300 | -1.94847800 |
| H                            | 0.41018000  | -3.60580200 | -2.70782300 |
| C                            | 0.00840600  | -1.48060500 | 2.42636100  |
| H                            | 0.91911500  | -2.06129800 | 2.52075400  |
| H                            | -0.88125500 | -2.03994100 | 2.69370300  |
| C                            | 0.05643900  | -0.09359800 | 2.71721800  |
| H                            | -0.82963800 | 0.39998800  | 3.10149700  |
| H                            | 0.99740500  | 0.36178700  | 2.99955800  |
| Fe                           | 0.00693800  | 0.01173600  | 0.58949200  |
| <b><sup>3/2</sup>Fe(0)-5</b> |             |             |             |
| C                            | 1.18589700  | -3.07220600 | -0.14402400 |
| C                            | 1.20569700  | -4.46301100 | -0.11812700 |
| C                            | 0.00098400  | -5.17251400 | -0.13326900 |
| C                            | -1.20398800 | -4.46346400 | -0.11806900 |
| C                            | -1.18470800 | -3.07265000 | -0.14395900 |
| N                            | 0.00046700  | -2.38976200 | -0.24249700 |
| H                            | 0.00118600  | -6.25609700 | -0.11066800 |
| H                            | 2.14757100  | -4.99664400 | -0.06642000 |
| H                            | -2.14566800 | -4.99744200 | -0.06633500 |
| C                            | 2.35792300  | -2.22123900 | -0.02049400 |
| C                            | -2.35703000 | -2.22212100 | -0.02033500 |
| N                            | -2.11101200 | -0.94012300 | 0.10584400  |
| N                            | 2.11144800  | -0.93933000 | 0.10570500  |
| C                            | -3.73822400 | -2.82744000 | -0.01530400 |
| H                            | -3.95548900 | -3.33139900 | -0.96201400 |
| H                            | -3.83342000 | -3.57562900 | 0.77657500  |
| H                            | -4.50116900 | -2.06879200 | 0.14889400  |

|   |             |             |             |
|---|-------------|-------------|-------------|
| C | 3.73935100  | -2.82601300 | -0.01565500 |
| H | 3.83480000  | -3.57461600 | 0.77579400  |
| H | 3.95689300  | -3.32933500 | -0.96264600 |
| H | 4.50196800  | -2.06713600 | 0.14901000  |
| C | -3.15079300 | 0.02409500  | 0.23121400  |
| C | -3.38373200 | 0.58926700  | 1.50041100  |
| C | -3.86176500 | 0.46702800  | -0.90144300 |
| C | -4.35646000 | 1.58269600  | 1.62217800  |
| C | -4.82192300 | 1.46827800  | -0.73347500 |
| C | -5.07519300 | 2.02277700  | 0.51564800  |
| H | -4.54573100 | 2.01916600  | 2.59861700  |
| H | -5.37170900 | 1.82021000  | -1.60163900 |
| H | -5.82295800 | 2.80172500  | 0.62513200  |
| C | 3.15089500  | 0.02524900  | 0.23112400  |
| C | 3.86160400  | 0.46859000  | -0.90153100 |
| C | 3.38375900  | 0.59030900  | 1.50038800  |
| C | 4.82142900  | 1.47015300  | -0.73351200 |
| C | 4.35616000  | 1.58405000  | 1.62220600  |
| C | 5.07462800  | 2.02455000  | 0.51566800  |
| H | 5.37100500  | 1.82240400  | -1.60168000 |
| H | 4.54536700  | 2.02045300  | 2.59868900  |
| H | 5.82213300  | 2.80374100  | 0.62520000  |
| C | 3.59557500  | -0.10744900 | -2.27053100 |
| H | 3.99503600  | -1.12199900 | -2.37621800 |
| H | 2.52548700  | -0.16214700 | -2.48283300 |
| H | 4.06151400  | 0.50540600  | -3.04445000 |
| C | 2.59863000  | 0.12756300  | 2.70182700  |
| H | 1.52229100  | 0.24458700  | 2.54325700  |
| H | 2.76652800  | -0.93207800 | 2.91817600  |
| H | 2.87400900  | 0.69755200  | 3.59132100  |
| C | -3.59564600 | -0.10908000 | -2.27039600 |
| H | -2.52555800 | -0.16331100 | -2.48282000 |
| H | -3.99464700 | -1.12382800 | -2.37590900 |
| H | -4.06196200 | 0.50345800  | -3.04433800 |
| C | -2.59827800 | 0.12702900  | 2.70183500  |
| H | -2.76500900 | -0.93285400 | 2.91785000  |
| H | -1.52204100 | 0.24532000  | 2.54345900  |
| H | -2.87440600 | 0.69647000  | 3.59144900  |
| C | -0.00046900 | 1.52313800  | -1.21356500 |
| H | 0.87296800  | 1.61662400  | -1.87546800 |
| H | -0.87410500 | 1.61612400  | -1.87527600 |
| C | -0.00070500 | 2.69942100  | -0.21919300 |
| H | 0.87501500  | 2.63444200  | 0.44119200  |

|                              |             |             |             |
|------------------------------|-------------|-------------|-------------|
| H                            | -0.87626500 | 2.63392600  | 0.44135400  |
| C                            | -0.00116100 | 4.08615700  | -0.88366600 |
| H                            | 0.87504300  | 4.16568000  | -1.54135300 |
| H                            | -0.87760300 | 4.16523100  | -1.54108300 |
| C                            | -0.00128900 | 5.25612500  | 0.10620200  |
| H                            | -0.87685700 | 5.17446800  | 0.76302600  |
| H                            | 0.87447000  | 5.17480500  | 0.76281800  |
| C                            | -0.00163000 | 6.62898000  | -0.57146600 |
| H                            | -0.00174100 | 7.44265500  | 0.16049500  |
| H                            | 0.88013300  | 6.75864300  | -1.20749200 |
| H                            | -0.88354600 | 6.75828300  | -1.20735400 |
| Fe                           | 0.00011300  | -0.34819800 | -0.35591600 |
| <b><sup>3/2</sup>Fe(0)-6</b> |             |             |             |
| C                            | 1.05655900  | 2.62949200  | 0.29517900  |
| C                            | 1.02509900  | 4.01107400  | 0.46458300  |
| C                            | -0.19499800 | 4.68028600  | 0.55102500  |
| C                            | -1.37006000 | 3.92891500  | 0.48051500  |
| C                            | -1.30979000 | 2.55009200  | 0.31092600  |
| N                            | -0.10434000 | 1.88862400  | 0.21001300  |
| H                            | -0.23091500 | 5.75636700  | 0.67462400  |
| H                            | 1.95155000  | 4.56846700  | 0.52896100  |
| H                            | -2.33051300 | 4.42359200  | 0.55754300  |
| C                            | 2.29666000  | 1.87235800  | 0.22602800  |
| C                            | -2.50012000 | 1.71036100  | 0.25679500  |
| N                            | -2.30912500 | 0.45007000  | -0.01383100 |
| N                            | 2.18734700  | 0.59773300  | -0.03716800 |
| C                            | -3.85429200 | 2.32063700  | 0.54016800  |
| H                            | -3.87913100 | 2.79645900  | 1.52438200  |
| H                            | -4.10173200 | 3.09144600  | -0.19595000 |
| H                            | -4.63861800 | 1.56693400  | 0.50870900  |
| C                            | 3.61133500  | 2.57286900  | 0.48533700  |
| H                            | 3.78587500  | 3.36749600  | -0.24625300 |
| H                            | 3.62745900  | 3.03831600  | 1.47490300  |
| H                            | 4.44578000  | 1.87701800  | 0.42598400  |
| C                            | -3.38871400 | -0.47979000 | 0.01939000  |
| C                            | -4.10763800 | -0.78013700 | -1.15418000 |
| C                            | -3.68716800 | -1.13559700 | 1.23201600  |
| C                            | -5.10124900 | -1.76144200 | -1.09983800 |
| C                            | -4.68456800 | -2.11265000 | 1.23793000  |
| C                            | -5.38665500 | -2.43431500 | 0.08195800  |
| H                            | -5.65922400 | -1.99482700 | -2.00225400 |
| H                            | -4.91183400 | -2.62511600 | 2.16823100  |
| H                            | -6.15692500 | -3.19851700 | 0.10406200  |

|    |             |             |             |
|----|-------------|-------------|-------------|
| C  | 3.33059900  | -0.25358200 | -0.00410800 |
| C  | 3.69999900  | -0.85552600 | 1.21672600  |
| C  | 4.04523000  | -0.53142800 | -1.18557500 |
| C  | 4.76586700  | -1.75742000 | 1.22425800  |
| C  | 5.10740600  | -1.43764000 | -1.13030500 |
| C  | 5.46532400  | -2.05735100 | 0.06087500  |
| H  | 5.04789300  | -2.22968600 | 2.16084700  |
| H  | 5.66189100  | -1.65381800 | -2.03913200 |
| H  | 6.28900800  | -2.76359200 | 0.08412200  |
| C  | 2.97331300  | -0.52547900 | 2.49657700  |
| H  | 3.14985300  | 0.50980200  | 2.80831400  |
| H  | 1.89388300  | -0.64409900 | 2.38669000  |
| H  | 3.30663100  | -1.17283200 | 3.30998300  |
| C  | 3.70125700  | 0.14288700  | -2.49106000 |
| H  | 2.74787200  | -0.20852800 | -2.89381400 |
| H  | 3.61977300  | 1.22820300  | -2.38587300 |
| H  | 4.46596400  | -0.05981100 | -3.24345400 |
| C  | -2.96421700 | -0.77833700 | 2.50652900  |
| H  | -1.88116900 | -0.82725800 | 2.38177900  |
| H  | -3.20264400 | 0.23880500  | 2.83639700  |
| H  | -3.24380200 | -1.45788300 | 3.31387000  |
| C  | -3.84235800 | -0.05377100 | -2.45044700 |
| H  | -3.82790000 | 1.03173100  | -2.32039200 |
| H  | -2.88003700 | -0.33332900 | -2.88676800 |
| H  | -4.61271600 | -0.28774800 | -3.18789100 |
| C  | -0.06111800 | -2.08313400 | 0.66049900  |
| H  | 0.13922300  | -2.02588700 | 1.74288900  |
| H  | -1.10491800 | -2.42324700 | 0.58554800  |
| C  | 0.84984600  | -3.16459900 | 0.05688600  |
| H  | 1.89713100  | -2.84264700 | 0.08454900  |
| H  | 0.61253100  | -3.30158100 | -1.00675500 |
| C  | 0.74209300  | -4.53128500 | 0.74976600  |
| H  | 1.01945800  | -4.45688900 | 1.80677400  |
| H  | -0.28344300 | -4.91362800 | 0.70969300  |
| H  | 1.39656600  | -5.27972300 | 0.28727100  |
| C  | -0.05768600 | -0.88913300 | -2.60037000 |
| H  | 0.87385600  | -1.44394100 | -2.59575400 |
| H  | -0.96292800 | -1.48461500 | -2.55268700 |
| C  | -0.08801500 | 0.44342200  | -2.72354000 |
| H  | -1.02008700 | 0.99381800  | -2.76317200 |
| H  | 0.81937400  | 1.02971700  | -2.80301300 |
| Fe | -0.02584000 | -0.14933200 | -0.09012700 |



**$3/2\text{Fe(0)}$ -TS6/7**

|   |             |             |             |
|---|-------------|-------------|-------------|
| C | 1.04611100  | 2.71242300  | 0.15053500  |
| C | 1.02706900  | 4.09998600  | 0.25716700  |
| C | -0.18675500 | 4.78508600  | 0.31112200  |
| C | -1.36756000 | 4.04337200  | 0.25222600  |
| C | -1.31887200 | 2.65795100  | 0.14634000  |
| N | -0.11940200 | 1.97671800  | 0.09973100  |
| H | -0.21219400 | 5.86538300  | 0.39384500  |
| H | 1.95825300  | 4.65132100  | 0.29774500  |
| H | -2.32474900 | 4.54914200  | 0.28846600  |
| C | 2.28460200  | 1.95168200  | 0.08487900  |
| C | -2.51538500 | 1.83271700  | 0.07708600  |
| N | -2.31653400 | 0.55002600  | -0.02528900 |
| N | 2.16963200  | 0.65703200  | -0.01856100 |
| C | -3.88140600 | 2.47654000  | 0.12585600  |
| H | -4.02456600 | 3.03386500  | 1.05618100  |
| H | -4.01675100 | 3.18349400  | -0.69774200 |
| H | -4.66834900 | 1.72738800  | 0.05818000  |
| C | 3.60912400  | 2.68009500  | 0.13762400  |
| H | 4.44311100  | 1.98418800  | 0.07036000  |
| H | 3.70089900  | 3.39620900  | -0.68393200 |
| H | 3.71494600  | 3.24359500  | 1.06910600  |
| C | -3.39337000 | -0.37387600 | -0.09568800 |
| C | -3.87915000 | -0.77819900 | -1.35540000 |
| C | -3.91250900 | -0.92978200 | 1.09073300  |
| C | -4.85882400 | -1.77240900 | -1.40659300 |
| C | -4.89158600 | -1.92124100 | 0.99168100  |
| C | -5.35941700 | -2.35082100 | -0.24526400 |
| H | -5.23305600 | -2.09317200 | -2.37475600 |
| H | -5.29106600 | -2.35907700 | 1.90219400  |
| H | -6.11432000 | -3.12848200 | -0.30380400 |
| C | 3.32025400  | -0.17635300 | -0.08774100 |
| C | 3.88105200  | -0.69376600 | 1.09733500  |
| C | 3.85615500  | -0.52045000 | -1.34547400 |
| C | 4.94964900  | -1.58864600 | 0.99908800  |
| C | 4.92580100  | -1.41730900 | -1.39672500 |
| C | 5.46740200  | -1.96006200 | -0.23654300 |
| H | 5.38124000  | -1.99470200 | 1.90968100  |
| H | 5.33880100  | -1.68881300 | -2.36413100 |
| H | 6.29398100  | -2.66097600 | -0.29486200 |
| C | 3.37624000  | -0.25721500 | 2.45038700  |
| H | 3.70612300  | 0.76012000  | 2.69009000  |
| H | 2.28670300  | -0.25089300 | 2.49776100  |

|                              |             |             |             |
|------------------------------|-------------|-------------|-------------|
| H                            | 3.75051900  | -0.91340300 | 3.23880300  |
| C                            | 3.31885800  | 0.09792100  | -2.61224000 |
| H                            | 3.73884100  | -0.38985300 | -3.49410600 |
| H                            | 2.23139100  | 0.03079900  | -2.67061300 |
| H                            | 3.56939900  | 1.16254400  | -2.67657700 |
| C                            | -3.46069600 | -0.43524600 | 2.44304400  |
| H                            | -3.91502800 | 0.53278300  | 2.68441600  |
| H                            | -3.74908100 | -1.13370400 | 3.23135300  |
| H                            | -2.37983000 | -0.29605600 | 2.48819500  |
| C                            | -3.39104300 | -0.11917100 | -2.62198800 |
| H                            | -3.82326200 | 0.88105800  | -2.74195900 |
| H                            | -2.30725900 | 0.00432400  | -2.62756600 |
| H                            | -3.67353400 | -0.70250700 | -3.50077300 |
| C                            | -0.07611700 | -1.71552300 | 1.43866300  |
| H                            | 0.28885700  | -1.04464600 | 2.22258000  |
| H                            | -1.12323800 | -1.97709900 | 1.58874000  |
| C                            | 0.78363200  | -2.83550300 | 1.15271200  |
| H                            | 1.82239400  | -2.72585900 | 1.46848200  |
| H                            | 0.98702000  | -2.80600100 | -0.16800300 |
| C                            | 0.25456700  | -4.25141400 | 1.29713900  |
| H                            | 0.14886900  | -4.51276600 | 2.35606400  |
| H                            | -0.73438200 | -4.34911800 | 0.83927500  |
| H                            | 0.91812500  | -4.99034200 | 0.83697800  |
| C                            | 0.79929400  | -2.67800000 | -1.48629200 |
| H                            | 1.83523400  | -2.58468800 | -1.80769000 |
| H                            | 0.40393200  | -3.68402000 | -1.63592500 |
| C                            | -0.07511100 | -1.56362300 | -1.68751100 |
| H                            | -1.12084900 | -1.80834100 | -1.85454300 |
| H                            | 0.28995500  | -0.79213900 | -2.37044700 |
| Fe                           | -0.08557700 | -0.09234500 | -0.03343100 |
| <b><sup>3/2</sup>Fe(0)-7</b> |             |             |             |
| C                            | -1.10914400 | 2.76080000  | 0.09209300  |
| C                            | -1.09542100 | 4.15354100  | 0.02593800  |
| C                            | 0.12429400  | 4.83098700  | 0.00490300  |
| C                            | 1.31558100  | 4.09303200  | -0.00136400 |
| C                            | 1.26141200  | 2.70614300  | 0.06977800  |
| N                            | 0.06375600  | 2.05783300  | 0.19211200  |
| H                            | 0.15021200  | 5.91329100  | -0.04932500 |
| H                            | -2.02452900 | 4.70911700  | -0.03221000 |
| H                            | 2.26779400  | 4.60419100  | -0.08339100 |
| C                            | -2.29278500 | 1.92962700  | -0.01803800 |
| C                            | 2.41257700  | 1.81840100  | -0.05467100 |
| N                            | 2.15030400  | 0.53679700  | -0.05161900 |

|   |             |             |             |
|---|-------------|-------------|-------------|
| N | -2.08231000 | 0.63138500  | -0.01878100 |
| C | 3.79473300  | 2.40395000  | -0.21698100 |
| H | 3.86840700  | 2.99851300  | -1.13254700 |
| H | 4.03930200  | 3.06724800  | 0.61756200  |
| H | 4.55224300  | 1.62390900  | -0.26385800 |
| C | -3.65337900 | 2.56771400  | -0.16101600 |
| H | -3.85608800 | 3.25195100  | 0.66799500  |
| H | -3.72572200 | 3.15100600  | -1.08429900 |
| H | -4.44230000 | 1.81778600  | -0.17945000 |
| C | 3.16837700  | -0.41935200 | -0.33697900 |
| C | 3.92807100  | -1.00362300 | 0.69537400  |
| C | 3.35025500  | -0.81611400 | -1.67814800 |
| C | 4.84991400  | -2.00018000 | 0.36331800  |
| C | 4.28213800  | -1.81646900 | -1.96323600 |
| C | 5.02744100  | -2.41291400 | -0.95234500 |
| H | 5.43783900  | -2.45505000 | 1.15534900  |
| H | 4.42187300  | -2.12801800 | -2.99448600 |
| H | 5.74524600  | -3.19184200 | -1.18887200 |
| C | -3.13463600 | -0.28104800 | -0.31622000 |
| C | -3.36232600 | -0.62535100 | -1.66510900 |
| C | -3.88486700 | -0.88242100 | 0.71440100  |
| C | -4.32292100 | -1.59589500 | -1.95959100 |
| C | -4.83853700 | -1.84492600 | 0.37333100  |
| C | -5.05648100 | -2.20997900 | -0.95103100 |
| H | -4.49495900 | -1.86939100 | -2.99680600 |
| H | -5.41947800 | -2.31117800 | 1.16397200  |
| H | -5.79731700 | -2.96461100 | -1.19530600 |
| C | -2.60753400 | 0.05735700  | -2.77987200 |
| H | -2.99955200 | 1.06231500  | -2.97349200 |
| H | -1.54894300 | 0.18174200  | -2.54283200 |
| H | -2.68893600 | -0.50753700 | -3.71068800 |
| C | -3.68498000 | -0.48447100 | 2.15443600  |
| H | -3.87973700 | 0.58131800  | 2.31096100  |
| H | -4.35725300 | -1.04304200 | 2.80877200  |
| H | -2.66108400 | -0.66366800 | 2.48483100  |
| C | 2.56578300  | -0.16491400 | -2.79038300 |
| H | 1.49518900  | -0.14550600 | -2.57389600 |
| H | 2.86862700  | 0.87612100  | -2.94605800 |
| H | 2.71464700  | -0.69355200 | -3.73395000 |
| C | 3.76938600  | -0.56068900 | 2.12747400  |
| H | 3.97508300  | 0.50744900  | 2.24955700  |
| H | 2.75359200  | -0.72490300 | 2.48922700  |
| H | 4.45457800  | -1.10545400 | 2.77992100  |

|                                          |             |             |             |
|------------------------------------------|-------------|-------------|-------------|
| C                                        | 0.03947800  | -2.37790600 | -0.93536000 |
| H                                        | -0.38381900 | -1.54898300 | -1.49440500 |
| H                                        | 1.11540900  | -2.51049300 | -0.99111700 |
| C                                        | -0.74757400 | -3.23737300 | -0.28594300 |
| H                                        | -1.82166100 | -3.06093300 | -0.28272900 |
| H                                        | -0.86692300 | -2.34839800 | 2.86989000  |
| C                                        | -0.27358200 | -4.46181000 | 0.43555000  |
| H                                        | -0.70927400 | -5.36381300 | -0.00957300 |
| H                                        | 0.81407200  | -4.55735400 | 0.40377000  |
| H                                        | -0.58546300 | -4.44917400 | 1.48440300  |
| C                                        | 0.03949000  | -1.82800100 | 3.19761600  |
| H                                        | 0.08899600  | -1.94231200 | 4.29032800  |
| H                                        | 0.88340800  | -2.39047100 | 2.78366500  |
| C                                        | 0.04734500  | -0.36094500 | 2.74720200  |
| H                                        | 0.93173300  | 0.14709300  | 3.15678200  |
| H                                        | -0.80223100 | 0.16878700  | 3.20092600  |
| Fe                                       | 0.00354300  | 0.11956600  | 0.73379400  |
| <b><math>^{3/2}\text{Fe(0)}-8</math></b> |             |             |             |
| C                                        | 1.19777200  | 2.55559300  | -0.00029000 |
| C                                        | 1.21179600  | 3.94130200  | -0.13607300 |
| C                                        | -0.00002600 | 4.63847100  | -0.18918400 |
| C                                        | -1.21182900 | 3.94128600  | -0.13606400 |
| C                                        | -1.19778800 | 2.55556900  | -0.00028300 |
| N                                        | 0.00000100  | 1.89489400  | 0.10903200  |
| H                                        | -0.00003600 | 5.71645600  | -0.30313100 |
| H                                        | 2.14667700  | 4.48218900  | -0.22187000 |
| H                                        | -2.14671300 | 4.48217000  | -0.22183700 |
| C                                        | 2.31514900  | 1.64731300  | 0.00054800  |
| C                                        | -2.31511600 | 1.64724600  | 0.00055500  |
| N                                        | -1.97910700 | 0.35874400  | 0.02487000  |
| N                                        | 1.97918700  | 0.35880800  | 0.02484800  |
| C                                        | -3.74358700 | 2.11439900  | -0.02751900 |
| H                                        | -3.81441100 | 3.20051800  | -0.06055200 |
| H                                        | -4.27749400 | 1.71405400  | -0.89377400 |
| H                                        | -4.28888400 | 1.76965300  | 0.85591300  |
| C                                        | 3.74356000  | 2.11467800  | -0.02764600 |
| H                                        | 4.27730500  | 1.71487900  | -0.89425600 |
| H                                        | 3.81416700  | 3.20083200  | -0.06015900 |
| H                                        | 4.28916700  | 1.76963000  | 0.85546700  |
| C                                        | -3.01381100 | -0.62898400 | 0.00813200  |
| C                                        | -3.46464700 | -1.12474900 | -1.22897600 |
| C                                        | -3.53006400 | -1.12027100 | 1.22132100  |
| C                                        | -4.45422900 | -2.11086300 | -1.23077200 |

|                                  |             |             |             |
|----------------------------------|-------------|-------------|-------------|
| C                                | -4.51810300 | -2.10648000 | 1.17305100  |
| C                                | -4.98219000 | -2.59985400 | -0.04131800 |
| H                                | -4.80752900 | -2.50238500 | -2.18036500 |
| H                                | -4.92242900 | -2.49426900 | 2.10360800  |
| H                                | -5.74745900 | -3.36929800 | -0.06013800 |
| C                                | 3.01382200  | -0.62898500 | 0.00812700  |
| C                                | 3.53001100  | -1.12026700 | 1.22134900  |
| C                                | 3.46464500  | -1.12483500 | -1.22895000 |
| C                                | 4.51795000  | -2.10657600 | 1.17314400  |
| C                                | 4.45412000  | -2.11105900 | -1.23067900 |
| C                                | 4.98200400  | -2.60005800 | -0.04119600 |
| H                                | 4.92222600  | -2.49435800 | 2.10372500  |
| H                                | 4.80740100  | -2.50265200 | -2.18025000 |
| H                                | 5.74718900  | -3.36958600 | -0.05996900 |
| C                                | 3.02435500  | -0.60646200 | 2.54652800  |
| H                                | 3.18715700  | 0.46915300  | 2.66595700  |
| H                                | 1.94845800  | -0.77388200 | 2.65258800  |
| H                                | 3.52535400  | -1.11047900 | 3.37528400  |
| C                                | 2.89463700  | -0.60660100 | -2.52629200 |
| H                                | 1.80222300  | -0.62901100 | -2.51988300 |
| H                                | 3.18290300  | 0.43241200  | -2.71870900 |
| H                                | 3.24310400  | -1.20484200 | -3.37040400 |
| C                                | -3.02435500 | -0.60661000 | 2.54653600  |
| H                                | -1.94849000 | -0.77421300 | 2.65261300  |
| H                                | -3.18697500 | 0.46902700  | 2.66601300  |
| H                                | -3.52545700 | -1.11057900 | 3.37525800  |
| C                                | -2.89446400 | -0.60658200 | -2.52626700 |
| H                                | -3.18206300 | 0.43265900  | -2.71844200 |
| H                                | -1.80206000 | -0.62968300 | -2.51995900 |
| H                                | -3.24337200 | -1.20443600 | -3.37047200 |
| C                                | 0.00004900  | -2.03071100 | 0.51255300  |
| H                                | 0.87766000  | -2.31320100 | 1.11171800  |
| H                                | -0.87755500 | -2.31324000 | 1.11171000  |
| C                                | 0.00007300  | -2.85757700 | -0.78201200 |
| H                                | 0.88278100  | -2.65505800 | -1.39766400 |
| H                                | -0.88269200 | -2.65517400 | -1.39762000 |
| H                                | 0.00014700  | -3.93949700 | -0.58821800 |
| Fe                               | 0.00002800  | -0.03249600 | 0.25948600  |
| <b><sup>3/2</sup>Fe(0)-TS3/9</b> |             |             |             |
| C                                | -1.12235600 | 2.56572800  | 0.07201000  |
| C                                | -1.12254500 | 3.95415500  | 0.11202400  |
| C                                | 0.08964000  | 4.65275900  | 0.15015200  |
| C                                | 1.28057000  | 3.92797100  | 0.14744300  |

|   |             |             |             |
|---|-------------|-------------|-------------|
| C | 1.25098500  | 2.53601800  | 0.10433300  |
| N | 0.05431900  | 1.85347500  | 0.06545500  |
| H | 0.10146100  | 5.73595200  | 0.18203800  |
| H | -2.05954000 | 4.49833100  | 0.11488800  |
| H | 2.23067000  | 4.44880300  | 0.17792000  |
| C | -2.32796700 | 1.75570000  | 0.03503400  |
| C | 2.42479000  | 1.69359100  | 0.08835500  |
| N | 2.19413200  | 0.40135300  | 0.03967200  |
| N | -2.14969100 | 0.46042300  | 0.01611400  |
| C | 3.80426000  | 2.30461100  | 0.12878800  |
| H | 3.93736100  | 2.92006100  | 1.02328800  |
| H | 4.57529500  | 1.53612800  | 0.13381600  |
| H | 3.97931000  | 2.95147000  | -0.73611900 |
| C | -3.68410800 | 2.41856400  | 0.02167900  |
| H | -3.79887100 | 3.06690000  | -0.85167300 |
| H | -4.48391600 | 1.68066300  | 0.00129100  |
| H | -3.82452300 | 3.04368300  | 0.90803500  |
| C | 3.25739700  | -0.54228500 | -0.01758300 |
| C | 3.71558400  | -1.14365300 | 1.17215600  |
| C | 3.78607100  | -0.91768600 | -1.26871300 |
| C | 4.69928100  | -2.13137500 | 1.08422600  |
| C | 4.76564000  | -1.91317800 | -1.30897900 |
| C | 5.22074500  | -2.52181600 | -0.14487000 |
| H | 5.05804400  | -2.59969100 | 1.99636600  |
| H | 5.17409600  | -2.21184400 | -2.27027100 |
| H | 5.97893700  | -3.29688700 | -0.19459700 |
| C | -3.24682300 | -0.44488200 | -0.04289900 |
| C | -3.74451000 | -0.84844200 | -1.29746400 |
| C | -3.76517300 | -0.98152700 | 1.15223200  |
| C | -4.76177700 | -1.80547100 | -1.33415400 |
| C | -4.78499000 | -1.93210700 | 1.06702000  |
| C | -5.28095400 | -2.34842500 | -0.16413900 |
| H | -5.14886800 | -2.12601500 | -2.29719300 |
| H | -5.19086400 | -2.35210200 | 1.98287300  |
| H | -6.06868800 | -3.09359800 | -0.21112700 |
| C | -3.20862000 | -0.24669300 | -2.57289900 |
| H | -3.55797500 | 0.78279000  | -2.71101400 |
| H | -2.11711000 | -0.21093200 | -2.57313800 |
| H | -3.53581200 | -0.82014100 | -3.44257200 |
| C | -3.23855100 | -0.53316900 | 2.49250400  |
| H | -2.14989800 | -0.61581300 | 2.54168500  |
| H | -3.48344800 | 0.51537300  | 2.69364400  |
| H | -3.66735300 | -1.13121600 | 3.29910600  |

|                              |             |             |             |
|------------------------------|-------------|-------------|-------------|
| C                            | 3.32827500  | -0.24300600 | -2.53879000 |
| H                            | 2.24224100  | -0.13582300 | -2.57433600 |
| H                            | 3.74512800  | 0.76636200  | -2.63041300 |
| H                            | 3.64796300  | -0.80710000 | -3.41735100 |
| C                            | 3.17103800  | -0.71720600 | 2.51289600  |
| H                            | 3.46136200  | 0.31040300  | 2.75750700  |
| H                            | 2.07894900  | -0.74597600 | 2.53009700  |
| H                            | 3.54696100  | -1.36300500 | 3.30918900  |
| C                            | 0.00960700  | -1.92970000 | -1.17075900 |
| H                            | -0.95087200 | -2.11072700 | -1.64333400 |
| H                            | 0.85293000  | -1.81727700 | -1.84286200 |
| C                            | 0.23273600  | -2.41809000 | 0.13922800  |
| H                            | 0.02248400  | -1.25454800 | 1.33805900  |
| H                            | 1.26904500  | -2.59637700 | 0.41262000  |
| C                            | -0.74648400 | -3.37519100 | 0.79019200  |
| H                            | -1.78111800 | -3.07416600 | 0.61808300  |
| H                            | -0.61395000 | -4.36962500 | 0.34781400  |
| H                            | -0.58871400 | -3.45609400 | 1.86807500  |
| Fe                           | 0.01605400  | -0.15253500 | 0.07141500  |
| <b><sup>3/2</sup>Fe(0)-9</b> |             |             |             |
| C                            | 1.14035000  | 2.58346600  | 0.05731700  |
| C                            | 1.15358500  | 4.00993400  | 0.11342500  |
| C                            | -0.06363100 | 4.68111900  | 0.09344700  |
| C                            | -1.27115100 | 3.98943400  | 0.05467900  |
| C                            | -1.22990400 | 2.56528200  | 0.00107100  |
| N                            | -0.03769400 | 1.93003800  | -0.06618600 |
| H                            | -0.07332500 | 5.76661600  | 0.12808100  |
| H                            | 2.08927300  | 4.55009200  | 0.17114700  |
| H                            | -2.21733000 | 4.51387200  | 0.07185200  |
| C                            | 2.25484700  | 1.69591800  | 0.16266300  |
| C                            | -2.33502900 | 1.65788900  | 0.06157000  |
| N                            | -2.01438600 | 0.35901800  | 0.13649400  |
| N                            | 1.95845000  | 0.38681000  | 0.19149400  |
| C                            | -3.73889100 | 2.19133800  | 0.09418300  |
| H                            | -3.85477700 | 2.91388600  | 0.90912000  |
| H                            | -3.98308800 | 2.72282000  | -0.83252400 |
| H                            | -4.47399500 | 1.40142600  | 0.23761900  |
| C                            | 3.64166000  | 2.25817500  | 0.30006800  |
| H                            | 3.68183300  | 2.97308500  | 1.12889600  |
| H                            | 4.38188000  | 1.48259200  | 0.48797300  |
| H                            | 3.94222300  | 2.80633700  | -0.59996900 |
| C                            | -3.03577700 | -0.63195600 | 0.17942600  |
| C                            | -3.72724900 | -1.01676900 | -0.98860500 |

|    |             |             |             |
|----|-------------|-------------|-------------|
| C  | -3.30829100 | -1.25854600 | 1.41451200  |
| C  | -4.66876000 | -2.04710200 | -0.89959800 |
| C  | -4.25951000 | -2.27943500 | 1.45762800  |
| C  | -4.93436300 | -2.67958100 | 0.30876900  |
| H  | -5.19881200 | -2.35416700 | -1.79689100 |
| H  | -4.47416900 | -2.76283400 | 2.40637800  |
| H  | -5.66615400 | -3.47977000 | 0.35650000  |
| C  | 3.00635700  | -0.57523000 | 0.23795700  |
| C  | 3.22815500  | -1.26990400 | 1.44635300  |
| C  | 3.78060300  | -0.86273500 | -0.90620300 |
| C  | 4.21281300  | -2.25895700 | 1.48615500  |
| C  | 4.75404000  | -1.86322600 | -0.82197600 |
| C  | 4.97126200  | -2.56168200 | 0.35980000  |
| H  | 4.38759200  | -2.79420200 | 2.41509300  |
| H  | 5.34718100  | -2.09514100 | -1.70221500 |
| H  | 5.72957500  | -3.33699500 | 0.40425200  |
| C  | 2.43801300  | -0.92670400 | 2.68453500  |
| H  | 2.59796200  | 0.11218800  | 2.98797700  |
| H  | 1.36189600  | -1.03624100 | 2.52440500  |
| H  | 2.72413600  | -1.56809600 | 3.52073300  |
| C  | 3.58789600  | -0.10964100 | -2.20047800 |
| H  | 2.53983300  | 0.13323900  | -2.38017200 |
| H  | 4.14044300  | 0.83643800  | -2.19804900 |
| H  | 3.95731300  | -0.69280000 | -3.04695600 |
| C  | -2.61886600 | -0.80237800 | 2.67702400  |
| H  | -1.53036200 | -0.80622600 | 2.57731100  |
| H  | -2.89630900 | 0.22436800  | 2.93570700  |
| H  | -2.88633200 | -1.44181300 | 3.52076200  |
| C  | -3.49208500 | -0.32731000 | -2.31154800 |
| H  | -4.10305300 | 0.57810600  | -2.40068100 |
| H  | -2.45274700 | -0.02141600 | -2.43884200 |
| H  | -3.76603100 | -0.97986900 | -3.14366900 |
| C  | 0.01283800  | -2.09758100 | 0.09549900  |
| H  | 0.99681600  | -2.38312800 | 0.45081900  |
| H  | -0.80441700 | -2.17732500 | 0.80328500  |
| C  | -0.23820100 | -2.00551100 | -1.24574800 |
| H  | -0.02124000 | 0.33155400  | -1.84796100 |
| H  | -1.27254000 | -1.93245000 | -1.56552000 |
| C  | 0.74129200  | -2.37929800 | -2.32242000 |
| H  | 1.77144600  | -2.35349200 | -1.96691600 |
| H  | 0.53136800  | -3.40597100 | -2.64933900 |
| H  | 0.65340100  | -1.73280200 | -3.19674500 |
| Fe | -0.01985000 | 0.04627000  | -0.29388900 |



**$3/2\text{Fe}(0)$ -10**

|   |             |             |             |
|---|-------------|-------------|-------------|
| C | -1.18586700 | 2.34958400  | -0.02325400 |
| C | -1.20672900 | 3.72261500  | -0.24610300 |
| C | -0.00008900 | 4.42497900  | -0.33302500 |
| C | 1.20660800  | 3.72261500  | -0.24682200 |
| C | 1.18588500  | 2.34960200  | -0.02390600 |
| N | 0.00006000  | 1.69367700  | 0.16701000  |
| H | -0.00013900 | 5.49414800  | -0.51078100 |
| H | -2.14858800 | 4.24361900  | -0.37388200 |
| H | 2.14839200  | 4.24361400  | -0.37518400 |
| C | -2.34818400 | 1.47547600  | -0.03284800 |
| C | 2.34821500  | 1.47551200  | -0.03383700 |
| N | 2.08234000  | 0.19115100  | 0.00686900  |
| N | -2.08231100 | 0.19109900  | 0.00741900  |
| C | 3.73783800  | 2.05424600  | -0.11047900 |
| H | 3.87801800  | 2.61582900  | -1.03920000 |
| H | 3.92373500  | 2.74662000  | 0.71559700  |
| H | 4.49367600  | 1.27187700  | -0.07683500 |
| C | -3.73784800 | 2.05423800  | -0.10872300 |
| H | -3.87863000 | 2.61562900  | -1.03746900 |
| H | -4.49369600 | 1.27191000  | -0.07442300 |
| H | -3.92316400 | 2.74678100  | 0.71734000  |
| C | 3.11255400  | -0.79439400 | -0.03714600 |
| C | 3.72729500  | -1.23060700 | 1.15169200  |
| C | 3.43612700  | -1.37105800 | -1.27969600 |
| C | 4.68771700  | -2.24165400 | 1.06753500  |
| C | 4.40325200  | -2.37745200 | -1.31638200 |
| C | 5.02943500  | -2.81237900 | -0.15347000 |
| H | 5.16770700  | -2.58745600 | 1.97836700  |
| H | 4.66099200  | -2.82727200 | -2.27089200 |
| H | 5.77540000  | -3.59952600 | -0.19739500 |
| C | -3.11257000 | -0.79438000 | -0.03690400 |
| C | -3.43672400 | -1.37005700 | -1.27976800 |
| C | -3.72679400 | -1.23149900 | 1.15186000  |
| C | -4.40388300 | -2.37640200 | -1.31680100 |
| C | -4.68728300 | -2.24245900 | 1.06734800  |
| C | -5.02955900 | -2.81222200 | -0.15394700 |
| H | -4.66205200 | -2.82549100 | -2.27154000 |
| H | -5.16688900 | -2.58893500 | 1.97812600  |
| H | -5.77556800 | -3.59931200 | -0.19816200 |
| C | -2.75039200 | -0.91221800 | -2.54256500 |
| H | -2.97626100 | 0.13289200  | -2.77824500 |
| H | -1.66232600 | -0.98162900 | -2.45243700 |

|    |             |             |             |
|----|-------------|-------------|-------------|
| H  | -3.06005700 | -1.51784800 | -3.39646700 |
| C  | -3.35056900 | -0.63692800 | 2.48558900  |
| H  | -2.27830700 | -0.74150400 | 2.67278700  |
| H  | -3.58483700 | 0.43127100  | 2.54243600  |
| H  | -3.88633000 | -1.13439500 | 3.29633600  |
| C  | 2.74922200  | -0.91419500 | -2.54253400 |
| H  | 1.66121500  | -0.98421700 | -2.45210200 |
| H  | 2.97441100  | 0.13093700  | -2.77874200 |
| H  | 3.05901400  | -1.52004700 | -3.39623200 |
| C  | 3.35160000  | -0.63509000 | 2.48515100  |
| H  | 3.58596800  | 0.43312600  | 2.54120200  |
| H  | 2.27939900  | -0.73947700 | 2.67280200  |
| H  | 3.88761300  | -1.13205100 | 3.29604100  |
| H  | 0.00059600  | -1.57186100 | 1.62716200  |
| Fe | 0.00017400  | -0.30053700 | 0.57026600  |

(<sup>Ar</sup>PDI)Co<sup>+</sup> (Singlet)1

<sup>0</sup>Co(+)B

|   |             |             |             |
|---|-------------|-------------|-------------|
| C | 1.18510600  | 2.45417000  | 0.00014600  |
| C | 1.21200400  | 3.84735300  | 0.00025100  |
| C | -0.00002600 | 4.54114600  | 0.00030900  |
| C | -1.21206000 | 3.84735700  | 0.00026100  |
| C | -1.18516600 | 2.45417500  | 0.00017600  |
| N | -0.00003100 | 1.80712400  | 0.00013600  |
| H | -0.00002500 | 5.62460700  | 0.00042200  |
| H | 2.15353400  | 4.38255300  | 0.00026800  |
| H | -2.15358800 | 4.38256100  | 0.00027400  |
| C | 2.30554400  | 1.49208500  | 0.00005900  |
| C | -2.30560500 | 1.49208900  | 0.00016300  |
| N | -1.91081300 | 0.25097500  | 0.00017300  |
| N | 1.91075300  | 0.25097000  | 0.00005500  |
| C | -3.72355800 | 1.96354000  | 0.00009900  |
| H | -3.92056400 | 2.58591400  | 0.87873000  |
| H | -3.92105900 | 2.58409300  | -0.87972400 |
| H | -4.42533200 | 1.13221200  | 0.00112500  |
| C | 3.72349600  | 1.96353500  | 0.00004700  |
| H | 3.92076400  | 2.58492800  | -0.87922700 |
| H | 3.92073600  | 2.58506800  | 0.87922800  |
| H | 4.42527100  | 1.13220600  | 0.00012700  |
| C | -2.83247600 | -0.85592100 | 0.00003100  |
| C | -3.23231600 | -1.40252900 | -1.23207500 |

|    |             |             |             |
|----|-------------|-------------|-------------|
| C  | -3.23167900 | -1.40331200 | 1.23196700  |
| C  | -4.06872100 | -2.52062000 | -1.20497500 |
| C  | -4.06812300 | -2.52139600 | 1.20459800  |
| C  | -4.48576000 | -3.07608300 | -0.00025100 |
| H  | -4.39336700 | -2.95923500 | -2.14297200 |
| H  | -4.39228400 | -2.96058400 | 2.14249400  |
| H  | -5.13320200 | -3.94609200 | -0.00038100 |
| C  | 2.83244300  | -0.85590900 | -0.00009600 |
| C  | 3.23195100  | -1.40309600 | 1.23183800  |
| C  | 3.23205900  | -1.40266800 | -1.23220300 |
| C  | 4.06849900  | -2.52109400 | 1.20444600  |
| C  | 4.06859200  | -2.52067300 | -1.20512500 |
| C  | 4.48595200  | -3.07590700 | -0.00041600 |
| H  | 4.39288900  | -2.96013300 | 2.14233300  |
| H  | 4.39306200  | -2.95939400 | -2.14313300 |
| H  | 5.13347900  | -3.94585300 | -0.00054600 |
| C  | 2.79122900  | -0.80027000 | 2.54344800  |
| H  | 3.27456700  | 0.16436900  | 2.73185700  |
| H  | 1.71187600  | -0.62384500 | 2.57373300  |
| H  | 3.04585600  | -1.45602300 | 3.37655100  |
| C  | 2.79134700  | -0.79946700 | -2.54364600 |
| H  | 1.71189200  | -0.62369700 | -2.57412600 |
| H  | 3.27414500  | 0.16554800  | -2.73149200 |
| H  | 3.04658900  | -1.45468600 | -3.37697900 |
| C  | -2.79075800 | -0.80059400 | 2.54355800  |
| H  | -1.71133900 | -0.62453600 | 2.57383500  |
| H  | -3.27374900 | 0.16422300  | 2.73193200  |
| H  | -3.04560100 | -1.45623400 | 3.37668200  |
| C  | -2.79179800 | -0.79915800 | -2.54350200 |
| H  | -3.27370100 | 0.16643000  | -2.73066100 |
| H  | -1.71217100 | -0.62448000 | -2.57451400 |
| H  | -3.04816000 | -1.45375700 | -3.37697700 |
| Co | -0.00003500 | 0.01666000  | 0.00014600  |

**<sup>0</sup>Co(+)<sup>B</sup>-1B**

| Atom | x           | y          | z          |
|------|-------------|------------|------------|
| C    | -1.17381700 | 2.51243100 | 0.01705200 |
| C    | -1.20890000 | 3.90623500 | 0.02644000 |
| C    | 0.00001700  | 4.60245400 | 0.02992900 |
| C    | 1.20892200  | 3.90620700 | 0.02545900 |
| C    | 1.17379900  | 2.51240800 | 0.01620700 |
| N    | -0.00001800 | 1.85912200 | 0.01074300 |
| H    | 0.00003000  | 5.68613100 | 0.03688900 |
| H    | -2.15142400 | 4.43904500 | 0.03121200 |

|   |             |             |             |
|---|-------------|-------------|-------------|
| H | 2.15145900  | 4.43900000  | 0.02941000  |
| C | -2.31690400 | 1.57367800  | 0.01409600  |
| C | 2.31687100  | 1.57363600  | 0.01331400  |
| N | 1.97261200  | 0.32134900  | 0.00263700  |
| N | -1.97261700 | 0.32139900  | 0.00285700  |
| C | 3.71469900  | 2.10776700  | 0.02543900  |
| H | 3.88890100  | 2.74007600  | -0.85091700 |
| H | 3.87455200  | 2.73635400  | 0.90714100  |
| H | 4.45521600  | 1.31196300  | 0.02979400  |
| C | -3.71472800 | 2.10781900  | 0.02653300  |
| H | -3.87460500 | 2.73576900  | 0.90869300  |
| H | -3.88888300 | 2.74076800  | -0.84936500 |
| H | -4.45526900 | 1.31203300  | 0.03028700  |
| C | 2.99321900  | -0.69842500 | 0.00176400  |
| C | 3.42848500  | -1.21888300 | 1.23280100  |
| C | 3.48828800  | -1.16709600 | -1.22710900 |
| C | 4.37304400  | -2.24798400 | 1.20804700  |
| C | 4.43081000  | -2.19863400 | -1.19848300 |
| C | 4.86873700  | -2.73881100 | 0.00519700  |
| H | 4.72177400  | -2.66610000 | 2.14687500  |
| H | 4.82420700  | -2.57873600 | -2.13584600 |
| H | 5.59773600  | -3.54167700 | 0.00610200  |
| C | -2.99320100 | -0.69840700 | 0.00146300  |
| C | -3.48756600 | -1.16707400 | -1.22768100 |
| C | -3.42911200 | -1.21888700 | 1.23225400  |
| C | -4.43011100 | -2.19861000 | -1.19958200 |
| C | -4.37369100 | -2.24795500 | 1.20698600  |
| C | -4.86872900 | -2.73876900 | 0.00385400  |
| H | -4.82300600 | -2.57868700 | -2.13716600 |
| H | -4.72296500 | -2.66604900 | 2.14562000  |
| H | -5.59774600 | -3.54161900 | 0.00435800  |
| C | -3.05721900 | -0.55936300 | -2.54139800 |
| H | -3.56493800 | 0.39364300  | -2.72796600 |
| H | -1.98391600 | -0.35849000 | -2.57722200 |
| H | -3.30468800 | -1.21923600 | -3.37391900 |
| C | -2.93151400 | -0.66409900 | 2.54523600  |
| H | -1.84934800 | -0.50994100 | 2.54809800  |
| H | -3.38975500 | 0.30517400  | 2.77102400  |
| H | -3.17915300 | -1.33415600 | 3.36940300  |
| C | 3.05861400  | -0.55946900 | -2.54108500 |
| H | 1.98535200  | -0.35847700 | -2.57743100 |
| H | 3.56653100  | 0.39344900  | -2.72755200 |
| H | 3.30638100  | -1.21947400 | -3.37341300 |

|    |             |             |             |
|----|-------------|-------------|-------------|
| C  | 2.93044500  | -0.66395100 | 2.54556400  |
| H  | 3.38931900  | 0.30494100  | 2.77172000  |
| H  | 1.84841400  | -0.50896100 | 2.54785400  |
| H  | 3.17713000  | -1.33429400 | 3.36978800  |
| Co | -0.00002700 | -0.01639000 | -0.00207200 |
| C  | -0.00093600 | -2.07488000 | 0.56966100  |
| H  | -0.92255200 | -2.24061300 | 1.11557100  |
| H  | 0.91980800  | -2.23983900 | 1.11731900  |
| C  | 0.00049100  | -1.99476700 | -0.79480400 |
| H  | 0.92107700  | -2.09570600 | -1.35749400 |
| H  | -0.91883200 | -2.09627600 | -1.35949700 |

**<sup>0</sup>Co(+)<sup>B</sup>-2B**

| Atom | x           | y           | z           |
|------|-------------|-------------|-------------|
| C    | -1.19448200 | 0.74604700  | 2.22531600  |
| C    | -1.20697000 | 1.57230900  | 3.34557400  |
| C    | 0.00034300  | 1.97799500  | 3.91861400  |
| C    | 1.20741200  | 1.57134800  | 3.34573800  |
| C    | 1.19440600  | 0.74511700  | 2.22547700  |
| N    | -0.00017800 | 0.31163600  | 1.70092000  |
| H    | 0.00054200  | 2.62118300  | 4.79084500  |
| H    | -2.14870800 | 1.90046700  | 3.77002100  |
| H    | 2.14937300  | 1.89875000  | 3.77028200  |
| C    | -2.31092000 | 0.22696500  | 1.48811300  |
| C    | 2.31053300  | 0.22519000  | 1.48842500  |
| N    | 1.95884800  | -0.47100100 | 0.41534000  |
| N    | -1.95963900 | -0.46952300 | 0.41509200  |
| C    | 3.72763100  | 0.43246000  | 1.94844500  |
| H    | 3.87532600  | 1.45372800  | 2.30610200  |
| H    | 3.98063600  | -0.23978300 | 2.77581300  |
| H    | 4.44255400  | 0.24953200  | 1.14792100  |
| C    | -3.72793500 | 0.43518900  | 1.94794700  |
| H    | -3.98209300 | -0.23815800 | 2.77406900  |
| H    | -3.87454600 | 1.45601700  | 2.30725100  |
| H    | -4.44278500 | 0.25443400  | 1.14685600  |
| C    | 2.97321400  | -1.20128600 | -0.29115300 |
| C    | 3.32538500  | -2.48152200 | 0.18421800  |
| C    | 3.59075100  | -0.65866700 | -1.43458100 |
| C    | 4.27436000  | -3.22126900 | -0.52607000 |
| C    | 4.53956200  | -1.43340300 | -2.10798200 |
| C    | 4.87619000  | -2.70821000 | -1.66833700 |
| H    | 4.54236900  | -4.21249200 | -0.17197200 |
| H    | 5.02343800  | -1.02170100 | -2.98866900 |
| H    | 5.61045400  | -3.29592700 | -2.20990300 |

|    |             |             |             |
|----|-------------|-------------|-------------|
| C  | -2.97453900 | -1.19896800 | -0.29150100 |
| C  | -3.59160400 | -0.65576000 | -1.43491400 |
| C  | -3.32779700 | -2.47894400 | 0.18375600  |
| C  | -4.54103600 | -1.42965500 | -2.10840500 |
| C  | -4.27738200 | -3.21783800 | -0.52660100 |
| C  | -4.87875400 | -2.70420300 | -1.66885200 |
| H  | -5.02452500 | -1.01748100 | -2.98908300 |
| H  | -4.54622600 | -4.20886100 | -0.17257800 |
| H  | -5.61348300 | -3.29127800 | -2.21048300 |
| C  | -3.28580700 | 0.74097300  | -1.91415100 |
| H  | -3.39834400 | 1.47907800  | -1.11569300 |
| H  | -2.26200500 | 0.83560600  | -2.27867300 |
| H  | -3.95800000 | 1.02499900  | -2.72584900 |
| C  | -2.72072800 | -3.04653900 | 1.44437800  |
| H  | -1.65813800 | -2.81175600 | 1.52596300  |
| H  | -3.20448500 | -2.64020700 | 2.33955800  |
| H  | -2.84128200 | -4.13123100 | 1.47842400  |
| C  | 3.28605700  | 0.73824300  | -1.91404100 |
| H  | 2.26296400  | 0.83307700  | -2.28056600 |
| H  | 3.39717400  | 1.47616300  | -1.11524200 |
| H  | 3.95980000  | 1.02231300  | -2.72444000 |
| C  | 2.71783300  | -3.04848300 | 1.44488900  |
| H  | 3.20191700  | -2.64244200 | 2.34002600  |
| H  | 1.65543700  | -2.81281400 | 1.52644400  |
| H  | 2.83749500  | -4.13327000 | 1.47905500  |
| Co | -0.00033400 | -0.44591200 | 0.03977500  |
| C  | -0.00101900 | -2.34434600 | -0.96221500 |
| H  | -0.91824500 | -2.85830200 | -0.70801800 |
| H  | 0.91575400  | -2.85898200 | -0.70775200 |
| C  | -0.00048800 | -1.32245000 | -1.88709600 |
| H  | 0.91590600  | -1.02610300 | -2.38235000 |
| H  | -0.91655800 | -1.02530300 | -2.38247700 |
| Al | 0.00302600  | 4.14627400  | -1.36807400 |
| C  | -1.69350800 | 4.61714000  | -0.45284800 |
| H  | -2.57615600 | 4.13853500  | -0.89194500 |
| H  | -1.68612700 | 4.36997000  | 0.61490600  |
| H  | -1.87330100 | 5.69967500  | -0.51240000 |
| C  | 1.69887700  | 4.61480200  | -0.45037900 |
| H  | 1.69028100  | 4.36552700  | 0.61688400  |
| H  | 2.58189200  | 4.13686700  | -0.88945800 |
| H  | 1.87896500  | 5.69741900  | -0.50752600 |
| C  | 0.00049100  | 1.40182100  | -0.82343000 |
| H  | 0.90259000  | 1.88649800  | -0.44516700 |

|   |             |            |             |
|---|-------------|------------|-------------|
| H | -0.90128100 | 1.88735000 | -0.44549600 |
| H | 0.00067500  | 1.37066300 | -1.91226400 |
| C | 0.00402900  | 3.96005700 | -3.34105900 |
| H | 0.00405100  | 4.94981300 | -3.81893200 |
| H | 0.88612600  | 3.43714000 | -3.72743200 |
| H | -0.87761700 | 3.43688400 | -3.72812300 |

**<sup>0</sup>Co(+)<sup>B</sup>-TS2B/3B**

| Atom | x           | y           | z           |
|------|-------------|-------------|-------------|
| C    | 3.61831600  | 1.23949300  | -0.33137400 |
| C    | 5.00210100  | 1.28744500  | -0.47608900 |
| C    | 5.72227000  | 0.09366000  | -0.55478500 |
| C    | 5.04608300  | -1.12532500 | -0.47346600 |
| C    | 3.66138600  | -1.12720800 | -0.32904700 |
| N    | 2.96329600  | 0.04390000  | -0.27937800 |
| H    | 6.79981700  | 0.11321400  | -0.66793900 |
| H    | 5.51408700  | 2.24138900  | -0.52408500 |
| H    | 5.59204600  | -2.06033400 | -0.51911800 |
| C    | 2.68909800  | 2.34794300  | -0.19928700 |
| C    | 2.77310500  | -2.26851000 | -0.19593000 |
| N    | 1.51818800  | -1.93812100 | -0.00272300 |
| N    | 1.44715000  | 1.97260900  | -0.00452700 |
| C    | 3.30501700  | -3.66955600 | -0.27861800 |
| H    | 3.81431200  | -3.83276200 | -1.23338900 |
| H    | 4.04096100  | -3.85192400 | 0.51094000  |
| H    | 2.51329700  | -4.40920300 | -0.18222200 |
| C    | 3.16970400  | 3.76724200  | -0.28474800 |
| H    | 3.91033300  | 3.97337300  | 0.49439300  |
| H    | 3.65872200  | 3.95103600  | -1.24643400 |
| H    | 2.35375800  | 4.47809300  | -0.17471600 |
| C    | 0.52435900  | -2.96680800 | 0.13412900  |
| C    | 0.23978500  | -3.48158300 | 1.41114800  |
| C    | -0.17496100 | -3.39524700 | -1.00780200 |
| C    | -0.78290100 | -4.42628400 | 1.52709600  |
| C    | -1.19056700 | -4.34041700 | -0.84282900 |
| C    | -1.49927400 | -4.84995600 | 0.41331100  |
| H    | -1.02312400 | -4.82544400 | 2.50781100  |
| H    | -1.74987500 | -4.67140000 | -1.71233800 |
| H    | -2.30101100 | -5.57220800 | 0.52433300  |
| C    | 0.41750600  | 2.96506100  | 0.13588600  |
| C    | -0.30075200 | 3.36916500  | -1.00314400 |
| C    | 0.11833400  | 3.46732400  | 1.41465100  |
| C    | -1.35026700 | 4.27569300  | -0.83335700 |
| C    | -0.93795200 | 4.37362400  | 1.53529600  |

|    |             |             |             |
|----|-------------|-------------|-------------|
| C  | -1.67349400 | 4.77167600  | 0.42451200  |
| H  | -1.92506200 | 4.58640800  | -1.70023600 |
| H  | -1.18941900 | 4.76236800  | 2.51736900  |
| H  | -2.50167200 | 5.46281000  | 0.53917500  |
| C  | 0.06332200  | 2.86544100  | -2.37894600 |
| H  | 0.96738000  | 3.35500200  | -2.75865200 |
| H  | 0.26364600  | 1.79149200  | -2.38321400 |
| H  | -0.73847600 | 3.06641300  | -3.09132900 |
| C  | 0.92704500  | 3.06341600  | 2.62300600  |
| H  | 1.09814700  | 1.98520300  | 2.65695300  |
| H  | 1.91357000  | 3.54065700  | 2.62427700  |
| H  | 0.42302900  | 3.35914000  | 3.54465200  |
| C  | 0.17384700  | -2.87556700 | -2.38162700 |
| H  | 0.32732300  | -1.79393100 | -2.38453800 |
| H  | 1.10022900  | -3.32486000 | -2.75725600 |
| H  | -0.61501900 | -3.11075200 | -3.09798500 |
| C  | 1.02970800  | -3.05014600 | 2.62234500  |
| H  | 2.03116600  | -3.49518700 | 2.62812600  |
| H  | 1.16555600  | -1.96694600 | 2.65526400  |
| H  | 0.53182300  | -3.36096900 | 3.54235300  |
| Co | 1.17199000  | 0.01143400  | 0.07977300  |
| C  | -0.63410100 | -0.01987900 | 1.07537800  |
| H  | -0.74120800 | 0.88888300  | 1.66038300  |
| H  | -0.71197600 | -0.93047100 | 1.66230500  |
| C  | -1.21518100 | -0.03073800 | -0.20304100 |
| H  | -1.26794600 | -0.94731300 | -0.77270500 |
| H  | -1.29487200 | 0.88132900  | -0.77674600 |
| Al | -5.81010200 | -0.05583200 | -0.23110500 |
| C  | -6.24878100 | -1.70730100 | -1.28914900 |
| H  | -5.86709200 | -1.67322100 | -2.31850100 |
| H  | -5.85091700 | -2.62515600 | -0.83600600 |
| H  | -7.33467500 | -1.85561100 | -1.37273700 |
| C  | -6.31392600 | -0.13288700 | 1.71082900  |
| H  | -5.95950900 | -1.04425500 | 2.21039500  |
| H  | -5.92542900 | 0.71466100  | 2.29090000  |
| H  | -7.40508800 | -0.11764200 | 1.84309200  |
| C  | -3.57715700 | -0.05883000 | -0.20734300 |
| H  | -3.42463300 | -0.99249500 | 0.31668900  |
| H  | -3.45423500 | -0.04850400 | -1.28328300 |
| H  | -3.43537600 | 0.86663800  | 0.33371700  |
| C  | -6.23456900 | 1.67903000  | -1.15325800 |
| H  | -7.31868400 | 1.83067200  | -1.25169500 |
| H  | -5.85270200 | 2.55508300  | -0.61203900 |



|                                         |             |             |             |
|-----------------------------------------|-------------|-------------|-------------|
| H                                       | -5.82665500 | 1.73528000  | -2.17157700 |
| <b><sup>0</sup>Co(+)<sup>B</sup>-3B</b> |             |             |             |
| Atom                                    | x           | y           | z           |
| C                                       | -1.19022100 | 2.69903200  | 0.09065500  |
| C                                       | -1.20735300 | 4.08769000  | 0.00535300  |
| C                                       | 0.00000000  | 4.79119800  | -0.02662900 |
| C                                       | 1.20735400  | 4.08769000  | 0.00535100  |
| C                                       | 1.19022200  | 2.69903200  | 0.09065400  |
| N                                       | 0.00000000  | 2.01600700  | 0.16461300  |
| H                                       | 0.00000000  | 5.87291900  | -0.09399800 |
| H                                       | -2.15153800 | 4.61892900  | -0.04276000 |
| H                                       | 2.15153900  | 4.61892800  | -0.04276300 |
| C                                       | -2.30446000 | 1.78299600  | 0.08871100  |
| C                                       | 2.30446000  | 1.78299600  | 0.08871000  |
| N                                       | 1.94226600  | 0.51438700  | 0.05862700  |
| N                                       | -1.94226700 | 0.51438800  | 0.05862800  |
| C                                       | 3.72183800  | 2.28156300  | 0.12352900  |
| H                                       | 3.96964000  | 2.82413600  | -0.79484800 |
| H                                       | 3.86562700  | 2.97785800  | 0.95474200  |
| H                                       | 4.43392700  | 1.46611300  | 0.23464300  |
| C                                       | -3.72183800 | 2.28156400  | 0.12353100  |
| H                                       | -3.86562600 | 2.97785800  | 0.95474500  |
| H                                       | -3.96963900 | 2.82413900  | -0.79484500 |
| H                                       | -4.43392700 | 1.46611500  | 0.23464300  |
| C                                       | 2.93470200  | -0.51700000 | 0.06980300  |
| C                                       | 3.20928900  | -1.17556200 | 1.28220100  |
| C                                       | 3.57632800  | -0.88764200 | -1.12540900 |
| C                                       | 4.14833000  | -2.20879500 | 1.27967500  |
| C                                       | 4.50493000  | -1.93131000 | -1.08214900 |
| C                                       | 4.79362400  | -2.58913000 | 0.10766500  |
| H                                       | 4.36988500  | -2.72251000 | 2.21060900  |
| H                                       | 5.00217300  | -2.23128900 | -2.00003600 |
| H                                       | 5.51507200  | -3.39987800 | 0.12111200  |
| C                                       | -2.93470300 | -0.51699900 | 0.06980300  |
| C                                       | -3.57632800 | -0.88764100 | -1.12540900 |
| C                                       | -3.20928900 | -1.17556300 | 1.28220100  |
| C                                       | -4.50492900 | -1.93131000 | -1.08215000 |
| C                                       | -4.14833000 | -2.20879700 | 1.27967400  |
| C                                       | -4.79362300 | -2.58913100 | 0.10766300  |
| H                                       | -5.00217200 | -2.23128800 | -2.00003700 |
| H                                       | -4.36988400 | -2.72251200 | 2.21060800  |
| H                                       | -5.51507100 | -3.39987900 | 0.12111000  |
| C                                       | -3.28783500 | -0.17559600 | -2.42416800 |

|    |             |             |             |
|----|-------------|-------------|-------------|
| H  | -3.78451900 | 0.80004800  | -2.47138300 |
| H  | -2.21902700 | 0.00185900  | -2.55616400 |
| H  | -3.64496800 | -0.76086800 | -3.27382200 |
| C  | -2.51468600 | -0.76865000 | 2.55763000  |
| H  | -1.42689000 | -0.81983900 | 2.45470800  |
| H  | -2.75036600 | 0.26212600  | 2.84046600  |
| H  | -2.80881900 | -1.41710400 | 3.38517900  |
| C  | 3.28783400  | -0.17559800 | -2.42416800 |
| H  | 2.21902600  | 0.00185800  | -2.55616400 |
| H  | 3.78451900  | 0.80004600  | -2.47138500 |
| H  | 3.64496600  | -0.76087100 | -3.27382300 |
| C  | 2.51468600  | -0.76864800 | 2.55763000  |
| H  | 2.75036500  | 0.26212800  | 2.84046400  |
| H  | 1.42689000  | -0.81983800 | 2.45470800  |
| H  | 2.80882000  | -1.41710100 | 3.38518000  |
| C  | -0.00000100 | -1.52365300 | -0.97712000 |
| H  | -0.87897400 | -1.60105400 | -1.62855400 |
| H  | 0.87897200  | -1.60105400 | -1.62855500 |
| C  | 0.00000000  | -2.72839400 | -0.01594600 |
| H  | -0.87712800 | -2.69397500 | 0.64142400  |
| H  | 0.87712800  | -2.69397500 | 0.64142400  |
| C  | 0.00000000  | -4.08374500 | -0.74323900 |
| H  | -0.88312800 | -4.18430000 | -1.38210000 |
| H  | 0.88312900  | -4.18429900 | -1.38210000 |
| H  | 0.00000100  | -4.92387500 | -0.03852200 |
| Co | 0.00000000  | 0.20716300  | -0.01227000 |

**<sup>0</sup>Co(+)B-1C**

|   |             |            |             |
|---|-------------|------------|-------------|
| C | -1.03156700 | 3.20945500 | 0.05767100  |
| C | -0.99338300 | 4.60093800 | 0.10180400  |
| C | 0.24332900  | 5.24880000 | 0.12674000  |
| C | 1.41743100  | 4.49326700 | 0.10596100  |
| C | 1.33178900  | 3.10384800 | 0.06163100  |
| N | 0.11985900  | 2.47835700 | 0.03862600  |
| H | 0.29169800  | 6.33096000 | 0.16139000  |
| H | -1.91375900 | 5.17308800 | 0.11680500  |
| H | 2.38484300  | 4.98169500 | 0.12456700  |
| C | -2.19247800 | 2.33764100 | 0.02110700  |
| C | 2.41026900  | 2.13182800 | 0.02859000  |
| N | 1.99762600  | 0.88649200 | -0.00624100 |
| N | -1.89151500 | 1.06094200 | -0.01341900 |
| C | 3.84310300  | 2.58095500 | 0.03023400  |
| H | 4.03509600  | 3.25686400 | -0.80878500 |

|    |             |             |             |
|----|-------------|-------------|-------------|
| H  | 4.07134400  | 3.13634600  | 0.94571100  |
| H  | 4.53267300  | 1.74301000  | -0.04060000 |
| C  | -3.58006400 | 2.91116300  | 0.01812600  |
| H  | -3.75459100 | 3.50256400  | 0.92267700  |
| H  | -3.71688200 | 3.58408500  | -0.83414300 |
| H  | -4.33992200 | 2.13483800  | -0.03380300 |
| C  | 2.96935300  | -0.16994600 | -0.05346200 |
| C  | 3.46499500  | -0.70116200 | 1.14814800  |
| C  | 3.37667400  | -0.66364900 | -1.30386800 |
| C  | 4.40695400  | -1.72943300 | 1.07433700  |
| C  | 4.32061600  | -1.69309100 | -1.32956800 |
| C  | 4.83835000  | -2.22112600 | -0.15220800 |
| H  | 4.79422100  | -2.15692800 | 1.99410300  |
| H  | 4.64385300  | -2.08808500 | -2.28805800 |
| H  | 5.56247600  | -3.02819400 | -0.18992500 |
| C  | -2.95049300 | 0.09225800  | -0.06140300 |
| C  | -3.37893100 | -0.38365200 | -1.31187500 |
| C  | -3.49906500 | -0.38620400 | 1.13931900  |
| C  | -4.39444700 | -1.34216600 | -1.33910500 |
| C  | -4.51404100 | -1.34304700 | 1.06416700  |
| C  | -4.96411600 | -1.81718400 | -0.16279500 |
| H  | -4.73321100 | -1.72409400 | -2.29737900 |
| H  | -4.94277000 | -1.72955300 | 1.98361000  |
| H  | -5.74604600 | -2.56844000 | -0.20168800 |
| C  | -2.75530000 | 0.12217100  | -2.58805700 |
| H  | -2.98552800 | 1.17808300  | -2.76710100 |
| H  | -1.66551300 | 0.03878800  | -2.55484700 |
| H  | -3.11547800 | -0.44436100 | -3.44841100 |
| C  | -3.00411100 | 0.11137600  | 2.47443000  |
| H  | -1.91292900 | 0.08395800  | 2.52940400  |
| H  | -3.30553100 | 1.14759200  | 2.66441700  |
| H  | -3.40113700 | -0.49939100 | 3.28684100  |
| C  | 2.81336000  | -0.09750100 | -2.58323100 |
| H  | 1.72036800  | -0.07889000 | -2.56104000 |
| H  | 3.14260300  | 0.93280800  | -2.75712700 |
| H  | 3.12794500  | -0.69192100 | -3.44284100 |
| C  | 2.99740500  | -0.17617000 | 2.48284500  |
| H  | 3.37988900  | 0.83055700  | 2.68466600  |
| H  | 1.90718300  | -0.11443700 | 2.52762200  |
| H  | 3.33613700  | -0.82285700 | 3.29408700  |
| Co | 0.04025400  | 0.65305800  | -0.00031300 |
| Al | -0.24771600 | -3.91962400 | 0.14614500  |
| C  | -0.77778800 | -4.25881400 | -1.74172100 |

|   |             |             |             |
|---|-------------|-------------|-------------|
| H | -1.74561900 | -3.81596200 | -2.00518100 |
| H | -0.04539600 | -3.88285500 | -2.46653300 |
| H | -0.87062100 | -5.33651900 | -1.93525200 |
| C | 1.59326200  | -4.44059000 | 0.68302200  |
| H | 2.36670600  | -4.13938200 | -0.03143500 |
| H | 1.88873200  | -4.03564600 | 1.65818100  |
| H | 1.66399400  | -5.53409100 | 0.77332700  |
| C | -0.03876400 | -1.35060300 | 0.01007100  |
| H | 0.77785800  | -1.75649800 | -0.59300800 |
| H | -1.01807200 | -1.68072400 | -0.34391000 |
| H | 0.10476400  | -1.60595900 | 1.06937400  |
| C | -1.64588800 | -4.09196600 | 1.55005400  |
| H | -1.88220100 | -5.15093700 | 1.72640300  |
| H | -1.33353200 | -3.68721300 | 2.52075400  |
| H | -2.59069900 | -3.60467400 | 1.28714900  |

**<sup>1</sup>Co(+)<sup>B</sup>**

| Atom | x           | y           | z           |
|------|-------------|-------------|-------------|
| C    | 1.17456000  | 2.41075600  | -0.07718100 |
| C    | 1.21197800  | 3.80692300  | -0.08130600 |
| C    | -0.00000300 | 4.49725600  | -0.00001700 |
| C    | -1.21198300 | 3.80692200  | 0.08128500  |
| C    | -1.17456100 | 2.41075500  | 0.07719400  |
| N    | 0.00000100  | 1.78262600  | 0.00002000  |
| H    | -0.00000400 | 5.58114700  | -0.00003100 |
| H    | 2.14731200  | 4.34928000  | -0.14229800 |
| H    | -2.14731800 | 4.34927800  | 0.14225600  |
| C    | 2.32828200  | 1.45960400  | -0.14324300 |
| C    | -2.32828100 | 1.45960200  | 0.14325500  |
| N    | -2.02224500 | 0.19992800  | 0.08650200  |
| N    | 2.02224600  | 0.19992900  | -0.08652300 |
| C    | -3.71258900 | 2.01467900  | 0.28200600  |
| H    | -3.76892000 | 2.67732900  | 1.15086300  |
| H    | -3.97812500 | 2.61573400  | -0.59341700 |
| H    | -4.45494000 | 1.22839400  | 0.39779900  |
| C    | 3.71259200  | 2.01468600  | -0.28196000 |
| H    | 3.76893800  | 2.67734300  | -1.15081100 |
| H    | 3.97811000  | 2.61573400  | 0.59347300  |
| H    | 4.45494600  | 1.22840400  | -0.39774800 |
| C    | -3.02828400 | -0.82693400 | 0.10611500  |
| C    | -3.76703800 | -1.11070800 | -1.05594700 |
| C    | -3.16358100 | -1.58861900 | 1.28094000  |
| C    | -4.67776200 | -2.16968100 | -1.00430900 |

|    |             |             |             |
|----|-------------|-------------|-------------|
| C  | -4.09418000 | -2.62814500 | 1.28563200  |
| C  | -4.84935700 | -2.91813700 | 0.15405400  |
| H  | -5.25539600 | -2.40933000 | -1.89131700 |
| H  | -4.22209200 | -3.21867500 | 2.18708500  |
| H  | -5.56371900 | -3.73376400 | 0.17234700  |
| C  | 3.02828500  | -0.82693300 | -0.10611900 |
| C  | 3.76702900  | -1.11069900 | 1.05595100  |
| C  | 3.16359000  | -1.58862800 | -1.28093700 |
| C  | 4.67775100  | -2.16967500 | 1.00432900  |
| C  | 4.09418800  | -2.62815500 | -1.28561300 |
| C  | 4.84935500  | -2.91814000 | -0.15402600 |
| H  | 5.25537600  | -2.40931900 | 1.89134500  |
| H  | 4.22210700  | -3.21869300 | -2.18706100 |
| H  | 5.56371500  | -3.73376800 | -0.17230600 |
| C  | 3.58348000  | -0.32602200 | 2.33270700  |
| H  | 4.06987700  | 0.65425800  | 2.29053700  |
| H  | 2.52823200  | -0.15250300 | 2.56105200  |
| H  | 4.02017900  | -0.85945900 | 3.17761700  |
| C  | 2.33063900  | -1.28985400 | -2.50213300 |
| H  | 1.25567400  | -1.36738600 | -2.28928800 |
| H  | 2.50373600  | -0.28120700 | -2.88901500 |
| H  | 2.54941100  | -1.99276200 | -3.30643000 |
| C  | -2.33061700 | -1.28983600 | 2.50212600  |
| H  | -1.25565400 | -1.36737400 | 2.28927100  |
| H  | -2.50370700 | -0.28118600 | 2.88900200  |
| H  | -2.54938300 | -1.99273800 | 3.30643100  |
| C  | -3.58349600 | -0.32603900 | -2.33270900 |
| H  | -4.06984900 | 0.65426200  | -2.29052500 |
| H  | -2.52824700 | -0.15256500 | -2.56108300 |
| H  | -4.02024200 | -0.85945800 | -3.17760500 |
| Co | -0.00000100 | -0.18030400 | -0.00002600 |

**<sup>1</sup>Co(+)<sup>B</sup>-1B**

| Atom | x           | y          | z           |
|------|-------------|------------|-------------|
| C    | 1.16360000  | 2.43085300 | -0.08676600 |
| C    | 1.19967200  | 3.82539000 | -0.15475400 |
| C    | -0.00000800 | 4.52783300 | -0.18076800 |
| C    | -1.19968200 | 3.82538500 | -0.15456400 |
| C    | -1.16360300 | 2.43084800 | -0.08662300 |
| N    | 0.00000500  | 1.76412200 | -0.03729600 |
| H    | -0.00001600 | 5.61064600 | -0.22925200 |
| H    | 2.14248600  | 4.35504000 | -0.18811000 |
| H    | -2.14250200 | 4.35503600 | -0.18774200 |
| C    | 2.38581500  | 1.57450300 | -0.08843700 |

|   |             |             |             |
|---|-------------|-------------|-------------|
| C | -2.38583100 | 1.57448000  | -0.08829100 |
| N | -2.18006100 | 0.30888100  | -0.03236800 |
| N | 2.18001400  | 0.30889700  | -0.03242200 |
| C | -3.72905400 | 2.24205300  | -0.18332700 |
| H | -3.89510300 | 2.90692600  | 0.66943100  |
| H | -3.79011500 | 2.85671700  | -1.08615600 |
| H | -4.53475900 | 1.51268300  | -0.21182700 |
| C | 3.72905300  | 2.24203400  | -0.18363000 |
| H | 3.79014300  | 2.85644300  | -1.08663200 |
| H | 3.89510200  | 2.90713700  | 0.66894400  |
| H | 4.53473700  | 1.51263600  | -0.21192500 |
| C | -3.27717600 | -0.61506300 | -0.03976400 |
| C | -3.60043100 | -1.25527000 | -1.24901500 |
| C | -3.93725600 | -0.92105400 | 1.16290600  |
| C | -4.62071600 | -2.20865400 | -1.23501800 |
| C | -4.94644200 | -1.88720600 | 1.12743800  |
| C | -5.29050000 | -2.52603600 | -0.05822200 |
| H | -4.88889700 | -2.70770300 | -2.16078800 |
| H | -5.46597200 | -2.13929200 | 2.04646100  |
| H | -6.07666000 | -3.27290500 | -0.06472900 |
| C | 3.27712500  | -0.61507100 | -0.03976100 |
| C | 3.93713900  | -0.92098100 | 1.16297700  |
| C | 3.60044300  | -1.25534400 | -1.24894500 |
| C | 4.94627400  | -1.88718600 | 1.12764400  |
| C | 4.62068800  | -2.20877600 | -1.23481400 |
| C | 5.29037200  | -2.52611800 | -0.05795400 |
| H | 5.46575200  | -2.13921900 | 2.04671000  |
| H | 4.88890700  | -2.70789900 | -2.16053300 |
| H | 6.07650100  | -3.27302100 | -0.06436300 |
| C | 3.58019000  | -0.23339900 | 2.45864600  |
| H | 3.93275900  | 0.80325400  | 2.48485900  |
| H | 2.49958800  | -0.20446000 | 2.62687800  |
| H | 4.03471500  | -0.74542200 | 3.30750200  |
| C | 2.87865800  | -0.91422000 | -2.52906100 |
| H | 1.79250700  | -1.01056300 | -2.42377200 |
| H | 3.07233700  | 0.11446300  | -2.85006500 |
| H | 3.19164800  | -1.57181400 | -3.34072400 |
| C | -3.58037400 | -0.23361300 | 2.45867400  |
| H | -2.49974300 | -0.20377800 | 2.62650000  |
| H | -3.93387200 | 0.80271400  | 2.48537800  |
| H | -4.03412600 | -0.74631700 | 3.30753800  |
| C | -2.87845600 | -0.91417400 | -2.52903200 |
| H | -3.07107800 | 0.11487900  | -2.84946000 |

|    |             |             |             |
|----|-------------|-------------|-------------|
| H  | -1.79238600 | -1.01171800 | -2.42390700 |
| H  | -3.19219600 | -1.57101400 | -3.34101200 |
| Co | 0.00009500  | -0.30915300 | 0.17041700  |
| C  | 0.68508400  | -2.28105900 | 0.63572000  |
| H  | 1.24678800  | -2.20441800 | 1.56140900  |
| H  | 1.25331400  | -2.62761800 | -0.22081200 |
| C  | -0.68496300 | -2.28106800 | 0.63542600  |
| H  | -1.25279400 | -2.62757100 | -0.22140700 |
| H  | -1.24708400 | -2.20453600 | 1.56086000  |

**<sup>1</sup>Co(+)<sup>B</sup>-2B**

| Atom | x           | y           | z           |
|------|-------------|-------------|-------------|
| C    | 1.12467500  | 0.63400200  | -2.18520400 |
| C    | 1.20650000  | 1.40812500  | -3.34423600 |
| C    | 0.03486200  | 1.88880600  | -3.91871700 |
| C    | -1.18855600 | 1.57010100  | -3.33791900 |
| C    | -1.20358800 | 0.80041400  | -2.17323800 |
| N    | -0.06055700 | 0.37408500  | -1.60475200 |
| H    | 0.07456300  | 2.50134500  | -4.81207800 |
| H    | 2.16558900  | 1.63947700  | -3.78850500 |
| H    | -2.11102500 | 1.92040100  | -3.78302300 |
| C    | 2.29998300  | 0.00054200  | -1.53449500 |
| C    | -2.44665200 | 0.35891200  | -1.49269800 |
| N    | -2.28367500 | -0.36590000 | -0.44063300 |
| N    | 2.04699300  | -0.72172200 | -0.49875500 |
| C    | -3.77703900 | 0.75422000  | -2.07786200 |
| H    | -3.88336600 | 1.84302000  | -2.09335300 |
| H    | -3.87214800 | 0.40507900  | -3.11012800 |
| H    | -4.59991100 | 0.33883600  | -1.49997500 |
| C    | 3.66456800  | 0.21667900  | -2.13348600 |
| H    | 3.69499000  | -0.11208500 | -3.17631100 |
| H    | 3.92257900  | 1.27994800  | -2.11988200 |
| H    | 4.42737000  | -0.32813400 | -1.58131800 |
| C    | -3.39129500 | -0.94748300 | 0.24837700  |
| C    | -3.77705000 | -2.25396400 | -0.10920400 |
| C    | -4.01628500 | -0.26067700 | 1.30629500  |
| C    | -4.79989400 | -2.86653000 | 0.61794400  |
| C    | -5.03476000 | -0.91627200 | 2.00333100  |
| C    | -5.42582400 | -2.20805400 | 1.67001900  |
| H    | -5.10437500 | -3.87432500 | 0.35151500  |
| H    | -5.52522700 | -0.39827400 | 2.82193200  |
| H    | -6.21527300 | -2.69959600 | 2.22903100  |
| C    | 3.06086700  | -1.49879300 | 0.14119100  |
| C    | 3.82584000  | -0.96846900 | 1.19707300  |

|    |             |             |             |
|----|-------------|-------------|-------------|
| C  | 3.20636400  | -2.83940800 | -0.26866600 |
| C  | 4.73839000  | -1.81395400 | 1.83524400  |
| C  | 4.12942300  | -3.64388400 | 0.40218100  |
| C  | 4.89113300  | -3.14061000 | 1.45047800  |
| H  | 5.33654400  | -1.41581300 | 2.64920000  |
| H  | 4.24822800  | -4.67845900 | 0.09398100  |
| H  | 5.60238000  | -3.77901800 | 1.96418500  |
| C  | 3.68245100  | 0.46396100  | 1.64795700  |
| H  | 3.72777600  | 1.17447400  | 0.81907600  |
| H  | 2.73143000  | 0.64038400  | 2.15632400  |
| H  | 4.47632600  | 0.72917700  | 2.34758900  |
| C  | 2.39994300  | -3.39222800 | -1.41841500 |
| H  | 1.33562900  | -3.16749300 | -1.31238300 |
| H  | 2.71591100  | -2.96820400 | -2.37810800 |
| H  | 2.51558500  | -4.47527800 | -1.48833100 |
| C  | -3.62060400 | 1.14686400  | 1.67688700  |
| H  | -2.55499400 | 1.23117300  | 1.89690300  |
| H  | -3.82796800 | 1.85922500  | 0.87190400  |
| H  | -4.17099000 | 1.48495200  | 2.55607600  |
| C  | -3.12239600 | -2.96968700 | -1.26560900 |
| H  | -3.42358100 | -2.54351800 | -2.22928900 |
| H  | -2.03275200 | -2.90296700 | -1.22056100 |
| H  | -3.40045000 | -4.02507500 | -1.27776200 |
| Co | -0.10789000 | -0.37805700 | 0.33282900  |
| C  | -0.23155700 | -2.27198200 | 1.29470200  |
| H  | 0.64669300  | -2.84195000 | 1.01233700  |
| H  | -1.18942600 | -2.71730100 | 1.04867500  |
| C  | -0.14479200 | -1.27881800 | 2.24951600  |
| H  | -1.03126900 | -0.91783100 | 2.76152100  |
| H  | 0.79912800  | -1.04575900 | 2.73189300  |
| Al | 0.69442500  | 3.91423100  | 1.27478500  |
| C  | 1.60729000  | 4.27721000  | -0.49577000 |
| H  | 2.53187400  | 3.69440800  | -0.62822500 |
| H  | 0.97168500  | 4.05908100  | -1.36640100 |
| H  | 1.90315700  | 5.33038500  | -0.59754800 |
| C  | -1.05066200 | 4.90057000  | 1.47944300  |
| H  | -1.73283200 | 4.74825200  | 0.63012500  |
| H  | -1.60660500 | 4.60547900  | 2.38028500  |
| H  | -0.90675400 | 5.98709800  | 1.55763200  |
| C  | 0.15740800  | 1.84302800  | 1.16607900  |
| H  | -0.67333500 | 1.90005600  | 0.46611300  |
| H  | 1.09333900  | 1.44282900  | 0.77498000  |
| H  | -0.10019800 | 1.51932600  | 2.17000600  |



|   |            |            |            |
|---|------------|------------|------------|
| C | 1.93675200 | 4.08695300 | 2.84905600 |
| H | 2.27620900 | 5.12262900 | 2.98995100 |
| H | 1.46906200 | 3.79150200 | 3.79839600 |
| H | 2.84967300 | 3.48238500 | 2.75243100 |

**<sup>1</sup>Co(+)<sup>B</sup>-TS2B/3B**

| Atom | x           | y           | z           |
|------|-------------|-------------|-------------|
| C    | -1.09017700 | -0.82058000 | 2.45619800  |
| C    | -1.10467500 | -0.85065700 | 3.84637600  |
| C    | 0.09060000  | -0.73108000 | 4.55901100  |
| C    | 1.28734000  | -0.61523500 | 3.84854100  |
| C    | 1.27238500  | -0.59531900 | 2.45762100  |
| N    | 0.08730000  | -0.67011200 | 1.76157200  |
| H    | 0.09073400  | -0.74146300 | 5.64262300  |
| H    | -2.04150200 | -0.96573400 | 4.37824200  |
| H    | 2.22736900  | -0.54688700 | 4.38292800  |
| C    | -2.27752600 | -0.97527700 | 1.62739300  |
| C    | 2.47266100  | -0.56277900 | 1.63291200  |
| N    | 2.28563500  | -0.52323000 | 0.34134500  |
| N    | -2.10042600 | -0.85847200 | 0.33868800  |
| C    | 3.83115000  | -0.62784600 | 2.28987600  |
| H    | 3.97456300  | 0.20968400  | 2.97858200  |
| H    | 3.94816400  | -1.54692600 | 2.87142900  |
| H    | 4.62815800  | -0.59419600 | 1.54943800  |
| C    | -3.60634100 | -1.28472500 | 2.27358800  |
| H    | -3.54116900 | -2.16870500 | 2.91338200  |
| H    | -3.93795100 | -0.45329600 | 2.90311500  |
| H    | -4.37525700 | -1.46396100 | 1.52442200  |
| C    | 3.37131800  | -0.64010100 | -0.57167400 |
| C    | 3.74074800  | -1.92204500 | -1.02826200 |
| C    | 4.01362800  | 0.51313300  | -1.06249800 |
| C    | 4.74381800  | -2.02418800 | -1.99485600 |
| C    | 5.01231500  | 0.36308600  | -2.02797200 |
| C    | 5.37600700  | -0.89328200 | -2.49943900 |
| H    | 5.02949900  | -3.00863200 | -2.35435300 |
| H    | 5.51050500  | 1.24914100  | -2.41094400 |
| H    | 6.14965700  | -0.99064900 | -3.25432800 |
| C    | -3.16156400 | -1.07745100 | -0.58631300 |
| C    | -4.02726300 | -0.02797900 | -0.94803100 |
| C    | -3.28306300 | -2.35099700 | -1.18392700 |
| C    | -4.97744700 | -0.25851000 | -1.94792800 |
| C    | -4.24976500 | -2.53621400 | -2.17317700 |
| C    | -5.08735100 | -1.49703900 | -2.56640500 |
| H    | -5.64166500 | 0.55114600  | -2.23727500 |

|    |             |             |             |
|----|-------------|-------------|-------------|
| H  | -4.34498900 | -3.51256400 | -2.63960300 |
| H  | -5.82610800 | -1.65575900 | -3.34544700 |
| C  | -3.99437400 | 1.30676700  | -0.24451000 |
| H  | -4.68862200 | 1.32001200  | 0.60412300  |
| H  | -3.00847700 | 1.54434900  | 0.15229000  |
| H  | -4.29618000 | 2.11377300  | -0.91565700 |
| C  | -2.42284600 | -3.50538100 | -0.73198300 |
| H  | -1.36664300 | -3.23345700 | -0.68850900 |
| H  | -2.70290400 | -3.84329500 | 0.27223000  |
| H  | -2.53074000 | -4.35825200 | -1.40508400 |
| C  | 3.65971900  | 1.88128900  | -0.53686800 |
| H  | 2.58552100  | 2.06580900  | -0.57041200 |
| H  | 3.96594400  | 2.00605100  | 0.50766200  |
| H  | 4.15387600  | 2.66381800  | -1.11547500 |
| C  | 3.08629600  | -3.16138800 | -0.46972400 |
| H  | 3.38627800  | -3.34399300 | 0.56819200  |
| H  | 1.99750700  | -3.07606600 | -0.47139700 |
| H  | 3.36433300  | -4.04387200 | -1.04937900 |
| Co | 0.06960500  | -0.49764800 | -0.18862000 |
| C  | 0.20278900  | -1.21747300 | -2.13692400 |
| H  | -0.68423400 | -1.79121200 | -2.38824900 |
| H  | 1.14578700  | -1.73048400 | -2.29484000 |
| C  | 0.17161000  | 0.17777600  | -2.44405600 |
| H  | 1.10322000  | 0.62553100  | -2.76986900 |
| H  | -0.69481900 | 0.57452400  | -2.96269800 |
| Al | -0.59009100 | 4.46041300  | -0.05611300 |
| C  | -1.19393700 | 3.95159200  | 1.75906400  |
| H  | -1.36838100 | 4.85162700  | 2.36545500  |
| H  | -2.13500900 | 3.39165700  | 1.76867300  |
| H  | -0.45761000 | 3.35574100  | 2.30930400  |
| C  | 1.27436200  | 5.07739200  | -0.30263200 |
| H  | 1.99215400  | 4.58814500  | 0.36418700  |
| H  | 1.64522200  | 4.95620200  | -1.32636000 |
| H  | 1.34252400  | 6.15275000  | -0.08507300 |
| C  | -0.13897800 | 1.64754400  | -1.01631000 |
| H  | 0.32309600  | 1.76078200  | -0.02669200 |
| H  | -1.21326800 | 1.80561400  | -0.96705300 |
| H  | 0.33156600  | 2.34762100  | -1.70179300 |
| C  | -1.91878400 | 4.88449500  | -1.45944500 |
| H  | -2.84404400 | 4.30479600  | -1.37668600 |
| H  | -2.21420300 | 5.94128100  | -1.39939000 |
| H  | -1.53353500 | 4.73800700  | -2.47462100 |

**<sup>1</sup>Co(+)<sup>B</sup>-3B**

| Atom | x           | y           | z           |
|------|-------------|-------------|-------------|
| C    | 1.18583200  | 2.67571500  | 0.10616600  |
| C    | 1.20677500  | 4.06507000  | 0.03196000  |
| C    | 0.00009800  | 4.77249000  | 0.03276400  |
| C    | -1.20661600 | 4.06512200  | 0.03195700  |
| C    | -1.18572700 | 2.67577300  | 0.10617000  |
| N    | 0.00002700  | 2.00769300  | 0.25831300  |
| H    | 0.00011800  | 5.85468700  | -0.02788900 |
| H    | 2.14657300  | 4.59810200  | -0.05356500 |
| H    | -2.14638800 | 4.59819900  | -0.05356500 |
| C    | 2.33869100  | 1.79857900  | -0.03424000 |
| C    | -2.33863600 | 1.79868500  | -0.03424700 |
| N    | -2.05967300 | 0.52199100  | -0.15754700 |
| N    | 2.05967500  | 0.52188100  | -0.15758000 |
| C    | -3.73055200 | 2.37676500  | -0.05949200 |
| H    | -3.99218600 | 2.82686700  | 0.90323900  |
| H    | -3.80972000 | 3.16383000  | -0.81412600 |
| H    | -4.47265300 | 1.61497600  | -0.29141600 |
| C    | 3.73064800  | 2.37654900  | -0.05941500 |
| H    | 3.80990700  | 3.16361100  | -0.81404500 |
| H    | 3.99229200  | 2.82661600  | 0.90332500  |
| H    | 4.47268900  | 1.61470000  | -0.29133600 |
| C    | -3.07620400 | -0.46536400 | -0.29120600 |
| C    | -3.21970600 | -1.09301600 | -1.54538200 |
| C    | -3.84885400 | -0.87263800 | 0.81430800  |
| C    | -4.16372200 | -2.11081300 | -1.68210500 |
| C    | -4.77505500 | -1.90403300 | 0.63291200  |
| C    | -4.94028100 | -2.51858300 | -0.60207400 |
| H    | -4.28437700 | -2.59294100 | -2.64792300 |
| H    | -5.36918100 | -2.23072500 | 1.48160900  |
| H    | -5.66318700 | -3.31932700 | -0.72086900 |
| C    | 3.07621000  | -0.46549600 | -0.29117000 |
| C    | 3.84876300  | -0.87277300 | 0.81441300  |
| C    | 3.21984800  | -1.09310100 | -1.54534300 |
| C    | 4.77497400  | -1.90417000 | 0.63309100  |
| C    | 4.16387300  | -2.11091000 | -1.68199300 |
| C    | 4.94030600  | -2.51871300 | -0.60188900 |
| H    | 5.36900600  | -2.23089500 | 1.48184100  |
| H    | 4.28462400  | -2.59301500 | -2.64781000 |
| H    | 5.66321100  | -3.31946800 | -0.72062100 |
| C    | 3.69351600  | -0.23103100 | 2.17159700  |
| H    | 4.24269300  | 0.71447700  | 2.24066500  |

|    |             |             |             |
|----|-------------|-------------|-------------|
| H  | 2.64878200  | -0.01641300 | 2.40142300  |
| H  | 4.08234800  | -0.88584500 | 2.95384600  |
| C  | 2.37357200  | -0.66452000 | -2.71722000 |
| H  | 1.30655000  | -0.74220500 | -2.48831900 |
| H  | 2.55477500  | 0.37878400  | -2.99361100 |
| H  | 2.57777100  | -1.28294500 | -3.59348300 |
| C  | -3.69364100 | -0.23092400 | 2.17150900  |
| H  | -2.64886800 | -0.01661600 | 2.40146900  |
| H  | -4.24253300 | 0.71474800  | 2.24053400  |
| H  | -4.08276300 | -0.88562700 | 2.95370300  |
| C  | -2.37327200 | -0.66448400 | -2.71716200 |
| H  | -2.55424100 | 0.37887400  | -2.99347000 |
| H  | -1.30628000 | -0.74241400 | -2.48817900 |
| H  | -2.57751000 | -1.28280800 | -3.59348800 |
| C  | -0.00008100 | -1.59217100 | 1.58988000  |
| H  | 0.87493800  | -1.59032100 | 2.25564500  |
| H  | -0.87489800 | -1.59010100 | 2.25590000  |
| C  | -0.00039300 | -2.89071600 | 0.76399600  |
| H  | 0.87524500  | -2.91651000 | 0.10201300  |
| H  | -0.87623800 | -2.91625300 | 0.10227700  |
| C  | -0.00041100 | -4.17018800 | 1.61519300  |
| H  | 0.88218500  | -4.20890700 | 2.26221300  |
| H  | -0.88284900 | -4.20870900 | 2.26244000  |
| H  | -0.00058800 | -5.07527900 | 0.99641500  |
| Co | 0.00003100  | 0.05375100  | 0.42648100  |

**<sup>1</sup>Co(+)<sup>B</sup>-1C**

|   |             |            |             |
|---|-------------|------------|-------------|
| C | -1.16670100 | 3.00936200 | -0.70197100 |
| C | -1.18002300 | 4.35652600 | -1.04931900 |
| C | 0.03006600  | 5.02138500 | -1.27144700 |
| C | 1.23277400  | 4.33780400 | -1.06733700 |
| C | 1.20366100  | 2.99123500 | -0.71834200 |
| N | 0.01357300  | 2.31927600 | -0.64818900 |
| H | 0.03623500  | 6.07073900 | -1.54223500 |
| H | -2.11673300 | 4.89607600 | -1.12455500 |
| H | 2.17644500  | 4.86287000 | -1.15672000 |
| C | -2.32569300 | 2.22073400 | -0.30155700 |
| C | 2.35482600  | 2.18718200 | -0.32609900 |
| N | 2.06954900  | 1.01220800 | 0.17886400  |
| N | -2.05355200 | 1.03938900 | 0.19516400  |
| C | 3.74844100  | 2.73860700 | -0.47807300 |
| H | 4.00502400  | 2.88214200 | -1.53214800 |
| H | 3.83417600  | 3.71334700 | 0.00953500  |

|    |             |             |             |
|----|-------------|-------------|-------------|
| H  | 4.48831200  | 2.07550600  | -0.03403700 |
| C  | -3.71194900 | 2.79462300  | -0.43801400 |
| H  | -3.78018800 | 3.76223500  | 0.06650600  |
| H  | -3.97163600 | 2.95994500  | -1.48804100 |
| H  | -4.45931000 | 2.13547300  | -0.00083900 |
| C  | 3.08180100  | 0.10351700  | 0.60514100  |
| C  | 3.23220800  | -0.10712100 | 1.99041500  |
| C  | 3.83865400  | -0.63058900 | -0.32829700 |
| C  | 4.17189200  | -1.04132000 | 2.42635500  |
| C  | 4.76010400  | -1.56468800 | 0.15501200  |
| C  | 4.93432300  | -1.76882100 | 1.51802400  |
| H  | 4.29898800  | -1.20451100 | 3.49252300  |
| H  | 5.34006400  | -2.14510900 | -0.55620100 |
| H  | 5.65218000  | -2.50158700 | 1.87189200  |
| C  | -3.07586000 | 0.13839900  | 0.61255700  |
| C  | -3.84761000 | -0.56978400 | -0.32921500 |
| C  | -3.22097600 | -0.09461200 | 1.99465200  |
| C  | -4.78004800 | -1.49832800 | 0.14361000  |
| C  | -4.17180700 | -1.02229100 | 2.42007300  |
| C  | -4.95024200 | -1.72261400 | 1.50400400  |
| H  | -5.37249300 | -2.05822100 | -0.57384200 |
| H  | -4.29486800 | -1.20232600 | 3.48397100  |
| H  | -5.67713200 | -2.45040600 | 1.84956300  |
| C  | -3.68453500 | -0.35966800 | -1.81522700 |
| H  | -4.22887100 | 0.52444800  | -2.16541000 |
| H  | -2.63860100 | -0.22639600 | -2.09739700 |
| H  | -4.07178700 | -1.21617900 | -2.36950800 |
| C  | -2.36765400 | 0.64725300  | 2.99226800  |
| H  | -1.30200700 | 0.46837600  | 2.81735900  |
| H  | -2.51354500 | 1.73016300  | 2.93440300  |
| H  | -2.59743400 | 0.33300200  | 4.01205000  |
| C  | 3.67315300  | -0.44058000 | -1.81647900 |
| H  | 2.63044200  | -0.27804900 | -2.09413300 |
| H  | 4.24332800  | 0.42005700  | -2.18386900 |
| H  | 4.02910900  | -1.31850700 | -2.35799700 |
| C  | 2.39765500  | 0.66603600  | 2.98030800  |
| H  | 2.56494900  | 1.74488400  | 2.90576100  |
| H  | 1.32784200  | 0.50652800  | 2.81275100  |
| H  | 2.62596200  | 0.36264000  | 4.00371000  |
| Co | 0.00571800  | 0.41938800  | -0.19728400 |
| Al | -0.03503000 | -4.12657200 | -1.14575300 |
| C  | -1.60657400 | -4.21877100 | -2.36178600 |
| H  | -2.54781100 | -3.94424500 | -1.87081500 |

|   |             |             |             |
|---|-------------|-------------|-------------|
| H | -1.50630800 | -3.58047900 | -3.24808500 |
| H | -1.74657600 | -5.24110700 | -2.73949700 |
| C | 1.76549400  | -4.31522500 | -1.96939800 |
| H | 1.86177800  | -3.79020600 | -2.92764600 |
| H | 2.57192100  | -3.95453400 | -1.31998600 |
| H | 1.99022500  | -5.37052000 | -2.17740800 |
| C | -0.01746200 | -1.55323500 | -0.69124000 |
| H | 0.78693700  | -1.75722800 | -1.40144200 |
| H | -0.99924000 | -1.80242900 | -1.09895800 |
| H | 0.15917700  | -2.05622200 | 0.26654000  |
| C | -0.27279700 | -4.77730100 | 0.71635500  |
| H | -0.37922900 | -5.87083700 | 0.73523500  |
| H | 0.57581600  | -4.54320100 | 1.37019600  |
| H | -1.17184000 | -4.37656700 | 1.19950200  |
